# Supplementary material for: Changes in Abundance of Oral Microbiota Associated with Oral Cancer
Source: PLoS One. 2014 Jun 2;9(6):e98741. doi: 10.1371/journal.pone.0098741 (PMC4041887; doi:10.1371/journal.pone.0098741)
Supplement: Table S4 — Study 2 pre-cancer patients. (XLSX) [file pone.0098741.s012.xlsx]

## Sheet: Sheet1
Pre-cancer cohort
SG Number	Sample name	Patient id	Sample id	Diagnosis	Age	Sex	Site	Precancer size (cm)	Grade	Immunocompromised	Smoker	Alcohol
PT12-4292	p105D1	105	B0111	Moderate epithelial dysplasia	79	F	Lower right labial mucosa	0.8 x 0.8	Moderate	No	Non-smoker	Current
PT12-4294	p105D3	105	B0113	Mild epithelial Dysplasia	79	F	Lower left labial mucosa	0.8 x 0.8	Mild	No	Non-smoker	Current
PT12-4293	p105N1	105	B0115	Normal			Right upper buccal mucosa
PT12-4296	p107D	107	B0117	Mild epithelial Dysplasia	53	F	Midline hard palate	1 x 1	Mild	No	Current	Non-drinker
PT12-4297	p107N	107	B0118	Normal			hard palate 1 cm lateral to lesion
PT12-4298	p109D1	109	B0121	Verrucous epithelial hyperplasia and hyperkeratosis with mild epithelial dysplasia	53	F	Left lateral tongue	0.7	Mild	No	Non-smoker	Non-drinker
PT12-4299	p109N1	109	B0122	Normal			Right lateral tongue
PT12-4300	p111D1	111	B0129	epithelial hyperplasia and hyperkeratosis with mild epithelial dysplasia and candidiasis	50	M	Right buccal mucosa	2 x 1	Mild	No	Current	Non-drinker
PT12-4301	p111N1	111	B0130	Normal			Left buccal mucosa
PT12-4302	p118D1	118	B0151	Severe dysplasia	68	F	Left lateral tongue	2 x 1	Severe	No	Non-smoker	Non-drinker
PT12-4303	p118N1	118	B0152	Normal			Right lateral tongue
PT12-4304	p135D	135	B0234	Epithelial dysplasia, moderate to severe.	52	M	Right lateral tongue	0.6 x 0.6	Severe	No	Non-smoker	Previous
PT12-4305	p135N	135	B0235	Normal			Left lateral tongue
PT12-4306	p139D	139	B0240	Chronic mucositis with mild epithelial dysplasia	64	F	Right buccal mucosa	1.5 x 1.5	Mild	No	Previous	Non-drinker
PT12-4307	p139N	139	B0241	Normal			Left buccal mucosa
PT12-4308	p150D	150	B0292	precancer	49	M	Left labial mucosa	3 x 3	Severe	Yes	Current	Previous
PT12-4309	p150N	150	B0293	Normal			Right labial mucosa
*Second Genome sample number
