# Supplementary material for: Changes in Abundance of Oral Microbiota Associated with Oral Cancer
Source: PLoS One. 2014 Jun 2;9(6):e98741. doi: 10.1371/journal.pone.0098741 (PMC4041887; doi:10.1371/journal.pone.0098741)
Supplement: Table S6 — Replicate samples from cancer and pre-cancer patients. (XLSX) [file pone.0098741.s014.xlsx]

## Sheet: Sheet1
Table S6. Duplicate cancer and pre-cancer samples
SG Number	Sample name	Patient id	Sample id	sample type	Replicated sample	Replicated sample id
Duplicate cancer samples from patients 113, 128, 143
PT12-4310	p113C2	113	B0276	Cancer	p113C1	B0141
PT12-4311	p113N2	113	B0277	Normal	p113N1	B0142
PT12-4312	p128C2	128	B0284	Cancer	p128C1	B0210
PT12-4313	p128N2	128	B0285	Normal	p128N1	B0211
PT12-4314	p143C2	143	B0288	Cancer	p143C1	B0250
PT12-4315	p143N2	143	B0289	Normal	p143N1	B0251
Duplicate pre-cancer samples from patients 105, 109, 111
PT12-4316	p105D2	105	B0112	Precancer	p105D1	B0111
PT12-4317	p105D4	105	B0114	Precancer	p105D3	B0113
PT12-4295	p105N2	105	B0116	Normal	p105N1	B0115
PT12-4318	p109D2	109	B0268	Precancer	p109D1	B0121
PT12-4319	p109N2	109	B0269	Normal	p109N1	B0122
PT12-4320	p111D2	111	B0272	Precancer	p111D1	B0129
PT12-4321	p111N2	111	B0273	Normal	p111N1	B0130
*Second Genome sample number
