# Supplementary material for: Changes in Abundance of Oral Microbiota Associated with Oral Cancer
Source: PLoS One. 2014 Jun 2;9(6):e98741. doi: 10.1371/journal.pone.0098741 (PMC4041887; doi:10.1371/journal.pone.0098741)
Supplement: Table S15 — Study 2 OTU table normalized to one million counts. (XLSX) [file pone.0098741.s023.xlsx]

## Sheet: Sheet1
Table S16. Changes in abundance of genera from the five more abundant phyla.*
Shown are the genera corresponding to >10% of OTUs in >20% of samples in each phylum.
Table S16. Significant changes in abundance of common genera
Genus	Cancer	Pre-cancer	Healthy Normal
Actinobacteria
Actinomyces	0.227	0.106	0.181
Rothia	0.021	0.068	0.435
Bacteroidetes
unclassified	0.539	0.242	0.311
Porphyromonas	0.382	0.367	0.193
Prevotella	0.211	0.07	0.507
Firmicutes
Gemella	0.282	0.394	0.575
Veillonella	0.059	0.879	0.236
Streptococcus	0.003	0.042	0.659
Fusobacteria
Leptotrichia	0.602	0.419	0.605
Fusobacterium	0.044	0.248	0.647
Proteobacteria
unclassified	0.401	0.457	0.833
Neisseria	0.119	0.323	0.964
Haemophilus	0.718	0.644	0.806
ê Significantly decreased in cancer or pre-cancer relative to patient matched normal
é Significantly increased in cancer or pre-cancer relative to patient matched normal
*For patients 114 and 105 with two lesions, only p114C1 and p105D1 samples were included in the calculations.
