# Supplementary material for: Changes in Abundance of Oral Microbiota Associated with Oral Cancer
Source: PLoS One. 2014 Jun 2;9(6):e98741. doi: 10.1371/journal.pone.0098741 (PMC4041887; doi:10.1371/journal.pone.0098741)
Supplement: Table S18 — Study 2 OTU table adjusted for variation in sequencing depth. Data were subsampled by randomly selecting 31,109 sequences from each community. (XLSX) [file pone.0098741.s026.xlsx]

## Sheet: Sheet1
otu	kingdom	phylum	class	order	family	genus	species	representative_gene	hn159TL	hn159FL	hn160FL	hn161TL	hn161FL	hn162FL	hn163FL	hn164TL	hn164FL	p105D3	p105D1	p107D	p109D1	p111D1	p118D1	p135D	p139D	p150D	p104C	p108C	p113C1	p114C2	p114C1	p116C	p128C1	p131C	p136C	p142C	p143C1	p144C	p146C	p153C	p156C	p104N	p108N	p113N1	p114N	p116N	p117N	p128N1	p136N
16076	k__Bacteria	p__Firmicutes	c__Clostridia	o__Clostridiales	f__Ruminococcaceae	g__Ruminococcus	s__Ruminococcus_bromii	number.1 gg_id:00000 some annotation	0	0	0	0	0	0	0	0	0	0	0	0	0	0	0	0	0	0	0	0	0	142	0	0	0	0	0	0	0	87	0	0	0	0	0	0	0	0	0	0	0
410908	k__Bacteria	p__Actinobacteria	c__Actinobacteria	o__Actinomycetales	f__Corynebacteriaceae	g__Corynebacterium	s__unclassified	number.1 gg_id:00000 some annotation	0	0	0	0	0	0	0	0	0	0	0	0	0	0	0	0	0	0	0	0	0	0	0	0	0	0	0	0	0	0	0	0	0	0	0	0	0	0	0	0	3
86368	k__Bacteria	p__Proteobacteria	c__Betaproteobacteria	o__Burkholderiales	f__Comamonadaceae	g__unclassified	s__unclassified	number.1 gg_id:00000 some annotation	0	0	2	0	0	0	0	0	0	0	0	0	0	0	0	0	0	0	0	0	0	6	0	0	0	0	0	0	0	0	0	0	0	0	0	0	0	0	0	0	0
164787	k__Bacteria	p__Proteobacteria	c__Alphaproteobacteria	o__Sphingomonadales	f__Sphingomonadaceae	g__Novosphingobium	s__unclassified	number.1 gg_id:00000 some annotation	0	0	0	0	0	0	0	0	4	0	0	0	0	0	0	0	0	0	0	0	0	0	0	0	0	0	0	0	0	0	0	0	0	0	0	0	0	0	0	0	0
102054	k__Bacteria	p__Proteobacteria	c__Gammaproteobacteria	o__Xanthomonadales	f__Xanthomonadaceae	g__Stenotrophomonas	s__unclassified	number.1 gg_id:00000 some annotation	0	0	0	0	0	0	0	0	0	0	0	0	0	0	0	0	0	0	0	0	0	0	0	0	0	0	0	0	0	0	0	0	0	0	0	0	0	0	0	0	0
405713	k__Bacteria	p__Firmicutes	c__Clostridia	o__Clostridiales	f__Ruminococcaceae	g__Clostridium	s__Flavonifractor_plautii	number.1 gg_id:00000 some annotation	0	0	0	0	0	0	0	0	36	0	0	0	0	0	0	0	0	0	0	0	0	0	0	0	0	0	0	0	0	0	0	0	0	26	0	0	0	0	0	0	0
522433	k__Bacteria	p__Firmicutes	c__Clostridia	o__Clostridiales	f__Lachnospiraceae	g__unclassified	s__unclassified	number.1 gg_id:00000 some annotation	0	0	0	0	0	0	0	0	0	0	0	0	0	0	0	0	0	0	0	0	0	0	0	0	0	0	0	0	4	0	0	0	0	0	0	0	0	0	0	0	0
209730	k__Bacteria	p__Proteobacteria	c__Betaproteobacteria	o__Burkholderiales	f__Oxalobacteraceae	g__Herbaspirillum	s__unclassified	number.1 gg_id:00000 some annotation	0	0	0	0	0	0	0	0	0	0	0	0	0	0	0	1	0	0	0	0	0	0	0	0	0	0	0	0	0	0	0	0	0	0	0	0	0	0	0	0	0
561483	k__Bacteria	p__Actinobacteria	c__Actinobacteria	o__Bifidobacteriales	f__Bifidobacteriaceae	g__Bifidobacterium	s__unclassified	number.1 gg_id:00000 some annotation	0	0	0	0	0	0	0	0	0	0	0	0	0	0	0	0	0	0	0	0	0	10	0	0	0	29	0	0	0	0	0	0	0	0	0	0	0	0	0	0	0
201726	k__Bacteria	p__Proteobacteria	c__Alphaproteobacteria	o__Rhodobacterales	f__Rhodobacteraceae	g__Rhodobacter	s__unclassified	number.1 gg_id:00000 some annotation	0	0	0	0	0	0	1	0	0	0	0	0	0	0	0	0	0	0	0	0	0	0	0	0	0	0	0	0	0	0	0	0	0	0	0	0	0	0	0	0	0
580223	k__Bacteria	p__Proteobacteria	c__Alphaproteobacteria	o__Rhodobacterales	f__Rhodobacteraceae	g__unclassified	s__unclassified	number.1 gg_id:00000 some annotation	0	0	0	0	0	0	0	0	0	0	0	0	0	0	0	0	0	0	0	0	0	0	0	0	0	0	0	0	0	0	0	0	0	0	0	0	0	0	0	0	0
240104	k__Bacteria	p__Spirochaetes	c__Spirochaetes	o__Spirochaetales	f__Spirochaetaceae	g__Treponema	s__Treponema_medium	number.1 gg_id:00000 some annotation	0	0	0	0	0	0	0	0	0	0	0	0	0	0	0	0	0	0	0	0	0	18	2	0	0	0	0	0	0	0	0	0	0	0	0	0	0	0	0	0	0
177005	k__Bacteria	p__Firmicutes	c__Clostridia	o__Clostridiales	f__Lachnospiraceae	g__Blautia	s__unclassified	number.1 gg_id:00000 some annotation	0	0	0	0	0	0	0	0	0	0	0	0	0	0	0	0	0	0	0	0	0	0	0	0	0	0	0	0	0	3	0	0	0	9	0	0	0	0	0	0	0
14920	k__Bacteria	p__Firmicutes	c__Bacilli	o__Gemellales	f__Gemellaceae	g__Gemella	s__unclassified	number.1 gg_id:00000 some annotation	0	0	0	0	0	0	0	0	0	0	0	0	0	0	0	0	0	0	3	0	0	0	0	0	0	0	0	0	0	0	0	0	0	0	0	0	0	0	0	0	0
266040	k__Bacteria	p__Bacteroidetes	c__Flavobacteria	o__Flavobacteriales	f__Flavobacteriaceae	g__Flavobacterium	s__unclassified	number.1 gg_id:00000 some annotation	0	0	0	0	0	0	0	0	0	0	0	0	0	0	0	0	0	0	0	0	0	0	0	0	0	0	0	0	0	0	0	0	0	0	0	0	0	0	0	0	0
249661	k__Bacteria	p__Bacteroidetes	c__Bacteroidia	o__Bacteroidales	f__Porphyromonadaceae	g__Parabacteroides	s__unclassified	number.1 gg_id:00000 some annotation	0	0	0	0	0	0	0	0	0	0	0	0	0	0	0	0	0	0	0	0	0	0	0	0	0	0	0	0	0	0	0	0	0	0	0	0	0	0	0	0	0
398836	k__Bacteria	p__Actinobacteria	c__Actinobacteria	o__Actinomycetales	f__Microbacteriaceae	g__unclassified	s__unclassified	number.1 gg_id:00000 some annotation	0	0	1	0	3	0	1	0	8	0	0	0	0	0	0	0	0	0	0	0	0	0	0	0	0	0	0	0	0	0	0	0	0	0	0	0	0	0	0	0	0
323276	k__Bacteria	p__Acidobacteria	c__Acidobacteria	o__Acidobacteriales	f__Acidobacteriaceae	g__unclassified	s__unclassified	number.1 gg_id:00000 some annotation	0	0	0	0	0	0	0	0	0	0	0	0	0	0	0	0	0	0	0	0	0	0	0	0	0	0	0	0	1	0	0	0	0	0	0	0	0	0	0	0	0
573041	k__Bacteria	p__Proteobacteria	c__Alphaproteobacteria	o__Rhizobiales	f__Nordellaceae	g__Nordella	s__unclassified	number.1 gg_id:00000 some annotation	0	0	0	0	0	0	0	0	0	0	0	0	0	0	0	0	0	0	0	0	0	0	0	0	0	0	0	0	0	0	0	0	0	0	0	0	0	0	0	0	0
6792	k__Bacteria	p__Proteobacteria	c__Betaproteobacteria	o__Rhodocyclales	f__Rhodocyclaceae	g__unclassified	s__unclassified	number.1 gg_id:00000 some annotation	0	0	0	0	0	0	0	0	0	1	0	0	0	0	0	0	0	0	0	0	0	0	0	0	0	0	0	0	0	0	0	0	0	0	0	0	0	0	0	0	0
348374	k__Bacteria	p__Bacteroidetes	c__Bacteroidia	o__Bacteroidales	f__Bacteroidaceae	g__Bacteroides	s__unclassified	number.1 gg_id:00000 some annotation	0	0	0	0	0	0	0	0	0	0	0	0	0	0	0	0	0	0	0	0	0	0	0	0	0	0	0	0	4	0	0	0	0	0	0	0	0	0	0	0	0
131203	k__Bacteria	p__Firmicutes	c__Clostridia	o__Clostridiales	f__Lachnospiraceae	g__unclassified	s__unclassified	number.1 gg_id:00000 some annotation	0	0	0	0	0	0	0	0	4	0	0	0	0	0	0	0	0	0	0	0	0	0	0	0	0	0	0	0	0	0	0	0	0	0	0	0	0	0	0	0	0
457157	k__Bacteria	p__Proteobacteria	c__Gammaproteobacteria	o__Pseudomonadales	f__Pseudomonadaceae	g__Pseudomonas	s__unclassified	number.1 gg_id:00000 some annotation	0	0	0	0	0	0	0	0	0	0	0	0	0	0	0	0	0	0	0	0	0	0	0	0	0	0	0	0	0	0	0	0	0	1	0	0	0	0	0	0	0
309308	k__Bacteria	p__Proteobacteria	c__Gammaproteobacteria	o__Chromatiales	f__Sinobacteraceae	g__unclassified	s__unclassified	number.1 gg_id:00000 some annotation	0	0	0	0	0	0	0	0	0	0	0	0	0	0	0	0	0	0	0	0	0	19	0	0	0	0	0	0	0	0	0	0	0	0	0	0	0	0	0	0	0
448819	k__Bacteria	p__Firmicutes	c__Clostridia	o__Clostridiales	f__Clostridiales_Family_XI._Incertae_Sedis	g__Anaerococcus	s__Anaerococcus_hydrogenalis	number.1 gg_id:00000 some annotation	0	0	0	0	0	0	0	0	0	0	0	0	0	1	0	0	0	0	0	0	0	0	0	2	0	0	0	0	0	0	0	0	0	0	0	0	0	0	0	0	0
309302	k__Bacteria	p__Firmicutes	c__Clostridia	o__Clostridiales	f__Ruminococcaceae	g__Clostridium	s__Flavonifractor_plautii	number.1 gg_id:00000 some annotation	0	0	0	0	0	0	0	0	16	0	0	0	0	0	0	0	0	0	0	0	0	0	0	0	0	0	0	0	0	0	0	0	0	0	0	0	0	0	0	0	0
64871	k__Bacteria	p__Proteobacteria	c__Betaproteobacteria	o__Burkholderiales	f__unclassified	g__unclassified	s__unclassified	number.1 gg_id:00000 some annotation	0	0	6	0	13	1	2	1	3	3	2	1	1	3	0	13	4	0	0	0	0	185	0	0	0	5	0	0	32	0	0	0	0	0	1	1	0	0	0	0	5
60136	k__Bacteria	p__Actinobacteria	c__Actinobacteria	o__Actinomycetales	f__Actinomycetaceae	g__unclassified	s__unclassified	number.1 gg_id:00000 some annotation	6	0	0	2	0	0	0	12	1	0	0	3	0	2	5	6	0	0	2	0	0	59	3	0	0	2	0	0	1	0	0	0	0	0	1	0	3	1	0	1	0
181016	k__Bacteria	p__Firmicutes	c__Clostridia	o__Clostridiales	f__Ruminococcaceae	g__Eubacterium	s__unclassified	number.1 gg_id:00000 some annotation	0	0	0	0	0	0	0	0	0	0	0	0	0	0	0	0	0	0	0	0	0	0	0	0	0	0	0	0	0	0	0	0	0	0	0	0	0	0	0	0	0
250288	k__Bacteria	p__Firmicutes	c__Clostridia	o__Clostridiales	f__Eubacteriaceae	g__Eubacterium	s__Eubacterium_yurii	number.1 gg_id:00000 some annotation	0	0	0	0	0	0	2	0	0	0	0	2	17	3	0	0	0	0	37	5	100	430	85	0	0	6	44	0	0	0	2	0	0	0	3	2	4	0	0	0	4
21109	k__Bacteria	p__Actinobacteria	c__Actinobacteria	o__Actinomycetales	f__Micrococcaceae	g__Rothia	s__unclassified	number.1 gg_id:00000 some annotation	0	0	0	0	0	0	0	0	0	0	0	0	0	0	0	0	1	0	0	0	0	0	0	0	0	0	0	0	0	0	0	0	0	0	0	0	0	0	0	0	0
405228	k__Bacteria	p__Bacteroidetes	c__Bacteroidia	o__Bacteroidales	f__RikenellaceaeII	g__unclassified	s__unclassified	number.1 gg_id:00000 some annotation	0	0	0	0	0	0	0	0	1	0	0	0	0	0	0	0	0	0	0	0	0	1	0	0	0	0	0	0	0	1	0	0	0	1	0	0	0	0	0	0	0
254471	k__Bacteria	p__Proteobacteria	c__Deltaproteobacteria	o__Myxococcales	f__unclassified	g__unclassified	s__unclassified	number.1 gg_id:00000 some annotation	0	0	0	0	0	0	0	0	0	0	0	0	0	0	0	0	0	0	0	0	0	0	0	0	0	0	0	0	0	0	0	0	0	0	0	0	0	0	0	0	0
241520	k__Bacteria	p__Bacteroidetes	c__Flavobacteria	o__Flavobacteriales	f__Flavobacteriaceae	g__Capnocytophaga	s__unclassified	number.1 gg_id:00000 some annotation	0	2	0	0	1	0	12	0	2	0	0	0	284	8	11	3	18	3	3	1	0	0	11	0	0	0	496	4	0	0	22	994	6	0	23	0	22	0	0	0	336
533785	k__Bacteria	p__Actinobacteria	c__Actinobacteria	o__Bifidobacteriales	f__Bifidobacteriaceae	g__Bifidobacterium	s__unclassified	number.1 gg_id:00000 some annotation	0	0	0	0	0	0	0	0	0	0	0	0	0	0	0	0	0	0	0	0	0	1	0	0	0	3	0	0	0	0	0	0	0	0	0	0	0	0	0	0	0
138735	k__Bacteria	p__Proteobacteria	c__Alphaproteobacteria	o__Sphingomonadales	f__Sphingomonadaceae	g__Sphingobium	s__unclassified	number.1 gg_id:00000 some annotation	0	0	0	0	0	0	0	0	0	0	0	0	0	0	0	0	0	0	0	0	0	0	0	0	0	0	0	0	0	0	0	0	0	0	0	0	0	0	0	0	0
565812	k__Bacteria	p__Firmicutes	c__Clostridia	o__Clostridiales	f__Clostridiales_Family_XI._Incertae_Sedis	g__Peptoniphilus	s__Peptoniphilus_asaccharolyticus	number.1 gg_id:00000 some annotation	0	0	0	0	0	0	0	0	0	0	0	0	0	0	0	0	0	0	0	0	0	0	0	123	1	0	0	0	0	0	0	0	0	0	0	0	0	58	0	0	2
514445	k__Bacteria	p__Firmicutes	c__Clostridia	o__Clostridiales	f__Lachnospiraceae	g__unclassified	s__unclassified	number.1 gg_id:00000 some annotation	0	0	0	0	0	0	0	0	55	0	0	0	0	0	0	0	0	0	0	0	0	0	0	0	0	0	0	0	0	0	0	0	0	0	0	0	0	0	0	0	0
227785	k__Archaea	p__Euryarchaeota	c__Methanobacteria	o__Methanobacteriales	f__Methanobacteriaceae	g__Methanobrevibacter	s__unclassified	number.1 gg_id:00000 some annotation	0	0	0	0	0	0	0	0	27	0	0	0	0	0	0	0	0	0	0	0	0	147	0	0	0	2	0	1	0	838	0	0	0	0	0	0	0	1	0	0	2
227239	k__Bacteria	p__Proteobacteria	c__Alphaproteobacteria	o__unclassified	f__unclassified	g__unclassified	s__unclassified	number.1 gg_id:00000 some annotation	0	0	0	0	0	0	0	0	11	0	0	0	0	0	0	0	0	0	0	0	0	0	0	0	0	0	0	0	0	0	0	0	0	0	0	0	0	0	0	0	0
253550	k__Bacteria	p__Bacteroidetes	c__Bacteroidia	o__Bacteroidales	f__RikenellaceaeII	g__unclassified	s__unclassified	number.1 gg_id:00000 some annotation	0	1	0	0	0	0	0	0	1	0	0	0	0	0	0	1	0	0	0	2213	0	0	1	0	0	1	0	0	0	0	0	0	0	0	23	0	0	0	0	0	0
190023	k__Bacteria	p__Proteobacteria	c__Gammaproteobacteria	o__Enterobacteriales	f__Enterobacteriaceae	g__unclassified	s__unclassified	number.1 gg_id:00000 some annotation	0	0	0	0	0	0	2	0	0	0	0	0	0	0	0	0	0	0	0	0	0	0	0	0	0	0	0	0	0	0	0	0	0	0	0	0	0	0	0	0	0
582864	k__Bacteria	p__Bacteroidetes	c__Sphingobacteria	o__Sphingobacteriales	f__Chitinophagaceae	g__unclassified	s__unclassified	number.1 gg_id:00000 some annotation	0	0	0	0	0	0	0	0	0	0	0	0	0	0	0	0	0	0	0	0	0	0	0	0	0	0	0	0	0	0	0	0	0	0	0	0	0	0	0	0	2
191687	k__Bacteria	p__Firmicutes	c__Clostridia	o__Clostridiales	f__Lachnospiraceae	g__Clostridium	s__unclassified	number.1 gg_id:00000 some annotation	0	0	0	0	0	0	0	0	0	0	0	0	1	0	0	0	0	0	0	0	0	0	0	0	1	0	0	0	0	325	0	0	0	0	0	0	0	0	0	0	2
62513	k__Bacteria	p__Firmicutes	c__Clostridia	o__Clostridiales	f__Lachnospiraceae	g__Moryella	s__Moryella_indoligenes	number.1 gg_id:00000 some annotation	0	0	0	0	0	0	0	0	0	0	0	0	0	0	0	0	0	0	0	0	33	166	0	0	0	0	0	0	0	0	0	0	0	0	0	0	0	0	0	0	0
469893	k__Bacteria	p__Proteobacteria	c__Epsilonproteobacteria	o__Campylobacterales	f__Campylobacteraceae	g__Campylobacter	s__Campylobacter_rectus	number.1 gg_id:00000 some annotation	0	1	0	2	3	0	5	0	15	3	10	1	40	17	11	10	0	4	7	180	199	0	108	0	0	6	425	28	37	0	0	415	0	89	51	68	126	0	1	0	190
305760	k__Bacteria	p__Proteobacteria	c__Gammaproteobacteria	o__Enterobacteriales	f__Enterobacteriaceae	g__Escherichia	s__unclassified	number.1 gg_id:00000 some annotation	0	1	0	0	4	1	22	0	29	0	0	0	0	0	0	0	0	0	0	0	4	0	1	0	1	0	0	0	6	484	0	0	0	108	0	0	0	0	0	0	1
244669	k__Bacteria	p__Bacteroidetes	c__Bacteroidia	o__Bacteroidales	f__Prevotellaceae	g__Prevotella	s__unclassified	number.1 gg_id:00000 some annotation	0	0	0	0	0	0	0	0	0	0	0	1	0	0	0	0	0	0	1	233	314	0	0	1	0	0	0	0	0	0	0	0	0	0	63	9	0	0	0	0	0
320835	k__Bacteria	p__Firmicutes	c__Clostridia	o__Clostridiales	f__Ruminococcaceae	g__unclassified	s__unclassified	number.1 gg_id:00000 some annotation	0	0	0	0	0	0	0	0	0	0	0	0	0	0	0	0	0	0	0	0	0	0	0	0	0	0	0	0	0	134	0	0	0	0	0	0	0	0	0	0	0
2045	k__Bacteria	p__Bacteroidetes	c__Bacteroidia	o__Bacteroidales	f__Bacteroidaceae	g__Bacteroides	s__unclassified	number.1 gg_id:00000 some annotation	0	0	0	0	0	0	0	0	99	0	0	0	0	0	0	0	0	0	0	0	0	0	0	0	0	0	0	0	0	0	0	0	0	283	0	0	0	0	0	0	0
173837	k__Bacteria	p__Firmicutes	c__Clostridia	o__Clostridiales	f__Ruminococcaceae	g__Oscillospira	s__unclassified	number.1 gg_id:00000 some annotation	0	0	0	0	0	0	0	0	6	0	0	0	0	0	0	0	0	0	0	0	0	0	0	0	0	0	0	0	0	0	0	0	0	0	0	0	0	0	0	0	0
162032	k__Bacteria	p__Proteobacteria	c__Alphaproteobacteria	o__Sphingomonadales	f__Sphingomonadaceae	g__Sphingobium	s__unclassified	number.1 gg_id:00000 some annotation	1	0	0	0	1	0	0	0	13	0	0	2	0	1	0	0	1	0	0	0	0	0	5	0	0	0	0	0	1	41	0	0	0	0	0	0	0	0	0	0	0
15202	k__Bacteria	p__Firmicutes	c__Bacilli	o__Lactobacillales	f__Lactobacillaceae	g__Lactobacillus	s__unclassified	number.1 gg_id:00000 some annotation	0	0	0	0	0	0	0	0	0	0	0	0	0	0	0	0	0	0	0	0	0	0	0	0	0	0	0	0	0	0	0	0	0	0	0	0	0	0	0	0	0
6378	k__Bacteria	p__Proteobacteria	c__Betaproteobacteria	o__Neisseriales	f__Neisseriaceae	g__unclassified	s__unclassified	number.1 gg_id:00000 some annotation	0	0	0	0	0	0	3	1	0	0	0	0	0	5	0	2	0	0	0	0	15	0	0	0	2	0	4	0	0	0	0	0	3	0	10	0	31	0	1	0	2
191199	k__Bacteria	p__Bacteroidetes	c__Bacteroidia	o__Bacteroidales	f__RikenellaceaeII	g__unclassified	s__unclassified	number.1 gg_id:00000 some annotation	0	0	0	0	0	0	0	1	246	0	0	0	0	0	0	0	0	0	0	0	0	0	0	0	0	0	0	0	0	211	0	0	0	67	0	0	0	0	0	0	0
518649	k__Bacteria	p__Proteobacteria	c__Gammaproteobacteria	o__Pasteurellales	f__Pasteurellaceae	g__unclassified	s__unclassified	number.1 gg_id:00000 some annotation	0	0	1	0	0	0	39	1	5	0	0	0	224	2	16	39	0	3	0	0	0	1	0	0	0	0	10	1	0	0	0	22	0	0	1	0	0	0	0	0	68
442949	k__Bacteria	p__Firmicutes	c__Clostridia	o__Clostridiales	f__Veillonellaceae	g__Veillonella	s__unclassified	number.1 gg_id:00000 some annotation	0	0	0	0	0	0	0	0	0	0	0	0	0	9	0	0	0	0	0	0	0	0	0	0	0	0	0	0	0	0	0	0	0	0	0	0	0	0	0	1	0
46867	k__Bacteria	p__Firmicutes	c__Clostridia	o__Clostridiales	f__Eubacteriaceae	g__Pseudoramibacter	s__Pseudoramibacter_alactolyticus	number.1 gg_id:00000 some annotation	0	0	0	0	0	0	0	0	0	0	0	1	0	0	1	0	0	0	0	2	0	0	0	0	0	1	0	0	0	0	0	0	0	0	0	1	0	0	0	0	0
142022	k__Bacteria	p__Cyanobacteria	c__Chloroplast	o__Cryptophyta	f__unclassified	g__unclassified	s__unclassified	number.1 gg_id:00000 some annotation	0	0	0	0	0	0	0	1	0	0	0	0	0	0	0	0	0	0	0	0	0	0	0	0	0	0	0	0	0	0	0	0	0	0	0	0	0	0	0	0	0
407576	k__Bacteria	p__Fusobacteria	c__Fusobacteria	o__Fusobacteriales	f__Fusobacteriaceae	g__Streptobacillus	s__unclassified	number.1 gg_id:00000 some annotation	0	0	0	0	0	1	0	0	0	0	0	0	1	0	32	0	0	0	9	3	0	0	0	0	0	0	0	0	0	0	0	0	0	0	2	0	0	0	0	0	50
362913	k__Bacteria	p__Acidobacteria	c__Acidobacteria	o__Acidobacteriales	f__Acidobacteriaceae	g__unclassified	s__unclassified	number.1 gg_id:00000 some annotation	0	0	0	0	0	0	0	0	0	0	0	0	0	0	0	0	0	0	0	0	0	0	0	0	0	0	0	0	1	0	0	0	0	0	0	0	0	0	0	0	0
73120	k__Bacteria	p__Firmicutes	c__Clostridia	o__Clostridiales	f__Lachnospiraceae	g__unclassified	s__unclassified	number.1 gg_id:00000 some annotation	0	0	0	0	0	0	0	0	0	0	0	0	0	0	0	0	0	0	0	0	0	0	0	0	0	0	0	0	0	0	0	0	0	0	0	1	0	0	0	0	0
484401	k__Bacteria	p__Bacteroidetes	c__Bacteroidia	o__Bacteroidales	f__Prevotellaceae	g__Prevotella	s__Prevotella_oris	number.1 gg_id:00000 some annotation	1	2	0	0	1	2	51	5	1	103	104	55	112	45	48	58	1	2	388	37	7796	44	30	2	0	1	36	4	71	0	1	1	23	2	23	225	3	0	0	7	9
470663	k__Bacteria	p__Firmicutes	c__Bacilli	o__Lactobacillales	f__Lactobacillaceae	g__Lactobacillus	s__unclassified	number.1 gg_id:00000 some annotation	0	0	0	0	0	0	0	0	0	0	0	0	0	0	0	0	0	0	0	0	0	0	0	0	0	0	0	0	0	0	0	0	0	0	0	0	0	0	0	0	0
71823	k__Bacteria	p__Proteobacteria	c__Gammaproteobacteria	o__Pseudomonadales	f__Pseudomonadaceae	g__Pseudomonas	s__Pseudomonas_nitroreducens	number.1 gg_id:00000 some annotation	0	0	0	0	0	0	0	0	0	0	0	0	0	0	0	0	0	0	0	0	0	0	0	0	1	0	0	0	0	0	0	0	0	0	0	0	0	0	0	0	0
29369	k__Bacteria	p__Proteobacteria	c__Gammaproteobacteria	o__Pasteurellales	f__Pasteurellaceae	g__unclassified	s__unclassified	number.1 gg_id:00000 some annotation	0	1	0	0	0	0	0	0	0	0	0	0	0	0	0	0	0	0	0	0	0	0	0	0	0	0	0	0	0	0	0	0	0	0	0	0	0	0	0	0	0
70804	k__Bacteria	p__Fusobacteria	c__Fusobacteria	o__Fusobacteriales	f__Fusobacteriaceae	g__Leptotrichia	s__unclassified	number.1 gg_id:00000 some annotation	0	0	0	0	0	0	0	0	0	0	1	0	0	0	0	0	1	0	0	0	0	0	0	1	0	0	0	0	0	0	0	0	0	0	0	0	0	0	0	0	0
175261	k__Bacteria	p__Firmicutes	c__Clostridia	o__Clostridiales	f__Lachnospiraceae	g__Eubacterium	s__unclassified	number.1 gg_id:00000 some annotation	0	0	0	0	0	0	0	0	0	0	0	0	0	0	0	0	0	0	0	0	0	0	0	0	0	0	0	0	0	0	0	0	0	1	0	0	0	0	0	0	0
237034	k__Bacteria	p__Fusobacteria	c__Fusobacteria	o__Fusobacteriales	f__Fusobacteriaceae	g__Leptotrichia	s__unclassified	number.1 gg_id:00000 some annotation	3	1	0	1	2	0	13	0	0	49	273	18	112	158	0	21	183	1382	0	3	109	0	135	76	142	1	0	4	2	1	12	0	399	0	67	857	60	293	28	1	885
1994	k__Bacteria	p__Bacteroidetes	c__Bacteroidia	o__Bacteroidales	f__Bacteroidaceae	g__Bacteroides	s__unclassified	number.1 gg_id:00000 some annotation	0	0	0	0	0	0	0	0	7	0	0	0	0	0	0	0	0	0	0	0	0	242	0	0	0	0	0	0	1	290	0	0	0	112	0	0	0	0	0	0	0
543491	k__Bacteria	p__Actinobacteria	c__Actinobacteria	o__Actinomycetales	f__Micrococcaceae	g__Rothia	s__unclassified	number.1 gg_id:00000 some annotation	0	0	0	9	0	0	2	53	21	0	1	5	0	9	3	0	0	11	0	0	0	0	0	0	0	2	0	0	0	0	1	0	0	0	0	0	0	0	1	2	1
463253	k__Bacteria	p__Proteobacteria	c__Betaproteobacteria	o__Rhodocyclales	f__Rhodocyclaceae	g__unclassified	s__unclassified	number.1 gg_id:00000 some annotation	0	0	0	0	0	0	0	0	1	0	0	0	0	0	0	0	0	0	0	0	0	0	0	0	0	0	0	0	0	0	0	0	0	0	0	0	0	0	0	0	0
59853	k__Bacteria	p__Actinobacteria	c__Actinobacteria	o__Actinomycetales	f__Microbacteriaceae	g__unclassified	s__unclassified	number.1 gg_id:00000 some annotation	0	0	0	0	1	1	0	0	7	0	0	0	0	0	0	0	0	0	0	0	0	0	0	0	0	0	0	0	0	0	0	0	0	0	0	0	0	0	0	0	0
2862	k__Bacteria	p__Planctomycetes	c__Planctomycea	o__Planctomycetales	f__Planctomycetaceae	g__Planctomyces	s__unclassified	number.1 gg_id:00000 some annotation	0	0	0	0	1	0	0	0	0	0	0	0	0	0	0	0	0	0	0	0	0	0	0	0	0	0	0	0	0	0	0	0	0	0	0	0	0	0	0	0	0
331408	k__Bacteria	p__Planctomycetes	c__Planctomycea	o__Planctomycetales	f__Planctomycetaceae	g__unclassified	s__unclassified	number.1 gg_id:00000 some annotation	0	0	0	0	0	0	0	0	0	0	0	0	0	0	0	0	0	0	0	0	0	3	0	0	0	0	0	0	0	0	0	0	0	0	0	0	0	0	0	0	0
317658	k__Bacteria	p__Actinobacteria	c__Actinobacteria	o__Actinomycetales	f__ACK-M1	g__unclassified	s__unclassified	number.1 gg_id:00000 some annotation	0	0	0	0	0	0	0	0	0	0	0	0	0	0	0	0	0	0	0	0	0	23	0	0	0	0	0	0	0	0	0	0	0	0	0	0	0	0	0	0	0
326977	k__Bacteria	p__Actinobacteria	c__Actinobacteria	o__Bifidobacteriales	f__Bifidobacteriaceae	g__Bifidobacterium	s__Bifidobacterium_adolescentis	number.1 gg_id:00000 some annotation	0	0	0	0	0	1	0	0	0	0	0	0	0	0	0	0	0	0	0	0	0	3	0	0	0	19	0	0	4	0	0	0	0	0	0	0	0	0	0	0	0
108001	k__Bacteria	p__Proteobacteria	c__Alphaproteobacteria	o__Sphingomonadales	f__Sphingomonadaceae	g__Sphingomonas	s__unclassified	number.1 gg_id:00000 some annotation	0	0	0	0	1	0	0	2	0	0	0	0	0	0	0	0	0	0	0	0	0	0	0	0	0	0	0	0	0	0	0	0	0	0	0	0	0	0	0	0	0
160679	k__Bacteria	p__Actinobacteria	c__Actinobacteria	o__Rubrobacterales	f__Rubrobacteraceae	g__Rubrobacter	s__Rubrobacter_xylanophilus	number.1 gg_id:00000 some annotation	0	0	0	0	0	0	0	0	33	0	0	0	0	0	0	0	0	0	0	1	0	29	1	0	0	0	0	0	1	0	0	0	0	142	0	0	0	0	0	0	0
29566	k__Bacteria	p__Fusobacteria	c__Fusobacteria	o__Fusobacteriales	f__Fusobacteriaceae	g__Sneathia	s__Leptotrichia_amnionii	number.1 gg_id:00000 some annotation	0	0	0	0	0	0	0	0	0	0	0	0	0	0	0	0	0	0	0	0	0	0	0	0	0	0	0	0	0	0	0	0	0	0	0	0	0	0	0	0	0
229150	k__Bacteria	p__Bacteroidetes	c__Bacteroidia	o__Bacteroidales	f__RikenellaceaeII	g__unclassified	s__unclassified	number.1 gg_id:00000 some annotation	0	0	0	0	0	0	0	0	0	0	0	0	0	0	0	0	0	0	0	0	0	0	0	0	0	0	0	0	0	0	0	0	0	0	0	0	0	0	0	0	0
143171	k__Bacteria	p__Actinobacteria	c__Actinobacteria	o__Bifidobacteriales	f__Bifidobacteriaceae	g__Alloscardovia	s__Alloscardovia_omnicolens	number.1 gg_id:00000 some annotation	0	0	0	0	0	0	0	0	0	0	0	0	0	2	0	0	0	0	0	0	0	0	0	0	0	0	0	0	0	0	0	0	0	0	0	0	0	0	0	0	0
362899	k__Bacteria	p__Firmicutes	c__Clostridia	o__Clostridiales	f__Veillonellaceae	g__unclassified	s__unclassified	number.1 gg_id:00000 some annotation	0	0	0	0	0	0	0	0	0	0	0	0	0	0	0	0	0	0	0	0	0	0	0	0	0	0	0	0	0	0	0	0	0	0	0	0	0	0	0	0	0
470243	k__Bacteria	p__Proteobacteria	c__Betaproteobacteria	o__Neisseriales	f__Neisseriaceae	g__unclassified	s__unclassified	number.1 gg_id:00000 some annotation	1	2	0	0	0	3	11	10	0	8	2	1	9	5	2	4	0	0	32	1	0	0	21	0	0	0	448	0	8	0	0	0	0	0	10	0	259	0	0	0	104
68350	k__Bacteria	p__Firmicutes	c__Clostridia	o__Clostridiales	f__unclassified	g__unclassified	s__unclassified	number.1 gg_id:00000 some annotation	0	0	0	0	0	0	0	1	0	0	0	3	0	5	0	0	0	0	0	16	3	0	0	0	0	0	0	0	0	0	0	0	0	0	5	0	0	0	0	0	0
176843	k__Bacteria	p__Bacteroidetes	c__Sphingobacteria	o__Sphingobacteriales	f__Flexibacteraceae	g__unclassified	s__unclassified	number.1 gg_id:00000 some annotation	0	0	0	0	0	0	0	0	0	0	0	0	0	0	0	0	0	0	0	0	0	0	0	0	0	0	0	0	0	0	0	0	0	0	0	0	0	0	0	0	0
282928	k__Bacteria	p__Bacteroidetes	c__Sphingobacteria	o__Sphingobacteriales	f__Sphingobacteriaceae	g__Pedobacter	s__unclassified	number.1 gg_id:00000 some annotation	0	0	0	0	0	0	0	0	0	0	0	0	0	0	0	0	0	0	0	0	0	0	0	0	0	0	0	0	0	0	0	0	0	0	0	0	0	0	0	0	0
529979	k__Bacteria	p__Tenericutes	c__Erysipelotrichi	o__Erysipelotrichales	f__Erysipelotrichaceae	g__Clostridium	s__unclassified	number.1 gg_id:00000 some annotation	0	0	0	0	0	0	0	0	2	0	0	0	0	0	0	0	0	0	0	0	0	0	0	0	0	0	0	0	0	4	0	0	0	0	0	0	0	0	0	0	0
175886	k__Bacteria	p__Proteobacteria	c__Epsilonproteobacteria	o__Campylobacterales	f__Campylobacteraceae	g__Campylobacter	s__unclassified	number.1 gg_id:00000 some annotation	0	0	0	0	0	0	0	0	0	0	0	0	0	1	0	0	0	0	1	0	0	0	10	0	0	0	0	0	0	0	0	0	0	0	0	0	0	0	0	0	1
194648	k__Bacteria	p__Firmicutes	c__Clostridia	o__Clostridiales	f__Lachnospiraceae	g__Blautia	s__unclassified	number.1 gg_id:00000 some annotation	0	0	0	0	0	0	0	0	0	0	0	0	0	0	0	0	0	0	0	0	0	0	0	0	0	0	0	0	0	0	0	0	0	82	0	0	0	0	0	0	0
144964	k__Bacteria	p__Proteobacteria	c__Alphaproteobacteria	o__Rhizobiales	f__Hyphomicrobiaceae	g__Hyphomicrobium	s__unclassified	number.1 gg_id:00000 some annotation	0	0	0	0	0	0	0	0	0	0	0	0	0	0	0	1	0	0	0	0	0	0	0	0	0	0	0	0	0	0	0	0	0	0	0	0	0	0	0	0	0
313166	k__Bacteria	p__Bacteroidetes	c__Bacteroidia	o__Bacteroidales	f__Bacteroidaceae	g__Bacteroides	s__Bacteroides_intestinalis	number.1 gg_id:00000 some annotation	0	0	0	0	0	0	0	0	0	0	0	0	0	0	0	0	0	0	0	0	0	0	0	0	0	0	0	0	3	0	0	0	0	0	0	0	0	0	0	0	0
88155	k__Bacteria	p__Spirochaetes	c__Leptospirae	o__Leptospirales	f__Leptospiraceae	g__unclassified	s__unclassified	number.1 gg_id:00000 some annotation	0	0	0	0	0	0	0	0	0	0	0	0	0	0	0	0	0	0	0	0	0	0	0	0	0	0	0	0	0	0	0	0	0	0	0	0	0	0	0	0	0
159711	k__Bacteria	p__Proteobacteria	c__Gammaproteobacteria	o__Pseudomonadales	f__Moraxellaceae	g__Acinetobacter	s__Acinetobacter_lwoffii	number.1 gg_id:00000 some annotation	0	0	0	0	0	0	0	1	0	1	0	0	0	0	0	0	0	0	0	0	0	0	0	0	0	0	0	0	2	0	0	0	0	0	0	0	0	0	0	0	0
103151	k__Bacteria	p__Actinobacteria	c__Actinobacteria	o__Actinomycetales	f__Actinomycetaceae	g__Actinomyces	s__unclassified	number.1 gg_id:00000 some annotation	0	0	0	0	0	0	0	0	0	0	0	0	0	0	0	0	0	0	0	0	0	0	29	0	0	0	0	0	0	0	0	0	0	0	3	0	4	0	0	0	0
380753	k__Bacteria	p__Firmicutes	c__Clostridia	o__Clostridiales	f__unclassified	g__unclassified	s__unclassified	number.1 gg_id:00000 some annotation	0	0	0	0	0	0	0	0	4	0	0	0	0	0	0	0	0	0	0	0	0	0	0	0	0	0	0	0	0	0	0	0	0	0	0	0	0	0	0	0	0
31235	k__Bacteria	p__Fusobacteria	c__Fusobacteria	o__Fusobacteriales	f__Fusobacteriaceae	g__Leptotrichia	s__unclassified	number.1 gg_id:00000 some annotation	0	0	1	1	0	0	0	0	0	0	0	0	1	11	26	191	482	3	0	0	1	0	1	4	154	0	0	0	1	0	3	0	99	0	0	27	0	655	0	22	0
234887	k__Bacteria	p__Firmicutes	c__Clostridia	o__Clostridiales	f__Lachnospiraceae	g__Lachnobacterium	s__unclassified	number.1 gg_id:00000 some annotation	0	0	0	0	0	0	0	0	7	0	0	0	0	0	0	0	0	0	0	0	0	0	0	0	0	0	0	0	0	0	0	0	0	0	0	0	0	0	0	0	0
183535	k__Bacteria	p__Bacteroidetes	c__Flavobacteria	o__Flavobacteriales	f__Flavobacteriaceae	g__unclassified	s__unclassified	number.1 gg_id:00000 some annotation	0	0	0	0	1	0	0	0	0	0	0	0	0	0	0	0	0	0	0	0	0	0	0	0	0	0	0	0	0	0	0	0	0	0	0	0	0	0	0	0	0
115230	k__Bacteria	p__Firmicutes	c__Bacilli	o__Lactobacillales	f__unclassified	g__unclassified	s__unclassified	number.1 gg_id:00000 some annotation	0	0	1	14	2	0	0	9	1	1	0	2	8	1	14	6	7	0	0	0	0	0	0	8	4	0	0	0	3	0	0	0	0	0	0	1	0	2	6	5	1
181971	k__Bacteria	p__Actinobacteria	c__Actinobacteria	o__Actinomycetales	f__unclassified	g__unclassified	s__unclassified	number.1 gg_id:00000 some annotation	0	0	0	0	0	0	0	0	0	0	0	0	0	0	0	0	0	0	0	0	0	0	0	0	0	0	0	0	0	0	0	0	0	0	0	0	0	0	0	0	0
107258	k__Bacteria	p__Firmicutes	c__Bacilli	o__Gemellales	f__Gemellaceae	g__Gemella	s__unclassified	number.1 gg_id:00000 some annotation	0	0	0	0	0	2	2	0	0	0	0	1	0	0	0	0	1	0	0	0	0	0	0	0	0	0	0	0	0	0	1	0	0	0	0	0	0	0	0	0	0
552026	k__Bacteria	p__Actinobacteria	c__Actinobacteria	o__Actinomycetales	f__Corynebacteriaceae	g__Corynebacterium	s__unclassified	number.1 gg_id:00000 some annotation	0	0	0	0	0	0	0	0	0	0	0	0	0	0	0	0	0	0	0	0	0	1	0	0	0	0	0	0	0	0	0	0	0	0	0	0	0	0	0	0	0
318833	k__Bacteria	p__Bacteroidetes	c__Bacteroidia	o__Bacteroidales	f__Bacteroidaceae	g__Bacteroides	s__Bacteroides_plebeius	number.1 gg_id:00000 some annotation	0	0	0	0	0	0	0	0	0	0	0	0	0	0	0	0	0	0	0	0	0	0	0	0	0	0	0	0	0	0	0	0	0	0	0	0	0	0	0	0	0
594164	k__Bacteria	p__Planctomycetes	c__Planctomycea	o__Gemmatales	f__Gemmataceae	g__Gemmata	s__unclassified	number.1 gg_id:00000 some annotation	0	0	1	0	1	0	0	0	0	0	0	0	0	0	0	0	0	0	0	0	0	0	0	0	0	0	0	0	0	0	0	0	0	0	0	0	0	0	0	0	0
332405	k__Bacteria	p__Firmicutes	c__Bacilli	o__Lactobacillales	f__Streptococcaceae	g__Streptococcus	s__unclassified	number.1 gg_id:00000 some annotation	99	720	11312	1421	755	18043	7336	1617	3150	6008	5380	2281	4066	4702	1029	2020	4060	130	28	46	87	826	543	6	285	299	15	4240	899	2	931	150	132	3	3336	4129	948	643	6921	96	7168
73894	k__Bacteria	p__Firmicutes	c__Clostridia	o__Clostridiales	f__Lachnospiraceae	g__unclassified	s__unclassified	number.1 gg_id:00000 some annotation	0	0	0	0	0	0	0	0	0	0	0	0	0	3	0	0	0	0	0	7	1	0	3	0	0	0	0	0	0	0	0	0	0	0	11	0	0	0	0	0	6
318540	k__Bacteria	p__Cyanobacteria	c__Chloroplast	o__Stramenopiles	f__unclassified	g__unclassified	s__unclassified	number.1 gg_id:00000 some annotation	0	0	0	0	0	0	0	0	0	0	0	0	0	0	0	0	0	0	0	0	0	0	0	0	0	0	0	0	0	0	0	0	0	0	0	0	0	0	0	0	0
541301	k__Bacteria	p__Bacteroidetes	c__Bacteroidia	o__Bacteroidales	f__Porphyromonadaceae	g__Parabacteroides	s__unclassified	number.1 gg_id:00000 some annotation	0	0	0	0	0	1	0	0	0	0	0	1	0	0	0	0	0	0	0	0	0	0	0	0	0	0	0	0	0	99	0	0	0	41	0	0	0	0	0	0	0
181489	k__Bacteria	p__Firmicutes	c__Clostridia	o__Clostridiales	f__Clostridiales_Family_XI._Incertae_Sedis	g__Parvimonas	s__Parvimonas_micra	number.1 gg_id:00000 some annotation	0	0	0	0	0	0	0	0	0	0	0	0	0	0	0	0	0	0	0	0	0	0	0	0	0	0	0	0	0	0	0	0	0	0	0	0	0	0	0	0	1
209361	k__Bacteria	p__Firmicutes	c__Clostridia	o__Clostridiales	f__Lachnospiraceae	g__Clostridium	s__unclassified	number.1 gg_id:00000 some annotation	0	0	0	0	0	0	0	0	24	0	0	0	0	0	0	0	0	0	0	0	0	0	0	0	0	0	0	0	0	0	0	0	0	0	0	0	0	0	0	0	0
3838	k__Bacteria	p__Spirochaetes	c__Spirochaetes	o__Spirochaetales	f__Spirochaetaceae	g__Treponema	s__Treponema_socranskii	number.1 gg_id:00000 some annotation	0	0	0	0	0	0	2	0	0	7	27	6	8	58	1	1	0	0	0	23	208	0	520	0	0	0	2	0	10	0	0	0	1	0	6	7	1	0	0	0	99
188761	k__Bacteria	p__Firmicutes	c__Clostridia	o__Clostridiales	f__Lachnospiraceae	g__Clostridium	s__Clostridium_scindens	number.1 gg_id:00000 some annotation	0	0	0	0	0	0	0	0	6	0	0	0	0	0	0	0	0	0	0	0	0	0	0	0	0	0	0	0	0	0	0	0	0	0	0	0	0	0	0	0	0
88701	k__Bacteria	p__Bacteroidetes	c__Bacteroidia	o__Bacteroidales	f__Prevotellaceae	g__Prevotella	s__Prevotella_multiformis	number.1 gg_id:00000 some annotation	0	0	0	2	0	0	27	0	9	0	0	46	4	128	2	107	1	1	2	4	1	0	60	0	0	0	0	1	0	0	0	0	0	0	48	37	3	0	39	0	1
574493	k__Bacteria	p__Firmicutes	c__Bacilli	o__Bacillales	f__Bacillaceae	g__unclassified	s__unclassified	number.1 gg_id:00000 some annotation	0	0	0	0	0	0	0	0	0	0	0	1	0	0	0	0	0	0	0	0	0	0	0	0	0	0	0	0	0	0	0	0	0	0	0	0	0	0	0	0	0
181573	k__Bacteria	p__Firmicutes	c__Clostridia	o__Clostridiales	f__Lachnospiraceae	g__Eubacterium	s__unclassified	number.1 gg_id:00000 some annotation	0	0	0	0	0	0	0	0	0	0	0	0	0	0	0	0	0	0	0	0	0	245	0	0	1	0	0	0	0	0	0	0	0	0	0	0	0	0	0	0	0
258691	k__Bacteria	p__Bacteroidetes	c__Bacteroidia	o__Bacteroidales	f__Bacteroidaceae	g__Bacteroides	s__Bacteroides_ovatus	number.1 gg_id:00000 some annotation	0	0	0	0	0	0	0	0	18	0	0	0	1	0	0	0	0	0	0	0	1	401	2	0	0	0	0	0	0	218	0	0	0	0	0	0	0	8	0	0	1
56599	k__Bacteria	p__Proteobacteria	c__Betaproteobacteria	o__Neisseriales	f__Neisseriaceae	g__unclassified	s__unclassified	number.1 gg_id:00000 some annotation	0	0	0	0	0	0	0	0	0	0	0	0	0	0	0	0	0	0	0	0	0	0	0	0	0	0	22	0	0	0	0	0	0	0	0	0	10	0	0	0	10
579761	k__Bacteria	p__Proteobacteria	c__Alphaproteobacteria	o__Rhizobiales	f__Hyphomicrobiaceae	g__Hyphomicrobium	s__unclassified	number.1 gg_id:00000 some annotation	0	0	0	0	0	0	0	0	3	0	0	0	0	0	0	0	0	0	0	0	0	0	0	0	0	0	0	0	0	0	0	0	0	0	0	0	0	0	0	0	0
494937	k__Bacteria	p__Firmicutes	c__Clostridia	o__Clostridiales	f__Clostridiales_Family_XI._Incertae_Sedis	g__Peptoniphilus	s__Peptoniphilus_asaccharolyticus	number.1 gg_id:00000 some annotation	0	0	0	0	0	0	0	0	0	0	0	0	0	0	0	0	0	0	0	0	0	0	0	1	0	0	0	0	0	0	0	0	0	0	0	0	0	0	0	0	0
110305	k__Bacteria	p__Actinobacteria	c__Actinobacteria	o__Actinomycetales	f__unclassified	g__unclassified	s__unclassified	number.1 gg_id:00000 some annotation	0	0	2	0	1	2	1	0	5	0	0	0	1	1	0	0	0	0	0	0	0	0	0	0	0	0	0	0	0	0	0	0	0	0	0	0	0	0	0	0	0
259614	k__Bacteria	p__Firmicutes	c__Clostridia	o__Clostridiales	f__Lachnospiraceae	g__unclassified	s__unclassified	number.1 gg_id:00000 some annotation	0	0	0	0	0	0	0	0	0	0	0	0	0	0	0	0	0	0	0	0	0	0	0	0	0	0	0	0	0	0	0	0	0	75	0	0	0	0	0	0	0
150546	k__Bacteria	p__Proteobacteria	c__Gammaproteobacteria	o__Pasteurellales	f__Pasteurellaceae	g__unclassified	s__unclassified	number.1 gg_id:00000 some annotation	0	0	0	0	0	0	0	0	0	0	0	0	0	0	0	0	0	0	0	0	0	0	0	0	1	0	0	0	0	0	0	0	0	0	0	0	0	0	0	0	0
161820	k__Bacteria	p__Proteobacteria	c__Gammaproteobacteria	o__Pseudomonadales	f__Pseudomonadaceae	g__Pseudomonas	s__Pseudomonas_alcaligenes	number.1 gg_id:00000 some annotation	0	0	0	0	0	0	0	0	0	0	0	0	0	0	0	0	0	0	0	0	0	0	0	0	0	0	0	0	0	0	0	0	0	19	0	1	0	0	0	0	0
191452	k__Bacteria	p__Firmicutes	c__Bacilli	o__Lactobacillales	f__Lactobacillaceae	g__Pediococcus	s__unclassified	number.1 gg_id:00000 some annotation	0	0	0	0	0	0	0	0	0	0	0	0	0	0	0	0	4	0	0	0	0	0	0	0	0	0	0	0	0	0	0	0	0	0	0	0	0	0	0	0	0
587796	k__Bacteria	p__Proteobacteria	c__Betaproteobacteria	o__Burkholderiales	f__unclassified	g__unclassified	s__unclassified	number.1 gg_id:00000 some annotation	0	0	0	0	0	0	0	0	0	0	0	0	0	0	0	0	0	0	0	0	0	0	0	0	0	0	0	0	0	0	0	0	0	0	0	0	0	0	0	0	0
589746	k__Bacteria	p__Firmicutes	c__Clostridia	o__Clostridiales	f__Clostridiales_Family_XIII._Incertae_Sedis	g__Eubacterium	s__unclassified	number.1 gg_id:00000 some annotation	0	0	6	0	0	0	19	0	0	55	31	1	9	0	0	65	3	13	6	7	20	0	1	8	0	0	5	0	2	0	6	0	43	0	6	0	0	238	0	0	56
260460	k__Bacteria	p__Bacteroidetes	c__Bacteroidia	o__Bacteroidales	f__RikenellaceaeII	g__unclassified	s__unclassified	number.1 gg_id:00000 some annotation	0	0	0	0	0	0	0	0	1	0	0	0	0	0	0	0	0	0	0	0	0	0	0	0	0	0	0	0	0	0	0	0	0	0	0	0	0	0	0	0	0
302844	k__Bacteria	p__Firmicutes	c__Clostridia	o__Clostridiales	f__Clostridiaceae	g__unclassified	s__unclassified	number.1 gg_id:00000 some annotation	0	0	0	0	0	0	0	0	0	0	0	0	0	0	0	0	0	0	0	0	0	20	0	0	0	0	0	0	0	0	0	0	0	0	0	0	0	0	0	0	0
140880	k__Bacteria	p__Proteobacteria	c__Gammaproteobacteria	o__Pseudomonadales	f__Pseudomonadaceae	g__Pseudomonas	s__unclassified	number.1 gg_id:00000 some annotation	0	0	0	0	0	0	0	0	0	0	0	2	0	0	0	0	0	0	0	0	0	0	0	0	0	0	0	0	0	0	0	0	0	0	0	0	0	0	0	0	0
158370	k__Bacteria	p__Proteobacteria	c__Alphaproteobacteria	o__Sphingomonadales	f__Sphingomonadaceae	g__Sphingomonas	s__unclassified	number.1 gg_id:00000 some annotation	0	0	0	0	0	0	0	0	0	0	0	0	0	0	0	0	0	0	0	0	0	0	0	0	0	0	0	0	0	0	0	0	0	0	0	0	0	0	0	0	0
88035	k__Bacteria	p__Bacteroidetes	c__Bacteroidia	o__Bacteroidales	f__Prevotellaceae	g__Prevotella	s__unclassified	number.1 gg_id:00000 some annotation	0	0	0	0	0	0	1	0	0	0	0	9	1	1073	1	13	1	0	4	2	4	0	59	0	0	0	0	0	0	0	0	0	0	0	18	6	1	0	0	0	0
181627	k__Bacteria	p__Bacteroidetes	c__Bacteroidia	o__Bacteroidales	f__Prevotellaceae	g__Prevotella	s__unclassified	number.1 gg_id:00000 some annotation	0	0	0	0	0	0	0	0	0	0	0	0	0	0	0	0	0	0	0	0	0	0	0	0	7	0	0	0	0	0	0	0	0	0	0	0	0	0	0	1	0
328410	k__Bacteria	p__Proteobacteria	c__Betaproteobacteria	o__Methylophilales	f__Methylophilaceae	g__Methylotenera	s__unclassified	number.1 gg_id:00000 some annotation	0	0	0	0	0	0	1	0	14	0	0	0	0	0	0	0	0	0	0	0	0	0	0	0	0	0	0	0	0	0	0	0	0	0	0	1	0	0	0	0	0
326744	k__Bacteria	p__Proteobacteria	c__Gammaproteobacteria	o__Aeromonadales	f__Aeromonadaceae	g__Tolumonas	s__unclassified	number.1 gg_id:00000 some annotation	0	0	0	0	0	0	0	0	0	0	0	0	0	0	0	1	0	0	0	0	0	0	0	0	0	0	0	0	0	0	0	0	0	0	0	0	0	0	0	0	0
586693	k__Bacteria	p__Bacteroidetes	c__Sphingobacteria	o__Sphingobacteriales	f__Chitinophagaceae	g__unclassified	s__unclassified	number.1 gg_id:00000 some annotation	0	0	0	0	0	0	0	0	0	0	0	0	0	0	0	0	0	0	0	0	0	0	0	0	0	0	0	0	0	0	0	0	0	0	0	0	0	0	0	0	0
99211	k__Bacteria	p__Actinobacteria	c__Actinobacteria	o__Actinomycetales	f__Intrasporangiaceae	g__Janibacter	s__unclassified	number.1 gg_id:00000 some annotation	0	0	0	0	0	0	0	0	2	0	0	0	0	0	0	0	0	0	0	0	0	0	0	0	0	0	0	0	0	54	0	0	0	110	0	0	0	0	0	0	0
46278	k__Bacteria	p__Proteobacteria	c__Gammaproteobacteria	o__Pasteurellales	f__Pasteurellaceae	g__Haemophilus	s__Haemophilus_influenzae	number.1 gg_id:00000 some annotation	0	0	55	0	18	0	2	0	0	15	14	0	0	0	0	0	0	0	3	0	0	0	0	1	3	0	1	0	0	0	0	0	0	0	0	2	0	0	1	0	171
52106	k__Bacteria	p__Firmicutes	c__Clostridia	o__Clostridiales	f__Lachnospiraceae	g__unclassified	s__unclassified	number.1 gg_id:00000 some annotation	0	0	0	0	0	0	0	0	0	0	0	0	0	0	0	0	0	0	1	5	0	0	2	0	0	0	0	0	0	0	0	0	0	0	0	0	0	0	0	0	0
17538	k__Bacteria	p__Proteobacteria	c__Gammaproteobacteria	o__Pasteurellales	f__Pasteurellaceae	g__unclassified	s__unclassified	number.1 gg_id:00000 some annotation	1	7	0	1	19	58	155	74	800	3	4	0	2	73	57	555	0	2	102	0	0	1	2	0	2	1	1	17	47	0	37	1534	93	0	2	10	383	0	3	0	5
211308	k__Bacteria	p__Tenericutes	c__Mollicutes	o__RF39	f__unclassified	g__unclassified	s__unclassified	number.1 gg_id:00000 some annotation	0	0	0	0	0	0	0	0	0	0	0	0	0	0	0	0	0	0	0	0	0	0	0	0	0	0	0	0	0	0	0	0	0	0	0	0	0	0	0	0	0
242450	k__Bacteria	p__Actinobacteria	c__Actinobacteria	o__Actinomycetales	f__Microbacteriaceae	g__Pseudoclavibacter	s__unclassified	number.1 gg_id:00000 some annotation	0	0	0	0	0	0	0	0	0	0	0	0	0	0	0	0	0	0	0	0	0	0	0	0	0	0	0	0	0	0	0	0	0	0	0	0	0	0	0	0	0
101445	k__Bacteria	p__Proteobacteria	c__Betaproteobacteria	o__unclassified	f__unclassified	g__unclassified	s__unclassified	number.1 gg_id:00000 some annotation	0	0	0	0	0	0	0	0	11	0	0	0	0	0	0	0	0	0	0	0	0	0	0	0	0	0	0	0	0	0	0	0	0	0	0	0	0	0	0	0	0
268592	k__Bacteria	p__Firmicutes	c__Bacilli	o__Lactobacillales	f__Lactobacillaceae	g__Lactobacillus	s__Lactobacillus_zeae	number.1 gg_id:00000 some annotation	0	0	0	0	0	0	0	0	0	0	0	0	0	0	0	0	0	0	0	0	0	0	0	0	0	3	0	0	0	0	0	0	0	0	0	0	0	0	0	0	0
249999	k__Bacteria	p__Actinobacteria	c__Actinobacteria	o__Actinomycetales	f__Microbacteriaceae	g__unclassified	s__unclassified	number.1 gg_id:00000 some annotation	0	0	0	0	0	0	0	0	0	0	0	0	0	0	0	0	0	0	0	0	0	0	0	0	0	0	0	0	0	0	0	0	0	0	0	0	0	0	0	0	0
301943	k__Bacteria	p__Firmicutes	c__Clostridia	o__Clostridiales	f__Ruminococcaceae	g__Oscillospira	s__unclassified	number.1 gg_id:00000 some annotation	0	0	0	0	0	0	0	0	14	0	0	0	0	0	0	0	0	0	0	0	0	0	0	0	0	0	0	0	0	0	0	0	0	0	0	0	0	0	0	0	0
451218	k__Bacteria	p__Firmicutes	c__Clostridia	o__Clostridiales	f__Clostridiales_Family_XIII._Incertae_Sedis	g__Eubacterium	s__unclassified	number.1 gg_id:00000 some annotation	0	0	0	0	0	0	0	0	0	0	0	0	0	0	0	0	0	0	0	0	3	0	0	0	0	0	0	0	0	0	0	0	0	0	1	1	0	0	0	0	0
199553	k__Bacteria	p__Proteobacteria	c__Alphaproteobacteria	o__Caulobacterales	f__Caulobacteraceae	g__Phenylobacterium	s__unclassified	number.1 gg_id:00000 some annotation	0	0	0	0	0	0	1	0	0	0	0	0	0	0	0	0	0	0	0	0	0	0	0	0	0	0	0	0	0	0	0	0	0	0	0	0	0	0	0	0	0
510246	k__Bacteria	p__Firmicutes	c__Bacilli	o__Lactobacillales	f__Lactobacillaceae	g__Lactobacillus	s__unclassified	number.1 gg_id:00000 some annotation	0	0	0	0	0	0	0	0	0	0	0	0	0	0	0	0	0	0	0	0	0	0	0	0	0	0	0	0	0	0	0	0	0	0	0	0	0	0	0	0	0
175416	k__Bacteria	p__Firmicutes	c__Clostridia	o__Clostridiales	f__Lachnospiraceae	g__unclassified	s__unclassified	number.1 gg_id:00000 some annotation	0	0	0	0	0	0	0	0	14	0	0	0	0	0	0	0	0	0	0	0	0	0	0	0	0	0	0	0	0	0	0	0	0	0	0	0	0	0	0	0	0
94166	k__Bacteria	p__Proteobacteria	c__Gammaproteobacteria	o__Pasteurellales	f__Pasteurellaceae	g__Haemophilus	s__Haemophilus_parainfluenzae	number.1 gg_id:00000 some annotation	31	36	30	11	13	0	9	17	13	8	3	0	3	0	14	4	1	18	0	0	0	4	0	0	7	0	0	29	6	0	5	1	6	0	1	19	0	0	24	6	0
211234	k__Bacteria	p__Firmicutes	c__Clostridia	o__Clostridiales	f__Lachnospiraceae	g__unclassified	s__unclassified	number.1 gg_id:00000 some annotation	0	0	0	0	0	0	0	0	18	0	0	0	0	0	0	0	0	0	0	0	0	0	0	0	0	0	0	0	0	0	0	0	0	0	0	0	0	0	0	0	0
102382	k__Bacteria	p__Proteobacteria	c__Betaproteobacteria	o__Burkholderiales	f__Oxalobacteraceae	g__Massilia	s__Massilia_timonae	number.1 gg_id:00000 some annotation	0	0	0	0	0	0	0	0	0	0	0	0	0	0	0	0	1	0	0	0	0	0	0	0	0	0	0	0	0	0	0	0	0	192	0	0	0	0	0	0	0
333341	k__Bacteria	p__Firmicutes	c__Clostridia	o__Clostridiales	f__Lachnospiraceae	g__unclassified	s__unclassified	number.1 gg_id:00000 some annotation	0	0	0	0	0	0	0	0	15	0	0	0	0	0	0	0	0	0	0	0	0	0	0	0	0	0	0	0	0	0	0	0	0	0	0	0	0	0	0	0	0
586238	k__Bacteria	p__Firmicutes	c__Bacilli	o__Bacillales	f__Staphylococcaceae	g__Staphylococcus	s__unclassified	number.1 gg_id:00000 some annotation	0	0	0	0	1	0	0	0	9	0	0	0	0	0	0	0	0	0	0	0	0	1	0	0	0	0	0	0	0	0	0	0	0	0	0	0	0	0	0	0	0
365852	k__Bacteria	p__Actinobacteria	c__Actinobacteria	o__Actinomycetales	f__Mycobacteriaceae	g__Mycobacterium	s__unclassified	number.1 gg_id:00000 some annotation	0	0	0	0	0	0	0	0	2	0	0	0	0	0	0	0	0	0	0	0	0	0	0	0	0	0	0	0	0	0	0	0	0	0	0	0	0	0	0	0	0
470429	k__Bacteria	p__Fusobacteria	c__Fusobacteria	o__Fusobacteriales	f__Fusobacteriaceae	g__Fusobacterium	s__unclassified	number.1 gg_id:00000 some annotation	0	0	0	0	0	0	0	0	0	0	0	0	0	0	0	0	0	0	0	0	0	0	1	1	0	0	0	0	0	235	0	0	0	188	0	0	0	0	0	0	0
70346	k__Bacteria	p__Bacteroidetes	c__Sphingobacteria	o__Sphingobacteriales	f__Chitinophagaceae	g__unclassified	s__unclassified	number.1 gg_id:00000 some annotation	0	0	0	0	0	0	0	0	0	0	0	0	0	0	0	0	0	0	0	0	0	0	0	0	1	0	0	0	0	0	0	0	0	0	0	0	0	0	0	0	0
49406	k__Bacteria	p__Firmicutes	c__Clostridia	o__Clostridiales	f__Lachnospiraceae	g__unclassified	s__unclassified	number.1 gg_id:00000 some annotation	0	0	0	0	0	0	0	0	9	0	0	0	0	0	0	0	0	0	0	0	0	0	0	0	0	0	0	0	0	0	0	0	0	0	0	0	0	0	0	0	0
252936	k__Bacteria	p__Firmicutes	c__Clostridia	o__Clostridiales	f__Veillonellaceae	g__Selenomonas	s__unclassified	number.1 gg_id:00000 some annotation	0	0	0	0	0	0	0	0	0	0	0	0	0	8	0	6	0	0	62	161	0	0	54	0	0	0	0	0	0	0	0	0	0	0	0	0	20	0	0	0	9
252934	k__Bacteria	p__Firmicutes	c__Clostridia	o__Clostridiales	f__Veillonellaceae	g__Selenomonas	s__unclassified	number.1 gg_id:00000 some annotation	0	0	0	0	0	0	0	0	0	0	0	0	0	0	0	0	0	0	0	1	0	0	0	0	0	0	0	0	0	0	0	0	0	0	0	0	0	0	0	0	0
9753	k__Bacteria	p__Proteobacteria	c__Gammaproteobacteria	o__Enterobacteriales	f__Enterobacteriaceae	g__unclassified	s__unclassified	number.1 gg_id:00000 some annotation	0	0	0	0	0	0	0	0	0	0	0	0	0	0	0	0	0	0	0	0	0	0	0	0	0	0	0	0	0	1	0	0	0	0	0	0	0	0	0	0	0
95168	k__Bacteria	p__Spirochaetes	c__Spirochaetes	o__Spirochaetales	f__Spirochaetaceae	g__Treponema	s__Treponema_lecithinolyticum	number.1 gg_id:00000 some annotation	0	0	0	0	0	0	0	1	0	0	0	0	0	6	1	0	0	0	0	648	492	156	0	0	0	0	0	0	0	0	0	0	0	0	20	4	0	0	0	0	0
416992	k__Bacteria	p__Firmicutes	c__Bacilli	o__Lactobacillales	f__Streptococcaceae	g__Streptococcus	s__unclassified	number.1 gg_id:00000 some annotation	0	0	0	0	0	0	0	0	0	0	0	0	0	2	0	0	0	0	0	0	0	0	0	0	0	0	0	0	0	0	0	0	0	0	0	0	0	0	0	0	0
232036	k__Bacteria	p__Firmicutes	c__Clostridia	o__Clostridiales	f__Ruminococcaceae	g__Eubacterium	s__unclassified	number.1 gg_id:00000 some annotation	0	0	0	0	0	0	0	0	0	0	0	0	0	0	0	0	0	0	0	0	0	0	0	0	0	0	0	0	0	98	0	0	0	0	2	0	0	0	0	0	0
258280	k__Bacteria	p__Firmicutes	c__Clostridia	o__Clostridiales	f__Lachnospiraceae	g__unclassified	s__unclassified	number.1 gg_id:00000 some annotation	0	0	0	0	0	0	0	0	0	0	0	0	0	0	0	0	0	0	0	0	0	0	0	0	0	0	0	0	0	0	0	0	0	0	0	0	0	0	0	0	0
268604	k__Bacteria	p__Bacteroidetes	c__Bacteroidia	o__Bacteroidales	f__Prevotellaceae	g__Prevotella	s__unclassified	number.1 gg_id:00000 some annotation	0	0	0	0	0	0	0	0	0	0	0	0	0	0	0	0	0	0	0	0	0	0	0	0	0	0	0	0	0	0	0	0	0	0	0	0	0	1	0	0	0
333695	k__Bacteria	p__Bacteroidetes	c__Bacteroidia	o__Bacteroidales	f__RikenellaceaeII	g__unclassified	s__unclassified	number.1 gg_id:00000 some annotation	0	0	0	1	0	0	0	0	197	0	1	0	0	0	2	0	0	0	1	0	5	118	1	0	0	5	0	0	1	79	0	0	0	581	1	0	0	8	0	0	0
534193	k__Bacteria	p__Firmicutes	c__Bacilli	o__Lactobacillales	f__Streptococcaceae	g__Streptococcus	s__Streptococcus_anginosus	number.1 gg_id:00000 some annotation	0	0	0	0	0	0	1	1	0	0	0	10	1	16	29	0	0	0	5	3	45	0	9	0	0	2	0	0	14	0	0	0	2	0	14	2	0	0	1	0	2
538912	k__Bacteria	p__Bacteroidetes	c__Flavobacteria	o__Flavobacteriales	f__Flavobacteriaceae	g__Flavobacterium	s__unclassified	number.1 gg_id:00000 some annotation	0	0	0	0	2	0	0	0	3	0	0	0	0	0	0	0	0	0	0	0	0	0	0	0	0	0	0	0	0	0	0	0	0	0	0	0	0	0	0	0	0
157801	k__Bacteria	p__Proteobacteria	c__Alphaproteobacteria	o__Sphingomonadales	f__Sphingomonadaceae	g__Sphingobium	s__unclassified	number.1 gg_id:00000 some annotation	0	0	0	0	0	0	0	0	0	0	0	0	0	0	0	2	0	0	0	0	0	0	0	0	0	0	0	0	5	0	0	0	0	0	0	0	0	0	0	0	0
263697	k__Bacteria	p__Firmicutes	c__Clostridia	o__Clostridiales	f__Lachnospiraceae	g__unclassified	s__unclassified	number.1 gg_id:00000 some annotation	0	0	0	0	0	0	0	0	0	0	0	0	0	0	0	0	0	0	0	0	0	0	0	0	0	0	0	0	0	0	0	0	0	0	0	0	0	0	0	0	0
269930	k__Bacteria	p__Proteobacteria	c__Gammaproteobacteria	o__Pseudomonadales	f__Pseudomonadaceae	g__Pseudomonas	s__unclassified	number.1 gg_id:00000 some annotation	0	0	0	0	0	0	0	1	0	0	0	0	0	0	0	0	0	0	0	0	0	63	0	0	0	1	0	0	0	0	0	0	0	0	0	0	0	0	0	0	0
129426	k__Bacteria	p__Tenericutes	c__Erysipelotrichi	o__Erysipelotrichales	f__Erysipelotrichaceae	g__Sharpea	s__unclassified	number.1 gg_id:00000 some annotation	0	0	0	0	0	0	0	0	0	0	0	0	1	0	0	0	0	0	133	12	84	0	0	0	0	0	0	0	2	1	0	0	0	0	7	3	0	0	0	0	0
299741	k__Bacteria	p__Firmicutes	c__Clostridia	o__Clostridiales	f__Lachnospiraceae	g__unclassified	s__unclassified	number.1 gg_id:00000 some annotation	0	0	0	0	0	0	0	0	0	0	0	0	0	0	0	0	0	0	0	0	0	0	0	0	0	0	0	0	0	0	0	0	0	69	0	0	0	0	0	0	0
38741	k__Bacteria	p__Spirochaetes	c__Spirochaetes	o__Spirochaetales	f__Spirochaetaceae	g__Treponema	s__Treponema_lecithinolyticum	number.1 gg_id:00000 some annotation	0	0	0	0	0	0	0	0	0	0	0	5	0	13	0	0	0	0	0	0	0	0	0	0	0	0	0	0	0	0	0	0	0	0	1	0	0	0	0	0	0
339067	k__Bacteria	p__Firmicutes	c__Clostridia	o__Clostridiales	f__Ruminococcaceae	g__unclassified	s__unclassified	number.1 gg_id:00000 some annotation	0	0	0	0	0	0	0	0	0	0	0	0	0	0	0	0	0	0	0	0	0	0	0	0	0	0	0	0	0	106	0	0	0	0	0	0	0	0	0	0	0
347702	k__Bacteria	p__Proteobacteria	c__Betaproteobacteria	o__Burkholderiales	f__Comamonadaceae	g__unclassified	s__unclassified	number.1 gg_id:00000 some annotation	0	0	0	0	0	0	0	0	0	0	0	0	0	0	0	2	0	0	0	0	0	0	0	0	0	0	0	0	0	0	0	0	0	0	0	0	0	0	0	0	0
68340	k__Bacteria	p__Firmicutes	c__Clostridia	o__Clostridiales	f__Peptococcaceae	g__Peptococcus	s__unclassified	number.1 gg_id:00000 some annotation	0	0	0	0	0	0	2	0	0	11	40	0	0	1	2	0	0	0	1	37	0	0	1	0	0	0	39	0	0	0	2	0	0	0	18	0	0	0	0	0	37
137454	k__Bacteria	p__Actinobacteria	c__Actinobacteria	o__Actinomycetales	f__Corynebacteriaceae	g__Corynebacterium	s__unclassified	number.1 gg_id:00000 some annotation	0	0	1	0	0	0	0	0	0	0	0	0	0	0	0	0	0	0	0	0	0	69	0	0	0	0	0	0	0	0	0	0	0	0	0	0	0	0	0	0	0
89770	k__Bacteria	p__Firmicutes	c__Clostridia	o__Clostridiales	f__Peptostreptococcaceae	g__Peptostreptococcus	s__unclassified	number.1 gg_id:00000 some annotation	0	0	0	0	0	0	0	0	0	0	0	0	0	0	0	0	0	0	0	0	0	0	0	0	0	0	0	0	0	0	0	0	0	0	0	0	0	0	0	0	0
529964	k__Bacteria	p__Acidobacteria	c__Solibacteres	o__Solibacterales	f__Solibacteraceae	g__Candidatus_Solibacter	s__unclassified	number.1 gg_id:00000 some annotation	0	0	0	0	0	0	0	0	16	0	0	0	0	0	0	0	0	0	0	0	0	0	0	0	0	0	0	0	0	0	0	0	0	0	0	0	0	0	0	0	0
470213	k__Bacteria	p__Actinobacteria	c__Actinobacteria	o__Actinomycetales	f__Corynebacteriaceae	g__Corynebacterium	s__unclassified	number.1 gg_id:00000 some annotation	0	0	0	5	123	0	14	6	13	3	2	1	47	14	53	19	8	2	0	0	3	198	7994	1	3	0	0	0	403	0	1	1	6	1	0	4	11678	0	0	0	2
5508	k__Bacteria	p__Proteobacteria	c__Alphaproteobacteria	o__Caulobacterales	f__Caulobacteraceae	g__Phenylobacterium	s__unclassified	number.1 gg_id:00000 some annotation	0	0	0	0	0	0	0	0	0	0	0	0	0	0	0	0	0	0	0	0	0	0	0	0	0	0	0	0	0	87	2	0	0	0	0	0	1	0	0	0	0
442151	k__Bacteria	p__Bacteroidetes	c__Bacteroidia	o__Bacteroidales	f__RikenellaceaeII	g__unclassified	s__unclassified	number.1 gg_id:00000 some annotation	0	0	0	0	0	0	0	0	0	0	0	0	0	0	0	0	0	0	0	0	0	0	0	0	0	0	0	0	0	0	0	0	0	0	0	0	0	3	0	0	0
165397	k__Bacteria	p__Firmicutes	c__Clostridia	o__Clostridiales	f__Lachnospiraceae	g__unclassified	s__unclassified	number.1 gg_id:00000 some annotation	0	0	0	0	0	0	0	0	0	0	0	0	0	0	0	0	0	0	0	0	0	0	0	0	0	0	0	0	0	0	0	0	0	0	0	0	0	0	0	0	0
50716	k__Bacteria	p__Firmicutes	c__Bacilli	o__unclassified	f__unclassified	g__unclassified	s__unclassified	number.1 gg_id:00000 some annotation	0	0	0	0	0	0	0	0	0	0	0	0	1	0	1	0	0	0	0	0	0	0	0	0	0	0	0	0	0	0	0	0	0	0	0	0	0	0	0	0	0
332569	k__Bacteria	p__Proteobacteria	c__Betaproteobacteria	o__Burkholderiales	f__Comamonadaceae	g__unclassified	s__unclassified	number.1 gg_id:00000 some annotation	0	0	0	0	0	0	0	0	0	0	0	0	0	0	0	0	0	0	0	0	0	3	0	0	0	0	0	0	0	0	0	0	0	0	0	0	0	0	0	0	0
264158	k__Bacteria	p__Proteobacteria	c__Gammaproteobacteria	o__Xanthomonadales	f__Xanthomonadaceae	g__Dokdonella	s__unclassified	number.1 gg_id:00000 some annotation	0	0	0	0	0	0	0	0	8	0	0	0	0	0	0	0	0	0	0	0	0	0	0	0	0	0	0	0	0	0	0	0	0	0	0	0	0	0	0	0	0
144643	k__Bacteria	p__Firmicutes	c__Bacilli	o__Lactobacillales	f__Streptococcaceae	g__Streptococcus	s__unclassified	number.1 gg_id:00000 some annotation	0	4	4	4	0	1	1	0	0	0	0	5	1	15	4	0	4	0	0	0	0	0	0	0	1	3	0	0	0	0	0	0	0	0	0	8	0	0	0	0	0
229527	k__Bacteria	p__Firmicutes	c__Clostridia	o__Clostridiales	f__Lachnospiraceae	g__unclassified	s__unclassified	number.1 gg_id:00000 some annotation	0	0	0	0	0	0	0	0	17	0	0	0	0	0	0	0	0	0	0	0	0	0	0	0	0	0	0	0	0	0	0	0	0	0	0	0	0	0	0	0	0
189827	k__Bacteria	p__Firmicutes	c__Clostridia	o__Clostridiales	f__Lachnospiraceae	g__Blautia	s__unclassified	number.1 gg_id:00000 some annotation	0	0	0	0	0	0	0	0	1	0	0	0	0	0	0	0	0	0	0	0	0	0	0	0	0	0	0	0	0	0	0	0	0	437	0	0	1	0	0	0	0
365319	k__Bacteria	p__Firmicutes	c__Clostridia	o__Clostridiales	f__Lachnospiraceae	g__unclassified	s__unclassified	number.1 gg_id:00000 some annotation	0	0	0	0	0	0	0	0	0	0	0	0	0	0	0	0	0	0	0	0	0	0	0	0	0	0	0	0	0	0	0	0	0	0	0	0	0	0	0	0	0
174693	k__Bacteria	p__Proteobacteria	c__Betaproteobacteria	o__Burkholderiales	f__Comamonadaceae	g__Comamonas	s__unclassified	number.1 gg_id:00000 some annotation	0	0	0	0	0	0	0	0	0	0	0	0	0	0	0	0	0	0	0	0	0	0	0	0	0	0	0	0	0	0	0	0	0	0	0	0	0	0	0	0	0
111824	k__Bacteria	p__Proteobacteria	c__Betaproteobacteria	o__Burkholderiales	f__Burkholderiaceae	g__Burkholderia	s__unclassified	number.1 gg_id:00000 some annotation	0	0	0	0	0	0	0	1	0	0	0	0	0	0	0	0	0	0	0	0	0	0	0	0	0	0	0	0	0	0	0	0	0	0	0	0	0	0	0	0	0
532556	k__Bacteria	p__Tenericutes	c__Erysipelotrichi	o__Erysipelotrichales	f__Erysipelotrichaceae	g__Bulleidia	s__Bulleidia_extructa	number.1 gg_id:00000 some annotation	0	0	0	0	0	0	0	0	0	0	0	2	0	4	0	0	0	0	1	2	0	0	0	0	0	0	0	0	0	0	0	0	0	0	1	0	0	0	0	0	0
492389	k__Bacteria	p__Actinobacteria	c__Actinobacteria	o__Actinomycetales	f__Actinomycetaceae	g__Actinomyces	s__unclassified	number.1 gg_id:00000 some annotation	0	0	0	0	0	0	1	0	0	0	0	0	5	0	0	0	0	0	0	0	0	0	251	0	0	0	0	0	0	0	0	0	0	0	7	0	58	0	0	0	93
229452	k__Bacteria	p__Firmicutes	c__Clostridia	o__Clostridiales	f__Catabacteriaceae	g__unclassified	s__unclassified	number.1 gg_id:00000 some annotation	0	0	0	0	0	0	0	0	9	0	0	0	0	0	0	0	0	0	0	0	0	0	0	0	0	0	0	0	0	0	0	0	0	0	0	0	0	0	0	0	0
178486	k__Bacteria	p__Firmicutes	c__Clostridia	o__Clostridiales	f__Catabacteriaceae	g__unclassified	s__unclassified	number.1 gg_id:00000 some annotation	0	0	0	0	0	0	0	0	0	0	0	0	0	0	0	0	0	0	0	0	0	0	0	0	0	0	0	0	0	111	0	0	0	0	0	0	0	0	0	0	0
15298	k__Bacteria	p__Firmicutes	c__Bacilli	o__Lactobacillales	f__unclassified	g__unclassified	s__unclassified	number.1 gg_id:00000 some annotation	0	0	0	0	0	0	0	0	0	0	0	0	0	0	0	0	0	0	0	0	0	0	0	0	0	0	0	0	0	0	0	0	0	0	0	0	0	0	0	0	0
272387	k__Bacteria	p__Proteobacteria	c__Gammaproteobacteria	o__Pseudomonadales	f__Pseudomonadaceae	g__Pseudomonas	s__unclassified	number.1 gg_id:00000 some annotation	0	0	0	0	0	0	0	0	0	0	0	0	0	0	0	0	0	0	0	0	0	0	0	0	0	0	0	0	0	0	0	0	0	1	0	0	0	0	0	0	0
573135	k__Bacteria	p__Proteobacteria	c__Alphaproteobacteria	o__Rhizobiales	f__Bradyrhizobiaceae	g__Bradyrhizobium	s__unclassified	number.1 gg_id:00000 some annotation	0	0	0	0	0	0	0	0	0	0	0	0	0	0	0	0	0	0	0	0	0	0	0	0	0	0	0	0	0	51	0	0	0	0	0	0	0	0	0	0	0
590182	k__Bacteria	p__Proteobacteria	c__Alphaproteobacteria	o__Sphingomonadales	f__Sphingomonadaceae	g__Sphingomonas	s__unclassified	number.1 gg_id:00000 some annotation	0	0	0	0	0	0	0	0	0	0	0	0	0	0	0	0	0	0	0	0	0	0	0	0	0	0	0	0	0	0	0	0	0	0	0	0	0	0	0	0	0
15059	k__Bacteria	p__Firmicutes	c__Bacilli	o__unclassified	f__unclassified	g__unclassified	s__unclassified	number.1 gg_id:00000 some annotation	0	0	0	2	1	1	4	3	1	0	0	2	0	0	2	0	0	0	0	0	0	0	0	0	2	0	0	0	2	0	0	1	0	0	0	0	1	2	0	2	0
15054	k__Bacteria	p__Firmicutes	c__Bacilli	o__Lactobacillales	f__Carnobacteriaceae	g__Granulicatella	s__unclassified	number.1 gg_id:00000 some annotation	0	0	6	0	5	3	240	0	14	2	0	0	15	36	24	138	0	3	7	0	0	74	11	0	84	0	0	2	0	1	0	316	5	0	5	1	2	0	0	30	0
58301	k__Bacteria	p__Actinobacteria	c__Actinobacteria	o__Actinomycetales	f__Micrococcaceae	g__Rothia	s__Rothia_dentocariosa	number.1 gg_id:00000 some annotation	2	23	196	2	199	196	184	123	359	8	10	257	59	110	32	480	194	5	1	0	0	0	15	0	0	10	0	0	62	0	4	2	0	1	0	215	1140	0	7	1	0
15053	k__Bacteria	p__Firmicutes	c__Bacilli	o__Lactobacillales	f__Aerococcaceae	g__Facklamia	s__unclassified	number.1 gg_id:00000 some annotation	0	0	0	0	0	0	0	0	0	0	0	0	0	0	0	0	0	0	0	0	0	0	1	0	0	0	0	0	0	0	0	0	0	0	0	0	0	0	0	0	0
262838	k__Bacteria	p__Proteobacteria	c__Gammaproteobacteria	o__Enterobacteriales	f__Enterobacteriaceae	g__Serratia	s__Serratia_marcescens	number.1 gg_id:00000 some annotation	0	0	0	0	0	0	0	0	0	0	0	0	0	0	0	0	0	0	0	0	0	0	0	0	0	0	0	0	0	0	0	0	0	0	0	0	0	0	1	0	0
50139	k__Bacteria	p__Proteobacteria	c__Betaproteobacteria	o__Burkholderiales	f__Comamonadaceae	g__unclassified	s__unclassified	number.1 gg_id:00000 some annotation	0	0	0	0	0	0	0	0	0	0	0	0	0	0	0	0	0	0	0	0	0	0	0	0	0	0	0	0	0	0	0	0	0	0	0	0	0	0	0	0	0
203232	k__Bacteria	p__Proteobacteria	c__Gammaproteobacteria	o__Enterobacteriales	f__Enterobacteriaceae	g__unclassified	s__unclassified	number.1 gg_id:00000 some annotation	0	0	0	0	0	0	0	0	0	0	0	0	0	0	0	0	0	0	0	0	0	1	0	0	0	0	0	0	0	0	0	0	0	0	0	0	0	0	0	0	0
130407	k__Bacteria	p__Firmicutes	c__Clostridia	o__Clostridiales	f__Lachnospiraceae	g__unclassified	s__unclassified	number.1 gg_id:00000 some annotation	0	0	0	0	0	0	0	0	8	0	0	0	0	0	0	0	0	0	0	0	0	0	0	0	0	0	0	0	0	0	0	0	0	0	0	0	0	0	0	0	0
228077	k__Bacteria	p__Proteobacteria	c__Betaproteobacteria	o__Burkholderiales	f__Comamonadaceae	g__Limnohabitans	s__unclassified	number.1 gg_id:00000 some annotation	0	0	0	0	0	0	1	0	0	0	0	0	0	0	0	0	0	0	0	0	0	0	0	0	0	0	0	0	0	0	0	0	0	0	0	0	0	0	0	0	0
223237	k__Bacteria	p__Proteobacteria	c__Alphaproteobacteria	o__unclassified	f__unclassified	g__unclassified	s__unclassified	number.1 gg_id:00000 some annotation	0	0	0	0	0	0	0	0	0	0	0	0	0	0	0	0	0	0	0	0	0	0	0	0	0	0	0	0	0	0	0	0	0	0	0	0	0	0	0	0	0
108747	k__Bacteria	p__Firmicutes	c__Bacilli	o__Lactobacillales	f__Streptococcaceae	g__Streptococcus	s__Streptococcus_thermophilus	number.1 gg_id:00000 some annotation	2	55	52	145	21	12	8	12	2	15	5	570	10	584	501	75	222	1	0	1	4	152	6	1	66	4509	2	2	98	0	26	0	19	0	4	231	0	24	27	38	0
195781	k__Bacteria	p__Bacteroidetes	c__Bacteroidia	o__Bacteroidales	f__Bacteroidaceae	g__Bacteroides	s__unclassified	number.1 gg_id:00000 some annotation	0	0	0	0	0	0	0	0	12	0	0	0	0	0	0	0	0	0	0	0	0	0	0	0	0	0	0	0	0	0	0	0	0	4	0	0	0	0	0	0	0
524674	k__Bacteria	p__Firmicutes	c__Bacilli	o__Lactobacillales	f__unclassified	g__unclassified	s__unclassified	number.1 gg_id:00000 some annotation	0	0	0	5	0	0	0	0	0	0	0	0	1	0	1	0	0	0	0	0	0	0	0	0	0	0	0	0	0	0	0	0	0	0	0	0	0	1	2	1	1
140933	k__Bacteria	p__Proteobacteria	c__Gammaproteobacteria	o__Pseudomonadales	f__Pseudomonadaceae	g__Pseudomonas	s__unclassified	number.1 gg_id:00000 some annotation	0	0	0	0	0	0	0	0	0	0	0	1	0	0	0	0	0	0	0	0	0	0	0	0	0	0	0	0	0	0	0	0	0	0	0	0	0	0	0	0	0
528872	k__Bacteria	p__Proteobacteria	c__Gammaproteobacteria	o__Salinisphaerales	f__Salinisphaeraceae	g__Salinisphaera	s__unclassified	number.1 gg_id:00000 some annotation	0	0	1	0	0	0	0	0	0	0	0	0	0	0	0	0	0	0	0	0	0	0	0	0	0	0	0	0	0	0	0	0	0	0	0	0	0	0	0	0	0
535825	k__Bacteria	p__Firmicutes	c__Clostridia	o__Clostridiales	f__Veillonellaceae	g__unclassified	s__unclassified	number.1 gg_id:00000 some annotation	3	0	0	0	0	0	5	3	0	48	28	57	13	55	1	57	18	0	0	7	7	0	50	2	12	825	0	0	0	0	1	0	65	0	53	214	1	489	17	7	179
11365	k__Bacteria	p__Actinobacteria	c__Actinobacteria	o__Coriobacteriales	f__Coriobacteriaceae	g__unclassified	s__unclassified	number.1 gg_id:00000 some annotation	0	0	0	0	0	0	0	0	0	0	0	2	0	0	0	1	0	0	0	0	0	0	0	0	0	0	0	0	0	0	0	0	0	0	23	3	0	0	0	0	1
103369	k__Bacteria	p__Proteobacteria	c__Alphaproteobacteria	o__Sphingomonadales	f__Sphingomonadaceae	g__unclassified	s__unclassified	number.1 gg_id:00000 some annotation	0	0	0	0	0	0	0	0	0	0	0	0	0	0	0	0	1	0	0	0	0	0	0	0	0	0	0	0	0	0	0	0	0	0	0	0	0	0	0	0	0
189396	k__Bacteria	p__Firmicutes	c__Clostridia	o__Clostridiales	f__Lachnospiraceae	g__Ruminococcus	s__unclassified	number.1 gg_id:00000 some annotation	0	0	0	0	0	0	0	0	0	0	0	0	0	0	0	0	0	0	0	0	0	0	0	0	0	0	0	0	0	0	0	0	0	0	0	0	0	0	0	0	0
231137	k__Bacteria	p__Firmicutes	c__Clostridia	o__Clostridiales	f__Lachnospiraceae	g__unclassified	s__unclassified	number.1 gg_id:00000 some annotation	0	0	0	0	0	0	0	0	27	0	0	0	0	0	0	0	0	0	0	0	0	0	0	0	0	0	0	0	0	0	0	0	0	0	0	0	0	0	0	0	0
500281	k__Bacteria	p__Firmicutes	c__Clostridia	o__Clostridiales	f__Clostridiales_Family_XI._Incertae_Sedis	g__Parvimonas	s__Parvimonas_micra	number.1 gg_id:00000 some annotation	0	0	2	0	0	1	4	6	0	34	14	0	0	0	5	20	0	0	41	33	0	138	0	0	0	0	1	0	0	0	5	0	0	0	9	0	0	0	0	0	6
350760	k__Bacteria	p__Proteobacteria	c__Alphaproteobacteria	o__Rhizobiales	f__Xanthobacteraceae	g__unclassified	s__unclassified	number.1 gg_id:00000 some annotation	0	0	0	0	0	0	0	0	0	0	0	0	0	0	0	0	0	0	0	0	0	0	0	0	0	0	0	0	0	0	0	0	0	0	0	0	1	0	0	0	0
250579	k__Bacteria	p__Proteobacteria	c__Betaproteobacteria	o__Burkholderiales	f__Comamonadaceae	g__Rhodoferax	s__unclassified	number.1 gg_id:00000 some annotation	0	0	0	0	0	0	3	0	0	0	0	0	0	0	0	0	0	0	0	0	0	0	0	0	0	0	0	0	0	0	0	0	0	0	0	0	0	0	0	0	0
182724	k__Bacteria	p__Firmicutes	c__Clostridia	o__Clostridiales	f__Lachnospiraceae	g__Eubacterium	s__unclassified	number.1 gg_id:00000 some annotation	0	0	0	0	0	0	0	0	0	0	0	0	0	0	0	0	0	0	0	0	0	0	0	0	0	0	0	0	0	0	0	0	0	1	0	0	0	0	0	0	0
535929	k__Bacteria	p__Cyanobacteria	c__Chloroplast	o__Cryptophyta	f__unclassified	g__unclassified	s__unclassified	number.1 gg_id:00000 some annotation	0	0	0	0	0	0	0	0	0	0	0	0	0	0	0	0	0	0	0	0	0	0	0	0	0	0	0	0	0	0	0	0	0	0	0	0	0	0	0	0	0
383716	k__Bacteria	p__Firmicutes	c__Clostridia	o__Clostridiales	f__Clostridiaceae	g__unclassified	s__unclassified	number.1 gg_id:00000 some annotation	0	0	0	0	0	0	0	0	0	0	0	0	0	0	0	0	0	0	0	0	0	0	0	0	0	0	0	0	0	0	0	0	0	0	0	0	0	0	0	0	0
263834	k__Bacteria	p__Firmicutes	c__Clostridia	o__Clostridiales	f__Lachnospiraceae	g__unclassified	s__unclassified	number.1 gg_id:00000 some annotation	0	0	0	0	0	0	0	0	0	0	0	0	0	0	0	0	0	0	0	0	0	0	0	0	0	0	0	0	0	0	0	0	0	0	0	0	0	0	0	0	0
341462	k__Bacteria	p__Proteobacteria	c__Betaproteobacteria	o__Burkholderiales	f__unclassified	g__unclassified	s__unclassified	number.1 gg_id:00000 some annotation	0	0	0	0	0	0	0	0	0	0	10	0	0	0	0	0	0	0	0	0	0	6	0	0	0	0	0	0	1	0	0	0	0	0	0	0	0	0	0	0	0
131262	k__Bacteria	p__Actinobacteria	c__Actinobacteria	o__Actinomycetales	f__Nocardiaceae	g__Rhodococcus	s__unclassified	number.1 gg_id:00000 some annotation	0	0	0	0	0	0	0	0	0	0	0	0	0	0	0	0	0	0	0	0	0	0	0	0	0	0	0	0	0	0	0	0	0	0	0	0	0	0	0	0	0
11298	k__Bacteria	p__Fusobacteria	c__Fusobacteria	o__Fusobacteriales	f__Fusobacteriaceae	g__Sneathia	s__unclassified	number.1 gg_id:00000 some annotation	0	0	0	0	0	0	0	0	0	0	0	0	0	0	1	0	0	0	0	0	0	0	0	0	0	0	0	0	0	99	0	0	0	0	0	0	0	0	0	0	0
92743	k__Bacteria	p__Bacteroidetes	c__Bacteroidia	o__Bacteroidales	f__unclassified	g__unclassified	s__unclassified	number.1 gg_id:00000 some annotation	8	0	0	0	0	2	2	13	9	0	0	0	158	65	8	66	0	0	853	733	0	170	24	0	0	0	1651	0	0	0	17	0	0	0	219	0	1	0	0	0	457
422931	k__Bacteria	p__Firmicutes	c__Bacilli	o__Lactobacillales	f__Lactobacillaceae	g__Lactobacillus	s__unclassified	number.1 gg_id:00000 some annotation	0	0	0	0	0	0	0	0	0	0	0	0	0	0	0	0	0	0	0	0	0	0	0	0	0	0	0	0	0	0	0	0	0	0	0	0	0	0	0	0	0
11293	k__Bacteria	p__Fusobacteria	c__Fusobacteria	o__Fusobacteriales	f__Fusobacteriaceae	g__Streptobacillus	s__Streptobacillus_moniliformis	number.1 gg_id:00000 some annotation	0	0	0	0	0	0	0	0	0	0	0	0	0	0	0	0	0	0	0	6	0	0	0	0	0	0	0	0	0	0	0	0	0	0	1	0	0	0	0	0	0
11297	k__Bacteria	p__Fusobacteria	c__Fusobacteria	o__Fusobacteriales	f__Fusobacteriaceae	g__Leptotrichia	s__unclassified	number.1 gg_id:00000 some annotation	1	33	0	4	68	1	2	2	2	0	0	4	6	23	57	0	238	47	0	0	10	0	0	0	1	0	0	1	0	0	1	18	6	0	0	7	1	0	0	0	0
277801	k__Bacteria	p__Proteobacteria	c__Betaproteobacteria	o__Burkholderiales	f__unclassified	g__unclassified	s__unclassified	number.1 gg_id:00000 some annotation	0	0	0	0	1	0	0	0	0	0	0	0	0	0	0	0	0	0	0	0	0	0	0	0	0	0	0	0	1	0	0	0	0	0	0	0	0	0	0	0	0
3906	k__Bacteria	p__Spirochaetes	c__Spirochaetes	o__Spirochaetales	f__Spirochaetaceae	g__Treponema	s__Treponema_denticola	number.1 gg_id:00000 some annotation	0	0	0	0	0	0	0	0	0	0	0	0	0	1	0	0	0	0	0	9	27	0	0	0	0	0	0	0	0	0	0	0	0	0	0	0	0	0	0	0	0
328532	k__Bacteria	p__Firmicutes	c__Clostridia	o__Clostridiales	f__Ruminococcaceae	g__unclassified	s__unclassified	number.1 gg_id:00000 some annotation	0	0	0	0	0	0	0	0	13	0	0	0	0	0	0	0	0	0	0	0	0	0	0	0	0	0	0	0	0	0	0	0	0	0	0	0	0	0	0	0	0
286210	k__Bacteria	p__Proteobacteria	c__Gammaproteobacteria	o__Pasteurellales	f__Pasteurellaceae	g__unclassified	s__unclassified	number.1 gg_id:00000 some annotation	0	0	0	0	0	0	0	0	0	0	0	0	0	0	0	0	0	0	0	0	0	0	0	0	0	0	0	0	0	0	0	1	0	0	0	0	0	0	0	0	0
583958	k__Bacteria	p__Firmicutes	c__Clostridia	o__Clostridiales	f__Lachnospiraceae	g__unclassified	s__unclassified	number.1 gg_id:00000 some annotation	0	0	0	0	0	0	0	0	0	0	0	0	0	0	0	0	0	0	0	0	0	0	0	0	0	0	0	0	0	0	0	0	0	0	0	0	0	0	0	0	0
269541	k__Bacteria	p__Firmicutes	c__Bacilli	o__Bacillales	f__Staphylococcaceae	g__Staphylococcus	s__unclassified	number.1 gg_id:00000 some annotation	0	0	0	0	0	0	0	0	0	0	0	0	0	0	0	1	0	0	0	0	0	4	0	0	0	0	0	0	1	2	0	0	0	0	0	0	0	0	0	0	0
43037	k__Bacteria	p__Proteobacteria	c__Alphaproteobacteria	o__Rhodospirillales	f__Acetobacteraceae	g__unclassified	s__unclassified	number.1 gg_id:00000 some annotation	0	0	0	0	0	0	0	0	0	0	0	0	0	0	0	0	0	0	0	0	0	0	0	0	0	0	0	0	0	0	0	0	0	0	0	0	0	0	0	0	0
519827	k__Bacteria	p__Firmicutes	c__Bacilli	o__Bacillales	f__Staphylococcaceae	g__Staphylococcus	s__unclassified	number.1 gg_id:00000 some annotation	0	0	0	0	0	0	0	0	0	0	0	0	0	0	0	0	0	0	0	0	0	0	0	0	0	0	0	0	0	0	0	0	0	0	0	0	0	0	0	0	0
386273	k__Bacteria	p__Proteobacteria	c__Epsilonproteobacteria	o__Campylobacterales	f__Campylobacteraceae	g__Campylobacter	s__Bacteroides_ureolyticus	number.1 gg_id:00000 some annotation	0	0	0	0	0	0	0	0	0	0	0	0	0	0	0	0	0	0	0	0	0	0	0	0	0	0	0	0	0	0	0	0	0	0	0	0	0	0	0	0	0
235904	k__Bacteria	p__Bacteroidetes	c__Sphingobacteria	o__Sphingobacteriales	f__Chitinophagaceae	g__unclassified	s__unclassified	number.1 gg_id:00000 some annotation	0	0	0	0	2	0	0	0	0	0	0	0	0	0	0	0	0	0	0	0	0	0	0	0	0	0	0	0	0	0	0	0	0	0	0	0	0	0	0	0	0
79835	k__Bacteria	p__Firmicutes	c__Bacilli	o__Lactobacillales	f__Lactobacillaceae	g__Pediococcus	s__unclassified	number.1 gg_id:00000 some annotation	0	0	0	0	0	0	0	0	0	0	0	0	0	0	0	0	2	0	0	0	0	0	0	0	0	0	0	0	0	0	0	0	0	0	0	0	0	0	0	0	0
74211	k__Bacteria	p__Proteobacteria	c__Gammaproteobacteria	o__Pasteurellales	f__Pasteurellaceae	g__Actinobacillus	s__unclassified	number.1 gg_id:00000 some annotation	0	0	0	0	0	0	0	0	0	0	0	0	57	0	0	63	0	0	0	0	0	0	0	0	35	0	0	5	21	0	28	0	0	0	0	0	0	0	0	14	0
102425	k__Bacteria	p__Bacteroidetes	c__Bacteroidia	o__Bacteroidales	f__Prevotellaceae	g__Prevotella	s__Prevotella_nigrescens	number.1 gg_id:00000 some annotation	3	0	0	1	0	0	41	1	1	1	0	83	197	403	26	190	0	3	13866	15	937	167	57	1	1	0	2792	0	1	1	2	3	23	1	34	41	7	1	1	2	60
13456	k__Bacteria	p__Actinobacteria	c__Actinobacteria	o__Actinomycetales	f__Corynebacteriaceae	g__Corynebacterium	s__unclassified	number.1 gg_id:00000 some annotation	0	0	0	0	0	0	0	0	0	0	0	0	0	1	0	0	0	0	0	0	0	0	0	0	0	0	0	0	0	0	0	0	0	0	0	0	0	0	0	0	0
140458	k__Bacteria	p__Proteobacteria	c__Betaproteobacteria	o__Rhodocyclales	f__Rhodocyclaceae	g__unclassified	s__unclassified	number.1 gg_id:00000 some annotation	0	0	0	0	0	0	0	0	1	0	0	0	0	0	0	0	0	0	0	0	0	0	0	0	0	0	0	0	0	0	0	0	0	0	0	0	0	0	0	0	0
297295	k__Bacteria	p__Firmicutes	c__Clostridia	o__Clostridiales	f__Lachnospiraceae	g__unclassified	s__unclassified	number.1 gg_id:00000 some annotation	0	0	0	0	0	0	0	0	0	0	0	0	0	0	0	0	0	0	0	0	0	0	0	0	0	0	0	0	0	0	0	0	0	0	0	0	0	0	0	0	0
7996	k__Bacteria	p__Proteobacteria	c__Gammaproteobacteria	o__Legionellales	f__Legionellaceae	g__unclassified	s__unclassified	number.1 gg_id:00000 some annotation	0	0	0	0	0	0	0	0	12	0	0	0	0	0	0	0	0	0	0	0	0	0	0	0	0	0	0	0	0	0	0	0	0	0	0	0	0	0	0	0	0
97263	k__Bacteria	p__Firmicutes	c__Clostridia	o__Clostridiales	f__Ruminococcaceae	g__unclassified	s__unclassified	number.1 gg_id:00000 some annotation	0	0	0	0	0	0	0	0	12	0	0	0	0	0	0	0	0	0	0	0	0	0	0	0	0	0	0	0	0	0	0	0	0	0	0	0	0	0	0	0	0
561987	k__Bacteria	p__Verrucomicrobia	c__Verrucomicrobiae	o__Verrucomicrobiales	f__Verrucomicrobiaceae	g__Akkermansia	s__unclassified	number.1 gg_id:00000 some annotation	0	0	0	0	0	0	0	0	0	0	0	0	0	0	0	0	0	0	0	0	0	0	0	0	0	0	0	0	0	0	0	0	0	0	0	0	0	0	0	0	0
231565	k__Bacteria	p__Actinobacteria	c__Actinobacteria	o__Coriobacteriales	f__Coriobacteriaceae	g__unclassified	s__unclassified	number.1 gg_id:00000 some annotation	0	0	0	0	0	0	0	0	0	0	0	0	0	0	0	0	0	0	0	0	0	0	0	0	0	0	0	0	0	0	0	0	0	0	0	0	0	0	0	0	0
52759	k__Bacteria	p__Firmicutes	c__Clostridia	o__Clostridiales	f__Ruminococcaceae	g__unclassified	s__unclassified	number.1 gg_id:00000 some annotation	0	0	0	0	0	0	0	0	0	0	0	0	0	0	0	0	0	0	0	0	0	0	0	0	0	0	0	0	0	0	0	0	0	0	0	0	0	0	0	0	0
75079	k__Bacteria	p__Proteobacteria	c__Alphaproteobacteria	o__Rhodospirillales	f__Acetobacteraceae	g__Roseomonas	s__unclassified	number.1 gg_id:00000 some annotation	0	0	0	0	0	0	0	0	0	0	0	0	0	0	0	0	0	0	0	0	0	0	0	0	0	0	0	0	0	0	0	0	0	0	0	0	0	0	0	0	0
120969	k__Bacteria	p__Firmicutes	c__Clostridia	o__Clostridiales	f__Veillonellaceae	g__Selenomonas	s__unclassified	number.1 gg_id:00000 some annotation	0	0	0	0	0	0	1	0	0	0	0	0	13	7	1	7	0	0	41	45	2	82	357	20	0	0	0	0	0	0	0	0	5	0	4	0	29	16	0	0	36
360440	k__Bacteria	p__Proteobacteria	c__Gammaproteobacteria	o__Pseudomonadales	f__Moraxellaceae	g__Acinetobacter	s__Acinetobacter_rhizosphaerae	number.1 gg_id:00000 some annotation	0	0	0	0	1	0	0	0	0	0	0	0	0	0	0	0	0	0	0	0	0	0	0	0	0	0	0	0	0	0	0	0	0	0	0	0	0	0	0	0	0
278919	k__Bacteria	p__Actinobacteria	c__Actinobacteria	o__Actinomycetales	f__Actinomycetaceae	g__Actinomyces	s__unclassified	number.1 gg_id:00000 some annotation	0	4	0	0	0	0	0	5	6	0	0	0	2	0	0	0	0	0	0	0	1	0	207	0	0	4	0	0	0	0	0	0	0	0	0	0	141	0	0	0	0
336277	k__Bacteria	p__Firmicutes	c__Clostridia	o__Clostridiales	f__Lachnospiraceae	g__unclassified	s__unclassified	number.1 gg_id:00000 some annotation	0	0	0	0	0	0	0	0	0	0	0	0	0	0	0	0	0	0	0	0	0	0	0	0	0	0	0	0	0	0	0	0	0	0	0	0	0	0	0	0	0
142000	k__Bacteria	p__Bacteroidetes	c__Flavobacteria	o__Flavobacteriales	f__Flavobacteriaceae	g__unclassified	s__unclassified	number.1 gg_id:00000 some annotation	4	108	33	55	389	13	35	122	18	31	16	8	46	24	65	20	0	185	1	0	30	0	17	21	42	1	128	134	174	0	354	262	7	0	3	11	11	24	150	18	183
149051	k__Bacteria	p__Proteobacteria	c__Betaproteobacteria	o__Rhodocyclales	f__Rhodocyclaceae	g__Zoogloea	s__unclassified	number.1 gg_id:00000 some annotation	0	0	0	0	0	0	0	0	0	0	0	0	0	0	0	0	0	0	0	0	0	0	0	0	0	0	0	0	0	0	0	0	0	0	0	0	0	0	0	0	0
75279	k__Bacteria	p__Proteobacteria	c__Betaproteobacteria	o__Neisseriales	f__Neisseriaceae	g__Neisseria	s__unclassified	number.1 gg_id:00000 some annotation	0	0	0	0	0	0	0	0	0	0	0	0	0	0	0	0	0	0	0	0	5	0	0	0	0	0	0	0	0	0	0	0	0	0	0	0	0	0	0	0	0
45265	k__Bacteria	p__Firmicutes	c__Bacilli	o__Gemellales	f__Gemellaceae	g__Gemella	s__unclassified	number.1 gg_id:00000 some annotation	0	0	0	0	0	0	1	0	0	0	0	0	0	0	0	0	1	0	0	0	0	0	0	0	0	0	0	0	0	0	0	0	0	0	0	0	0	0	0	0	0
203708	k__Bacteria	p__Firmicutes	c__Clostridia	o__Clostridiales	f__Ruminococcaceae	g__Ruminococcus	s__unclassified	number.1 gg_id:00000 some annotation	0	0	0	0	0	0	0	0	1	0	0	0	0	0	0	0	0	0	0	0	0	0	0	0	0	0	0	0	0	0	0	0	0	0	0	0	0	0	0	0	0
113558	k__Bacteria	p__Proteobacteria	c__Gammaproteobacteria	o__Enterobacteriales	f__Enterobacteriaceae	g__unclassified	s__unclassified	number.1 gg_id:00000 some annotation	0	0	0	0	0	0	0	0	0	0	0	0	0	0	0	2	0	0	0	0	0	4	0	0	0	0	0	0	2	0	0	0	0	0	0	0	0	0	0	0	0
112685	k__Bacteria	p__Bacteroidetes	c__Sphingobacteria	o__Sphingobacteriales	f__Flexibacteraceae	g__Emticicia	s__unclassified	number.1 gg_id:00000 some annotation	0	0	0	0	0	0	0	0	0	0	0	0	0	0	0	0	0	0	0	0	0	0	0	0	0	0	0	0	0	0	0	0	0	0	0	0	0	0	0	0	0
329371	k__Bacteria	p__Bacteroidetes	c__Bacteroidia	o__Bacteroidales	f__RikenellaceaeII	g__unclassified	s__unclassified	number.1 gg_id:00000 some annotation	0	0	0	0	0	0	0	0	1	0	0	0	0	0	0	0	0	0	0	0	0	0	0	0	0	0	0	0	0	0	0	0	0	0	0	0	0	0	0	0	0
519755	k__Bacteria	p__Proteobacteria	c__Alphaproteobacteria	o__Rhizobiales	f__Phyllobacteriaceae	g__unclassified	s__unclassified	number.1 gg_id:00000 some annotation	0	0	0	0	0	0	0	0	0	0	0	0	0	0	0	0	0	0	0	0	0	0	0	0	0	0	0	0	0	0	0	0	0	0	0	0	0	0	0	0	0
390886	k__Bacteria	p__Actinobacteria	c__Actinobacteria	o__Actinomycetales	f__Microbacteriaceae	g__Agromyces	s__unclassified	number.1 gg_id:00000 some annotation	0	0	0	0	0	0	0	0	0	0	0	0	0	0	0	0	0	0	0	0	0	1	0	0	0	0	0	0	0	0	0	0	0	0	0	0	0	0	0	0	0
539107	k__Bacteria	p__Proteobacteria	c__Gammaproteobacteria	o__Enterobacteriales	f__Enterobacteriaceae	g__Pantoea	s__Pantoea_ananatis	number.1 gg_id:00000 some annotation	0	0	0	0	0	0	0	0	0	0	0	0	0	0	0	0	0	0	0	0	0	0	0	0	0	0	0	0	0	0	10	0	0	0	0	0	0	0	0	0	0
512277	k__Bacteria	p__Proteobacteria	c__Alphaproteobacteria	o__Rhodobacterales	f__Rhodobacteraceae	g__Rhodobacter	s__unclassified	number.1 gg_id:00000 some annotation	0	0	0	0	0	0	0	0	0	0	0	0	0	0	0	0	0	0	0	0	0	0	0	0	0	0	0	0	0	0	0	0	0	0	0	0	0	0	0	0	0
459421	k__Bacteria	p__Firmicutes	c__Clostridia	o__Clostridiales	f__Veillonellaceae	g__Anaeroglobus	s__unclassified	number.1 gg_id:00000 some annotation	0	0	0	0	0	0	6	0	0	4	64	4	5	0	1	0	1	0	0	2	2	0	0	0	0	0	0	0	0	0	0	0	1	0	8	0	0	0	1	0	23
568276	k__Bacteria	p__Proteobacteria	c__Gammaproteobacteria	o__Pasteurellales	f__Pasteurellaceae	g__Actinobacillus	s__unclassified	number.1 gg_id:00000 some annotation	0	0	0	0	0	0	0	0	0	0	0	0	0	0	0	0	0	0	0	0	0	0	0	0	0	0	0	0	0	0	1	0	0	0	0	0	0	0	0	0	0
175537	k__Bacteria	p__Firmicutes	c__Clostridia	o__Clostridiales	f__Lachnospiraceae	g__unclassified	s__unclassified	number.1 gg_id:00000 some annotation	0	0	0	0	0	0	0	0	0	0	0	0	0	0	0	0	0	0	0	0	0	0	0	0	0	0	0	0	1	0	0	0	0	0	0	0	0	0	0	0	0
416617	k__Bacteria	p__Planctomycetes	c__Planctomycea	o__Gemmatales	f__Gemmataceae	g__Gemmata	s__unclassified	number.1 gg_id:00000 some annotation	0	0	0	0	0	0	1	0	0	0	0	0	0	0	0	0	0	0	0	0	0	0	0	0	0	0	0	0	0	0	0	0	0	0	0	0	0	0	0	0	0
113333	k__Bacteria	p__Bacteroidetes	c__Bacteroidia	o__Bacteroidales	f__Porphyromonadaceae	g__Parabacteroides	s__unclassified	number.1 gg_id:00000 some annotation	0	0	0	0	0	0	0	1	33	0	2	0	0	0	0	0	0	0	0	0	0	0	0	0	0	0	0	1	0	0	0	0	0	0	0	0	0	0	0	0	0
254127	k__Bacteria	p__Proteobacteria	c__Alphaproteobacteria	o__Rickettsiales	f__Rickettsiaceae	g__unclassified	s__unclassified	number.1 gg_id:00000 some annotation	0	0	0	0	0	0	0	0	0	0	0	0	0	0	0	0	0	0	0	0	0	0	0	0	0	0	0	0	0	0	0	0	0	0	0	0	0	0	0	0	0
13453	k__Bacteria	p__Actinobacteria	c__Actinobacteria	o__Actinomycetales	f__Corynebacteriaceae	g__Corynebacterium	s__unclassified	number.1 gg_id:00000 some annotation	0	0	0	0	0	0	0	0	0	0	0	0	0	0	0	0	0	0	0	0	0	40	0	0	0	0	0	0	0	0	0	0	0	0	0	0	0	0	0	0	0
484338	k__Bacteria	p__Bacteroidetes	c__Bacteroidia	o__Bacteroidales	f__Prevotellaceae	g__Prevotella	s__Prevotella_tannerae	number.1 gg_id:00000 some annotation	0	0	0	0	1	0	20	0	0	0	0	74	412	16	47	23	0	0	177	1998	1741	46	48	1	0	0	2459	1	14	2	2	1	0	2	151	55	6	0	2	1	1042
44359	k__Bacteria	p__Firmicutes	c__Bacilli	o__Lactobacillales	f__Streptococcaceae	g__Streptococcus	s__unclassified	number.1 gg_id:00000 some annotation	0	0	0	0	0	0	0	0	0	0	0	0	0	0	0	0	0	0	0	0	0	0	0	0	0	0	0	0	0	0	0	0	0	0	0	0	0	0	0	0	0
71171	k__Bacteria	p__Thermi	c__Deinococci	o__Thermales	f__Thermaceae	g__Thermus	s__unclassified	number.1 gg_id:00000 some annotation	0	0	1	0	2	0	0	0	9	0	0	0	0	0	0	0	0	0	0	0	0	0	0	0	0	0	0	0	0	0	0	0	0	0	0	0	0	0	0	0	0
364479	k__Bacteria	p__Firmicutes	c__Bacilli	o__Lactobacillales	f__Streptococcaceae	g__Streptococcus	s__unclassified	number.1 gg_id:00000 some annotation	0	0	0	0	0	0	0	0	0	0	0	0	0	0	9	0	0	0	0	0	0	0	0	0	0	0	0	0	0	0	0	0	0	0	0	0	0	0	0	0	0
351023	k__Bacteria	p__Proteobacteria	c__Gammaproteobacteria	o__Enterobacteriales	f__Enterobacteriaceae	g__Erwinia	s__unclassified	number.1 gg_id:00000 some annotation	0	0	0	0	0	0	0	0	0	0	0	0	0	0	0	0	0	0	0	0	0	1	0	0	0	0	0	0	0	0	0	0	0	1	0	0	0	0	0	0	0
137192	k__Bacteria	p__Proteobacteria	c__Gammaproteobacteria	o__Chromatiales	f__Sinobacteraceae	g__unclassified	s__unclassified	number.1 gg_id:00000 some annotation	0	0	0	0	0	0	0	0	0	0	0	0	0	0	0	0	0	0	0	0	0	401	0	0	0	0	0	0	0	0	0	0	0	0	0	0	0	0	0	0	0
137197	k__Bacteria	p__Bacteroidetes	c__Flavobacteria	o__Flavobacteriales	f__Flavobacteriaceae	g__unclassified	s__unclassified	number.1 gg_id:00000 some annotation	0	0	8	0	3	1	1	0	0	0	0	0	3	6	1	8	0	3	0	0	0	0	14	0	0	0	5	2	0	0	0	2	1	0	1	0	58	0	0	0	40
68339	k__Bacteria	p__Bacteroidetes	c__Bacteroidia	o__Bacteroidales	f__Prevotellaceae	g__Prevotella	s__unclassified	number.1 gg_id:00000 some annotation	0	0	0	0	0	0	0	0	0	0	0	0	0	2	0	0	0	0	3	1	7	0	0	0	0	0	0	0	0	0	0	0	0	0	0	1	0	0	0	0	0
68338	k__Bacteria	p__Bacteroidetes	c__Bacteroidia	o__Bacteroidales	f__Prevotellaceae	g__Prevotella	s__unclassified	number.1 gg_id:00000 some annotation	0	0	0	0	0	0	0	0	0	0	0	0	0	5	0	0	0	0	0	1	37	0	4	0	0	0	0	0	0	0	0	0	0	0	9	0	4	0	0	0	0
333576	k__Bacteria	p__Firmicutes	c__Clostridia	o__Clostridiales	f__Lachnospiraceae	g__unclassified	s__unclassified	number.1 gg_id:00000 some annotation	0	0	0	0	0	0	0	0	22	0	0	0	0	0	0	0	0	0	0	0	0	0	0	0	0	0	0	0	0	0	0	0	0	0	0	0	0	0	0	0	0
588912	k__Bacteria	p__Bacteroidetes	c__Bacteroidia	o__Bacteroidales	f__Prevotellaceae	g__Prevotella	s__unclassified	number.1 gg_id:00000 some annotation	0	0	0	0	0	0	2	0	3	0	0	6	10	17	1	56	1	0	0	0	471	214	2050	0	0	2	0	1	3	0	20	0	5	0	6	5	937	0	0	0	0
365047	k__Bacteria	p__Firmicutes	c__Clostridia	o__Clostridiales	f__Lachnospiraceae	g__Blautia	s__unclassified	number.1 gg_id:00000 some annotation	0	0	0	0	0	0	0	0	0	0	0	0	0	0	0	0	0	0	0	0	0	0	0	0	0	0	1	0	0	0	0	0	0	17	0	0	0	0	0	0	0
169002	k__Bacteria	p__Proteobacteria	c__Betaproteobacteria	o__Rhodocyclales	f__unclassified	g__unclassified	s__unclassified	number.1 gg_id:00000 some annotation	0	0	0	0	0	0	0	0	0	0	0	0	0	0	0	0	0	0	0	0	0	0	0	0	0	0	0	0	0	0	0	0	0	0	0	0	0	0	0	0	0
6997	k__Bacteria	p__Proteobacteria	c__Betaproteobacteria	o__Burkholderiales	f__Comamonadaceae	g__unclassified	s__unclassified	number.1 gg_id:00000 some annotation	0	0	0	0	0	0	0	0	0	0	0	0	0	0	0	1	0	0	0	0	0	0	0	0	0	0	0	0	0	0	0	0	0	0	0	0	0	0	0	0	0
272809	k__Bacteria	p__Firmicutes	c__Clostridia	o__Clostridiales	f__Lachnospiraceae	g__Clostridium	s__unclassified	number.1 gg_id:00000 some annotation	0	0	0	0	0	0	0	0	0	0	0	0	0	0	0	0	0	0	0	0	0	0	0	0	0	0	0	0	2	0	0	0	0	0	0	0	0	0	0	0	0
365288	k__Bacteria	p__Proteobacteria	c__Alphaproteobacteria	o__Rhizobiales	f__Hyphomicrobiaceae	g__Devosia	s__unclassified	number.1 gg_id:00000 some annotation	0	0	0	0	0	0	0	0	4	0	0	0	0	0	0	0	0	0	0	0	0	0	0	0	0	0	0	0	0	0	0	0	0	0	0	0	0	0	0	0	0
335206	k__Bacteria	p__Firmicutes	c__Clostridia	o__Clostridiales	f__unclassified	g__unclassified	s__unclassified	number.1 gg_id:00000 some annotation	0	0	0	0	0	0	0	0	0	0	0	0	0	0	0	0	0	0	0	0	0	0	0	0	0	0	0	0	0	0	0	0	0	0	0	0	0	0	0	0	0
39572	k__Bacteria	p__Firmicutes	c__Clostridia	o__Clostridiales	f__Veillonellaceae	g__Selenomonas	s__unclassified	number.1 gg_id:00000 some annotation	0	0	0	0	2	0	0	0	0	0	0	0	0	46	5	1	0	0	0	10	7	0	76	2	0	0	0	0	0	0	0	0	6	0	3	6	1	1	11	0	19
469800	k__Bacteria	p__Bacteroidetes	c__Bacteroidia	o__Bacteroidales	f__Bacteroidaceae	g__Bacteroides	s__Bacteroides_eggerthii	number.1 gg_id:00000 some annotation	0	0	0	0	0	0	0	0	0	0	0	0	0	0	0	0	0	0	0	0	0	0	0	0	0	0	0	0	0	0	0	0	0	0	0	0	0	0	0	0	0
238857	k__Bacteria	p__Bacteroidetes	c__Bacteroidia	o__Bacteroidales	f__RikenellaceaeII	g__unclassified	s__unclassified	number.1 gg_id:00000 some annotation	0	0	0	1	0	0	0	3	694	0	4	0	0	0	0	0	0	0	0	0	1	217	2	0	0	0	0	1	1	664	0	0	0	800	2	0	0	0	0	0	0
296977	k__Bacteria	p__Firmicutes	c__Clostridia	o__Clostridiales	f__Lachnospiraceae	g__Blautia	s__unclassified	number.1 gg_id:00000 some annotation	0	0	0	0	0	0	0	0	0	0	0	0	0	0	0	0	0	0	0	0	0	0	0	0	0	0	0	0	0	0	0	0	0	62	0	0	0	0	0	0	0
171435	k__Bacteria	p__Nitrospirae	c__Nitrospira	o__Nitrospirales	f__Nitrospiraceae	g__Nitrospira	s__unclassified	number.1 gg_id:00000 some annotation	0	0	0	0	0	0	0	0	0	0	0	0	0	0	0	0	0	0	0	0	0	0	0	0	0	0	0	0	0	0	0	0	0	0	0	0	0	0	0	0	0
212744	k__Bacteria	p__Firmicutes	c__Clostridia	o__Clostridiales	f__Lachnospiraceae	g__unclassified	s__unclassified	number.1 gg_id:00000 some annotation	0	0	0	0	0	0	0	0	74	0	0	0	0	0	0	0	0	0	0	0	0	0	0	0	0	0	0	0	0	1	0	0	0	39	0	0	0	0	0	0	0
471000	k__Bacteria	p__Firmicutes	c__Clostridia	o__Clostridiales	f__Lachnospiraceae	g__Shuttleworthia	s__Shuttleworthia_satelles	number.1 gg_id:00000 some annotation	0	0	0	1	0	0	0	0	0	0	0	0	3	0	0	4	0	0	0	5	1	0	0	0	0	0	0	0	0	0	0	0	0	0	226	2	0	0	4	0	9
267216	k__Bacteria	p__Firmicutes	c__Clostridia	o__Clostridiales	f__Lachnospiraceae	g__unclassified	s__unclassified	number.1 gg_id:00000 some annotation	0	0	0	0	0	0	0	0	13	0	0	0	0	0	0	0	0	0	0	0	0	0	0	0	0	0	0	0	0	0	0	0	0	0	0	0	0	0	0	0	0
562084	k__Bacteria	p__Proteobacteria	c__Gammaproteobacteria	o__Pseudomonadales	f__Moraxellaceae	g__Acinetobacter	s__unclassified	number.1 gg_id:00000 some annotation	0	0	0	0	0	0	0	1	0	0	0	0	0	0	0	0	0	0	0	0	0	0	0	0	0	0	0	0	1	0	0	0	0	0	0	0	0	0	0	0	0
110814	k__Bacteria	p__Proteobacteria	c__Betaproteobacteria	o__Burkholderiales	f__unclassified	g__unclassified	s__unclassified	number.1 gg_id:00000 some annotation	0	0	0	0	0	0	0	0	0	0	0	0	0	0	0	0	0	0	0	0	0	0	0	0	0	0	0	0	0	0	0	0	0	0	0	0	0	0	0	0	0
469663	k__Bacteria	p__Actinobacteria	c__Actinobacteria	o__Coriobacteriales	f__Coriobacteriaceae	g__Atopobium	s__Atopobium_vaginae	number.1 gg_id:00000 some annotation	0	0	0	0	0	0	0	0	0	0	0	0	0	0	0	0	0	0	0	1	0	0	0	0	0	0	0	0	0	0	0	0	0	0	11	0	0	0	0	0	0
247733	k__Bacteria	p__Firmicutes	c__Clostridia	o__Clostridiales	f__Veillonellaceae	g__Selenomonas	s__unclassified	number.1 gg_id:00000 some annotation	0	0	0	0	0	0	0	0	0	0	0	0	10	1	0	8	0	0	41	9	0	1	53	2	0	0	0	0	0	0	0	0	2	0	0	0	2	1	0	1	0
139937	k__Bacteria	p__Actinobacteria	c__Actinobacteria	o__Actinomycetales	f__Geodermatophilaceae	g__Geodermatophilus	s__unclassified	number.1 gg_id:00000 some annotation	0	0	0	0	0	0	0	0	0	0	0	0	0	0	0	0	0	0	0	0	0	0	0	0	0	0	0	0	0	40	0	0	0	0	0	0	0	0	0	0	0
262803	k__Bacteria	p__Actinobacteria	c__Actinobacteria	o__Coriobacteriales	f__Coriobacteriaceae	g__Olsenella	s__unclassified	number.1 gg_id:00000 some annotation	0	0	0	0	0	0	0	0	0	0	0	0	0	29	0	0	0	0	0	0	0	0	51	0	0	0	0	0	0	0	0	0	0	0	5	0	0	0	0	0	0
325509	k__Bacteria	p__Proteobacteria	c__Betaproteobacteria	o__Burkholderiales	f__unclassified	g__unclassified	s__unclassified	number.1 gg_id:00000 some annotation	0	0	0	0	0	0	0	0	0	0	0	0	0	0	0	0	0	0	0	0	0	0	0	0	0	0	0	0	0	0	0	0	0	0	0	0	0	0	0	0	0
144181	k__Bacteria	p__Proteobacteria	c__Betaproteobacteria	o__Rhodocyclales	f__Rhodocyclaceae	g__Dechloromonas	s__unclassified	number.1 gg_id:00000 some annotation	0	0	0	0	0	0	2	0	0	0	0	0	0	0	0	0	0	0	0	0	0	0	0	0	0	0	0	0	0	0	0	0	0	0	0	0	0	0	0	0	0
213762	k__Bacteria	p__Firmicutes	c__Clostridia	o__unclassified	f__unclassified	g__unclassified	s__unclassified	number.1 gg_id:00000 some annotation	0	0	0	0	0	0	0	0	0	0	0	0	0	0	0	0	0	0	0	0	0	0	0	0	0	0	0	0	0	92	0	0	0	0	0	0	0	0	0	0	0
195795	k__Bacteria	p__Bacteroidetes	c__Bacteroidia	o__Bacteroidales	f__Bacteroidaceae	g__Bacteroides	s__unclassified	number.1 gg_id:00000 some annotation	0	0	0	0	0	0	0	0	0	0	0	0	0	0	0	0	0	0	0	0	0	0	0	0	0	0	0	0	0	10	0	0	0	0	0	0	0	0	0	0	0
275935	k__Bacteria	p__Proteobacteria	c__Gammaproteobacteria	o__Pseudomonadales	f__Pseudomonadaceae	g__Pseudomonas	s__Pseudomonas_mendocina	number.1 gg_id:00000 some annotation	0	0	0	0	0	0	0	0	0	0	0	0	0	0	0	0	0	0	0	0	0	0	0	0	0	0	0	0	0	0	0	0	0	0	0	0	0	0	0	0	0
244304	k__Bacteria	p__Bacteroidetes	c__Bacteroidia	o__Bacteroidales	f__Bacteroidaceae	g__Bacteroides	s__unclassified	number.1 gg_id:00000 some annotation	0	0	0	0	0	0	0	0	0	0	0	0	0	0	0	0	0	0	0	0	0	0	0	0	0	0	0	0	0	0	0	0	0	0	0	0	0	1	0	0	0
33071	k__Bacteria	p__Firmicutes	c__Clostridia	o__Clostridiales	f__Veillonellaceae	g__Selenomonas	s__unclassified	number.1 gg_id:00000 some annotation	0	0	0	0	0	0	0	0	0	0	0	0	0	0	9	10	0	0	0	0	24	0	183	0	0	2	2	0	0	0	0	0	0	0	28	2	58	0	8	0	16
184464	k__Bacteria	p__Bacteroidetes	c__Bacteroidia	o__Bacteroidales	f__Prevotellaceae	g__Prevotella	s__Prevotella_copri	number.1 gg_id:00000 some annotation	0	0	0	0	0	0	0	0	0	0	0	0	0	0	0	0	0	0	0	0	0	0	0	0	0	0	0	0	0	0	0	0	0	4	0	0	0	0	0	0	0
573384	k__Bacteria	p__Firmicutes	c__Clostridia	o__Clostridiales	f__Veillonellaceae	g__Veillonella	s__unclassified	number.1 gg_id:00000 some annotation	0	0	0	0	0	0	0	0	0	0	0	0	0	135	0	0	0	0	0	0	2	0	0	0	0	0	0	0	0	0	0	0	0	0	0	80	0	0	0	0	0
319219	k__Bacteria	p__Firmicutes	c__Clostridia	o__Clostridiales	f__Lachnospiraceae	g__unclassified	s__unclassified	number.1 gg_id:00000 some annotation	0	0	0	0	0	0	0	2	0	0	0	0	0	0	0	0	0	0	0	0	0	0	0	0	0	0	0	0	0	0	0	0	0	0	0	0	0	0	0	0	0
136633	k__Bacteria	p__Firmicutes	c__Clostridia	o__Clostridiales	f__Lachnospiraceae	g__Clostridium	s__unclassified	number.1 gg_id:00000 some annotation	0	0	0	0	0	0	0	0	13	0	0	0	0	0	0	0	0	0	0	0	0	0	0	0	0	0	0	0	0	0	0	0	0	49	0	0	0	0	0	0	0
217996	k__Bacteria	p__Firmicutes	c__Bacilli	o__Bacillales	f__Staphylococcaceae	g__Staphylococcus	s__unclassified	number.1 gg_id:00000 some annotation	0	0	4	0	1	0	0	1	16	0	0	0	0	27	13	1	0	0	1	0	0	213	0	0	2	4	0	0	6	183	3	0	0	0	3	3	0	3	2	0	5
92629	k__Bacteria	p__Bacteroidetes	c__Bacteroidia	o__Bacteroidales	f__Prevotellaceae	g__Prevotella	s__unclassified	number.1 gg_id:00000 some annotation	0	0	0	0	0	0	0	0	0	0	0	1	3	0	0	0	0	0	0	82	13	0	1	0	0	0	5	0	0	0	0	0	0	0	3	1	1	0	0	0	27
445860	k__Bacteria	p__Bacteroidetes	c__Sphingobacteria	o__Sphingobacteriales	f__Chitinophagaceae	g__unclassified	s__unclassified	number.1 gg_id:00000 some annotation	0	0	0	0	0	0	0	0	0	0	0	0	0	0	0	0	0	0	0	0	0	0	0	0	0	0	0	0	0	0	0	0	0	0	0	0	0	0	0	0	0
177477	k__Bacteria	p__Tenericutes	c__Mollicutes	o__RF39	f__unclassified	g__unclassified	s__unclassified	number.1 gg_id:00000 some annotation	0	0	0	0	0	0	0	0	0	0	0	0	0	0	0	0	1	0	0	1	0	69	0	0	0	0	1	0	0	819	0	0	0	0	0	0	0	0	0	0	0
352304	k__Bacteria	p__Firmicutes	c__Clostridia	o__Clostridiales	f__Lachnospiraceae	g__Roseburia	s__unclassified	number.1 gg_id:00000 some annotation	0	0	0	0	0	0	0	0	0	0	0	0	0	0	0	0	0	0	0	0	1	0	0	0	0	0	0	0	0	0	0	0	0	0	0	0	0	0	0	0	0
107854	k__Bacteria	p__Firmicutes	c__Bacilli	o__Lactobacillales	f__Lactobacillaceae	g__Lactobacillus	s__unclassified	number.1 gg_id:00000 some annotation	0	0	0	0	0	0	0	0	0	0	0	0	0	0	0	0	0	0	0	0	0	0	0	0	0	1	0	0	0	0	0	0	0	0	0	0	0	0	0	0	0
359171	k__Bacteria	p__Firmicutes	c__Clostridia	o__Clostridiales	f__Clostridiales_Family_XI._Incertae_Sedis	g__Anaerococcus	s__Anaerococcus_hydrogenalis	number.1 gg_id:00000 some annotation	0	0	0	0	0	0	2	0	0	0	0	0	0	0	0	0	0	0	0	0	0	0	0	7	0	0	0	0	0	0	0	0	0	0	0	0	0	1	0	0	0
204917	k__Bacteria	p__Proteobacteria	c__Betaproteobacteria	o__Burkholderiales	f__Alcaligenaceae	g__unclassified	s__unclassified	number.1 gg_id:00000 some annotation	0	0	0	0	0	0	0	0	0	0	0	0	0	0	0	0	0	0	0	0	0	0	0	0	0	0	0	0	0	0	0	0	0	0	0	0	0	0	0	0	0
43339	k__Bacteria	p__unclassified	c__unclassified	o__unclassified	f__unclassified	g__unclassified	s__unclassified	number.1 gg_id:00000 some annotation	0	0	0	0	0	0	0	1	0	0	0	1	0	1	1	0	0	0	3	29	12	0	0	0	0	0	0	0	0	0	0	0	0	0	3	1	0	0	0	0	0
468138	k__Bacteria	p__Bacteroidetes	c__Flavobacteria	o__Flavobacteriales	f__Cryomorphaceae	g__Fluviicola	s__unclassified	number.1 gg_id:00000 some annotation	0	0	0	0	0	0	0	0	0	0	0	0	0	0	0	0	0	0	0	0	0	0	0	0	0	0	0	0	0	0	0	0	0	0	0	0	0	0	0	0	0
276677	k__Bacteria	p__Tenericutes	c__Erysipelotrichi	o__Erysipelotrichales	f__Erysipelotrichaceae	g__unclassified	s__unclassified	number.1 gg_id:00000 some annotation	0	0	0	0	0	0	0	0	12	0	0	0	0	0	0	0	0	0	0	0	0	0	0	0	0	0	0	0	0	0	0	0	0	0	0	0	0	0	0	0	0
82728	k__Bacteria	p__Proteobacteria	c__Gammaproteobacteria	o__Pasteurellales	f__Pasteurellaceae	g__unclassified	s__unclassified	number.1 gg_id:00000 some annotation	0	0	0	0	2	0	0	0	0	0	0	0	0	0	0	0	0	0	0	0	0	0	0	0	0	0	0	0	0	0	0	0	0	0	0	0	0	0	0	0	0
12338	k__Bacteria	p__Actinobacteria	c__Actinobacteria	o__Actinomycetales	f__Cellulomonadaceae	g__Cellulomonas	s__unclassified	number.1 gg_id:00000 some annotation	0	0	0	0	0	0	0	0	0	0	0	0	0	0	0	0	0	0	0	0	0	0	0	0	0	0	0	0	0	0	0	0	0	0	0	0	0	0	0	0	0
303815	k__Bacteria	p__Proteobacteria	c__Betaproteobacteria	o__unclassified	f__unclassified	g__unclassified	s__unclassified	number.1 gg_id:00000 some annotation	0	1	1	0	0	0	0	0	0	0	0	0	0	0	0	0	0	0	0	0	0	0	0	0	1	1	0	0	0	0	0	0	0	0	0	1	1	0	0	0	0
352838	k__Bacteria	p__Proteobacteria	c__Betaproteobacteria	o__Burkholderiales	f__Burkholderiaceae	g__Polynucleobacter	s__unclassified	number.1 gg_id:00000 some annotation	0	0	0	0	1	0	0	0	4	1	0	0	0	0	0	0	0	0	0	0	0	0	0	0	0	0	0	0	0	0	0	0	0	0	0	0	0	0	0	0	0
2181	k__Bacteria	p__Bacteroidetes	c__Bacteroidia	o__Bacteroidales	f__Prevotellaceae	g__Prevotella	s__unclassified	number.1 gg_id:00000 some annotation	0	0	0	0	0	0	0	0	0	0	0	0	0	0	0	0	0	0	0	27	0	0	0	0	0	0	0	0	0	0	0	0	0	0	0	0	0	0	0	0	0
60257	k__Bacteria	p__Bacteroidetes	c__Bacteroidia	o__Bacteroidales	f__Prevotellaceae	g__Prevotella	s__unclassified	number.1 gg_id:00000 some annotation	0	0	0	0	0	0	0	0	0	0	0	4	0	0	0	0	0	0	0	0	47	0	1	0	0	0	0	0	0	0	0	0	0	0	0	3	2	0	0	0	0
60254	k__Bacteria	p__Cyanobacteria	c__Chloroplast	o__Streptophyta	f__unclassified	g__unclassified	s__unclassified	number.1 gg_id:00000 some annotation	0	0	1	0	1	1	0	0	9	0	3	0	1	0	0	1	6	0	0	0	0	171	0	0	8	5	0	0	1	0	1	0	0	12059	0	0	0	0	0	2	0
60251	k__Bacteria	p__Proteobacteria	c__Alphaproteobacteria	o__Sphingomonadales	f__Sphingomonadaceae	g__Sphingomonas	s__unclassified	number.1 gg_id:00000 some annotation	0	0	0	0	0	0	0	1	0	0	0	0	0	0	0	0	0	0	0	0	0	0	0	0	0	0	0	0	0	0	0	0	0	0	0	0	0	8	0	0	0
184966	k__Bacteria	p__Firmicutes	c__Clostridia	o__Clostridiales	f__Lachnospiraceae	g__unclassified	s__unclassified	number.1 gg_id:00000 some annotation	0	0	0	0	0	0	0	0	15	0	0	0	0	0	0	0	0	0	0	0	0	0	0	0	0	0	0	0	0	0	0	0	0	0	0	0	0	0	0	0	0
240979	k__Bacteria	p__Proteobacteria	c__Alphaproteobacteria	o__Rhodobacterales	f__Rhodobacteraceae	g__unclassified	s__unclassified	number.1 gg_id:00000 some annotation	0	0	0	0	0	0	0	0	0	0	0	0	0	0	0	0	0	0	0	0	0	0	0	0	0	0	0	0	0	0	0	0	0	0	0	0	0	0	0	0	0
6699	k__Bacteria	p__Proteobacteria	c__Betaproteobacteria	o__Rhodocyclales	f__Rhodocyclaceae	g__unclassified	s__unclassified	number.1 gg_id:00000 some annotation	0	0	0	0	1	0	0	0	0	0	0	0	0	0	0	0	0	0	0	0	0	0	0	0	0	0	0	0	0	0	0	0	0	0	0	0	0	0	0	0	0
292471	k__Bacteria	p__TM7	c__TM7-3	o__EW055	f__unclassified	g__unclassified	s__unclassified	number.1 gg_id:00000 some annotation	0	0	0	0	0	0	0	0	0	0	0	0	0	0	0	0	0	0	0	0	0	0	0	0	0	0	0	0	0	0	0	0	0	0	0	0	1	0	0	0	0
277653	k__Bacteria	p__Proteobacteria	c__Alphaproteobacteria	o__Rhodobacterales	f__Rhodobacteraceae	g__Rhodobacter	s__unclassified	number.1 gg_id:00000 some annotation	0	0	0	0	0	0	0	0	0	0	0	0	0	0	0	0	0	0	0	0	0	0	0	0	0	0	0	0	0	0	0	0	0	0	0	0	0	0	0	0	0
56203	k__Bacteria	p__Proteobacteria	c__Epsilonproteobacteria	o__Campylobacterales	f__Campylobacteraceae	g__Campylobacter	s__unclassified	number.1 gg_id:00000 some annotation	0	0	0	0	0	0	0	0	0	0	1	0	0	0	1	3	1	1	0	0	0	0	0	0	0	0	0	0	0	0	1	0	0	0	0	0	1	0	1	1	3
556878	k__Bacteria	p__Verrucomicrobia	c__Verrucomicrobiae	o__Verrucomicrobiales	f__Verrucomicrobiaceae	g__Prosthecobacter	s__unclassified	number.1 gg_id:00000 some annotation	0	0	0	0	0	0	0	0	0	0	0	0	0	0	0	0	0	0	0	0	0	0	0	0	0	0	0	0	0	0	0	0	0	0	0	0	0	0	0	0	0
56208	k__Bacteria	p__Bacteroidetes	c__Flavobacteria	o__Flavobacteriales	f__Flavobacteriaceae	g__Capnocytophaga	s__unclassified	number.1 gg_id:00000 some annotation	0	0	0	0	0	0	0	0	0	0	0	0	3	10	2	0	0	1	0	0	0	80	51	0	0	0	0	0	0	0	0	5	0	0	1	0	386	0	0	0	0
510646	k__Bacteria	p__Acidobacteria	c__Chloracidobacteria	o__unclassified	f__unclassified	g__unclassified	s__unclassified	number.1 gg_id:00000 some annotation	0	0	0	0	0	0	0	0	0	1	0	0	0	0	0	0	0	0	0	0	0	0	0	0	0	0	0	0	0	0	0	0	0	0	0	0	0	0	0	0	0
64550	k__Bacteria	p__Proteobacteria	c__Betaproteobacteria	o__Burkholderiales	f__unclassified	g__unclassified	s__unclassified	number.1 gg_id:00000 some annotation	0	0	0	0	0	0	0	0	0	1	0	0	0	0	0	0	0	0	0	0	0	38	0	0	0	1	0	0	0	0	0	0	0	0	0	0	0	0	0	0	0
277727	k__Bacteria	p__Bacteroidetes	c__Sphingobacteria	o__Sphingobacteriales	f__Flexibacteraceae	g__unclassified	s__unclassified	number.1 gg_id:00000 some annotation	0	0	0	0	0	0	0	0	0	0	0	0	0	0	0	0	0	0	0	0	0	0	0	0	0	0	0	0	0	0	0	0	0	0	0	0	0	0	0	0	1
329744	k__Bacteria	p__Actinobacteria	c__Actinobacteria	o__Actinomycetales	f__ACK-M1	g__unclassified	s__unclassified	number.1 gg_id:00000 some annotation	0	0	0	0	0	0	0	0	0	0	0	0	0	0	0	0	0	0	0	0	0	0	0	0	0	0	0	0	0	0	0	0	0	0	0	0	0	0	0	0	0
579129	k__Bacteria	p__Planctomycetes	c__Planctomycea	o__Planctomycetales	f__Planctomycetaceae	g__unclassified	s__unclassified	number.1 gg_id:00000 some annotation	0	0	0	0	0	0	0	0	0	0	0	0	0	0	0	0	0	0	0	0	0	0	0	0	0	0	0	0	0	0	0	0	0	0	0	0	0	0	0	0	0
414138	k__Bacteria	p__Actinobacteria	c__Actinobacteria	o__Actinomycetales	f__Actinomycetaceae	g__Actinomyces	s__unclassified	number.1 gg_id:00000 some annotation	0	0	0	0	0	0	0	0	0	1	1	0	0	0	1	0	0	0	0	0	0	0	9	0	0	0	0	0	0	0	0	0	0	0	0	0	0	0	0	0	1
233977	k__Bacteria	p__Bacteroidetes	c__Bacteroidia	o__Bacteroidales	f__RikenellaceaeII	g__unclassified	s__unclassified	number.1 gg_id:00000 some annotation	0	0	0	0	0	0	0	0	0	0	0	0	0	0	0	0	0	0	0	0	0	0	0	0	0	0	0	0	0	0	0	0	0	0	0	0	0	0	0	0	0
13463	k__Bacteria	p__Actinobacteria	c__Actinobacteria	o__Actinomycetales	f__Corynebacteriaceae	g__Corynebacterium	s__unclassified	number.1 gg_id:00000 some annotation	0	0	0	0	0	0	0	0	0	0	0	0	0	0	0	0	0	0	0	0	0	0	0	0	0	0	0	0	1	0	0	0	0	0	0	0	0	0	0	0	0
248140	k__Bacteria	p__Bacteroidetes	c__Bacteroidia	o__Bacteroidales	f__Bacteroidaceae	g__Bacteroides	s__Bacteroides_caccae	number.1 gg_id:00000 some annotation	0	0	0	0	2	0	0	0	132	0	0	1	0	0	0	0	0	0	0	0	1	4	0	0	0	6	0	0	0	231	0	0	0	343	0	0	1	4	1	0	0
332311	k__Bacteria	p__Bacteroidetes	c__Bacteroidia	o__Bacteroidales	f__Bacteroidaceae	g__Bacteroides	s__unclassified	number.1 gg_id:00000 some annotation	0	0	0	0	0	0	0	0	0	0	0	0	0	0	0	0	0	0	0	0	0	0	0	0	0	0	0	0	0	1	0	0	0	0	0	0	0	0	0	0	0
518497	k__Bacteria	p__Proteobacteria	c__Alphaproteobacteria	o__Rhizobiales	f__Phyllobacteriaceae	g__unclassified	s__unclassified	number.1 gg_id:00000 some annotation	0	0	0	0	0	0	0	0	0	0	0	0	0	0	0	0	0	0	0	0	0	0	0	0	0	0	0	0	0	0	0	0	0	0	0	0	0	0	0	0	0
112133	k__Bacteria	p__Armatimonadetes	c__Armatimonadia	o__Armatimonadales	f__Armatimonadaceae	g__Armatimonas	s__unclassified	number.1 gg_id:00000 some annotation	0	0	0	0	0	0	0	0	0	0	0	0	0	0	0	0	0	0	0	0	0	0	0	0	0	1	0	0	0	0	0	0	0	0	0	0	0	0	0	0	0
469991	k__Bacteria	p__Firmicutes	c__Clostridia	o__Clostridiales	f__Lachnospiraceae	g__Clostridium	s__Clostridium_bolteae	number.1 gg_id:00000 some annotation	0	0	0	0	0	0	0	0	0	0	0	0	0	0	0	0	0	0	0	0	0	0	0	0	0	0	0	0	0	0	0	0	0	0	0	0	0	0	0	0	0
518474	k__Bacteria	p__Proteobacteria	c__Gammaproteobacteria	o__Legionellales	f__Legionellaceae	g__Legionella	s__unclassified	number.1 gg_id:00000 some annotation	0	0	0	0	0	0	0	0	0	0	0	0	0	0	0	0	0	0	0	0	0	0	0	0	0	0	0	0	0	0	0	0	0	0	0	0	0	0	0	0	0
9608	k__Bacteria	p__Proteobacteria	c__Gammaproteobacteria	o__Pasteurellales	f__Pasteurellaceae	g__Mannheimia	s__unclassified	number.1 gg_id:00000 some annotation	0	0	3	0	0	0	0	0	0	0	0	0	143	0	1	11	0	2	0	0	0	0	1	0	0	0	2	0	1	0	167	47	2	0	0	0	0	1	0	0	5
48207	k__Bacteria	p__Firmicutes	c__Clostridia	o__Clostridiales	f__Veillonellaceae	g__Dialister	s__unclassified	number.1 gg_id:00000 some annotation	0	0	0	0	0	0	0	0	0	0	0	0	0	0	0	0	0	0	0	0	0	0	0	0	0	0	0	0	0	0	0	0	0	0	0	0	0	0	0	0	0
240200	k__Bacteria	p__Actinobacteria	c__Actinobacteria	o__Actinomycetales	f__Microbacteriaceae	g__Candidatus_Aquiluna	s__Candidatus_Aquiluna_rubra	number.1 gg_id:00000 some annotation	0	0	0	0	0	0	0	0	0	0	0	0	0	0	0	0	0	0	0	0	0	0	0	0	0	0	0	0	0	0	0	0	0	0	0	0	0	0	0	0	0
175432	k__Bacteria	p__Firmicutes	c__Clostridia	o__Clostridiales	f__Lachnospiraceae	g__unclassified	s__unclassified	number.1 gg_id:00000 some annotation	0	0	0	0	0	0	0	0	11	0	0	0	0	0	0	0	0	0	0	0	0	0	0	0	0	0	0	0	0	0	0	0	0	0	0	0	0	0	0	0	0
222753	k__Bacteria	p__Proteobacteria	c__Gammaproteobacteria	o__Oceanospirillales	f__Alteromonadaceae	g__Cellvibrio	s__unclassified	number.1 gg_id:00000 some annotation	0	0	0	0	0	0	0	0	3	0	0	0	0	0	0	0	0	0	0	0	0	0	0	0	0	0	0	0	0	0	0	0	0	0	0	0	0	0	0	0	0
484437	k__Bacteria	p__Spirochaetes	c__Spirochaetes	o__Spirochaetales	f__Spirochaetaceae	g__Treponema	s__Treponema_medium	number.1 gg_id:00000 some annotation	0	0	0	0	0	2	0	0	0	0	0	2	0	0	0	0	0	0	0	49	1	9	19	0	0	0	0	0	0	0	4	0	0	0	4	0	1	0	0	0	0
484436	k__Bacteria	p__Proteobacteria	c__Gammaproteobacteria	o__Pseudomonadales	f__Moraxellaceae	g__Enhydrobacter	s__Enhydrobacter_aerosaccus	number.1 gg_id:00000 some annotation	0	0	0	0	0	0	1	0	0	3	0	5	0	0	0	5	1	0	0	0	0	352	0	0	0	0	0	0	1	0	1	0	0	0	0	0	0	0	0	0	0
255020	k__Bacteria	p__Bacteroidetes	c__Flavobacteria	o__Flavobacteriales	f__Flavobacteriaceae	g__Chryseobacterium	s__unclassified	number.1 gg_id:00000 some annotation	0	0	0	0	0	0	0	0	0	0	0	0	0	0	0	0	0	0	0	0	0	0	0	0	0	0	0	0	0	0	0	0	0	0	0	0	0	0	0	0	0
9514	k__Bacteria	p__Proteobacteria	c__Gammaproteobacteria	o__Pasteurellales	f__Pasteurellaceae	g__Haemophilus	s__Haemophilus_parainfluenzae	number.1 gg_id:00000 some annotation	18781	13687	11481	9451	5959	137	3463	8940	4812	2674	1016	7	1309	608	6219	1219	6	10291	103	8	300	954	54	12	1613	3	10	19887	5012	7	2016	56	1499	5	224	2375	112	126	10673	3019	24
9510	k__Bacteria	p__Proteobacteria	c__Gammaproteobacteria	o__Pasteurellales	f__Pasteurellaceae	g__unclassified	s__unclassified	number.1 gg_id:00000 some annotation	0	0	0	0	0	0	0	0	0	1	0	0	0	0	0	0	0	0	0	0	0	0	0	0	0	0	0	0	0	0	0	0	0	0	0	0	0	0	0	0	0
6233	k__Bacteria	p__Proteobacteria	c__Alphaproteobacteria	o__Sphingomonadales	f__Sphingomonadaceae	g__Sphingomonas	s__unclassified	number.1 gg_id:00000 some annotation	0	0	0	0	2	0	0	0	0	0	0	0	0	0	0	0	0	0	0	0	0	0	0	0	0	0	0	0	0	0	0	0	0	0	0	0	0	0	0	0	0
10566	k__Bacteria	p__OP11	c__OP11-2	o__WCHB1-07	f__unclassified	g__unclassified	s__unclassified	number.1 gg_id:00000 some annotation	0	0	0	0	0	0	0	0	0	0	0	0	0	0	0	0	0	0	0	0	0	0	0	0	0	0	0	0	0	0	0	0	0	0	0	0	0	0	0	0	0
44126	k__Bacteria	p__Firmicutes	c__Bacilli	o__Lactobacillales	f__Enterococcaceae	g__Enterococcus	s__unclassified	number.1 gg_id:00000 some annotation	0	0	1	0	0	0	3	0	0	0	0	0	0	0	0	0	0	0	0	0	0	0	0	0	0	2	0	0	0	0	0	0	0	0	0	0	0	0	0	0	0
99144	k__Bacteria	p__Verrucomicrobia	c__Verrucomicrobiae	o__Verrucomicrobiales	f__unclassified	g__unclassified	s__unclassified	number.1 gg_id:00000 some annotation	0	0	1	0	0	0	0	0	0	0	0	0	0	0	0	0	0	0	0	0	0	0	0	0	0	0	0	0	0	0	0	0	0	0	0	0	0	0	0	0	0
554755	k__Bacteria	p__Firmicutes	c__Bacilli	o__Lactobacillales	f__unclassified	g__unclassified	s__unclassified	number.1 gg_id:00000 some annotation	3	0	4	64	4	4	6	23	15	0	1	8	21	11	53	12	24	1	0	0	0	0	0	5	15	5	0	4	6	0	5	0	0	0	2	3	1	1	46	18	3
179289	k__Bacteria	p__Bacteroidetes	c__Sphingobacteria	o__Sphingobacteriales	f__Flexibacteraceae	g__unclassified	s__unclassified	number.1 gg_id:00000 some annotation	0	0	0	0	0	0	0	0	0	0	0	0	0	0	0	0	0	0	0	0	0	0	0	0	0	0	0	0	0	0	0	0	0	0	0	0	0	0	0	0	0
18951	k__Bacteria	p__Firmicutes	c__Bacilli	o__Lactobacillales	f__Streptococcaceae	g__Streptococcus	s__unclassified	number.1 gg_id:00000 some annotation	0	1187	11	0	0	3	5	6	69	1	2	9	6	2	0	20	3	0	0	0	0	0	0	0	0	2	0	1	0	0	0	1	0	0	9	1	0	0	2	0	3
164515	k__Bacteria	p__Proteobacteria	c__Gammaproteobacteria	o__Pasteurellales	f__Pasteurellaceae	g__unclassified	s__unclassified	number.1 gg_id:00000 some annotation	0	1	1	1	4	0	1	0	18	3	2	2	655	0	0	4	0	479	8	12	0	0	72	0	3	0	835	1	1	0	5	10264	21	0	29	0	238	0	2	0	949
211106	k__Bacteria	p__Proteobacteria	c__Alphaproteobacteria	o__Rhizobiales	f__Bradyrhizobiaceae	g__Bradyrhizobium	s__unclassified	number.1 gg_id:00000 some annotation	0	0	0	0	0	0	0	0	0	0	0	0	0	0	0	0	0	0	1	0	0	0	0	0	0	0	0	0	0	1	0	0	0	0	0	0	0	0	0	0	0
143401	k__Bacteria	p__Proteobacteria	c__Gammaproteobacteria	o__Oceanospirillales	f__Alcanivoracaceae	g__Alcanivorax	s__unclassified	number.1 gg_id:00000 some annotation	0	0	0	0	0	0	0	0	0	0	0	0	0	0	0	0	0	0	0	0	0	0	0	0	0	0	0	0	0	95	0	0	0	0	0	0	0	0	0	0	0
243150	k__Bacteria	p__Bacteroidetes	c__Bacteroidia	o__Bacteroidales	f__Rikenellaceae	g__Alistipes	s__unclassified	number.1 gg_id:00000 some annotation	0	0	0	0	0	0	0	0	0	0	0	0	0	0	0	0	0	0	0	0	0	0	0	0	0	0	0	0	0	0	0	0	0	0	0	0	0	0	0	0	0
179287	k__Bacteria	p__Firmicutes	c__Clostridia	o__Clostridiales	f__Ruminococcaceae	g__Faecalibacterium	s__Faecalibacterium_prausnitzii	number.1 gg_id:00000 some annotation	0	0	0	0	0	0	0	0	0	0	0	0	0	0	0	0	0	0	0	0	0	0	0	0	0	0	0	0	2	0	0	0	0	0	0	0	0	0	0	0	1
246692	k__Bacteria	p__Firmicutes	c__Bacilli	o__Lactobacillales	f__Leuconostocaceae	g__Leuconostoc	s__unclassified	number.1 gg_id:00000 some annotation	0	0	0	0	0	0	0	0	0	0	0	0	0	0	0	0	11	0	0	0	0	0	0	0	0	0	0	0	0	0	0	0	0	0	0	0	0	0	0	0	0
237268	k__Bacteria	p__Bacteroidetes	c__Bacteroidia	o__Bacteroidales	f__RikenellaceaeII	g__unclassified	s__unclassified	number.1 gg_id:00000 some annotation	0	0	0	0	0	0	0	0	0	0	0	0	6	1	0	0	0	0	2	0	0	0	0	0	0	0	0	0	0	0	0	0	0	0	2	0	0	0	0	0	0
470747	k__Bacteria	p__Firmicutes	c__Clostridia	o__Clostridiales	f__Lachnospiraceae	g__Oribacterium	s__unclassified	number.1 gg_id:00000 some annotation	91	0	49	264	9	1	19	266	78	20	18	0	60	168	1	105	48	0	1	0	0	0	3	3	26	100	80	1	0	0	382	1	0	0	14	4	4	248	67	19	18
293326	k__Bacteria	p__Firmicutes	c__Clostridia	o__Clostridiales	f__Lachnospiraceae	g__unclassified	s__unclassified	number.1 gg_id:00000 some annotation	0	0	0	0	0	0	0	0	0	0	0	0	0	0	0	0	0	0	0	0	0	0	1	0	0	0	0	0	0	0	0	0	0	0	0	0	0	0	0	0	0
175296	k__Bacteria	p__Firmicutes	c__Clostridia	o__Clostridiales	f__Lachnospiraceae	g__Blautia	s__unclassified	number.1 gg_id:00000 some annotation	0	0	0	0	0	0	0	0	0	0	0	0	0	0	0	0	0	0	0	0	0	0	0	0	0	0	0	0	0	0	0	0	0	1	0	0	0	0	0	0	0
255518	k__Bacteria	p__Proteobacteria	c__Betaproteobacteria	o__Burkholderiales	f__Tepidimonaceae	g__Tepidimonas	s__unclassified	number.1 gg_id:00000 some annotation	0	0	0	0	0	0	0	0	0	0	0	0	0	0	0	0	0	0	0	0	0	9	0	0	0	0	0	0	3	0	0	0	0	0	0	0	0	0	0	0	0
364234	k__Bacteria	p__Firmicutes	c__Clostridia	o__Clostridiales	f__Lachnospiraceae	g__Blautia	s__unclassified	number.1 gg_id:00000 some annotation	0	0	0	0	0	0	0	0	0	0	0	0	0	0	0	0	0	0	0	0	0	0	0	0	0	0	0	0	0	0	0	0	0	56	0	0	0	0	0	0	0
24150	k__Bacteria	p__Actinobacteria	c__Actinobacteria	o__Actinomycetales	f__Actinomycetaceae	g__unclassified	s__unclassified	number.1 gg_id:00000 some annotation	0	1	1	0	1	1	0	0	0	0	0	1	0	0	7	0	0	0	0	0	0	0	15	0	0	0	0	0	3	0	0	0	0	0	0	1	71	0	0	0	0
252398	k__Bacteria	p__Actinobacteria	c__Actinobacteria	o__Actinomycetales	f__ACK-M1	g__unclassified	s__unclassified	number.1 gg_id:00000 some annotation	0	0	0	0	0	0	0	0	0	0	0	0	0	0	0	0	0	0	0	0	0	0	0	0	0	0	0	0	0	0	0	0	0	0	0	0	0	0	0	0	0
553113	k__Bacteria	p__Bacteroidetes	c__Sphingobacteria	o__Sphingobacteriales	f__Flexibacteraceae	g__unclassified	s__unclassified	number.1 gg_id:00000 some annotation	0	0	0	0	0	0	0	0	0	0	0	0	0	0	0	0	0	0	0	0	0	0	0	0	0	0	0	0	0	0	0	0	0	0	0	0	0	0	0	0	0
351161	k__Bacteria	p__Actinobacteria	c__Actinobacteria	o__Actinomycetales	f__ACK-M1	g__unclassified	s__unclassified	number.1 gg_id:00000 some annotation	0	0	0	0	0	0	0	0	0	0	0	0	0	0	0	0	0	0	0	0	0	0	0	0	0	0	0	0	0	0	0	0	0	0	0	0	0	0	0	0	0
162913	k__Bacteria	p__Bacteroidetes	c__Bacteroidia	o__Bacteroidales	f__RikenellaceaeII	g__unclassified	s__unclassified	number.1 gg_id:00000 some annotation	0	0	0	0	0	0	0	4	948	0	6	0	1	0	0	0	0	0	0	0	0	0	0	0	0	0	0	0	0	576	0	0	0	1028	0	1	1	0	0	0	0
86715	k__Bacteria	p__Firmicutes	c__Clostridia	o__Clostridiales	f__Lachnospiraceae	g__Moryella	s__unclassified	number.1 gg_id:00000 some annotation	1	1	0	0	0	0	0	0	0	2	2	50	1	56	5	76	36	0	0	0	4	0	72	2	0	0	0	2	0	0	0	0	0	0	101	11	4	148	4	0	9
290762	k__Bacteria	p__Firmicutes	c__Clostridia	o__Clostridiales	f__Lachnospiraceae	g__unclassified	s__unclassified	number.1 gg_id:00000 some annotation	0	0	0	0	0	0	0	0	0	0	0	0	0	0	0	0	0	0	0	0	0	0	0	0	0	0	0	0	0	0	0	0	0	0	0	0	0	0	0	0	0
59574	k__Bacteria	p__Fusobacteria	c__Fusobacteria	o__Fusobacteriales	f__Fusobacteriaceae	g__Leptotrichia	s__Leptotrichia_trevisanii	number.1 gg_id:00000 some annotation	0	0	0	0	0	0	0	1	0	0	0	0	0	3	0	0	0	0	0	55	0	0	0	0	0	0	0	0	0	0	0	0	8	0	2	0	0	0	0	0	0
562526	k__Bacteria	p__Proteobacteria	c__Alphaproteobacteria	o__Sphingomonadales	f__Sphingomonadaceae	g__Sphingomonas	s__Sphingomonas_azotifigens	number.1 gg_id:00000 some annotation	0	0	0	0	0	0	0	3	0	0	0	0	0	0	0	0	0	0	0	0	0	0	0	0	0	0	0	0	0	0	0	0	0	0	0	0	0	0	0	0	0
574022	k__Bacteria	p__Actinobacteria	c__Actinobacteria	o__Actinomycetales	f__Nocardioidaceae	g__Nocardioides	s__unclassified	number.1 gg_id:00000 some annotation	0	0	0	0	0	0	0	0	0	0	0	0	0	0	0	0	0	0	0	0	0	0	0	0	0	0	0	0	0	0	0	0	0	0	0	0	0	0	0	0	0
92430	k__Bacteria	p__Firmicutes	c__Clostridia	o__Clostridiales	f__unclassified	g__unclassified	s__unclassified	number.1 gg_id:00000 some annotation	0	0	0	0	0	0	1	0	0	0	0	0	0	8	0	0	0	0	0	534	241	0	0	0	0	0	361	0	0	0	0	0	0	0	6	8	0	0	0	0	16
180944	k__Bacteria	p__Firmicutes	c__Clostridia	o__Clostridiales	f__Lachnospiraceae	g__unclassified	s__unclassified	number.1 gg_id:00000 some annotation	0	0	0	0	0	0	0	2	735	0	0	0	0	0	0	0	0	0	0	1	1	0	0	0	0	0	0	0	0	126	0	0	0	142	1	0	0	0	0	1	0
179460	k__Bacteria	p__Firmicutes	c__Clostridia	o__Clostridiales	f__Lachnospiraceae	g__Clostridium	s__unclassified	number.1 gg_id:00000 some annotation	0	0	0	0	0	0	0	0	0	0	0	1	0	0	0	0	0	0	0	0	0	0	0	0	0	0	0	0	0	0	0	0	0	0	0	0	0	0	0	0	0
108870	k__Bacteria	p__Proteobacteria	c__Alphaproteobacteria	o__Rhizobiales	f__Methylobacteriaceae	g__Methylobacterium	s__unclassified	number.1 gg_id:00000 some annotation	0	0	0	0	2	0	0	0	0	0	0	0	0	0	0	0	0	0	0	0	0	0	0	0	0	0	0	0	0	0	0	0	0	0	0	0	0	0	0	0	0
399586	k__Bacteria	p__Firmicutes	c__Clostridia	o__Clostridiales	f__unclassified	g__unclassified	s__unclassified	number.1 gg_id:00000 some annotation	0	0	0	0	0	2	1	0	0	0	0	0	22	8	0	3	0	8	0	0	0	0	0	0	0	0	127	0	0	0	0	6	0	0	5	0	0	0	0	0	62
585419	k__Bacteria	p__Firmicutes	c__Clostridia	o__Clostridiales	f__Veillonellaceae	g__Veillonella	s__unclassified	number.1 gg_id:00000 some annotation	0	0	0	0	0	0	0	0	0	0	0	0	0	37	0	0	0	0	0	0	0	0	0	0	0	0	0	0	0	0	0	0	0	0	0	21	0	0	0	0	0
212758	k__Bacteria	p__Firmicutes	c__Clostridia	o__Clostridiales	f__Catabacteriaceae	g__unclassified	s__unclassified	number.1 gg_id:00000 some annotation	0	0	0	0	0	0	0	0	21	0	0	0	0	0	0	0	0	0	0	0	0	0	0	0	0	0	0	0	0	0	0	0	0	57	0	0	0	0	0	0	0
366401	k__Bacteria	p__Firmicutes	c__Clostridia	o__Clostridiales	f__Clostridiales_Family_XI._Incertae_Sedis	g__Anaerococcus	s__unclassified	number.1 gg_id:00000 some annotation	0	0	0	0	0	0	0	0	0	0	0	0	0	1	0	0	0	0	0	0	0	0	0	0	0	0	0	0	0	0	0	0	0	0	0	0	0	0	0	0	0
540352	k__Bacteria	p__Proteobacteria	c__Betaproteobacteria	o__Neisseriales	f__Neisseriaceae	g__Neisseria	s__unclassified	number.1 gg_id:00000 some annotation	0	0	0	1	0	0	0	0	0	0	0	0	0	0	0	0	0	0	0	0	0	0	0	0	0	0	0	0	0	0	0	0	0	0	0	0	0	0	0	0	0
529659	k__Bacteria	p__Actinobacteria	c__Actinobacteria	o__Coriobacteriales	f__Coriobacteriaceae	g__Atopobium	s__unclassified	number.1 gg_id:00000 some annotation	20	1	2	5	1	1	5	10	4	8	5	91	6	50	0	55	9	0	0	3	3	0	32	52	25	2576	95	1	3	0	2	0	16	0	1302	250	2	341	52	14	177
259511	k__Bacteria	p__Firmicutes	c__Clostridia	o__Clostridiales	f__Lachnospiraceae	g__unclassified	s__unclassified	number.1 gg_id:00000 some annotation	0	0	0	0	0	0	0	0	11	0	0	0	0	0	0	0	0	0	0	0	0	0	0	0	0	0	0	0	0	0	0	0	0	0	0	0	0	0	0	0	0
13860	k__Bacteria	p__Firmicutes	c__Clostridia	o__Clostridiales	f__Veillonellaceae	g__Phascolarctobacterium	s__unclassified	number.1 gg_id:00000 some annotation	0	0	0	0	0	0	0	0	0	0	0	0	1	0	0	0	0	0	0	0	0	0	0	0	0	0	0	0	0	19	0	0	0	0	0	0	0	0	0	0	0
15076	k__Bacteria	p__Firmicutes	c__Bacilli	o__Lactobacillales	f__Aerococcaceae	g__Aerococcus	s__unclassified	number.1 gg_id:00000 some annotation	0	0	0	0	0	0	0	0	0	0	0	0	0	0	0	0	0	0	2	0	0	0	0	0	0	0	0	0	0	0	0	0	0	0	0	0	0	0	0	0	0
322059	k__Bacteria	p__Bacteroidetes	c__Bacteroidia	o__Bacteroidales	f__RikenellaceaeII	g__unclassified	s__unclassified	number.1 gg_id:00000 some annotation	0	0	0	0	0	0	0	1	28	0	0	0	0	0	0	0	0	0	0	0	0	1	0	0	0	0	0	0	0	55	0	0	0	246	0	0	0	0	0	0	0
532929	k__Bacteria	p__Bacteroidetes	c__Bacteroidia	o__Bacteroidales	f__Prevotellaceae	g__Prevotella	s__unclassified	number.1 gg_id:00000 some annotation	0	0	0	0	0	0	0	0	0	0	0	0	0	0	7	1	0	0	0	0	0	0	12	0	0	0	0	0	0	0	0	15	0	0	0	0	2	0	0	0	0
160452	k__Bacteria	p__Acidobacteria	c__Chloracidobacteria	o__unclassified	f__unclassified	g__unclassified	s__unclassified	number.1 gg_id:00000 some annotation	0	0	0	0	0	0	0	0	0	0	0	0	0	0	0	0	0	0	0	0	0	0	0	0	0	0	0	0	0	0	0	0	0	0	0	0	0	0	0	0	0
542642	k__Bacteria	p__Proteobacteria	c__Gammaproteobacteria	o__Pseudomonadales	f__Moraxellaceae	g__Acinetobacter	s__Acinetobacter_rhizosphaerae	number.1 gg_id:00000 some annotation	0	0	0	0	1	0	0	0	0	0	0	0	0	0	0	0	0	0	0	0	0	0	0	0	0	0	0	0	0	0	0	0	0	0	0	0	0	0	0	0	0
307569	k__Bacteria	p__Firmicutes	c__Clostridia	o__Clostridiales	f__Lachnospiraceae	g__unclassified	s__unclassified	number.1 gg_id:00000 some annotation	0	0	0	0	0	0	0	0	0	0	0	0	0	0	0	0	0	0	0	0	0	0	0	0	0	0	0	0	0	0	0	0	0	0	0	0	0	0	0	0	1
92501	k__Bacteria	p__Synergistetes	c__Synergistia	o__Synergistales	f__Dethiosulfovibrionaceae	g__TG5	s__unclassified	number.1 gg_id:00000 some annotation	0	0	0	0	0	0	1	1	0	0	11	1	0	25	1	0	0	0	0	54	0	108	6	0	0	4	0	1	0	0	0	0	0	0	10	3	0	0	0	0	0
338796	k__Bacteria	p__Firmicutes	c__Clostridia	o__Clostridiales	f__Ruminococcaceae	g__Oscillospira	s__unclassified	number.1 gg_id:00000 some annotation	0	0	0	0	0	0	0	1	99	0	0	0	0	0	0	0	0	0	0	0	0	0	0	0	0	0	0	0	0	0	0	0	0	0	0	0	0	0	0	0	0
575486	k__Bacteria	p__Bacteroidetes	c__Bacteroidia	o__Bacteroidales	f__Porphyromonadaceae	g__unclassified	s__unclassified	number.1 gg_id:00000 some annotation	0	0	0	0	0	0	0	0	0	0	0	0	0	0	0	0	0	0	0	0	0	0	0	0	1	0	0	0	0	0	0	0	0	0	0	0	0	0	0	0	0
388731	k__Bacteria	p__Firmicutes	c__Clostridia	o__Clostridiales	f__Ruminococcaceae	g__Ruminococcus	s__Ruminococcus_bromii	number.1 gg_id:00000 some annotation	0	0	0	0	0	0	0	0	20	0	0	0	0	0	0	0	0	0	0	0	0	0	0	0	0	0	0	0	0	44	0	0	0	0	0	0	0	0	0	0	0
245648	k__Bacteria	p__Proteobacteria	c__Alphaproteobacteria	o__Rhodobacterales	f__Rhodobacteraceae	g__Paracoccus	s__unclassified	number.1 gg_id:00000 some annotation	0	0	0	0	0	0	0	1	0	0	0	0	0	0	0	0	0	0	0	0	0	0	0	0	0	0	0	0	0	0	0	0	0	0	0	0	0	0	0	0	0
214748	k__Bacteria	p__Bacteroidetes	c__Flavobacteria	o__Flavobacteriales	f__Flavobacteriaceae	g__Chryseobacterium	s__unclassified	number.1 gg_id:00000 some annotation	0	0	0	0	0	0	0	0	0	0	1	0	0	1	0	0	0	0	0	0	0	75	0	0	0	0	0	0	0	0	0	0	0	0	0	0	0	0	0	0	0
193312	k__Bacteria	p__Firmicutes	c__Clostridia	o__Clostridiales	f__Lachnospiraceae	g__Roseburia	s__unclassified	number.1 gg_id:00000 some annotation	0	0	0	0	0	0	0	0	2	0	0	0	0	0	0	0	0	0	0	0	0	0	0	0	0	0	0	0	0	0	0	0	0	0	0	0	0	0	0	0	0
132441	k__Bacteria	p__Firmicutes	c__Clostridia	o__Clostridiales	f__Ruminococcaceae	g__unclassified	s__unclassified	number.1 gg_id:00000 some annotation	0	0	0	0	0	0	0	0	0	0	0	0	0	0	0	0	0	0	0	0	0	0	0	0	0	0	0	0	0	1	0	0	0	0	0	0	0	0	0	0	0
100126	k__Bacteria	p__Actinobacteria	c__Actinobacteria	o__Actinomycetales	f__Microbacteriaceae	g__Agromyces	s__unclassified	number.1 gg_id:00000 some annotation	0	0	0	0	0	0	0	0	0	0	0	0	0	0	0	0	0	0	0	0	0	296	0	0	0	0	0	0	0	0	0	0	0	0	0	0	1	0	0	0	0
89132	k__Bacteria	p__Firmicutes	c__Bacilli	o__Lactobacillales	f__Lactobacillaceae	g__Lactobacillus	s__unclassified	number.1 gg_id:00000 some annotation	0	0	0	0	0	0	0	0	0	0	0	0	0	0	0	0	0	0	0	0	0	0	0	0	0	0	0	0	0	0	0	0	0	0	0	0	0	0	0	0	0
521268	k__Bacteria	p__Bacteroidetes	c__Bacteroidia	o__Bacteroidales	f__Prevotellaceae	g__Prevotella	s__unclassified	number.1 gg_id:00000 some annotation	0	0	0	0	1	0	1	0	0	1	0	0	0	2	0	2	11	0	1	1	0	0	0	52	23	2	0	0	0	0	0	0	112	0	41	30	0	6	0	11	7
207340	k__Bacteria	p__Firmicutes	c__Clostridia	o__Clostridiales	f__Clostridiales_Family_XIII._Incertae_Sedis	g__Eubacterium	s__unclassified	number.1 gg_id:00000 some annotation	0	0	0	0	0	0	0	0	0	0	0	0	0	0	0	0	0	0	0	0	0	0	0	0	0	0	0	0	0	0	0	0	1	0	0	0	0	0	0	0	0
394796	k__Bacteria	p__Proteobacteria	c__Gammaproteobacteria	o__Pseudomonadales	f__Pseudomonadaceae	g__Pseudomonas	s__Pseudomonas_viridiflava	number.1 gg_id:00000 some annotation	0	0	0	0	0	0	0	2	0	0	2	0	0	0	0	0	0	0	0	0	0	0	0	0	0	0	0	0	0	0	0	0	0	0	0	0	0	1	0	0	0
250586	k__Bacteria	p__Proteobacteria	c__Gammaproteobacteria	o__Pseudomonadales	f__Pseudomonadaceae	g__Pseudomonas	s__unclassified	number.1 gg_id:00000 some annotation	0	0	0	0	0	0	0	0	0	0	0	0	0	0	0	0	0	0	0	0	0	0	0	0	0	0	0	0	0	1	0	0	0	0	0	0	0	0	0	0	0
74059	k__Bacteria	p__Fusobacteria	c__Fusobacteria	o__Fusobacteriales	f__Fusobacteriaceae	g__Leptotrichia	s__unclassified	number.1 gg_id:00000 some annotation	0	1	0	0	6	0	0	0	0	45	143	0	10	120	238	77	25	26	0	0	0	0	12	324	0	0	2	1	0	0	0	0	12	0	4	0	3	165	0	0	0
467235	k__Bacteria	p__Cyanobacteria	c__Chloroplast	o__Streptophyta	f__unclassified	g__unclassified	s__unclassified	number.1 gg_id:00000 some annotation	0	0	0	0	0	0	0	0	0	0	0	0	0	0	0	0	0	0	0	0	0	0	0	0	0	0	0	0	0	0	0	0	0	0	0	0	0	0	0	0	0
192132	k__Bacteria	p__Proteobacteria	c__Deltaproteobacteria	o__Desulfovibrionales	f__Desulfovibrionaceae	g__Bilophila	s__Bilophila_wadsworthia	number.1 gg_id:00000 some annotation	0	0	0	0	0	0	0	0	0	0	0	0	0	0	0	0	0	0	2	0	23	0	0	0	0	0	0	0	0	0	0	0	0	0	0	25	0	0	0	0	0
73021	k__Bacteria	p__Proteobacteria	c__Betaproteobacteria	o__Neisseriales	f__Neisseriaceae	g__Neisseria	s__unclassified	number.1 gg_id:00000 some annotation	1	19	0	4	45	0	461	5	44	0	0	0	147	0	0	44	0	1	0	0	0	0	0	0	1	0	25	0	0	0	0	0	43	0	8	0	0	0	0	0	122
470239	k__Bacteria	p__Firmicutes	c__Clostridia	o__Clostridiales	f__Veillonellaceae	g__Dialister	s__Dialister_invisus	number.1 gg_id:00000 some annotation	1	0	0	0	0	1	16	0	0	5	12	32	29	27	5	34	0	0	13	16	4	0	105	0	0	0	3	0	10	0	0	0	0	0	85	10	5	0	4	0	237
33919	k__Bacteria	p__Proteobacteria	c__Betaproteobacteria	o__Burkholderiales	f__Burkholderiaceae	g__Burkholderia	s__unclassified	number.1 gg_id:00000 some annotation	0	0	0	0	0	0	0	0	0	0	0	0	0	0	0	0	0	0	0	0	0	0	0	0	0	0	0	0	0	0	0	0	0	0	0	0	0	0	0	0	0
370697	k__Bacteria	p__Firmicutes	c__Clostridia	o__Clostridiales	f__Clostridiales_Family_XIII._Incertae_Sedis	g__Eubacterium	s__unclassified	number.1 gg_id:00000 some annotation	0	0	0	0	0	0	0	0	0	0	0	0	1	0	0	0	0	0	0	0	0	0	0	0	0	0	0	0	0	0	0	0	0	0	0	0	0	0	0	0	0
310479	k__Bacteria	p__Firmicutes	c__Clostridia	o__Clostridiales	f__Lachnospiraceae	g__unclassified	s__unclassified	number.1 gg_id:00000 some annotation	0	0	0	0	0	0	0	0	0	0	0	0	0	0	0	0	0	0	0	0	0	0	0	0	0	0	0	0	1	0	0	0	0	0	0	0	0	0	0	0	0
98605	k__Bacteria	p__Firmicutes	c__Bacilli	o__Lactobacillales	f__Streptococcaceae	g__Streptococcus	s__Streptococcus_sanguinis	number.1 gg_id:00000 some annotation	15	3356	60	10	462	49	91	16	137	15	7	11	212	53	17	169	5	0	1	1	0	0	57	0	4	15	2	4	56	0	2	1	4	0	8	77	88	2	86	9	183
258206	k__Bacteria	p__Firmicutes	c__Bacilli	o__Bacillales	f__Bacillaceae	g__Bacillus	s__Bacillus_flexus	number.1 gg_id:00000 some annotation	0	0	0	0	0	0	0	0	0	0	0	0	0	0	0	0	0	0	0	0	0	0	0	0	0	0	0	0	0	0	0	0	0	0	0	0	0	0	0	0	0
561316	k__Bacteria	p__Firmicutes	c__Clostridia	o__Clostridiales	f__Veillonellaceae	g__Selenomonas	s__unclassified	number.1 gg_id:00000 some annotation	0	0	0	0	0	0	0	0	0	0	0	0	0	1	0	0	0	0	0	0	1	0	0	0	0	0	0	0	0	0	0	0	0	0	0	0	0	0	0	0	0
526385	k__Bacteria	p__Proteobacteria	c__Gammaproteobacteria	o__Pseudomonadales	f__Pseudomonadaceae	g__Pseudomonas	s__Pseudomonas_stutzeri	number.1 gg_id:00000 some annotation	0	0	0	0	0	0	0	0	6	0	0	0	0	0	0	0	0	0	0	0	0	0	0	0	0	0	0	0	0	0	0	0	0	0	0	0	0	0	0	0	0
559063	k__Bacteria	p__Firmicutes	c__Clostridia	o__Clostridiales	f__Ruminococcaceae	g__unclassified	s__unclassified	number.1 gg_id:00000 some annotation	0	0	0	0	0	0	0	0	0	0	0	0	0	0	0	0	0	0	0	0	0	503	0	0	0	0	0	0	0	0	0	0	0	0	0	0	0	0	0	0	0
155215	k__Bacteria	p__Proteobacteria	c__Betaproteobacteria	o__Rhodocyclales	f__Rhodocyclaceae	g__unclassified	s__unclassified	number.1 gg_id:00000 some annotation	0	0	0	0	0	0	0	0	0	0	0	0	0	0	0	0	0	0	0	0	0	0	0	0	0	0	0	0	0	0	0	0	0	0	0	0	0	0	0	0	0
92964	k__Bacteria	p__Actinobacteria	c__Actinobacteria	o__Actinomycetales	f__Mycobacteriaceae	g__Mycobacterium	s__unclassified	number.1 gg_id:00000 some annotation	0	0	0	0	0	0	0	0	0	0	0	0	0	0	0	0	0	0	0	0	0	0	0	0	0	0	0	0	0	23	0	0	0	0	0	0	0	0	0	0	0
334656	k__Bacteria	p__Firmicutes	c__Bacilli	o__Lactobacillales	f__Enterococcaceae	g__Enterococcus	s__unclassified	number.1 gg_id:00000 some annotation	0	0	0	0	0	0	0	0	0	0	0	0	0	0	0	0	0	0	0	0	0	0	0	0	0	0	0	0	0	0	0	0	0	0	0	0	0	0	0	0	0
231028	k__Bacteria	p__Firmicutes	c__Clostridia	o__Clostridiales	f__Ruminococcaceae	g__unclassified	s__unclassified	number.1 gg_id:00000 some annotation	0	0	0	0	0	0	0	0	28	0	0	0	0	0	0	0	0	0	0	0	0	0	0	0	0	0	0	0	0	0	0	0	0	0	0	0	0	0	0	0	0
340095	k__Bacteria	p__Proteobacteria	c__Gammaproteobacteria	o__Pseudomonadales	f__Pseudomonadaceae	g__Pseudomonas	s__Pseudomonas_stutzeri	number.1 gg_id:00000 some annotation	0	0	2	0	2	0	0	1	0	1	0	0	0	0	0	0	0	0	0	0	0	0	0	0	0	0	0	0	0	0	0	0	0	0	0	0	0	0	0	0	0
104026	k__Bacteria	p__Proteobacteria	c__Betaproteobacteria	o__Neisseriales	f__Neisseriaceae	g__unclassified	s__unclassified	number.1 gg_id:00000 some annotation	0	0	0	0	0	0	0	0	0	0	0	0	0	0	0	0	0	0	0	0	0	0	0	0	0	0	0	0	0	0	0	0	0	0	0	0	0	0	0	0	0
557905	k__Bacteria	p__Proteobacteria	c__Gammaproteobacteria	o__Enterobacteriales	f__Enterobacteriaceae	g__unclassified	s__unclassified	number.1 gg_id:00000 some annotation	0	0	0	0	0	0	0	0	0	0	0	0	0	0	0	0	0	0	0	0	0	0	0	0	0	0	0	0	0	0	1	0	0	0	0	0	0	0	0	0	0
2222	k__Bacteria	p__Bacteroidetes	c__Bacteroidia	o__Bacteroidales	f__Prevotellaceae	g__Prevotella	s__Prevotella_pallens	number.1 gg_id:00000 some annotation	2	0	0	0	0	0	0	0	0	0	2	0	2	0	0	2	0	0	0	0	0	0	0	0	0	0	0	0	0	0	0	0	0	0	0	1	0	0	11	0	1
204845	k__Bacteria	p__Bacteroidetes	c__Flavobacteria	o__Flavobacteriales	f__Flavobacteriaceae	g__unclassified	s__unclassified	number.1 gg_id:00000 some annotation	0	0	0	0	0	0	0	0	0	0	0	0	0	0	0	0	0	0	0	0	0	61	0	0	0	0	0	0	0	0	0	0	0	0	3	0	0	0	0	0	0
165261	k__Bacteria	p__Firmicutes	c__Clostridia	o__Clostridiales	f__Ruminococcaceae	g__Clostridium	s__Flavonifractor_plautii	number.1 gg_id:00000 some annotation	0	0	0	0	0	0	0	0	1	0	0	0	0	0	0	0	0	0	0	0	0	0	0	0	0	0	0	0	0	0	0	0	0	132	0	0	0	0	0	0	0
65940	k__Bacteria	p__Proteobacteria	c__Gammaproteobacteria	o__Cardiobacteriales	f__Cardiobacteriaceae	g__Cardiobacterium	s__unclassified	number.1 gg_id:00000 some annotation	0	0	0	0	0	0	1	0	0	0	0	0	0	0	0	0	0	0	0	0	0	0	1	0	0	0	0	0	0	0	0	0	0	0	0	0	9	0	0	0	0
328422	k__Bacteria	p__Firmicutes	c__Clostridia	o__Clostridiales	f__Lachnospiraceae	g__Coprococcus	s__unclassified	number.1 gg_id:00000 some annotation	0	0	0	0	0	0	0	0	0	0	0	0	0	0	0	0	0	0	0	0	0	0	0	0	0	0	0	0	0	0	0	0	0	0	0	0	0	0	0	0	1
244198	k__Bacteria	p__Bacteroidetes	c__Bacteroidia	o__Bacteroidales	f__unclassified	g__unclassified	s__unclassified	number.1 gg_id:00000 some annotation	0	0	0	0	1	0	0	0	16	0	0	0	8	0	0	0	0	1	0	1022	0	50	0	1	0	0	0	0	16	0	0	0	0	0	48	0	0	0	1	0	0
227475	k__Bacteria	p__Firmicutes	c__Clostridia	o__Clostridiales	f__Lachnospiraceae	g__Butyrivibrio	s__unclassified	number.1 gg_id:00000 some annotation	0	0	0	0	0	0	0	0	0	0	0	0	0	0	0	11	0	0	0	0	0	0	0	0	0	0	0	0	0	0	0	0	0	0	0	0	0	0	0	0	6
539235	k__Bacteria	p__Bacteroidetes	c__Sphingobacteria	o__Sphingobacteriales	f__Flexibacteraceae	g__unclassified	s__unclassified	number.1 gg_id:00000 some annotation	0	0	0	0	0	0	0	0	0	0	0	0	0	0	0	0	0	0	0	0	0	0	0	0	0	0	0	0	0	0	0	0	0	0	0	0	0	0	0	0	0
305729	k__Bacteria	p__Proteobacteria	c__Alphaproteobacteria	o__Rhizobiales	f__Methylobacteriaceae	g__Methylobacterium	s__Methylobacterium_radiotolerans	number.1 gg_id:00000 some annotation	0	0	0	0	0	0	0	0	0	0	0	0	0	0	0	0	0	0	0	0	0	0	0	0	0	0	0	0	0	0	0	0	0	2	0	0	0	0	0	0	0
149109	k__Bacteria	p__Firmicutes	c__Bacilli	o__Lactobacillales	f__Streptococcaceae	g__Streptococcus	s__unclassified	number.1 gg_id:00000 some annotation	0	0	0	2	0	0	0	1	0	0	0	1	0	0	5	0	0	0	0	0	0	2	0	0	0	1	0	0	0	0	0	0	0	0	0	0	0	0	0	2	2
261097	k__Bacteria	p__Firmicutes	c__Clostridia	o__Clostridiales	f__Lachnospiraceae	g__unclassified	s__unclassified	number.1 gg_id:00000 some annotation	0	0	0	0	0	0	0	0	0	0	0	0	0	0	0	0	0	0	0	0	0	0	0	0	0	0	0	0	0	0	0	0	0	2	0	0	0	0	0	0	0
152869	k__Bacteria	p__Actinobacteria	c__Actinobacteria	o__Actinomycetales	f__Actinomycetaceae	g__unclassified	s__unclassified	number.1 gg_id:00000 some annotation	0	0	0	0	0	0	0	1	0	0	0	1	0	0	0	0	0	0	0	0	0	0	0	0	0	0	0	0	0	0	0	0	0	0	0	0	0	0	0	0	0
26061	k__Bacteria	p__Actinobacteria	c__Actinobacteria	o__Actinomycetales	f__Actinomycetaceae	g__Actinomyces	s__unclassified	number.1 gg_id:00000 some annotation	0	0	0	0	0	0	0	0	0	12	0	1	0	1	2	5	0	0	0	0	0	0	234	0	0	1	0	0	0	0	0	0	0	0	0	2	7	0	0	0	1
248771	k__Bacteria	p__Proteobacteria	c__Gammaproteobacteria	o__Chromatiales	f__Sinobacteraceae	g__Steroidobacter	s__unclassified	number.1 gg_id:00000 some annotation	0	0	0	0	0	0	0	0	0	0	0	0	0	0	0	0	2	0	0	0	0	0	0	0	0	0	0	0	0	0	0	0	0	0	0	0	0	0	0	0	0
345575	k__Bacteria	p__Firmicutes	c__Bacilli	o__Lactobacillales	f__Streptococcaceae	g__Lactococcus	s__Lactococcus_lactis	number.1 gg_id:00000 some annotation	0	0	0	0	0	0	0	0	0	0	0	0	2	0	0	0	1	0	0	0	0	0	0	0	0	0	0	3	2	0	0	2	0	43	0	0	0	0	0	0	0
310265	k__Bacteria	p__Proteobacteria	c__Gammaproteobacteria	o__Enterobacteriales	f__Enterobacteriaceae	g__unclassified	s__unclassified	number.1 gg_id:00000 some annotation	0	0	0	0	0	0	0	0	0	0	0	0	0	0	0	0	0	0	0	0	0	3	0	0	0	0	0	0	0	2	0	0	0	3	0	0	0	0	0	0	0
534507	k__Bacteria	p__Actinobacteria	c__Actinobacteria	o__Actinomycetales	f__Corynebacteriaceae	g__Corynebacterium	s__unclassified	number.1 gg_id:00000 some annotation	0	0	0	0	0	0	0	0	0	0	0	0	0	1	0	0	0	0	0	0	0	0	0	0	0	0	0	0	0	0	0	0	0	0	0	0	0	0	0	0	0
128382	k__Bacteria	p__Firmicutes	c__Clostridia	o__Clostridiales	f__Veillonellaceae	g__Dialister	s__unclassified	number.1 gg_id:00000 some annotation	0	0	0	0	0	0	0	0	0	0	0	0	0	0	0	0	0	0	0	0	0	0	0	0	0	0	0	0	0	0	0	0	0	0	0	0	0	0	0	0	0
404318	k__Bacteria	p__Bacteroidetes	c__Bacteroidia	o__Bacteroidales	f__Prevotellaceae	g__Prevotella	s__unclassified	number.1 gg_id:00000 some annotation	0	1	0	0	0	0	0	0	0	0	0	0	0	0	0	0	0	0	0	1	0	0	0	0	0	0	0	0	0	0	0	0	0	0	6	0	0	0	0	0	0
183225	k__Bacteria	p__Firmicutes	c__Clostridia	o__Clostridiales	f__Lachnospiraceae	g__unclassified	s__unclassified	number.1 gg_id:00000 some annotation	0	0	0	0	0	0	0	0	0	0	0	0	0	0	0	0	0	0	0	0	0	0	0	0	0	0	0	0	0	3	0	0	0	0	0	0	0	0	0	0	0
536014	k__Bacteria	p__Firmicutes	c__Bacilli	o__unclassified	f__unclassified	g__unclassified	s__unclassified	number.1 gg_id:00000 some annotation	0	0	0	0	0	0	0	0	0	0	0	1	0	0	1	0	0	0	0	0	0	0	0	0	1	0	0	0	0	0	0	0	0	0	0	0	0	0	0	0	0
200741	k__Bacteria	p__Proteobacteria	c__Betaproteobacteria	o__Burkholderiales	f__Comamonadaceae	g__unclassified	s__unclassified	number.1 gg_id:00000 some annotation	0	0	1	0	0	0	0	0	0	0	0	0	0	0	0	0	0	0	0	0	0	0	0	0	0	0	0	0	0	0	0	0	0	0	0	0	0	0	0	0	0
342392	k__Bacteria	p__Bacteroidetes	c__Bacteroidia	o__Bacteroidales	f__RikenellaceaeII	g__unclassified	s__unclassified	number.1 gg_id:00000 some annotation	0	0	0	0	0	0	0	0	0	0	0	0	0	0	0	0	0	0	0	0	0	0	0	0	0	0	0	0	0	0	0	0	0	0	0	0	0	0	0	0	0
246356	k__Bacteria	p__Proteobacteria	c__Deltaproteobacteria	o__Myxococcales	f__Haliangiaceae	g__unclassified	s__unclassified	number.1 gg_id:00000 some annotation	0	0	0	0	0	0	0	0	0	0	0	0	0	0	0	0	0	0	0	0	0	37	0	0	0	0	0	0	0	0	0	0	0	0	0	0	0	0	0	0	0
342397	k__Bacteria	p__Firmicutes	c__Clostridia	o__Clostridiales	f__Lachnospiraceae	g__Ruminococcus	s__Ruminococcus_gnavus	number.1 gg_id:00000 some annotation	0	0	0	0	0	0	0	0	0	0	0	0	0	0	0	0	0	0	0	0	0	0	0	0	0	0	0	0	0	0	0	0	0	0	0	0	0	0	0	0	0
7954	k__Bacteria	p__Proteobacteria	c__Gammaproteobacteria	o__Legionellales	f__Legionellaceae	g__Legionella	s__unclassified	number.1 gg_id:00000 some annotation	0	0	0	0	0	0	0	0	0	0	0	0	0	0	0	0	0	0	0	0	0	0	0	0	0	0	0	0	0	0	0	0	0	0	0	0	0	0	0	0	0
39819	k__Bacteria	p__Proteobacteria	c__Gammaproteobacteria	o__Pseudomonadales	f__Moraxellaceae	g__Acinetobacter	s__unclassified	number.1 gg_id:00000 some annotation	0	0	0	0	0	0	0	0	0	0	0	0	0	0	0	0	0	0	0	0	0	0	0	0	0	0	0	0	0	0	0	0	0	0	0	0	0	0	0	0	0
539347	k__Bacteria	p__Bacteroidetes	c__Bacteroidia	o__Bacteroidales	f__Prevotellaceae	g__Prevotella	s__unclassified	number.1 gg_id:00000 some annotation	0	0	0	0	0	0	0	0	0	0	0	5	2	61	1	43	0	0	1	68	20	0	5	0	0	0	1	1	0	0	0	0	4	0	95	25	4	0	0	0	31
71907	k__Bacteria	p__Bacteroidetes	c__Bacteroidia	o__Bacteroidales	f__Prevotellaceae	g__Prevotella	s__unclassified	number.1 gg_id:00000 some annotation	0	0	0	0	0	0	0	0	0	0	0	0	0	2	0	0	0	0	0	1	0	0	0	0	0	0	0	0	0	0	0	0	0	0	0	0	0	0	0	0	0
470993	k__Bacteria	p__Firmicutes	c__Clostridia	o__Clostridiales	f__Veillonellaceae	g__Selenomonas	s__unclassified	number.1 gg_id:00000 some annotation	0	0	0	0	0	0	1	0	0	4	11	0	11	142	3	7	1	0	1	92	311	68	193	18	0	0	2	1	0	0	0	0	31	0	9	11	4	130	0	2	5
68353	k__Bacteria	p__Bacteroidetes	c__Bacteroidia	o__Bacteroidales	f__RikenellaceaeII	g__unclassified	s__unclassified	number.1 gg_id:00000 some annotation	0	0	0	0	0	0	0	0	0	0	0	0	0	0	0	0	0	0	0	7	0	0	0	0	0	0	0	0	0	0	0	0	0	0	0	0	0	0	0	0	0
278440	k__Bacteria	p__Firmicutes	c__Clostridia	o__Clostridiales	f__Lachnospiraceae	g__unclassified	s__unclassified	number.1 gg_id:00000 some annotation	0	0	0	0	0	0	0	0	42	0	0	0	0	0	0	0	0	0	0	0	0	0	0	0	0	0	0	0	0	0	0	0	0	0	0	0	0	0	0	0	0
9562	k__Bacteria	p__Proteobacteria	c__Gammaproteobacteria	o__Pasteurellales	f__Pasteurellaceae	g__Haemophilus	s__unclassified	number.1 gg_id:00000 some annotation	66	72	73	42	44	0	21	27	34	23	9	1	9	1	43	6	0	49	1	0	2	5	1	0	12	0	0	79	22	0	9	0	8	0	1	18	1	0	28	15	0
10526	k__Bacteria	p__Proteobacteria	c__Deltaproteobacteria	o__Desulfovibrionales	f__Desulfovibrionaceae	g__Desulfovibrio	s__Desulfovibrio_desulfuricans	number.1 gg_id:00000 some annotation	0	0	0	0	0	0	0	0	0	0	0	0	0	0	0	0	0	0	0	0	0	0	0	0	0	0	0	0	0	0	0	0	0	0	0	0	0	0	0	0	0
164837	k__Bacteria	p__Firmicutes	c__Clostridia	o__Clostridiales	f__unclassified	g__unclassified	s__unclassified	number.1 gg_id:00000 some annotation	0	0	0	0	0	0	0	0	15	0	0	0	0	0	0	0	0	0	0	0	0	0	0	0	0	0	0	0	0	0	0	0	0	0	0	0	0	0	0	0	0
7316	k__Bacteria	p__Proteobacteria	c__Betaproteobacteria	o__Burkholderiales	f__Oxalobacteraceae	g__Massilia	s__Massilia_timonae	number.1 gg_id:00000 some annotation	0	0	0	0	0	0	0	0	0	0	0	0	0	0	0	0	0	0	0	0	0	0	0	0	0	0	0	0	0	0	0	0	0	1	0	0	0	0	0	0	0
164830	k__Bacteria	p__Proteobacteria	c__Alphaproteobacteria	o__Sphingomonadales	f__Sphingomonadaceae	g__unclassified	s__unclassified	number.1 gg_id:00000 some annotation	0	0	1	0	0	0	0	0	0	0	0	0	0	0	0	0	0	0	0	0	0	0	0	0	0	0	0	0	0	0	0	0	0	0	0	0	0	0	0	0	0
329483	k__Bacteria	p__Firmicutes	c__Clostridia	o__Clostridiales	f__Lachnospiraceae	g__unclassified	s__unclassified	number.1 gg_id:00000 some annotation	0	0	0	0	0	0	0	2	28	0	0	0	0	0	0	0	0	0	0	0	0	0	0	0	0	0	0	0	0	0	0	0	0	0	0	0	0	0	0	0	0
141709	k__Bacteria	p__Proteobacteria	c__Betaproteobacteria	o__Burkholderiales	f__Comamonadaceae	g__unclassified	s__unclassified	number.1 gg_id:00000 some annotation	1	1	22	0	30	16	10	1	96	4	10	4	7	3	2	24	17	0	0	0	0	2434	7	0	0	26	0	1	66	120	0	0	1	0	0	0	1	0	0	1	12
133472	k__Bacteria	p__Bacteroidetes	c__Bacteroidia	o__Bacteroidales	f__RikenellaceaeII	g__unclassified	s__unclassified	number.1 gg_id:00000 some annotation	0	0	0	0	0	0	0	0	1	0	0	0	0	0	0	0	0	0	0	0	0	0	0	0	0	0	0	0	0	0	0	0	0	0	0	0	0	0	0	0	0
198239	k__Bacteria	p__Proteobacteria	c__Gammaproteobacteria	o__Enterobacteriales	f__Enterobacteriaceae	g__Escherichia	s__unclassified	number.1 gg_id:00000 some annotation	0	0	0	0	0	0	0	0	0	0	0	0	0	0	0	0	0	0	0	0	0	0	0	0	0	0	0	0	0	0	0	0	0	0	0	0	0	0	0	0	0
470178	k__Bacteria	p__Actinobacteria	c__Actinobacteria	o__Actinomycetales	f__Corynebacteriaceae	g__Corynebacterium	s__unclassified	number.1 gg_id:00000 some annotation	0	0	0	0	0	1	0	0	0	0	0	0	0	1	0	0	0	0	0	0	0	0	1	0	0	0	0	0	0	0	0	0	0	0	0	0	0	1	0	0	0
335530	k__Bacteria	p__Bacteroidetes	c__Bacteroidia	o__Bacteroidales	f__Rikenellaceae	g__Alistipes	s__unclassified	number.1 gg_id:00000 some annotation	0	0	0	0	0	0	0	0	0	0	0	0	0	0	0	0	0	0	0	0	0	0	0	0	0	0	0	0	0	49	0	0	0	6	0	0	0	0	0	1	0
70974	k__Bacteria	p__Proteobacteria	c__Gammaproteobacteria	o__Pasteurellales	f__Pasteurellaceae	g__Haemophilus	s__Haemophilus_influenzae	number.1 gg_id:00000 some annotation	355	316	1462	48	16785	25	847	29	118	15676	16466	3	42	185	454	598	1	17	1809	6	369	626	634	501	1212	0	2	23	242	0	15	40	255	3	73	5557	174	289	1825	50	266
178252	k__Bacteria	p__Firmicutes	c__Clostridia	o__Clostridiales	f__Ruminococcaceae	g__unclassified	s__unclassified	number.1 gg_id:00000 some annotation	0	0	0	0	0	0	0	0	0	0	0	0	0	0	0	0	0	0	0	0	0	0	0	0	0	0	0	0	0	0	0	0	0	0	0	0	0	0	0	0	0
160031	k__Bacteria	p__Firmicutes	c__Bacilli	o__Lactobacillales	f__Lactobacillaceae	g__Lactobacillus	s__Lactobacillus_delbrueckii	number.1 gg_id:00000 some annotation	0	0	0	0	0	0	0	0	0	0	0	0	0	0	0	0	0	0	0	0	0	0	0	0	0	1	0	0	0	0	0	0	0	0	0	0	0	0	0	0	0
48583	k__Bacteria	p__Firmicutes	c__Clostridia	o__Clostridiales	f__Lachnospiraceae	g__Catonella	s__unclassified	number.1 gg_id:00000 some annotation	3	0	5	20	0	1	8	5	0	8	7	1	26	14	3	22	7	1	285	574	181	85	42	13	0	0	245	0	0	0	12	54	0	0	14	2	5	71	18	0	13
278712	k__Bacteria	p__Bacteroidetes	c__Bacteroidia	o__Bacteroidales	f__RikenellaceaeII	g__unclassified	s__unclassified	number.1 gg_id:00000 some annotation	0	0	0	0	0	0	0	0	4	0	0	0	0	0	0	0	0	0	0	0	0	0	0	0	0	0	0	0	0	0	0	0	0	0	0	0	0	0	0	0	0
522283	k__Bacteria	p__Proteobacteria	c__Alphaproteobacteria	o__Rhodobacterales	f__Rhodobacteraceae	g__unclassified	s__unclassified	number.1 gg_id:00000 some annotation	0	0	0	0	0	1	0	0	0	0	0	0	0	0	0	0	0	0	0	0	0	0	0	0	0	0	0	0	0	0	0	0	0	0	0	0	0	0	0	0	0
511532	k__Bacteria	p__Firmicutes	c__Bacilli	o__Lactobacillales	f__Streptococcaceae	g__Streptococcus	s__unclassified	number.1 gg_id:00000 some annotation	0	0	3	2	0	6	2	3	3	1	2	1	2	1	1	2	1	0	0	0	0	0	0	0	0	0	0	2	2	0	0	0	0	0	1	1	0	1	2	0	4
344400	k__Bacteria	p__Firmicutes	c__Clostridia	o__Clostridiales	f__Lachnospiraceae	g__unclassified	s__unclassified	number.1 gg_id:00000 some annotation	0	0	0	0	0	0	0	0	0	0	0	0	0	0	0	0	0	0	0	0	0	0	0	0	0	0	0	0	0	2	0	0	0	0	0	0	0	0	0	0	0
86707	k__Bacteria	p__Firmicutes	c__Clostridia	o__Clostridiales	f__Veillonellaceae	g__Selenomonas	s__unclassified	number.1 gg_id:00000 some annotation	0	0	0	0	0	0	0	0	0	0	0	1	0	67	0	0	0	0	0	0	1	0	0	0	0	0	0	0	0	0	0	0	0	0	0	2	0	0	1	0	0
568929	k__Bacteria	p__Firmicutes	c__Bacilli	o__Lactobacillales	f__Streptococcaceae	g__Streptococcus	s__unclassified	number.1 gg_id:00000 some annotation	0	0	0	0	0	0	0	0	0	0	0	0	0	1	0	0	0	0	0	0	0	0	0	0	0	1	0	0	0	0	0	0	0	0	0	0	0	0	0	0	0
59566	k__Bacteria	p__Firmicutes	c__Bacilli	o__Lactobacillales	f__Streptococcaceae	g__Streptococcus	s__unclassified	number.1 gg_id:00000 some annotation	0	89	52	3	11	82	45	12	15	25	21	11	34	18	5	17	17	3	0	9	0	3	0	0	0	1	0	23	4	0	2	3	2	0	19	22	7	6	43	1	47
562530	k__Bacteria	p__Proteobacteria	c__Alphaproteobacteria	o__Rhodobacterales	f__Rhodobacteraceae	g__Rhodobacter	s__unclassified	number.1 gg_id:00000 some annotation	0	0	0	0	0	0	0	0	0	0	0	0	0	0	0	0	0	0	0	0	0	0	0	0	0	0	0	0	0	0	0	0	0	0	0	0	0	0	0	0	0
71888	k__Bacteria	p__Actinobacteria	c__Actinobacteria	o__Actinomycetales	f__Actinomycetaceae	g__Actinobaculum	s__Actinobaculum_massiliense	number.1 gg_id:00000 some annotation	0	0	0	0	0	0	0	0	0	0	0	0	0	0	0	0	0	0	1	0	0	0	0	0	0	0	0	0	0	0	0	0	0	0	0	0	0	0	0	0	0
407036	k__Bacteria	p__Firmicutes	c__Clostridia	o__Clostridiales	f__Clostridiales_Family_XI._Incertae_Sedis	g__Anaerococcus	s__unclassified	number.1 gg_id:00000 some annotation	0	0	0	0	0	0	0	0	0	0	0	0	0	1	0	0	0	0	0	0	0	0	0	0	0	0	0	0	0	0	0	0	0	0	0	0	0	0	0	0	0
66308	k__Bacteria	p__Firmicutes	c__Bacilli	o__Lactobacillales	f__Streptococcaceae	g__Streptococcus	s__unclassified	number.1 gg_id:00000 some annotation	47	48	54	333	14	48	82	89	36	77	19	191	285	681	472	182	241	3	0	0	10	4	74	0	54	110	0	95	73	1	90	2	23	1	18	364	288	18	209	102	59
77934	k__Bacteria	p__Firmicutes	c__Bacilli	o__Bacillales	f__Paenibacillaceae	g__Paenibacillus	s__Paenibacillus_chondroitinus	number.1 gg_id:00000 some annotation	0	1	0	0	0	0	0	0	0	0	0	0	0	0	0	0	0	0	0	0	0	0	0	0	0	0	0	0	0	0	0	0	0	0	0	0	0	0	0	0	0
108861	k__Bacteria	p__Cyanobacteria	c__Chloroplast	o__Streptophyta	f__unclassified	g__unclassified	s__unclassified	number.1 gg_id:00000 some annotation	0	0	0	0	0	0	0	0	0	0	0	0	0	0	0	0	0	0	0	0	0	1	0	0	0	0	0	0	0	0	0	0	0	1	0	0	0	0	0	0	0
194641	k__Bacteria	p__Proteobacteria	c__Gammaproteobacteria	o__Pseudomonadales	f__Moraxellaceae	g__Acinetobacter	s__unclassified	number.1 gg_id:00000 some annotation	0	0	0	0	0	0	0	0	0	0	0	0	0	0	0	0	0	0	0	0	0	2	0	0	0	0	0	0	0	0	0	0	0	0	0	0	0	0	0	0	0
71799	k__Bacteria	p__Bacteroidetes	c__Bacteroidia	o__Bacteroidales	f__Prevotellaceae	g__Prevotella	s__unclassified	number.1 gg_id:00000 some annotation	0	0	0	0	0	0	0	0	0	0	0	0	0	1	0	0	0	0	0	0	1	0	0	0	0	0	0	0	0	0	0	0	0	0	1	0	0	0	0	0	0
258906	k__Bacteria	p__Firmicutes	c__Clostridia	o__Clostridiales	f__Lachnospiraceae	g__Clostridium	s__Clostridium_scindens	number.1 gg_id:00000 some annotation	0	0	0	0	0	0	0	0	0	0	0	0	0	0	0	0	0	0	0	0	0	0	0	0	0	0	0	0	0	0	0	0	0	0	0	0	0	0	0	0	0
232778	k__Bacteria	p__Firmicutes	c__Clostridia	o__Clostridiales	f__Lachnospiraceae	g__unclassified	s__unclassified	number.1 gg_id:00000 some annotation	0	0	0	0	0	0	0	0	0	0	0	0	0	0	0	0	0	0	0	0	0	0	0	0	0	0	0	0	0	0	0	0	0	0	0	0	0	0	0	0	0
331150	k__Bacteria	p__Firmicutes	c__Clostridia	o__Clostridiales	f__Lachnospiraceae	g__Clostridium	s__unclassified	number.1 gg_id:00000 some annotation	0	1	0	0	0	0	0	0	0	0	0	0	0	0	0	0	0	0	0	0	0	0	0	0	0	0	0	0	0	0	0	0	0	0	0	0	0	0	0	0	0
579141	k__Bacteria	p__Proteobacteria	c__Gammaproteobacteria	o__Pasteurellales	f__Pasteurellaceae	g__unclassified	s__unclassified	number.1 gg_id:00000 some annotation	0	0	0	0	0	0	0	0	0	0	0	0	0	0	0	1	0	0	0	0	0	0	0	0	0	0	0	0	0	0	1	0	0	0	0	0	0	0	0	0	0
439353	k__Bacteria	p__Proteobacteria	c__Alphaproteobacteria	o__unclassified	f__unclassified	g__unclassified	s__unclassified	number.1 gg_id:00000 some annotation	0	0	0	0	0	0	0	0	0	0	0	0	2	0	0	0	0	0	0	0	0	0	0	0	0	0	0	0	0	0	0	0	0	0	0	0	0	0	0	0	0
137557	k__Bacteria	p__Firmicutes	c__Bacilli	o__unclassified	f__unclassified	g__unclassified	s__unclassified	number.1 gg_id:00000 some annotation	0	0	0	2	0	0	0	1	0	0	0	0	0	0	1	2	1	0	0	0	0	0	0	0	1	0	0	0	0	0	0	0	0	0	0	0	0	0	1	0	0
188495	k__Bacteria	p__Bacteroidetes	c__Bacteroidia	o__Bacteroidales	f__RikenellaceaeII	g__unclassified	s__unclassified	number.1 gg_id:00000 some annotation	0	0	0	0	0	0	0	0	0	0	0	0	0	0	0	0	0	0	0	0	0	0	0	0	0	0	0	0	0	0	0	0	0	0	0	0	0	0	0	0	0
369164	k__Bacteria	p__Firmicutes	c__Clostridia	o__Clostridiales	f__Lachnospiraceae	g__Roseburia	s__unclassified	number.1 gg_id:00000 some annotation	0	0	0	0	0	0	0	0	0	0	0	0	0	0	0	0	0	0	0	0	0	0	0	0	0	0	0	0	0	0	0	0	0	0	0	0	0	0	0	0	0
192814	k__Bacteria	p__Bacteroidetes	c__Bacteroidia	o__Bacteroidales	f__Prevotellaceae	g__Prevotella	s__unclassified	number.1 gg_id:00000 some annotation	0	0	0	0	0	0	0	0	0	0	0	44	169	0	6	0	0	1	10	9	9	117	5	0	0	0	0	0	0	0	0	0	0	0	26	37	0	0	0	0	0
531978	k__Bacteria	p__Proteobacteria	c__Gammaproteobacteria	o__Enterobacteriales	f__Enterobacteriaceae	g__unclassified	s__unclassified	number.1 gg_id:00000 some annotation	0	0	0	0	0	0	0	0	0	0	0	0	0	0	0	0	0	0	0	0	0	0	0	0	0	0	0	0	0	0	0	0	0	0	0	0	0	0	0	0	0
471156	k__Bacteria	p__Bacteroidetes	c__Bacteroidia	o__Bacteroidales	f__Prevotellaceae	g__Prevotella	s__unclassified	number.1 gg_id:00000 some annotation	3	0	0	4	0	3	9	3	1	36	61	22	16	610	9	445	7	14	0	31	135	1	64	8	3	986	2	4	5	0	0	1	11	0	2617	7056	1	3142	16	0	56
471157	k__Bacteria	p__Actinobacteria	c__Actinobacteria	o__Coriobacteriales	f__Coriobacteriaceae	g__Slackia	s__Slackia_exigua	number.1 gg_id:00000 some annotation	1	0	0	0	0	0	0	0	0	0	1	0	1	0	0	0	0	0	0	0	0	0	0	0	0	0	1	0	0	0	0	0	0	0	0	0	0	0	0	0	1
72858	k__Bacteria	p__Actinobacteria	c__Actinobacteria	o__Bifidobacteriales	f__Bifidobacteriaceae	g__Alloscardovia	s__Alloscardovia_omnicolens	number.1 gg_id:00000 some annotation	0	0	0	0	0	0	0	0	0	0	0	0	0	0	0	0	0	0	2	0	0	0	0	0	0	12	0	0	0	0	0	0	0	1	163	0	0	0	0	0	0
107290	k__Bacteria	p__Proteobacteria	c__Betaproteobacteria	o__Burkholderiales	f__Comamonadaceae	g__unclassified	s__unclassified	number.1 gg_id:00000 some annotation	0	0	0	0	0	0	0	0	0	0	0	0	0	0	0	0	0	0	0	0	0	0	0	0	0	0	0	0	0	0	0	0	0	0	0	0	0	0	0	0	0
92289	k__Bacteria	p__Actinobacteria	c__Actinobacteria	o__Actinomycetales	f__Actinomycetaceae	g__Actinomyces	s__unclassified	number.1 gg_id:00000 some annotation	0	0	0	0	0	0	0	0	0	0	0	1	0	29	0	2	3	0	0	0	0	0	53	0	0	0	0	0	0	0	0	0	0	0	0	3	16	0	4	0	0
22635	k__Bacteria	p__Bacteroidetes	c__Bacteroidia	o__Bacteroidales	f__Porphyromonadaceae	g__Tannerella	s__Tannerella_forsythia	number.1 gg_id:00000 some annotation	0	0	0	1	0	0	6	0	0	11	61	0	17	22	1	1	0	0	0	4	30	0	0	0	0	0	5	0	0	0	0	0	1	0	11	0	0	0	0	0	9
544531	k__Bacteria	p__Bacteroidetes	c__Bacteroidia	o__Bacteroidales	f__Prevotellaceae	g__Prevotella	s__Prevotella_oulorum	number.1 gg_id:00000 some annotation	0	0	2	1	0	0	4	0	17	0	0	33	10	232	8	9	0	2	0	33	134	0	40	3	0	0	0	0	0	0	0	0	5	0	59	231	4	114	0	0	53
549577	k__Bacteria	p__Firmicutes	c__Clostridia	o__Clostridiales	f__Catabacteriaceae	g__unclassified	s__unclassified	number.1 gg_id:00000 some annotation	0	0	0	0	0	0	0	0	0	0	0	0	0	0	0	0	0	0	0	0	0	0	0	0	0	0	0	0	0	260	0	0	0	0	0	0	0	0	0	0	1
23235	k__Bacteria	p__Actinobacteria	c__Actinobacteria	o__Actinomycetales	f__Actinomycetaceae	g__Actinomyces	s__unclassified	number.1 gg_id:00000 some annotation	0	0	0	0	0	0	0	0	0	0	0	0	0	0	0	0	0	0	0	0	0	0	0	0	0	0	0	0	0	0	0	0	0	0	0	0	0	0	0	0	0
564978	k__Bacteria	p__Acidobacteria	c__Chloracidobacteria	o__unclassified	f__unclassified	g__unclassified	s__unclassified	number.1 gg_id:00000 some annotation	0	0	0	0	0	0	0	0	0	0	0	0	0	0	0	0	0	0	0	0	0	0	0	0	0	0	0	0	0	0	0	0	0	0	0	0	0	0	0	0	0
6402	k__Bacteria	p__Proteobacteria	c__Betaproteobacteria	o__Neisseriales	f__Neisseriaceae	g__unclassified	s__unclassified	number.1 gg_id:00000 some annotation	0	0	0	0	0	0	0	0	0	0	1	0	0	0	0	0	0	0	0	0	5	0	1	0	0	0	0	0	1	0	0	0	0	0	0	0	0	0	0	0	1
7765	k__Bacteria	p__Proteobacteria	c__Gammaproteobacteria	o__Cardiobacteriales	f__Cardiobacteriaceae	g__Cardiobacterium	s__Cardiobacterium_valvarum	number.1 gg_id:00000 some annotation	0	0	0	0	1	0	2	0	0	0	0	0	12	0	0	0	0	0	0	0	0	0	15	0	0	0	0	0	0	0	0	0	0	0	1	0	81	0	0	0	0
266639	k__Bacteria	p__Firmicutes	c__Clostridia	o__Clostridiales	f__Lachnospiraceae	g__unclassified	s__unclassified	number.1 gg_id:00000 some annotation	0	0	0	0	0	0	0	0	1	0	0	0	0	0	0	0	0	0	0	0	0	0	0	0	0	0	0	0	0	0	0	0	0	0	0	0	0	0	0	0	0
47698	k__Bacteria	p__Proteobacteria	c__Deltaproteobacteria	o__Desulfobacterales	f__Desulfobulbaceae	g__Desulfobulbus	s__unclassified	number.1 gg_id:00000 some annotation	0	0	0	0	0	0	0	0	0	0	8	0	0	0	0	0	0	0	0	0	0	0	0	0	0	1	0	0	0	0	0	0	0	0	0	0	0	0	0	0	0
440617	k__Bacteria	p__Bacteroidetes	c__Bacteroidia	o__Bacteroidales	f__RikenellaceaeII	g__unclassified	s__unclassified	number.1 gg_id:00000 some annotation	0	0	0	0	0	0	0	0	0	0	0	0	0	0	0	0	0	0	0	0	0	0	0	0	0	0	0	0	0	0	0	0	0	0	0	0	0	0	0	0	0
572280	k__Bacteria	p__Planctomycetes	c__Planctomycea	o__Gemmatales	f__Gemmataceae	g__Gemmata	s__unclassified	number.1 gg_id:00000 some annotation	0	0	0	0	0	0	0	0	0	0	0	0	0	0	0	0	0	0	0	0	0	0	0	0	0	0	0	0	0	0	0	0	0	0	0	0	0	0	0	0	0
145149	k__Bacteria	p__Firmicutes	c__Clostridia	o__Clostridiales	f__Veillonellaceae	g__Veillonella	s__unclassified	number.1 gg_id:00000 some annotation	631	584	19	192	36	47	174	23	20	142	55	460	197	4260	3550	613	2689	56	34	3	42	1	809	26	1142	8020	10	1438	114	1	373	3	2764	2	298	856	467	1024	402	2486	96
3909	k__Bacteria	p__Spirochaetes	c__Spirochaetes	o__Spirochaetales	f__Spirochaetaceae	g__Treponema	s__unclassified	number.1 gg_id:00000 some annotation	0	0	0	0	0	0	0	0	0	0	0	8	0	52	0	0	0	0	0	55	179	0	0	0	0	0	0	0	0	0	0	0	0	0	3	1	0	0	0	0	0
287510	k__Bacteria	p__Tenericutes	c__Erysipelotrichi	o__Erysipelotrichales	f__Erysipelotrichaceae	g__Catenibacterium	s__unclassified	number.1 gg_id:00000 some annotation	0	0	0	0	0	0	0	0	0	0	0	0	0	0	0	0	0	0	0	0	0	0	0	0	0	0	0	0	0	0	0	0	0	0	0	0	0	4	0	0	0
108137	k__Bacteria	p__Bacteroidetes	c__Bacteroidia	o__Bacteroidales	f__Prevotellaceae	g__Prevotella	s__Prevotella_multiformis	number.1 gg_id:00000 some annotation	0	0	0	0	0	0	0	0	0	0	0	0	12	0	0	0	0	0	0	58	0	0	0	0	0	0	0	0	12	0	0	0	0	0	62	0	0	0	0	0	0
329940	k__Bacteria	p__Proteobacteria	c__Alphaproteobacteria	o__Caulobacterales	f__Caulobacteraceae	g__Brevundimonas	s__Brevundimonas_diminuta	number.1 gg_id:00000 some annotation	0	0	0	0	0	0	0	1	0	0	0	0	0	0	0	0	0	0	0	0	0	0	0	0	0	0	0	0	0	0	0	0	0	0	0	0	0	0	0	0	0
566053	k__Bacteria	p__Firmicutes	c__Bacilli	o__Bacillales	f__Bacillaceae	g__Bacillus	s__Bacillus_amyloliquefaciens	number.1 gg_id:00000 some annotation	0	0	0	0	0	0	0	0	0	0	0	0	0	0	0	0	0	0	0	0	0	0	0	0	0	0	0	0	1	0	0	0	0	0	0	0	0	0	0	0	0
231151	k__Bacteria	p__Firmicutes	c__Clostridia	o__Clostridiales	f__Lachnospiraceae	g__unclassified	s__unclassified	number.1 gg_id:00000 some annotation	0	0	0	0	0	0	0	0	11	0	0	0	0	0	0	0	0	0	0	0	0	0	0	0	0	0	0	0	0	0	0	0	0	0	0	0	0	0	0	0	0
551260	k__Bacteria	p__Firmicutes	c__Bacilli	o__Bacillales	f__Bacillaceae	g__Oceanobacillus	s__unclassified	number.1 gg_id:00000 some annotation	0	0	0	0	0	0	0	0	0	0	0	0	0	0	0	0	0	0	0	0	0	0	0	0	0	0	0	0	0	0	0	0	0	0	0	0	0	0	0	0	0
181443	k__Bacteria	p__Firmicutes	c__Clostridia	o__Clostridiales	f__Lachnospiraceae	g__unclassified	s__unclassified	number.1 gg_id:00000 some annotation	0	0	0	0	0	0	0	0	0	0	0	0	0	0	0	0	0	0	0	0	0	0	0	0	0	0	0	0	0	0	0	0	0	0	0	0	0	0	0	0	0
200359	k__Bacteria	p__SR1	c__unclassified	o__unclassified	f__unclassified	g__unclassified	s__unclassified	number.1 gg_id:00000 some annotation	0	0	0	0	0	0	1	0	0	0	0	0	0	2	0	0	0	0	170	25	0	0	0	0	0	0	27	0	0	0	1	0	0	0	21	0	0	0	0	0	27
98380	k__Bacteria	p__Proteobacteria	c__Betaproteobacteria	o__Burkholderiales	f__unclassified	g__unclassified	s__unclassified	number.1 gg_id:00000 some annotation	0	0	0	0	0	1	0	1	3	6	6	0	1	1	1	12	7	0	0	0	1	1131	1	0	0	11	0	1	52	0	1	0	0	0	0	0	0	0	0	0	2
292521	k__Bacteria	p__Actinobacteria	c__Actinobacteria	o__Bifidobacteriales	f__Bifidobacteriaceae	g__Bifidobacterium	s__unclassified	number.1 gg_id:00000 some annotation	0	0	0	0	0	0	0	0	0	0	0	0	0	0	0	0	0	0	0	0	0	0	0	0	0	0	0	0	0	0	0	0	0	0	0	1	0	0	0	0	0
96673	k__Bacteria	p__Bacteroidetes	c__Bacteroidia	o__Bacteroidales	f__RikenellaceaeII	g__unclassified	s__unclassified	number.1 gg_id:00000 some annotation	0	0	0	0	0	0	0	0	25	0	0	0	0	0	0	0	0	0	0	0	0	0	0	0	0	0	0	0	0	0	0	0	0	4	0	0	0	0	0	0	0
74465	k__Bacteria	p__Proteobacteria	c__Gammaproteobacteria	o__Pasteurellales	f__Pasteurellaceae	g__unclassified	s__unclassified	number.1 gg_id:00000 some annotation	0	0	0	0	0	0	0	0	0	0	0	0	2	0	0	0	0	0	0	0	0	0	0	0	0	0	1	0	0	0	0	12	0	0	0	0	0	0	0	0	3
259097	k__Bacteria	p__Synergistetes	c__Synergistia	o__Synergistales	f__Dethiosulfovibrionaceae	g__Pyramidobacter	s__Pyramidobacter_piscolens	number.1 gg_id:00000 some annotation	0	0	0	0	0	0	0	0	0	0	0	0	0	0	0	0	0	0	0	0	3	0	0	0	0	0	0	0	27	0	0	0	0	0	0	0	0	0	0	0	0
173632	k__Bacteria	p__Proteobacteria	c__Gammaproteobacteria	o__Alteromonadales	f__Chromatiaceae	g__Rheinheimera	s__unclassified	number.1 gg_id:00000 some annotation	0	0	0	0	0	0	0	0	0	0	0	0	0	0	0	0	0	0	0	0	0	0	0	0	0	0	0	0	0	0	0	0	0	0	0	0	0	0	0	0	0
499851	k__Bacteria	p__Proteobacteria	c__Gammaproteobacteria	o__Legionellales	f__Legionellaceae	g__Legionella	s__unclassified	number.1 gg_id:00000 some annotation	0	0	0	0	0	0	0	0	0	0	0	0	0	0	0	0	0	0	0	0	0	0	0	0	0	0	0	0	0	0	0	0	0	0	0	0	0	0	0	0	0
155443	k__Bacteria	p__Proteobacteria	c__Gammaproteobacteria	o__Pasteurellales	f__Pasteurellaceae	g__Haemophilus	s__unclassified	number.1 gg_id:00000 some annotation	0	0	0	0	1	0	0	0	0	0	0	0	0	0	0	0	0	0	0	0	0	0	0	0	0	0	0	0	0	0	0	0	0	0	0	0	0	0	0	0	0
127649	k__Bacteria	p__Verrucomicrobia	c__Spartobacteria	o__Spartobacteriales	f__Spartobacteriaceae	g__Candidatus_Xiphinematobacter	s__unclassified	number.1 gg_id:00000 some annotation	0	0	0	0	0	0	0	0	0	0	0	0	0	0	0	0	0	0	0	0	0	71	0	0	0	0	0	0	0	0	0	0	0	0	0	0	0	0	0	0	0
196974	k__Bacteria	p__Firmicutes	c__Clostridia	o__Clostridiales	f__Lachnospiraceae	g__unclassified	s__unclassified	number.1 gg_id:00000 some annotation	0	0	0	0	0	0	0	0	13	0	0	0	0	0	0	0	0	0	0	0	0	0	0	0	0	0	0	0	0	0	0	0	0	0	0	0	0	0	0	0	0
13405	k__Bacteria	p__Actinobacteria	c__Actinobacteria	o__Actinomycetales	f__Corynebacteriaceae	g__Corynebacterium	s__unclassified	number.1 gg_id:00000 some annotation	0	0	0	0	0	0	0	0	0	0	0	0	0	0	0	0	0	0	0	0	0	0	0	0	0	0	0	0	0	0	0	0	0	0	0	0	0	0	0	0	0
42684	k__Bacteria	p__Proteobacteria	c__Betaproteobacteria	o__Neisseriales	f__Neisseriaceae	g__Neisseria	s__unclassified	number.1 gg_id:00000 some annotation	0	0	0	0	0	0	0	0	0	0	0	9	0	9	0	0	0	0	0	0	125	0	0	0	0	0	0	0	0	0	0	0	0	0	1	5	3	1	0	0	0
335826	k__Bacteria	p__Firmicutes	c__Clostridia	o__Clostridiales	f__Veillonellaceae	g__Acidaminococcus	s__Acidaminococcus_fermentans	number.1 gg_id:00000 some annotation	0	0	0	0	0	0	0	0	40	0	0	0	0	0	0	0	0	0	0	0	0	0	0	0	0	0	0	0	0	0	0	0	0	0	0	0	0	0	0	0	0
130103	k__Bacteria	p__Firmicutes	c__Clostridia	o__Clostridiales	f__Lachnospiraceae	g__Clostridium	s__unclassified	number.1 gg_id:00000 some annotation	0	0	0	0	0	0	0	0	0	0	0	0	0	0	0	0	0	0	0	0	0	0	0	0	0	0	0	0	0	0	0	0	0	0	0	0	1	0	0	0	0
209122	k__Bacteria	p__Firmicutes	c__Clostridia	o__Clostridiales	f__Ruminococcaceae	g__unclassified	s__unclassified	number.1 gg_id:00000 some annotation	0	0	0	0	0	0	0	0	0	0	0	0	0	0	0	0	0	0	0	0	0	0	0	0	0	0	0	0	0	0	0	0	0	0	0	0	0	0	0	0	0
301091	k__Bacteria	p__Spirochaetes	c__Spirochaetes	o__Spirochaetales	f__Spirochaetaceae	g__Treponema	s__Treponema_medium	number.1 gg_id:00000 some annotation	0	0	0	0	0	1	0	0	0	0	0	0	0	0	0	0	0	0	0	2	0	0	0	0	0	0	0	0	0	0	0	0	0	0	2	0	0	0	0	0	0
512914	k__Bacteria	p__Proteobacteria	c__Gammaproteobacteria	o__Enterobacteriales	f__Enterobacteriaceae	g__unclassified	s__unclassified	number.1 gg_id:00000 some annotation	0	0	0	0	0	0	0	0	0	0	0	0	0	0	0	0	0	0	0	0	0	8	0	0	0	0	0	0	0	10	0	0	0	7	0	0	0	0	0	0	0
166308	k__Bacteria	p__Bacteroidetes	c__Bacteroidia	o__Bacteroidales	f__Prevotellaceae	g__Prevotella	s__unclassified	number.1 gg_id:00000 some annotation	0	0	0	0	0	0	0	0	470	0	0	0	0	0	0	0	0	0	0	0	1	0	0	0	0	0	0	0	0	125	0	0	0	144	1	1	0	0	0	0	0
107452	k__Bacteria	p__Bacteroidetes	c__Flavobacteria	o__Flavobacteriales	f__Flavobacteriaceae	g__Sejongia	s__unclassified	number.1 gg_id:00000 some annotation	0	0	0	0	0	0	0	0	4	0	0	0	0	0	0	0	0	0	0	0	0	0	0	0	0	0	0	0	0	0	0	0	0	0	0	0	0	0	0	0	0
149091	k__Bacteria	p__Firmicutes	c__Clostridia	o__Clostridiales	f__Veillonellaceae	g__unclassified	s__unclassified	number.1 gg_id:00000 some annotation	0	0	0	0	0	0	0	0	0	0	0	0	0	1	0	2	0	0	0	0	0	0	0	0	0	0	0	0	0	0	0	0	0	0	0	0	0	0	0	0	0
423742	k__Bacteria	p__Bacteroidetes	c__Bacteroidia	o__Bacteroidales	f__Porphyromonadaceae	g__Porphyromonas	s__unclassified	number.1 gg_id:00000 some annotation	53	49	230	453	44	46	162	147	102	801	323	1	353	38	10	219	0	2113	43	0	0	48	25	7	42	1	347	332	119	2	1239	627	2	0	8	0	201	108	0	71	471
259422	k__Bacteria	p__Firmicutes	c__Bacilli	o__Lactobacillales	f__Lactobacillaceae	g__Lactobacillus	s__Lactobacillus_fermentum	number.1 gg_id:00000 some annotation	0	0	0	0	0	0	0	0	0	0	0	19	0	1	0	0	0	0	0	0	0	0	0	0	0	49	0	0	0	0	0	0	0	0	0	0	0	0	0	0	0
362863	k__Bacteria	p__Firmicutes	c__Clostridia	o__Clostridiales	f__Lachnospiraceae	g__Coprococcus	s__unclassified	number.1 gg_id:00000 some annotation	0	0	0	0	0	0	0	0	0	0	0	0	0	0	0	0	0	0	0	0	0	0	0	0	0	0	0	0	0	0	0	1	0	0	0	0	0	0	0	0	0
185845	k__Bacteria	p__Firmicutes	c__Clostridia	o__Clostridiales	f__Lachnospiraceae	g__Blautia	s__unclassified	number.1 gg_id:00000 some annotation	0	0	0	0	0	0	0	0	0	0	0	0	0	0	0	0	0	0	0	0	0	0	0	0	0	0	0	0	0	0	0	0	0	0	0	0	1	0	1	0	0
358442	k__Bacteria	p__Firmicutes	c__Clostridia	o__Clostridiales	f__Lachnospiraceae	g__Blautia	s__unclassified	number.1 gg_id:00000 some annotation	0	0	0	0	0	0	0	0	0	0	0	0	0	0	0	0	0	0	0	0	0	0	0	0	0	0	0	0	0	1	0	0	0	1	0	0	0	0	0	0	0
470967	k__Bacteria	p__Firmicutes	c__Clostridia	o__Clostridiales	f__Lachnospiraceae	g__unclassified	s__unclassified	number.1 gg_id:00000 some annotation	0	0	0	0	0	0	0	0	0	0	0	0	0	0	0	0	0	1	0	0	0	0	0	0	0	0	0	0	0	0	0	0	0	5	0	0	0	0	0	0	0
38515	k__Bacteria	p__Proteobacteria	c__Gammaproteobacteria	o__Pasteurellales	f__Pasteurellaceae	g__Mannheimia	s__unclassified	number.1 gg_id:00000 some annotation	0	0	0	0	0	0	0	0	0	0	0	0	0	0	0	0	0	0	0	0	0	0	0	0	0	0	0	0	0	0	0	0	3	0	0	0	0	0	0	0	0
529296	k__Bacteria	p__Proteobacteria	c__Gammaproteobacteria	o__Legionellales	f__Coxiellaceae	g__Aquicella	s__unclassified	number.1 gg_id:00000 some annotation	0	0	0	0	0	0	1	0	0	0	0	0	0	0	0	0	0	0	0	0	0	0	0	0	0	0	0	0	0	0	0	0	0	0	0	0	0	0	0	0	0
329761	k__Bacteria	p__Firmicutes	c__Clostridia	o__Clostridiales	f__Catabacteriaceae	g__unclassified	s__unclassified	number.1 gg_id:00000 some annotation	0	0	0	0	0	0	0	0	0	0	0	0	0	0	0	0	0	0	0	0	0	0	0	0	0	0	0	0	0	53	0	0	0	0	0	0	0	0	0	0	0
459896	k__Bacteria	p__Bacteroidetes	c__Bacteroidia	o__Bacteroidales	f__Prevotellaceae	g__unclassified	s__unclassified	number.1 gg_id:00000 some annotation	0	0	0	0	0	0	0	0	0	1	12	0	4	1	0	2	0	0	0	7	30	0	0	0	0	3	0	0	49	0	0	0	0	0	1	1	0	0	0	0	0
274244	k__Bacteria	p__Bacteroidetes	c__Bacteroidia	o__Bacteroidales	f__unclassified	g__unclassified	s__unclassified	number.1 gg_id:00000 some annotation	0	1	0	0	0	1	0	0	0	0	0	0	0	0	0	0	0	0	0	0	0	0	1	0	0	0	0	0	0	155	0	0	0	0	0	0	0	0	0	0	1
85734	k__Bacteria	p__Proteobacteria	c__Alphaproteobacteria	o__Rhizobiales	f__Methylobacteriaceae	g__Methylobacterium	s__unclassified	number.1 gg_id:00000 some annotation	0	0	0	0	0	0	0	0	0	0	0	0	0	0	0	0	0	0	0	0	0	1	0	0	0	0	0	0	0	0	0	0	0	0	0	0	0	0	0	0	0
216616	k__Bacteria	p__Actinobacteria	c__Actinobacteria	o__Actinomycetales	f__Nocardioidaceae	g__unclassified	s__unclassified	number.1 gg_id:00000 some annotation	0	0	0	0	0	0	0	0	0	0	0	0	0	0	0	0	0	0	0	0	0	8	0	0	0	0	0	0	0	0	0	0	0	0	0	0	0	0	0	0	0
269382	k__Bacteria	p__Firmicutes	c__Clostridia	o__Clostridiales	f__Lachnospiraceae	g__unclassified	s__unclassified	number.1 gg_id:00000 some annotation	0	0	0	0	0	0	0	2	91	0	0	0	0	0	0	0	0	0	0	0	1	0	0	0	0	0	0	0	0	0	0	0	0	0	0	0	0	0	0	0	0
83959	k__Bacteria	p__Cyanobacteria	c__Chloroplast	o__Stramenopiles	f__unclassified	g__unclassified	s__unclassified	number.1 gg_id:00000 some annotation	0	0	0	0	0	1	0	0	0	0	0	0	0	0	0	0	0	0	0	0	0	0	0	0	0	0	0	0	0	0	0	0	0	0	0	0	0	0	0	0	0
9715	k__Bacteria	p__Proteobacteria	c__Gammaproteobacteria	o__Enterobacteriales	f__Enterobacteriaceae	g__unclassified	s__unclassified	number.1 gg_id:00000 some annotation	0	0	0	0	0	0	0	0	0	0	0	0	0	0	0	0	0	0	0	0	0	0	0	0	0	0	0	0	0	0	0	0	0	0	0	0	0	0	0	0	0
168716	k__Bacteria	p__Firmicutes	c__Clostridia	o__Clostridiales	f__Ruminococcaceae	g__unclassified	s__unclassified	number.1 gg_id:00000 some annotation	0	0	0	0	0	0	0	0	0	0	0	0	0	0	0	0	0	0	0	4	0	0	0	0	0	0	0	0	0	0	0	0	0	0	1	0	0	0	0	0	0
269203	k__Bacteria	p__Proteobacteria	c__Alphaproteobacteria	o__Sphingomonadales	f__Sphingomonadaceae	g__Sphingomonas	s__unclassified	number.1 gg_id:00000 some annotation	0	0	0	0	0	0	0	0	0	0	0	1	0	0	0	0	0	0	0	0	0	0	0	0	0	0	0	0	0	0	0	0	0	0	0	0	0	0	0	0	0
203590	k__Bacteria	p__Firmicutes	c__Clostridia	o__Clostridiales	f__Lachnospiraceae	g__unclassified	s__unclassified	number.1 gg_id:00000 some annotation	0	0	0	0	0	0	0	0	0	0	0	0	0	0	0	0	0	0	0	0	0	0	0	0	0	0	0	0	0	1	0	0	0	0	0	0	0	0	0	0	0
168242	k__Bacteria	p__Firmicutes	c__Bacilli	o__Lactobacillales	f__Leuconostocaceae	g__Leuconostoc	s__unclassified	number.1 gg_id:00000 some annotation	0	0	0	0	0	0	0	0	0	0	0	0	0	0	0	0	1	0	0	0	0	0	0	0	0	0	0	0	0	0	0	0	0	0	0	0	0	0	0	0	0
315575	k__Bacteria	p__Bacteroidetes	c__Bacteroidia	o__Bacteroidales	f__Bacteroidaceae	g__Bacteroides	s__unclassified	number.1 gg_id:00000 some annotation	0	0	0	0	0	0	0	0	0	0	0	0	0	0	0	0	0	0	0	0	0	0	0	0	0	0	0	0	0	76	0	0	0	0	0	0	0	0	0	0	0
360229	k__Bacteria	p__Proteobacteria	c__Betaproteobacteria	o__Neisseriales	f__Neisseriaceae	g__unclassified	s__unclassified	number.1 gg_id:00000 some annotation	0	4	0	0	0	0	0	0	0	0	1	0	0	0	0	0	0	0	0	0	3	0	0	0	8	0	1	0	1	0	0	0	0	3	0	0	4	0	0	2	0
220269	k__Bacteria	p__Proteobacteria	c__Alphaproteobacteria	o__Rhizobiales	f__Rhizobiaceae	g__unclassified	s__unclassified	number.1 gg_id:00000 some annotation	0	0	0	0	0	0	0	0	0	0	0	0	0	0	0	0	0	0	0	0	0	0	0	0	0	0	0	0	0	0	0	0	0	0	0	0	0	0	0	0	0
190694	k__Bacteria	p__Proteobacteria	c__Deltaproteobacteria	o__Bdellovibrionales	f__Bacteriovoracaceae	g__unclassified	s__unclassified	number.1 gg_id:00000 some annotation	0	0	0	0	1	0	0	0	0	0	0	0	0	0	0	0	0	0	0	0	0	0	0	0	0	0	0	0	0	0	0	0	0	0	0	0	0	0	0	0	0
528380	k__Bacteria	p__Firmicutes	c__Clostridia	o__Clostridiales	f__Lachnospiraceae	g__Moryella	s__unclassified	number.1 gg_id:00000 some annotation	0	1	0	0	0	0	0	0	0	0	0	7	0	4	0	4	20	0	0	0	0	0	0	2	0	0	0	0	0	0	0	0	0	0	8	1	0	101	0	0	3
133467	k__Bacteria	p__Actinobacteria	c__Actinobacteria	o__Actinomycetales	f__Intrasporangiaceae	g__unclassified	s__unclassified	number.1 gg_id:00000 some annotation	0	0	0	0	0	0	0	0	0	0	0	0	0	0	0	0	0	0	0	0	0	0	0	0	0	0	0	0	0	0	0	0	0	0	0	0	0	0	0	0	0
295422	k__Bacteria	p__Proteobacteria	c__Betaproteobacteria	o__Burkholderiales	f__Alcaligenaceae	g__Sutterella	s__unclassified	number.1 gg_id:00000 some annotation	0	0	0	0	0	0	0	0	0	0	0	0	0	0	0	0	0	0	0	0	0	11	0	0	0	0	0	0	0	2	0	0	0	1	0	0	0	0	0	0	0
86468	k__Bacteria	p__Bacteroidetes	c__Bacteroidia	o__Bacteroidales	f__Bacteroidaceae	g__Bacteroides	s__unclassified	number.1 gg_id:00000 some annotation	0	0	0	0	0	0	0	0	1	0	0	0	0	0	0	0	0	0	0	0	0	0	0	0	0	0	0	0	0	8	0	0	0	0	0	0	0	0	0	0	0
137145	k__Bacteria	p__Bacteroidetes	c__Sphingobacteria	o__Sphingobacteriales	f__Flexibacteraceae	g__Arcicella	s__unclassified	number.1 gg_id:00000 some annotation	0	0	0	0	5	1	2	0	1	0	0	0	0	0	0	0	0	0	0	0	0	0	0	0	0	0	0	0	0	0	0	0	0	0	0	0	0	0	0	0	0
317047	k__Bacteria	p__Proteobacteria	c__Gammaproteobacteria	o__Chromatiales	f__Ectothiorhodospiraceae	g__unclassified	s__unclassified	number.1 gg_id:00000 some annotation	0	0	0	0	0	0	0	0	0	0	0	0	0	0	0	0	0	0	0	0	0	0	0	0	0	0	0	0	0	0	0	0	0	0	0	0	0	0	0	0	0
196757	k__Bacteria	p__Bacteroidetes	c__Bacteroidia	o__Bacteroidales	f__Bacteroidaceae	g__Bacteroides	s__unclassified	number.1 gg_id:00000 some annotation	0	0	0	0	0	0	0	0	6	0	1	0	0	0	0	0	0	0	0	0	0	15	0	0	0	0	0	0	1	115	0	0	0	2	0	0	0	0	0	0	0
526804	k__Bacteria	p__Firmicutes	c__Bacilli	o__Lactobacillales	f__Streptococcaceae	g__Streptococcus	s__unclassified	number.1 gg_id:00000 some annotation	37	1	0	103	0	0	2	25	3	1	0	94	5	187	263	20	47	1	0	0	1	1	5	0	21	176	0	1	22	0	10	0	11	0	3	50	7	1	6	68	2
70787	k__Bacteria	p__Firmicutes	c__Clostridia	o__Clostridiales	f__Clostridiales_Family_XI._Incertae_Sedis	g__unclassified	s__unclassified	number.1 gg_id:00000 some annotation	0	0	0	0	0	0	0	0	0	0	0	0	3	0	0	0	0	0	0	1	0	0	0	0	0	0	0	0	0	0	0	0	0	0	1	0	0	0	0	0	0
233169	k__Bacteria	p__Firmicutes	c__Clostridia	o__Clostridiales	f__Lachnospiraceae	g__unclassified	s__unclassified	number.1 gg_id:00000 some annotation	0	0	0	0	0	0	0	0	33	0	4	0	0	0	0	0	0	0	0	0	0	0	0	0	0	0	0	0	0	0	0	0	0	0	0	0	0	0	0	0	0
311659	k__Bacteria	p__SPAM	c__0319-6G9	o__unclassified	f__unclassified	g__unclassified	s__unclassified	number.1 gg_id:00000 some annotation	0	0	0	0	0	0	0	0	0	0	0	0	0	0	0	0	0	0	0	0	0	0	0	0	0	0	0	0	0	0	0	0	0	0	0	0	0	0	0	0	0
176544	k__Bacteria	p__Firmicutes	c__Clostridia	o__Clostridiales	f__Lachnospiraceae	g__Clostridium	s__unclassified	number.1 gg_id:00000 some annotation	0	0	0	0	0	0	0	0	1	0	0	0	0	0	0	0	0	0	0	0	0	0	0	0	0	0	0	0	0	0	0	0	0	0	0	0	0	0	0	0	0
331013	k__Bacteria	p__Firmicutes	c__Clostridia	o__Clostridiales	f__Ruminococcaceae	g__unclassified	s__unclassified	number.1 gg_id:00000 some annotation	0	0	0	0	0	0	0	0	0	0	0	0	0	0	0	0	0	0	0	0	0	0	0	0	0	0	0	0	0	0	0	0	0	0	0	0	0	0	0	0	0
263010	k__Bacteria	p__Bacteroidetes	c__Flavobacteria	o__Flavobacteriales	f__Flavobacteriaceae	g__unclassified	s__unclassified	number.1 gg_id:00000 some annotation	0	0	0	0	1	0	0	0	0	0	0	0	0	0	0	0	0	0	0	0	0	40	0	0	0	0	0	0	0	0	0	0	0	0	0	0	0	0	0	0	0
569158	k__Bacteria	p__Bacteroidetes	c__Bacteroidia	o__Bacteroidales	f__Rikenellaceae	g__unclassified	s__unclassified	number.1 gg_id:00000 some annotation	0	0	0	0	0	0	0	0	0	0	0	0	0	0	0	0	0	0	0	0	0	0	0	0	0	0	0	0	0	0	0	0	0	0	0	0	0	0	0	0	0
513449	k__Bacteria	p__Proteobacteria	c__Betaproteobacteria	o__Burkholderiales	f__Comamonadaceae	g__unclassified	s__unclassified	number.1 gg_id:00000 some annotation	0	0	0	0	0	0	0	0	0	0	0	0	0	0	0	0	0	0	0	0	0	2	0	0	0	1	0	0	0	0	0	0	0	0	0	0	0	0	0	0	0
72999	k__Bacteria	p__Proteobacteria	c__Betaproteobacteria	o__Neisseriales	f__Neisseriaceae	g__unclassified	s__unclassified	number.1 gg_id:00000 some annotation	0	128	0	0	0	0	0	0	0	0	0	0	0	0	0	0	0	0	0	0	0	0	0	0	0	0	0	0	0	0	0	0	0	0	0	0	0	0	0	0	0
129773	k__Bacteria	p__Firmicutes	c__Bacilli	o__Lactobacillales	f__unclassified	g__unclassified	s__unclassified	number.1 gg_id:00000 some annotation	0	0	0	0	0	0	0	0	0	0	0	0	0	0	0	1	0	0	0	0	0	0	0	0	0	0	0	0	0	0	0	0	0	0	0	0	0	0	0	0	1
291090	k__Bacteria	p__Bacteroidetes	c__Bacteroidia	o__Bacteroidales	f__Porphyromonadaceae	g__Parabacteroides	s__Parabacteroides_distasonis	number.1 gg_id:00000 some annotation	0	1	0	0	0	0	0	0	0	2	0	0	0	0	0	0	0	0	0	0	0	0	0	0	0	0	0	0	0	0	0	0	0	0	0	0	0	0	0	0	0
143097	k__Bacteria	p__Proteobacteria	c__Alphaproteobacteria	o__Sphingomonadales	f__Sphingomonadaceae	g__unclassified	s__unclassified	number.1 gg_id:00000 some annotation	0	0	0	0	0	0	0	0	0	0	0	0	0	0	0	0	0	0	0	0	0	0	0	0	0	0	0	0	1	0	0	0	0	0	0	0	0	0	0	0	0
7151	k__Bacteria	p__Proteobacteria	c__Betaproteobacteria	o__Burkholderiales	f__Aquabacteriaceae	g__Aquabacterium	s__unclassified	number.1 gg_id:00000 some annotation	0	0	0	0	0	0	0	0	0	0	0	0	0	0	0	0	0	0	0	0	0	0	0	0	0	0	0	0	0	0	0	0	0	0	0	0	0	0	0	0	0
58374	k__Bacteria	p__Bacteroidetes	c__Sphingobacteria	o__Sphingobacteriales	f__Chitinophagaceae	g__unclassified	s__unclassified	number.1 gg_id:00000 some annotation	0	0	0	0	0	0	0	0	0	0	0	0	0	0	0	0	0	0	0	0	0	0	0	0	0	0	0	0	0	0	0	0	0	0	0	0	0	0	0	0	0
237339	k__Bacteria	p__Actinobacteria	c__Actinobacteria	o__Actinomycetales	f__Nocardioidaceae	g__unclassified	s__unclassified	number.1 gg_id:00000 some annotation	0	0	0	0	0	0	0	0	0	0	0	0	0	0	0	0	0	0	0	0	0	140	0	0	0	0	0	0	0	0	0	0	0	0	0	0	0	0	0	0	0
202648	k__Bacteria	p__Cyanobacteria	c__Chloroplast	o__Streptophyta	f__unclassified	g__unclassified	s__unclassified	number.1 gg_id:00000 some annotation	0	0	0	0	0	0	0	0	0	0	0	0	0	0	0	0	0	0	0	0	0	0	0	0	0	0	0	0	0	0	0	0	0	0	0	0	0	0	0	0	0
115051	k__Bacteria	p__Bacteroidetes	c__Bacteroidia	o__Bacteroidales	f__Prevotellaceae	g__Prevotella	s__unclassified	number.1 gg_id:00000 some annotation	0	0	0	0	0	0	0	0	0	0	0	2	0	0	0	0	0	0	0	0	0	0	0	0	0	0	0	0	0	0	0	0	0	0	0	0	0	0	0	0	0
114895	k__Bacteria	p__Proteobacteria	c__Alphaproteobacteria	o__Rhodobacterales	f__Rhodobacteraceae	g__unclassified	s__unclassified	number.1 gg_id:00000 some annotation	0	0	0	0	0	0	0	0	0	0	0	0	0	0	0	0	0	0	0	0	0	0	0	0	0	0	0	0	0	0	0	0	0	0	0	0	0	0	0	0	0
283608	k__Bacteria	p__Bacteroidetes	c__Sphingobacteria	o__Sphingobacteriales	f__Sphingobacteriaceae	g__Pedobacter	s__unclassified	number.1 gg_id:00000 some annotation	0	0	0	0	0	0	0	0	0	0	0	0	0	0	0	0	0	0	0	0	0	0	0	0	0	0	0	0	0	0	0	0	0	0	0	0	0	0	1	0	0
242005	k__Bacteria	p__Proteobacteria	c__Gammaproteobacteria	o__Enterobacteriales	f__Enterobacteriaceae	g__unclassified	s__unclassified	number.1 gg_id:00000 some annotation	0	0	0	0	0	0	0	0	0	0	0	0	0	0	0	0	0	0	0	0	0	0	0	0	0	0	0	0	2	0	0	0	0	0	0	0	0	0	0	0	0
143722	k__Bacteria	p__Proteobacteria	c__Betaproteobacteria	o__Burkholderiales	f__unclassified	g__unclassified	s__unclassified	number.1 gg_id:00000 some annotation	0	0	0	0	0	0	0	0	0	0	0	0	0	0	0	0	0	0	0	0	0	1	0	0	0	0	0	0	1	0	0	0	0	0	0	0	0	0	0	0	0
92490	k__Bacteria	p__Proteobacteria	c__Alphaproteobacteria	o__Sphingomonadales	f__Sphingomonadaceae	g__unclassified	s__unclassified	number.1 gg_id:00000 some annotation	0	0	0	0	0	0	0	0	0	0	0	0	0	0	0	0	0	0	0	0	0	0	0	0	0	0	0	0	0	0	0	0	0	0	0	0	0	0	0	0	3
8265	k__Bacteria	p__Proteobacteria	c__Gammaproteobacteria	o__Pseudomonadales	f__Moraxellaceae	g__Moraxella	s__unclassified	number.1 gg_id:00000 some annotation	0	0	0	0	0	0	0	0	0	0	0	1	0	0	0	0	0	0	0	0	0	0	0	0	0	0	0	0	0	0	0	0	0	0	0	0	0	0	0	0	1
50448	k__Bacteria	p__Firmicutes	c__Bacilli	o__Lactobacillales	f__Streptococcaceae	g__Streptococcus	s__unclassified	number.1 gg_id:00000 some annotation	0	0	4	0	0	2	42	0	0	11	8	235	99	4	2	1	0	0	0	1	0	0	3	0	0	41	0	0	0	0	1	0	2	0	10	1	0	0	11	0	31
356051	k__Bacteria	p__Bacteroidetes	c__Bacteroidia	o__Bacteroidales	f__Bacteroidaceae	g__Bacteroides	s__unclassified	number.1 gg_id:00000 some annotation	0	0	0	0	0	0	0	0	0	0	0	0	0	0	0	0	0	0	0	0	0	0	0	0	0	0	0	0	0	2	0	0	0	0	0	0	0	0	0	0	0
550814	k__Bacteria	p__Bacteroidetes	c__Bacteroidia	o__Bacteroidales	f__Bacteroidaceae	g__Bacteroides	s__unclassified	number.1 gg_id:00000 some annotation	0	0	0	0	0	0	0	0	0	0	0	0	1	0	0	0	0	0	0	0	0	0	0	0	0	0	0	0	0	0	0	0	0	0	0	0	0	0	0	0	0
306275	k__Bacteria	p__Bacteroidetes	c__Bacteroidia	o__Bacteroidales	f__RikenellaceaeII	g__unclassified	s__unclassified	number.1 gg_id:00000 some annotation	0	0	0	0	0	0	0	0	146	0	0	0	0	0	0	0	0	0	0	0	0	0	0	0	0	0	0	0	0	0	0	0	0	166	0	0	0	0	0	0	0
156790	k__Bacteria	p__Proteobacteria	c__Betaproteobacteria	o__Burkholderiales	f__Comamonadaceae	g__Variovorax	s__Variovorax_paradoxus	number.1 gg_id:00000 some annotation	0	0	1	0	0	0	0	0	0	0	0	0	0	0	0	0	0	0	0	0	0	0	0	0	0	0	0	0	0	0	0	0	0	0	0	0	0	0	0	0	0
471141	k__Bacteria	p__Actinobacteria	c__Actinobacteria	o__Actinomycetales	f__Micrococcaceae	g__Rothia	s__unclassified	number.1 gg_id:00000 some annotation	1849	28	198	4505	746	324	1995	7830	3883	184	90	4935	171	3239	10735	644	8881	996	2	8	3	161	60	4	292	375	1	14	19	3	889	3	33	11	130	42	4	531	319	2859	121
83175	k__Bacteria	p__Firmicutes	c__Clostridia	o__Clostridiales	f__Clostridiales_Family_XI._Incertae_Sedis	g__Peptoniphilus	s__Peptoniphilus_asaccharolyticus	number.1 gg_id:00000 some annotation	0	0	0	0	0	0	0	0	0	0	0	0	0	0	0	0	0	0	0	0	1	0	0	0	0	0	0	0	8	0	0	0	0	0	0	0	0	0	0	0	0
174012	k__Bacteria	p__Firmicutes	c__Clostridia	o__Clostridiales	f__unclassified	g__unclassified	s__unclassified	number.1 gg_id:00000 some annotation	0	0	0	0	0	0	0	0	0	0	0	0	0	0	0	0	0	0	0	0	0	0	0	0	0	0	0	0	0	0	0	0	0	0	0	0	0	0	0	0	0
590169	k__Bacteria	p__Firmicutes	c__Clostridia	o__Clostridiales	f__Lachnospiraceae	g__unclassified	s__unclassified	number.1 gg_id:00000 some annotation	5	1	0	0	14	0	0	0	0	0	0	33	6	33	6	39	47	28	0	2	0	0	714	56	86	2	10	8	0	0	3	0	95	0	12	20	303	187	0	9	11
3861	k__Bacteria	p__Spirochaetes	c__Spirochaetes	o__Spirochaetales	f__Spirochaetaceae	g__Treponema	s__Treponema_lecithinolyticum	number.1 gg_id:00000 some annotation	0	0	0	0	0	0	0	0	1	0	0	0	0	0	0	8	0	0	0	14	259	124	18	0	0	0	0	0	0	0	0	0	5	0	2	11	0	0	0	1	0
89113	k__Bacteria	p__Proteobacteria	c__Betaproteobacteria	o__Burkholderiales	f__Aquabacteriaceae	g__Aquabacterium	s__unclassified	number.1 gg_id:00000 some annotation	0	0	0	0	0	0	0	0	0	0	0	0	0	0	0	0	0	0	0	0	0	4	0	0	0	0	0	0	0	0	0	0	0	0	0	0	0	0	0	0	0
350239	k__Bacteria	p__Bacteroidetes	c__Bacteroidia	o__Bacteroidales	f__RikenellaceaeII	g__unclassified	s__unclassified	number.1 gg_id:00000 some annotation	0	0	0	0	0	0	0	0	4	0	0	0	0	0	0	0	0	0	0	0	0	0	0	0	0	0	0	0	0	0	0	0	0	30	0	0	0	0	0	0	0
217096	k__Bacteria	p__Bacteroidetes	c__Bacteroidia	o__Bacteroidales	f__RikenellaceaeII	g__unclassified	s__unclassified	number.1 gg_id:00000 some annotation	0	1	0	0	0	0	0	0	258	0	2	0	0	1	1	0	0	0	0	0	0	0	0	0	0	0	0	0	0	370	0	0	0	51	0	0	0	0	0	0	0
245595	k__Bacteria	p__Bacteroidetes	c__Bacteroidia	o__Bacteroidales	f__RikenellaceaeII	g__unclassified	s__unclassified	number.1 gg_id:00000 some annotation	0	0	0	0	0	0	0	1	74	0	0	0	0	0	1	0	0	0	0	0	0	0	0	0	0	0	0	0	0	0	0	0	0	0	0	0	0	0	0	0	0
354433	k__Bacteria	p__Actinobacteria	c__Actinobacteria	o__Actinomycetales	f__Micrococcaceae	g__Arthrobacter	s__unclassified	number.1 gg_id:00000 some annotation	0	0	0	0	0	0	0	0	2	0	0	0	0	0	0	0	0	0	0	0	0	0	0	0	0	0	0	0	1	0	0	0	0	0	0	0	0	0	0	0	0
15302	k__Bacteria	p__Firmicutes	c__Bacilli	o__Lactobacillales	f__Enterococcaceae	g__unclassified	s__unclassified	number.1 gg_id:00000 some annotation	0	0	0	0	0	0	0	0	0	0	0	0	0	0	0	0	0	0	0	0	0	0	0	0	0	0	0	0	0	0	0	0	0	0	0	0	0	0	0	0	0
92167	k__Bacteria	p__Proteobacteria	c__Betaproteobacteria	o__Neisseriales	f__Neisseriaceae	g__Simonsiella	s__unclassified	number.1 gg_id:00000 some annotation	0	0	0	0	0	0	1	3	0	0	0	0	0	0	0	41	0	0	0	0	0	0	0	0	0	0	0	0	0	0	2	0	0	0	0	0	0	0	0	0	0
241011	k__Bacteria	p__Bacteroidetes	c__Sphingobacteria	o__Sphingobacteriales	f__Chitinophagaceae	g__unclassified	s__unclassified	number.1 gg_id:00000 some annotation	0	0	0	0	0	0	0	0	0	0	0	0	0	0	0	0	0	0	0	0	0	0	0	0	0	0	0	0	0	0	0	0	0	0	0	0	0	0	0	0	0
3914	k__Bacteria	p__Spirochaetes	c__Spirochaetes	o__Spirochaetales	f__Spirochaetaceae	g__Treponema	s__Treponema_denticola	number.1 gg_id:00000 some annotation	0	0	0	0	0	0	0	0	0	0	0	0	0	0	0	0	0	0	0	3	0	0	0	0	0	0	0	0	0	0	0	0	0	0	2	0	0	0	0	0	0
189047	k__Bacteria	p__Firmicutes	c__Clostridia	o__Clostridiales	f__Ruminococcaceae	g__unclassified	s__unclassified	number.1 gg_id:00000 some annotation	0	0	0	0	0	0	0	0	0	0	0	0	3	0	0	0	0	0	0	0	0	0	0	0	0	0	0	0	1	144	0	0	0	0	0	0	0	0	0	0	0
180216	k__Bacteria	p__Firmicutes	c__Clostridia	o__Clostridiales	f__Lachnospiraceae	g__Clostridium	s__unclassified	number.1 gg_id:00000 some annotation	0	0	0	0	0	0	0	0	0	0	0	0	0	0	0	0	0	0	0	0	0	0	0	0	0	0	0	0	0	0	0	0	0	0	0	0	0	0	0	0	0
400315	k__Bacteria	p__Proteobacteria	c__Gammaproteobacteria	o__Pseudomonadales	f__Pseudomonadaceae	g__Pseudomonas	s__unclassified	number.1 gg_id:00000 some annotation	0	0	0	0	0	0	0	0	0	0	0	0	0	0	0	0	0	0	0	0	0	4	0	0	0	0	0	0	0	0	0	0	0	1	0	0	0	0	0	0	0
560846	k__Bacteria	p__Actinobacteria	c__Actinobacteria	o__MC47	f__unclassified	g__unclassified	s__unclassified	number.1 gg_id:00000 some annotation	0	0	0	0	0	0	0	0	0	0	0	0	0	0	0	0	0	0	0	0	0	0	0	0	0	0	0	0	0	0	0	0	0	0	0	0	0	0	0	0	0
331820	k__Bacteria	p__Bacteroidetes	c__Bacteroidia	o__Bacteroidales	f__Bacteroidaceae	g__Bacteroides	s__unclassified	number.1 gg_id:00000 some annotation	0	0	0	0	0	2	1	1	88	1	0	0	1	0	0	0	0	1	0	0	1	0	2	1	2	2	0	1	0	2518	1	0	0	23	1	1	0	5	0	0	2
28841	k__Bacteria	p__Proteobacteria	c__Gammaproteobacteria	o__Pseudomonadales	f__Pseudomonadaceae	g__unclassified	s__unclassified	number.1 gg_id:00000 some annotation	0	0	0	0	0	0	0	0	0	0	0	0	0	0	0	0	0	0	0	0	0	0	0	0	0	0	0	0	0	0	0	0	0	0	0	0	0	0	1	0	0
6733	k__Bacteria	p__Proteobacteria	c__Betaproteobacteria	o__Rhodocyclales	f__Rhodocyclaceae	g__Zoogloea	s__unclassified	number.1 gg_id:00000 some annotation	0	0	1	0	0	0	3	0	0	0	0	0	0	0	0	0	0	0	0	0	0	0	0	0	0	0	0	0	3	0	0	0	0	0	0	0	0	0	0	0	0
364844	k__Bacteria	p__Bacteroidetes	c__Bacteroidia	o__Bacteroidales	f__unclassified	g__unclassified	s__unclassified	number.1 gg_id:00000 some annotation	0	0	0	0	0	0	0	0	0	6	77	0	0	1	1	0	0	0	0	61	1	0	1	0	0	0	0	0	0	0	0	0	0	0	2	0	1	0	0	0	0
173135	k__Bacteria	p__Firmicutes	c__Clostridia	o__Clostridiales	f__Ruminococcaceae	g__Faecalibacterium	s__unclassified	number.1 gg_id:00000 some annotation	0	0	0	0	0	0	0	0	0	0	0	0	0	0	0	0	0	0	0	0	0	0	0	0	0	0	0	0	0	0	0	0	0	1	0	0	0	0	0	0	0
14288	k__Bacteria	p__Firmicutes	c__Clostridia	o__Clostridiales	f__Clostridiales_Family_XI._Incertae_Sedis	g__Anaerococcus	s__Anaerococcus_hydrogenalis	number.1 gg_id:00000 some annotation	0	0	0	0	0	0	0	0	0	0	0	0	0	0	0	0	0	0	0	0	0	0	0	1525	0	0	0	0	0	0	0	0	0	0	0	0	0	321	0	0	0
366202	k__Bacteria	p__Firmicutes	c__Bacilli	o__Lactobacillales	f__unclassified	g__unclassified	s__unclassified	number.1 gg_id:00000 some annotation	0	0	0	0	0	0	0	0	0	0	0	0	0	0	0	0	0	0	0	0	0	0	0	0	0	0	0	0	0	0	0	0	0	0	0	0	0	0	0	0	0
469873	k__Bacteria	p__Actinobacteria	c__Actinobacteria	o__Bifidobacteriales	f__Bifidobacteriaceae	g__Bifidobacterium	s__unclassified	number.1 gg_id:00000 some annotation	0	0	0	0	0	0	0	0	0	0	0	0	0	0	0	0	0	0	0	0	0	0	0	0	0	0	0	0	0	0	0	0	0	0	0	0	0	0	0	0	0
258260	k__Bacteria	p__Firmicutes	c__Clostridia	o__Clostridiales	f__Ruminococcaceae	g__unclassified	s__unclassified	number.1 gg_id:00000 some annotation	0	0	0	0	0	0	0	0	3	0	0	0	0	0	0	0	0	0	0	0	0	0	0	0	0	0	0	0	0	0	0	0	0	0	0	0	0	0	0	0	0
70038	k__Bacteria	p__Fusobacteria	c__Fusobacteria	o__Fusobacteriales	f__Fusobacteriaceae	g__Leptotrichia	s__unclassified	number.1 gg_id:00000 some annotation	0	0	0	0	0	0	0	0	0	0	0	0	0	0	0	2	0	0	0	0	0	29	5	0	0	0	0	0	0	0	0	0	0	0	0	5	0	0	0	0	0
263876	k__Bacteria	p__Firmicutes	c__Clostridia	o__Clostridiales	f__Lachnospiraceae	g__unclassified	s__unclassified	number.1 gg_id:00000 some annotation	0	0	0	0	0	0	0	0	35	0	0	0	0	0	0	0	0	0	0	0	0	0	0	0	1	0	0	0	0	0	0	0	0	0	0	0	0	0	0	0	0
224390	k__Bacteria	p__unclassified	c__unclassified	o__unclassified	f__unclassified	g__unclassified	s__unclassified	number.1 gg_id:00000 some annotation	0	0	0	0	0	0	0	0	0	0	0	0	0	0	0	0	0	0	0	0	0	11	0	0	0	0	0	0	0	0	0	0	0	0	0	0	0	0	0	0	0
248682	k__Bacteria	p__Proteobacteria	c__Alphaproteobacteria	o__Rhizobiales	f__Hyphomicrobiaceae	g__unclassified	s__unclassified	number.1 gg_id:00000 some annotation	0	0	0	0	0	0	2	0	0	0	0	0	0	0	0	0	0	0	0	0	0	0	0	0	0	0	0	0	0	0	0	0	0	0	0	0	0	0	0	0	0
55854	k__Bacteria	p__Bacteroidetes	c__Bacteroidia	o__Bacteroidales	f__Prevotellaceae	g__Prevotella	s__unclassified	number.1 gg_id:00000 some annotation	0	0	0	0	0	0	0	0	0	0	0	0	6	12	0	0	0	0	2	0	0	0	0	0	0	0	0	0	0	0	0	0	0	0	0	0	0	0	0	0	0
356874	k__Bacteria	p__Proteobacteria	c__Betaproteobacteria	o__Neisseriales	f__Neisseriaceae	g__unclassified	s__unclassified	number.1 gg_id:00000 some annotation	0	0	0	0	0	0	0	0	0	1	0	0	0	0	0	0	0	0	0	0	0	0	0	0	0	0	0	0	0	1	0	0	0	0	0	0	0	0	0	0	0
56320	k__Bacteria	p__Bacteroidetes	c__Bacteroidia	o__Bacteroidales	f__Prevotellaceae	g__Prevotella	s__Prevotella_baroniae	number.1 gg_id:00000 some annotation	0	0	0	0	0	0	0	0	0	0	0	4	53	52	5	1	0	1	737	319	0	0	0	0	0	0	1	0	10	0	0	0	0	0	10	0	0	0	0	0	0
92942	k__Bacteria	p__Bacteroidetes	c__Bacteroidia	o__Bacteroidales	f__Prevotellaceae	g__Prevotella	s__unclassified	number.1 gg_id:00000 some annotation	0	0	0	0	0	0	0	0	0	0	0	0	1	0	1	0	0	0	16	11	0	0	3	0	0	0	3	0	0	0	0	0	0	0	0	0	0	0	0	0	26
244531	k__Bacteria	p__Proteobacteria	c__Alphaproteobacteria	o__Rhizobiales	f__Rhizobiaceae	g__Agrobacterium	s__unclassified	number.1 gg_id:00000 some annotation	0	0	0	0	0	0	0	1	0	0	0	0	0	0	0	0	0	0	0	0	0	0	0	0	0	0	0	0	0	0	0	0	0	0	0	0	0	0	0	0	0
240694	k__Bacteria	p__Firmicutes	c__Bacilli	o__Lactobacillales	f__Aerococcaceae	g__unclassified	s__unclassified	number.1 gg_id:00000 some annotation	0	0	0	0	0	0	0	0	0	0	0	0	0	1	0	0	0	0	0	0	0	0	0	0	0	0	0	0	0	0	0	0	0	0	0	0	0	0	0	0	0
193632	k__Bacteria	p__Firmicutes	c__Clostridia	o__Clostridiales	f__Ruminococcaceae	g__Oscillospira	s__unclassified	number.1 gg_id:00000 some annotation	0	0	0	0	0	0	0	0	0	0	0	0	0	0	0	0	0	0	0	0	0	0	0	0	0	0	0	0	0	0	0	0	0	0	0	0	0	0	0	0	0
135189	k__Bacteria	p__Bacteroidetes	c__Sphingobacteria	o__Sphingobacteriales	f__Flexibacteraceae	g__unclassified	s__unclassified	number.1 gg_id:00000 some annotation	0	0	0	0	0	1	0	0	0	0	0	0	0	0	0	0	0	0	0	0	0	0	0	0	0	0	0	0	0	0	0	0	0	0	0	0	0	0	0	0	0
97627	k__Bacteria	p__Proteobacteria	c__Betaproteobacteria	o__Burkholderiales	f__Comamonadaceae	g__unclassified	s__unclassified	number.1 gg_id:00000 some annotation	0	0	1	0	0	0	0	0	0	0	0	0	0	0	0	0	0	0	0	0	0	0	0	0	0	2	0	0	0	0	0	0	0	0	0	0	0	0	0	0	0
261500	k__Bacteria	p__Firmicutes	c__Clostridia	o__Clostridiales	f__Ruminococcaceae	g__unclassified	s__unclassified	number.1 gg_id:00000 some annotation	0	0	0	0	0	0	0	0	49	0	0	0	0	0	0	0	0	0	0	0	0	0	0	0	0	0	0	0	0	0	0	0	0	0	0	0	0	0	0	0	0
199293	k__Bacteria	p__Firmicutes	c__Clostridia	o__Clostridiales	f__Ruminococcaceae	g__Faecalibacterium	s__unclassified	number.1 gg_id:00000 some annotation	0	0	0	0	0	0	0	0	0	0	0	0	0	0	0	0	0	0	0	0	0	0	0	0	0	0	0	0	0	0	0	0	0	219	0	0	0	0	0	0	0
470812	k__Bacteria	p__Bacteroidetes	c__Bacteroidia	o__Bacteroidales	f__Porphyromonadaceae	g__Porphyromonas	s__unclassified	number.1 gg_id:00000 some annotation	0	0	0	0	0	0	0	0	0	0	0	0	0	0	0	0	0	0	0	7	0	0	0	0	0	0	0	0	0	0	0	0	0	0	3	0	0	0	0	0	0
357470	k__Bacteria	p__Firmicutes	c__Clostridia	o__Clostridiales	f__Ruminococcaceae	g__Faecalibacterium	s__unclassified	number.1 gg_id:00000 some annotation	0	0	0	0	0	0	0	0	0	0	0	0	0	0	0	0	0	0	0	0	0	0	0	0	0	0	0	0	0	0	0	0	0	0	0	0	0	0	0	0	0
248759	k__Bacteria	p__Firmicutes	c__Clostridia	o__Clostridiales	f__Lachnospiraceae	g__unclassified	s__unclassified	number.1 gg_id:00000 some annotation	5	8	6	21	261	0	33	39	0	54	99	0	21	0	0	15	38	59	1	30	0	30	14	111	15	0	63	0	0	0	100	77	8	0	17	1	5	175	0	3	100
182506	k__Bacteria	p__Firmicutes	c__Clostridia	o__Clostridiales	f__Lachnospiraceae	g__Ruminococcus	s__Ruminococcus_gnavus	number.1 gg_id:00000 some annotation	0	0	0	0	0	0	0	0	0	0	0	0	0	0	0	0	0	0	0	0	0	0	0	0	0	0	0	0	0	1	0	0	0	0	0	0	0	0	0	0	0
2394	k__Bacteria	p__Bacteroidetes	c__Flavobacteria	o__Flavobacteriales	f__Flavobacteriaceae	g__Capnocytophaga	s__Capnocytophaga_ochracea	number.1 gg_id:00000 some annotation	1	0	0	0	0	0	7	0	0	0	0	10	0	2	1	9	0	0	0	0	0	0	271	0	1	0	0	0	1	0	0	0	0	0	1	0	111	0	0	0	0
165512	k__Bacteria	p__Firmicutes	c__Clostridia	o__Clostridiales	f__Lachnospiraceae	g__unclassified	s__unclassified	number.1 gg_id:00000 some annotation	0	0	0	0	0	0	0	0	28	0	0	0	0	0	0	0	0	0	0	0	0	0	0	0	0	0	0	0	0	0	0	0	0	0	0	0	0	0	0	0	0
181076	k__Bacteria	p__Proteobacteria	c__Gammaproteobacteria	o__Xanthomonadales	f__Xanthomonadaceae	g__Stenotrophomonas	s__unclassified	number.1 gg_id:00000 some annotation	0	0	0	0	0	1	0	0	0	1	0	0	0	0	0	0	0	0	0	0	0	0	0	0	0	1	0	0	0	0	0	0	0	0	0	0	0	0	0	0	0
588534	k__Bacteria	p__Firmicutes	c__Clostridia	o__Clostridiales	f__Lachnospiraceae	g__unclassified	s__unclassified	number.1 gg_id:00000 some annotation	0	0	0	0	0	0	0	0	0	0	0	0	0	0	0	0	0	0	0	0	0	0	0	0	0	0	0	0	0	78	0	0	0	0	0	0	0	0	0	0	0
196815	k__Bacteria	p__Firmicutes	c__Clostridia	o__Clostridiales	f__Ruminococcaceae	g__unclassified	s__unclassified	number.1 gg_id:00000 some annotation	0	0	0	0	0	0	0	0	0	0	0	0	0	0	0	0	0	0	0	0	0	0	0	0	0	0	0	0	0	1	0	0	0	0	0	0	0	0	0	0	0
190307	k__Bacteria	p__Firmicutes	c__Clostridia	o__Clostridiales	f__Lachnospiraceae	g__Coprococcus	s__unclassified	number.1 gg_id:00000 some annotation	0	0	0	0	0	0	0	0	0	0	0	0	0	0	0	0	0	0	0	0	0	0	0	0	0	0	0	0	0	2	0	0	0	0	0	0	0	0	0	0	0
270517	k__Bacteria	p__Actinobacteria	c__Actinobacteria	o__Actinomycetales	f__Cellulomonadaceae	g__unclassified	s__unclassified	number.1 gg_id:00000 some annotation	0	0	0	0	0	0	0	0	0	0	0	0	0	0	0	0	0	0	0	0	0	0	0	0	0	0	0	0	0	0	0	0	0	0	0	0	0	0	0	0	0
102681	k__Bacteria	p__Actinobacteria	c__Actinobacteria	o__Actinomycetales	f__Intrasporangiaceae	g__unclassified	s__unclassified	number.1 gg_id:00000 some annotation	0	0	0	0	0	0	0	0	0	0	0	0	0	0	0	1	0	0	0	0	0	0	0	0	0	0	0	0	0	0	0	0	0	0	0	0	0	0	0	0	0
362851	k__Bacteria	p__Actinobacteria	c__Actinobacteria	o__Actinomycetales	f__Corynebacteriaceae	g__Corynebacterium	s__unclassified	number.1 gg_id:00000 some annotation	0	0	0	0	0	0	0	0	0	0	0	0	0	0	0	0	0	0	0	0	0	0	0	0	0	0	0	0	0	0	0	0	0	0	0	0	0	0	0	0	0
49616	k__Bacteria	p__Proteobacteria	c__Gammaproteobacteria	o__Pasteurellales	f__Pasteurellaceae	g__Haemophilus	s__Haemophilus_influenzae	number.1 gg_id:00000 some annotation	0	1	0	0	13	0	0	0	0	7	7	0	0	0	1	1	0	0	0	0	0	109	115	0	0	0	0	0	1	0	0	0	44	0	0	3	27	0	2	0	0
70628	k__Bacteria	p__Fusobacteria	c__Fusobacteria	o__Fusobacteriales	f__Fusobacteriaceae	g__Leptotrichia	s__unclassified	number.1 gg_id:00000 some annotation	9	2	7	0	2	0	61	2	10	0	1	0	52	20	0	73	48	87	0	16	0	110	13	3	1	0	656	3	83	0	2	672	3	0	15	0	803	1	0	0	59
470973	k__Bacteria	p__Firmicutes	c__Clostridia	o__Clostridiales	f__Lachnospiraceae	g__Ruminococcus	s__unclassified	number.1 gg_id:00000 some annotation	0	0	0	0	0	1	0	0	0	0	0	0	0	0	1	0	0	0	0	0	0	0	0	0	0	0	0	0	0	0	0	0	0	0	0	0	0	0	0	0	0
2173	k__Bacteria	p__Bacteroidetes	c__Bacteroidia	o__Bacteroidales	f__Prevotellaceae	g__Prevotella	s__unclassified	number.1 gg_id:00000 some annotation	0	1	0	0	0	0	0	0	0	0	0	3	18	2	0	1	3	0	1	0	12	0	0	0	0	0	1	0	0	0	0	0	0	0	0	0	0	0	0	0	0
334697	k__Bacteria	p__Firmicutes	c__Clostridia	o__Clostridiales	f__Lachnospiraceae	g__unclassified	s__unclassified	number.1 gg_id:00000 some annotation	0	0	0	0	0	0	1	0	0	0	0	0	0	0	0	0	0	0	0	0	0	0	0	0	0	0	0	0	0	0	0	0	0	0	0	0	0	0	0	0	0
2176	k__Bacteria	p__Bacteroidetes	c__Bacteroidia	o__Bacteroidales	f__Prevotellaceae	g__Prevotella	s__unclassified	number.1 gg_id:00000 some annotation	0	0	0	0	0	0	0	0	0	0	0	1	0	12	0	0	0	0	2	4	17	0	5	0	1	0	0	0	0	0	0	0	13	0	0	0	0	0	0	0	0
15382	k__Bacteria	p__Firmicutes	c__Bacilli	o__Lactobacillales	f__Streptococcaceae	g__Streptococcus	s__unclassified	number.1 gg_id:00000 some annotation	0	22	22	78	1	8	2	3	0	5	5	124	1	225	149	35	75	0	0	0	1	1	1	0	25	234	0	1	8	0	8	0	2	0	1	101	0	3	8	17	0
49295	k__Bacteria	p__Proteobacteria	c__Deltaproteobacteria	o__Bdellovibrionales	f__Bdellovibrionaceae	g__Bdellovibrio	s__Bdellovibrio_bacteriovorus	number.1 gg_id:00000 some annotation	0	0	0	0	0	0	0	0	0	0	0	0	0	0	0	0	0	0	0	0	0	0	0	0	0	0	0	0	0	0	0	0	0	0	0	0	0	0	0	0	0
274278	k__Bacteria	p__Actinobacteria	c__Actinobacteria	o__Actinomycetales	f__Dermabacteraceae	g__unclassified	s__unclassified	number.1 gg_id:00000 some annotation	0	0	0	0	0	0	0	0	0	0	0	0	0	0	0	0	0	0	0	0	0	0	0	0	0	0	0	0	0	0	0	0	0	0	0	0	0	0	0	0	0
49274	k__Bacteria	p__Firmicutes	c__Clostridia	o__Clostridiales	f__Lachnospiraceae	g__Clostridium	s__unclassified	number.1 gg_id:00000 some annotation	0	0	0	0	0	0	1	0	0	0	0	0	0	0	0	0	0	0	0	0	0	0	0	0	0	0	0	0	0	0	0	0	0	0	0	0	0	0	0	0	0
1931	k__Bacteria	p__Bacteroidetes	c__Bacteroidia	o__Bacteroidales	f__Porphyromonadaceae	g__Porphyromonas	s__unclassified	number.1 gg_id:00000 some annotation	0	0	0	0	0	0	1	2	8	0	0	0	18	7	0	1	0	0	0	0	0	0	0	0	0	0	40	0	1	0	0	1	0	0	1	0	0	0	0	0	64
530785	k__Bacteria	p__Bacteroidetes	c__Bacteroidia	o__Bacteroidales	f__Porphyromonadaceae	g__Dysgonomonas	s__unclassified	number.1 gg_id:00000 some annotation	0	0	0	0	0	0	0	0	0	0	0	0	0	0	0	0	0	0	0	0	0	0	0	0	0	0	0	0	0	0	0	0	0	0	0	0	0	0	0	0	0
367488	k__Bacteria	p__Firmicutes	c__Bacilli	o__Bacillales	f__unclassified	g__unclassified	s__unclassified	number.1 gg_id:00000 some annotation	0	0	0	0	0	0	0	0	0	0	0	0	0	0	0	0	0	0	0	0	0	2	0	0	0	0	0	0	0	1	0	0	0	0	0	0	0	0	0	0	0
347862	k__Bacteria	p__Bacteroidetes	c__Bacteroidia	o__Bacteroidales	f__Porphyromonadaceae	g__Odoribacter	s__unclassified	number.1 gg_id:00000 some annotation	0	0	0	0	0	0	0	0	0	0	0	0	0	0	0	0	0	0	0	0	0	0	0	0	0	0	0	0	0	0	0	0	0	0	0	0	0	0	0	0	0
22981	k__Bacteria	p__Proteobacteria	c__Betaproteobacteria	o__Neisseriales	f__Neisseriaceae	g__unclassified	s__unclassified	number.1 gg_id:00000 some annotation	0	994	0	0	0	0	0	0	0	0	0	0	0	0	0	0	0	0	0	0	0	0	0	0	0	0	0	0	0	0	0	0	0	0	1	0	0	0	0	0	0
188900	k__Bacteria	p__Firmicutes	c__Clostridia	o__Clostridiales	f__Ruminococcaceae	g__Faecalibacterium	s__unclassified	number.1 gg_id:00000 some annotation	0	0	0	0	0	0	0	0	0	0	0	0	0	0	0	0	0	0	0	0	0	0	1	0	0	0	0	0	0	0	0	0	0	0	0	0	0	0	0	0	0
583769	k__Bacteria	p__Bacteroidetes	c__Bacteroidia	o__Bacteroidales	f__Bacteroidaceae	g__Bacteroides	s__unclassified	number.1 gg_id:00000 some annotation	0	0	0	0	0	1	0	0	0	0	0	0	0	0	0	0	0	0	0	0	0	0	0	0	0	0	0	0	0	0	0	0	0	0	0	0	0	0	0	0	0
210269	k__Bacteria	p__Proteobacteria	c__Gammaproteobacteria	o__Enterobacteriales	f__Enterobacteriaceae	g__unclassified	s__unclassified	number.1 gg_id:00000 some annotation	0	0	1	1	0	0	0	0	73	0	10	0	0	0	0	0	1	0	0	2	0	396	1	0	0	3	0	0	2	356	3	0	0	408	0	1	0	1	0	0	0
563824	k__Bacteria	p__Proteobacteria	c__Gammaproteobacteria	o__Pasteurellales	f__Pasteurellaceae	g__Pasteurella	s__Pasteurella_pneumotropica	number.1 gg_id:00000 some annotation	0	0	0	0	1	0	0	0	0	0	1	0	0	1	0	0	0	0	0	0	0	0	2	0	0	0	0	0	0	0	0	0	0	0	0	0	12	0	0	0	0
198251	k__Bacteria	p__Firmicutes	c__Clostridia	o__Clostridiales	f__Lachnospiraceae	g__Ruminococcus	s__Ruminococcus_gnavus	number.1 gg_id:00000 some annotation	0	1	0	0	0	0	0	0	0	0	0	0	0	0	0	0	0	0	0	0	0	0	0	0	0	0	0	0	0	269	0	0	0	0	0	0	0	0	0	0	3
169775	k__Bacteria	p__Bacteroidetes	c__Bacteroidia	o__Bacteroidales	f__Bacteroidaceae	g__Bacteroides	s__Bacteroides_ovatus	number.1 gg_id:00000 some annotation	0	0	0	0	0	0	0	0	0	0	0	0	0	0	0	0	0	0	0	0	0	0	0	0	0	0	0	0	0	1	0	0	0	0	0	0	0	0	0	0	0
133103	k__Bacteria	p__Bacteroidetes	c__Bacteroidia	o__Bacteroidales	f__RikenellaceaeII	g__unclassified	s__unclassified	number.1 gg_id:00000 some annotation	0	0	0	0	0	0	0	0	36	0	0	0	0	0	0	0	0	0	0	0	0	0	0	0	0	0	0	0	0	7	0	0	0	9	0	0	0	0	0	0	0
277679	k__Bacteria	p__Proteobacteria	c__Betaproteobacteria	o__Burkholderiales	f__unclassified	g__unclassified	s__unclassified	number.1 gg_id:00000 some annotation	0	0	0	0	0	0	0	0	0	0	0	0	0	0	0	0	0	0	0	0	0	0	0	0	0	0	0	0	0	0	0	0	0	0	0	0	0	0	0	0	0
71957	k__Bacteria	p__Bacteroidetes	c__Flavobacteria	o__Flavobacteriales	f__Flavobacteriaceae	g__Capnocytophaga	s__unclassified	number.1 gg_id:00000 some annotation	0	0	0	0	0	0	2	0	0	0	0	0	0	0	0	0	0	0	0	0	0	0	0	0	0	0	0	0	0	0	0	0	0	0	0	0	0	0	0	0	0
270993	k__Bacteria	p__Firmicutes	c__Clostridia	o__Clostridiales	f__Ruminococcaceae	g__unclassified	s__unclassified	number.1 gg_id:00000 some annotation	0	0	0	0	0	0	0	0	0	0	0	0	0	0	0	0	0	0	0	0	0	0	0	0	0	0	0	0	0	107	0	0	0	0	0	0	0	0	0	0	0
143718	k__Bacteria	p__Firmicutes	c__Bacilli	o__unclassified	f__unclassified	g__unclassified	s__unclassified	number.1 gg_id:00000 some annotation	0	0	0	0	0	0	0	0	0	0	0	0	0	0	1	0	0	0	0	0	0	0	0	0	0	0	0	0	0	0	1	0	0	0	0	0	0	0	0	1	0
252508	k__Bacteria	p__Bacteroidetes	c__Bacteroidia	o__Bacteroidales	f__Porphyromonadaceae	g__Parabacteroides	s__Parabacteroides_distasonis	number.1 gg_id:00000 some annotation	0	0	0	0	0	0	0	0	0	0	0	0	0	0	0	0	0	0	0	0	0	0	0	0	0	0	0	0	0	1	0	0	0	0	0	0	0	0	0	0	0
175377	k__Bacteria	p__Firmicutes	c__Clostridia	o__Clostridiales	f__Ruminococcaceae	g__unclassified	s__unclassified	number.1 gg_id:00000 some annotation	0	0	0	0	0	0	0	0	0	0	0	0	0	0	0	0	0	0	0	0	0	0	0	0	0	0	0	0	0	0	0	0	0	0	0	0	0	0	0	0	0
314786	k__Bacteria	p__Firmicutes	c__Clostridia	o__Clostridiales	f__Lachnospiraceae	g__unclassified	s__unclassified	number.1 gg_id:00000 some annotation	0	0	0	0	0	0	0	0	0	0	0	0	0	0	0	0	0	0	0	0	0	0	0	0	0	0	0	0	0	0	0	0	0	0	0	0	0	0	0	0	0
146564	k__Bacteria	p__Firmicutes	c__Clostridia	o__Clostridiales	f__Lachnospiraceae	g__unclassified	s__unclassified	number.1 gg_id:00000 some annotation	0	0	0	0	0	0	0	0	0	0	0	0	0	0	0	0	0	0	0	0	0	0	0	0	0	0	0	0	0	4	0	0	0	0	0	0	0	0	0	0	0
137026	k__Bacteria	p__Firmicutes	c__Bacilli	o__Lactobacillales	f__Lactobacillaceae	g__Lactobacillus	s__Lactobacillus_agilis	number.1 gg_id:00000 some annotation	0	0	0	0	0	0	0	0	0	0	0	0	0	0	0	0	0	0	0	0	0	0	0	0	0	0	0	0	0	0	0	0	0	36	0	0	0	0	0	0	0
157564	k__Bacteria	p__Proteobacteria	c__Betaproteobacteria	o__Burkholderiales	f__Oxalobacteraceae	g__Collimonas	s__unclassified	number.1 gg_id:00000 some annotation	0	0	0	0	0	0	0	0	0	0	0	0	0	0	0	0	0	0	0	0	0	0	0	0	0	0	0	0	0	0	0	0	0	0	0	0	0	0	0	0	0
243500	k__Bacteria	p__Proteobacteria	c__Betaproteobacteria	o__Burkholderiales	f__Burkholderiaceae	g__Burkholderia	s__unclassified	number.1 gg_id:00000 some annotation	0	0	0	0	0	0	0	0	0	0	0	0	0	0	0	0	0	0	0	0	0	0	0	0	0	0	0	0	0	0	0	0	0	0	0	0	0	0	0	0	0
255362	k__Bacteria	p__Firmicutes	c__Clostridia	o__Clostridiales	f__Lachnospiraceae	g__unclassified	s__unclassified	number.1 gg_id:00000 some annotation	0	0	0	0	0	0	0	0	0	0	0	0	0	0	0	0	0	0	0	0	0	0	0	0	0	0	0	0	0	59	0	0	0	0	0	0	0	0	0	0	0
252321	k__Bacteria	p__Firmicutes	c__Bacilli	o__Lactobacillales	f__Lactobacillaceae	g__Lactobacillus	s__Lactobacillus_crispatus	number.1 gg_id:00000 some annotation	0	0	0	0	0	0	0	0	0	0	0	1	0	0	0	0	0	0	0	0	0	0	0	0	0	0	0	0	0	0	0	0	0	0	0	0	0	0	0	0	0
325622	k__Bacteria	p__Bacteroidetes	c__Bacteroidia	o__Bacteroidales	f__RikenellaceaeII	g__unclassified	s__unclassified	number.1 gg_id:00000 some annotation	0	0	0	0	0	0	0	0	0	0	0	0	0	0	0	0	0	0	0	0	0	0	0	0	0	0	0	0	0	0	0	0	0	0	0	0	0	0	0	0	0
191900	k__Bacteria	p__Firmicutes	c__Clostridia	o__Clostridiales	f__Lachnospiraceae	g__Blautia	s__unclassified	number.1 gg_id:00000 some annotation	0	0	0	0	0	0	0	0	0	0	0	0	0	0	0	0	0	0	0	0	0	0	0	0	0	0	0	0	0	0	0	0	0	2	0	0	0	0	0	0	0
484430	k__Bacteria	p__Proteobacteria	c__Epsilonproteobacteria	o__Campylobacterales	f__Campylobacteraceae	g__Campylobacter	s__unclassified	number.1 gg_id:00000 some annotation	0	0	0	0	1	0	14	0	6	19	17	29	5	44	19	14	3	86	28	1560	15	0	1147	0	0	1	0	1	4	0	1	812	2	1	33	3	47	0	9	0	2
565720	k__Bacteria	p__Spirochaetes	c__Spirochaetes	o__Spirochaetales	f__Spirochaetaceae	g__Treponema	s__Treponema_parvum	number.1 gg_id:00000 some annotation	0	0	0	0	0	0	0	0	0	0	0	0	0	0	0	0	0	0	0	2	0	0	13	0	0	0	0	0	0	0	0	0	0	0	0	0	0	0	0	0	0
197765	k__Bacteria	p__Firmicutes	c__Clostridia	o__Clostridiales	f__Lachnospiraceae	g__unclassified	s__unclassified	number.1 gg_id:00000 some annotation	0	0	0	0	0	0	0	0	0	0	0	0	0	0	0	0	0	0	0	0	0	0	0	0	0	0	0	0	0	157	0	0	0	0	0	0	0	0	0	0	0
234533	k__Bacteria	p__Bacteroidetes	c__Bacteroidia	o__Bacteroidales	f__RikenellaceaeII	g__unclassified	s__unclassified	number.1 gg_id:00000 some annotation	0	0	0	0	0	0	0	2	967	0	3	0	0	0	3	0	0	0	0	1	0	0	0	0	0	0	0	0	0	928	0	0	0	605	0	1	0	0	0	1	0
174625	k__Bacteria	p__Firmicutes	c__Clostridia	o__Clostridiales	f__Lachnospiraceae	g__Coprococcus	s__unclassified	number.1 gg_id:00000 some annotation	0	0	0	0	0	0	0	0	0	0	0	0	0	0	0	0	0	0	0	0	0	0	0	0	0	0	0	0	0	144	0	0	0	0	0	0	0	0	0	0	0
155948	k__Bacteria	p__Firmicutes	c__Clostridia	o__Clostridiales	f__Veillonellaceae	g__Veillonella	s__unclassified	number.1 gg_id:00000 some annotation	0	0	0	0	0	3	0	0	0	0	0	0	17	87	3	86	0	0	0	0	0	58	30	0	0	0	1	0	0	1	0	0	0	0	4	0	1	0	0	0	0
169991	k__Bacteria	p__Firmicutes	c__Bacilli	o__Lactobacillales	f__Streptococcaceae	g__Streptococcus	s__unclassified	number.1 gg_id:00000 some annotation	0	0	0	0	0	0	0	0	0	0	0	0	0	0	0	0	0	0	0	0	0	0	0	0	0	0	0	0	0	0	0	0	0	0	0	0	0	0	0	0	0
591399	k__Bacteria	p__Firmicutes	c__Clostridia	o__Clostridiales	f__Lachnospiraceae	g__unclassified	s__unclassified	number.1 gg_id:00000 some annotation	0	0	0	0	0	0	0	0	0	0	0	0	0	0	0	0	0	0	0	0	0	0	0	0	0	0	0	0	0	0	0	0	0	0	0	0	0	0	0	0	0
237323	k__Bacteria	p__Bacteroidetes	c__Bacteroidia	o__Bacteroidales	f__Porphyromonadaceae	g__Tannerella	s__unclassified	number.1 gg_id:00000 some annotation	0	1	0	0	1	0	3	0	0	6	82	0	23	2	2	53	0	3	0	14	0	176	124	32	0	0	10	0	51	0	3	0	6	0	20	0	169	5	0	0	82
262994	k__Bacteria	p__Firmicutes	c__Clostridia	o__Clostridiales	f__Lachnospiraceae	g__unclassified	s__unclassified	number.1 gg_id:00000 some annotation	0	0	0	0	0	0	0	0	273	0	0	0	0	0	0	0	0	0	0	0	0	0	0	0	0	0	0	0	0	0	0	0	0	0	0	0	0	0	0	0	0
213896	k__Bacteria	p__Firmicutes	c__Clostridia	o__Clostridiales	f__Lachnospiraceae	g__Clostridium	s__unclassified	number.1 gg_id:00000 some annotation	0	0	0	0	0	0	0	0	77	0	0	0	0	0	0	0	0	0	0	0	0	0	0	0	0	0	0	0	0	0	0	0	0	0	0	0	0	0	0	0	0
431304	k__Bacteria	p__Firmicutes	c__Clostridia	o__Clostridiales	f__Lachnospiraceae	g__unclassified	s__unclassified	number.1 gg_id:00000 some annotation	0	0	0	0	0	0	0	0	0	0	0	0	0	0	0	0	0	0	0	0	0	0	0	0	0	0	0	0	0	0	0	0	0	0	0	0	0	0	0	0	0
175007	k__Bacteria	p__Firmicutes	c__Clostridia	o__Clostridiales	f__Lachnospiraceae	g__Eubacterium	s__unclassified	number.1 gg_id:00000 some annotation	0	0	0	0	0	0	0	0	0	0	0	0	0	0	0	0	0	0	0	0	0	0	0	0	0	0	0	0	0	0	0	0	0	1	0	0	0	0	0	0	0
182994	k__Bacteria	p__Firmicutes	c__Clostridia	o__Clostridiales	f__Lachnospiraceae	g__Roseburia	s__Eubacterium_rectale	number.1 gg_id:00000 some annotation	0	0	0	0	0	0	0	0	0	0	2	0	0	0	0	0	0	0	0	0	0	0	0	0	0	0	0	0	4	0	0	0	0	0	0	0	0	0	0	0	0
563485	k__Bacteria	p__Proteobacteria	c__Gammaproteobacteria	o__Enterobacteriales	f__Enterobacteriaceae	g__Erwinia	s__unclassified	number.1 gg_id:00000 some annotation	0	0	0	0	0	0	0	0	0	0	0	0	0	0	0	0	0	0	0	0	0	1	0	0	0	0	0	0	0	0	0	0	0	3	0	0	0	0	0	0	0
361304	k__Bacteria	p__Bacteroidetes	c__Bacteroidia	o__Bacteroidales	f__Bacteroidaceae	g__Bacteroides	s__unclassified	number.1 gg_id:00000 some annotation	0	0	0	0	0	0	0	0	0	0	0	0	0	0	0	0	0	0	0	0	0	0	0	0	0	0	0	0	0	2	0	0	0	1	0	0	0	0	0	0	0
154802	k__Bacteria	p__Firmicutes	c__Bacilli	o__Lactobacillales	f__Streptococcaceae	g__Streptococcus	s__unclassified	number.1 gg_id:00000 some annotation	0	0	1	0	1	2	0	0	0	0	2	0	0	0	0	0	0	0	0	0	0	1	0	0	0	0	0	1	0	0	1	0	0	0	0	2	0	0	1	0	2
276037	k__Bacteria	p__Firmicutes	c__Clostridia	o__Clostridiales	f__Lachnospiraceae	g__unclassified	s__unclassified	number.1 gg_id:00000 some annotation	0	0	0	0	0	0	0	0	1	0	0	0	0	0	0	0	0	0	0	0	0	0	0	0	0	0	0	0	0	0	0	0	0	0	0	0	0	0	0	0	0
575562	k__Bacteria	p__Proteobacteria	c__Betaproteobacteria	o__Burkholderiales	f__Comamonadaceae	g__unclassified	s__unclassified	number.1 gg_id:00000 some annotation	0	0	3	0	0	0	2	0	4	1	0	0	4	0	0	2	0	0	0	0	0	8	1	0	0	0	0	0	4	1	0	0	0	0	0	1	0	0	0	0	0
385442	k__Bacteria	p__Bacteroidetes	c__Bacteroidia	o__Bacteroidales	f__RikenellaceaeII	g__unclassified	s__unclassified	number.1 gg_id:00000 some annotation	0	0	0	0	0	0	0	0	0	0	0	0	0	0	0	0	0	0	0	0	0	0	0	0	0	0	0	0	0	0	0	0	0	0	0	0	0	0	0	0	0
245050	k__Bacteria	p__Bacteroidetes	c__Bacteroidia	o__Bacteroidales	f__Prevotellaceae	g__Prevotella	s__unclassified	number.1 gg_id:00000 some annotation	0	0	0	0	0	0	0	0	0	0	0	0	0	0	0	0	0	0	0	0	0	0	0	0	0	0	0	0	0	0	0	0	0	0	3	0	0	0	0	0	0
6721	k__Bacteria	p__Proteobacteria	c__Betaproteobacteria	o__Rhodocyclales	f__Rhodocyclaceae	g__Rhodocyclus	s__Rhodocyclus_tenuis	number.1 gg_id:00000 some annotation	0	0	0	0	0	0	0	0	0	0	0	0	0	0	0	0	0	0	0	0	0	0	0	0	0	0	0	0	1	0	0	0	0	0	0	0	0	0	0	0	0
6725	k__Bacteria	p__Proteobacteria	c__Betaproteobacteria	o__Rhodocyclales	f__Rhodocyclaceae	g__Rhodocyclus	s__Rhodocyclus_tenuis	number.1 gg_id:00000 some annotation	0	0	0	0	0	0	0	0	0	0	0	0	0	0	0	0	0	0	0	0	0	0	0	0	0	0	0	0	0	0	0	0	0	0	0	0	0	0	0	0	0
225949	k__Bacteria	p__Proteobacteria	c__Betaproteobacteria	o__Burkholderiales	f__Oxalobacteraceae	g__Massilia	s__Massilia_timonae	number.1 gg_id:00000 some annotation	0	0	0	0	1	0	0	0	0	0	0	0	0	0	0	0	0	0	0	0	0	0	0	0	0	0	0	0	0	0	0	0	0	0	0	0	0	0	0	0	0
35624	k__Bacteria	p__Firmicutes	c__Bacilli	o__Lactobacillales	f__Streptococcaceae	g__Streptococcus	s__unclassified	number.1 gg_id:00000 some annotation	0	0	0	0	0	0	0	0	0	0	0	0	0	0	0	0	0	0	0	0	0	0	0	0	0	0	0	0	0	0	0	0	0	0	0	1	0	0	0	0	0
366237	k__Bacteria	p__Firmicutes	c__Clostridia	o__Clostridiales	f__Lachnospiraceae	g__unclassified	s__unclassified	number.1 gg_id:00000 some annotation	0	0	0	0	0	0	0	0	0	0	0	0	0	0	0	0	0	0	0	0	0	0	0	0	0	0	0	0	0	0	0	0	0	1	0	0	0	0	0	0	0
469486	k__Bacteria	p__Proteobacteria	c__Gammaproteobacteria	o__Pseudomonadales	f__Moraxellaceae	g__Acinetobacter	s__unclassified	number.1 gg_id:00000 some annotation	0	0	1	0	2	0	0	0	1	0	0	0	0	0	0	0	0	0	0	0	0	41	0	0	0	2	0	0	4	0	0	0	0	0	0	0	0	0	0	0	9
308400	k__Bacteria	p__Firmicutes	c__Clostridia	o__Clostridiales	f__Lachnospiraceae	g__unclassified	s__unclassified	number.1 gg_id:00000 some annotation	0	0	0	0	0	0	0	0	0	0	0	0	0	0	0	0	0	0	0	0	0	0	0	0	0	0	0	0	0	0	0	0	0	0	0	0	0	0	0	0	0
469482	k__Bacteria	p__Firmicutes	c__Clostridia	o__Clostridiales	f__Veillonellaceae	g__Acidaminococcus	s__Acidaminococcus_fermentans	number.1 gg_id:00000 some annotation	0	0	0	0	0	0	0	0	28	0	0	0	0	0	0	0	0	0	0	0	0	0	0	0	0	0	0	2	0	0	0	0	0	0	0	0	0	0	0	0	0
93158	k__Bacteria	p__Fusobacteria	c__Fusobacteria	o__Fusobacteriales	f__Fusobacteriaceae	g__Leptotrichia	s__unclassified	number.1 gg_id:00000 some annotation	0	0	0	0	3	0	0	0	0	0	0	0	3	4	0	0	19	5	0	0	0	0	0	0	0	0	0	0	0	0	0	0	1	0	3	0	0	0	0	0	0
86047	k__Bacteria	p__Proteobacteria	c__Gammaproteobacteria	o__Pasteurellales	f__Pasteurellaceae	g__unclassified	s__unclassified	number.1 gg_id:00000 some annotation	0	8	0	12	0	0	0	2	0	0	0	0	0	0	1	1	0	1	0	0	1	1	0	0	0	0	0	2	1	1	1	0	0	0	1	1	0	0	2	0	0
536311	k__Bacteria	p__Proteobacteria	c__Betaproteobacteria	o__Neisseriales	f__Neisseriaceae	g__unclassified	s__unclassified	number.1 gg_id:00000 some annotation	0	0	0	0	0	1	0	0	0	0	0	0	0	0	0	0	0	0	0	0	0	0	0	0	0	0	0	0	0	0	0	0	0	0	0	0	1	0	0	0	0
544153	k__Bacteria	p__Bacteroidetes	c__Flavobacteria	o__Flavobacteriales	f__Flavobacteriaceae	g__Flavobacterium	s__Flavobacterium_succinicans	number.1 gg_id:00000 some annotation	0	0	0	0	0	0	0	0	0	0	0	0	0	0	0	0	0	0	0	0	0	0	0	0	0	0	0	0	0	0	0	0	0	0	0	0	0	0	0	0	0
3852	k__Bacteria	p__Spirochaetes	c__Spirochaetes	o__Spirochaetales	f__Spirochaetaceae	g__Treponema	s__Treponema_amylovorum	number.1 gg_id:00000 some annotation	0	0	0	0	0	0	0	0	0	0	0	0	0	61	2	0	0	0	0	805	65	0	1	0	0	0	0	0	0	0	0	0	0	0	153	4	0	0	0	0	0
343985	k__Bacteria	p__Firmicutes	c__Clostridia	o__Clostridiales	f__Lachnospiraceae	g__unclassified	s__unclassified	number.1 gg_id:00000 some annotation	0	0	0	0	0	0	0	0	0	0	0	0	0	0	0	0	0	0	0	0	0	0	0	0	0	0	0	0	0	4	0	0	0	0	0	0	0	0	0	0	0
241170	k__Bacteria	p__Proteobacteria	c__Epsilonproteobacteria	o__Campylobacterales	f__Campylobacteraceae	g__Campylobacter	s__Campylobacter_curvus	number.1 gg_id:00000 some annotation	0	0	0	0	0	0	0	0	0	0	19	0	0	0	0	0	0	0	0	0	0	0	0	0	0	0	0	0	0	0	0	0	0	0	0	0	0	0	0	0	5
279358	k__Bacteria	p__Proteobacteria	c__Alphaproteobacteria	o__Caulobacterales	f__Caulobacteraceae	g__Phenylobacterium	s__unclassified	number.1 gg_id:00000 some annotation	0	0	0	0	0	0	0	0	6	0	0	0	0	0	0	0	0	0	0	0	0	0	0	0	0	0	0	0	0	0	0	0	0	0	0	0	0	0	0	0	0
92717	k__Bacteria	p__Firmicutes	c__Clostridia	o__Clostridiales	f__Clostridiales_Family_XIII._Incertae_Sedis	g__unclassified	s__unclassified	number.1 gg_id:00000 some annotation	0	0	0	0	0	0	0	0	0	0	0	0	0	0	0	0	0	0	0	53	0	0	0	0	0	0	0	0	0	0	0	0	0	0	1	0	0	0	0	0	0
3859	k__Bacteria	p__Spirochaetes	c__Spirochaetes	o__Spirochaetales	f__Spirochaetaceae	g__Treponema	s__Treponema_amylovorum	number.1 gg_id:00000 some annotation	0	0	0	0	0	0	0	0	0	0	0	0	0	27	4	0	0	0	0	2	0	0	0	0	0	0	0	0	0	0	0	0	0	0	22	0	0	0	0	0	0
165694	k__Bacteria	p__Bacteroidetes	c__Flavobacteria	o__Flavobacteriales	f__Flavobacteriaceae	g__Capnocytophaga	s__Capnocytophaga_ochracea	number.1 gg_id:00000 some annotation	0	0	0	0	0	0	1	1	1	0	0	4	4	0	5	0	0	0	0	0	1	0	244	0	0	0	0	0	0	0	0	0	0	0	1	2	112	0	0	0	0
92034	k__Bacteria	p__Firmicutes	c__Clostridia	o__Clostridiales	f__Veillonellaceae	g__Selenomonas	s__unclassified	number.1 gg_id:00000 some annotation	1	0	0	0	0	0	2	0	0	5	7	6	1	309	5	5	4	0	0	0	0	0	42	0	0	0	0	1	0	0	1	1	133	0	1	49	10	185	0	0	81
140393	k__Bacteria	p__Proteobacteria	c__Gammaproteobacteria	o__Pasteurellales	f__Pasteurellaceae	g__unclassified	s__unclassified	number.1 gg_id:00000 some annotation	0	0	0	0	0	0	0	0	0	0	0	0	2	0	0	0	0	0	0	0	0	0	0	0	0	0	0	0	0	0	0	8	0	0	0	0	2	0	0	0	3
286716	k__Bacteria	p__Bacteroidetes	c__Flavobacteria	o__Flavobacteriales	f__Flavobacteriaceae	g__unclassified	s__unclassified	number.1 gg_id:00000 some annotation	0	0	6	0	0	0	0	0	1	0	0	0	0	0	1	0	0	0	0	0	0	0	0	0	0	0	0	0	0	0	4	0	0	0	0	0	1	0	0	0	0
74407	k__Bacteria	p__Bacteroidetes	c__Bacteroidia	o__Bacteroidales	f__Prevotellaceae	g__Prevotella	s__unclassified	number.1 gg_id:00000 some annotation	0	0	0	0	0	0	0	0	0	0	0	13	0	0	0	0	0	1	0	1005	0	0	0	0	0	0	0	0	0	0	0	0	0	0	155	0	0	0	0	0	0
189189	k__Bacteria	p__Firmicutes	c__Clostridia	o__Clostridiales	f__Lachnospiraceae	g__Clostridium	s__unclassified	number.1 gg_id:00000 some annotation	0	0	0	0	0	0	0	0	14	0	0	0	0	0	0	0	0	0	0	0	0	0	0	0	0	0	0	0	0	0	0	0	0	0	0	0	0	0	0	0	0
53642	k__Bacteria	p__Firmicutes	c__Clostridia	o__Clostridiales	f__unclassified	g__unclassified	s__unclassified	number.1 gg_id:00000 some annotation	0	0	0	0	0	0	0	0	0	0	0	0	0	0	0	0	0	0	0	0	0	26	0	0	0	0	0	0	0	0	0	0	0	0	0	0	0	0	0	0	0
181649	k__Bacteria	p__Firmicutes	c__Clostridia	o__Clostridiales	f__Lachnospiraceae	g__Lachnospira	s__unclassified	number.1 gg_id:00000 some annotation	0	0	0	0	0	0	0	0	0	0	0	0	0	0	0	0	0	0	0	0	0	0	0	0	0	0	0	0	0	0	0	0	0	0	0	0	0	0	0	0	0
173654	k__Bacteria	p__Proteobacteria	c__Gammaproteobacteria	o__Enterobacteriales	f__Enterobacteriaceae	g__Escherichia	s__unclassified	number.1 gg_id:00000 some annotation	0	0	0	0	0	0	0	0	0	0	0	0	0	0	0	0	0	0	0	0	0	0	0	0	0	0	0	0	0	0	0	0	0	0	0	0	0	0	0	0	0
181882	k__Bacteria	p__Firmicutes	c__Clostridia	o__Clostridiales	f__Ruminococcaceae	g__Oscillospira	s__unclassified	number.1 gg_id:00000 some annotation	0	0	0	0	0	0	0	0	0	0	0	1	0	0	0	0	0	0	0	0	0	0	0	0	0	0	0	0	0	140	0	0	0	0	0	0	0	0	0	0	0
292302	k__Bacteria	p__Firmicutes	c__Bacilli	o__Lactobacillales	f__Lactobacillaceae	g__Lactobacillus	s__unclassified	number.1 gg_id:00000 some annotation	0	0	0	0	0	0	0	0	0	0	0	0	0	0	3	0	0	0	0	0	0	0	0	0	0	0	0	0	0	73	0	0	0	89	0	0	0	0	0	0	0
260352	k__Bacteria	p__Firmicutes	c__Clostridia	o__Clostridiales	f__Ruminococcaceae	g__unclassified	s__unclassified	number.1 gg_id:00000 some annotation	0	0	0	0	0	0	0	0	0	0	0	0	0	0	0	0	0	0	0	0	0	0	0	0	0	0	0	0	0	0	0	0	0	0	0	0	1	0	0	0	0
63985	k__Bacteria	p__Proteobacteria	c__Betaproteobacteria	o__Neisseriales	f__Neisseriaceae	g__unclassified	s__unclassified	number.1 gg_id:00000 some annotation	0	0	0	0	0	0	0	0	0	0	0	0	0	0	0	0	0	0	0	0	2	0	0	0	1	0	0	0	0	0	0	0	0	0	1	0	0	0	0	0	0
105095	k__Bacteria	p__Bacteroidetes	c__Flavobacteria	o__Flavobacteriales	f__Flavobacteriaceae	g__Chryseobacterium	s__unclassified	number.1 gg_id:00000 some annotation	0	0	1	0	0	0	0	0	0	0	0	0	0	0	0	0	0	0	0	0	0	0	0	0	0	0	0	0	0	0	0	0	0	0	0	0	0	0	0	0	0
305263	k__Bacteria	p__Firmicutes	c__Bacilli	o__Lactobacillales	f__Streptococcaceae	g__Streptococcus	s__unclassified	number.1 gg_id:00000 some annotation	0	0	0	0	0	0	0	0	0	0	0	0	0	0	1	0	0	0	0	0	0	0	0	0	0	0	0	0	0	0	0	0	0	0	0	0	0	0	0	0	0
236466	k__Bacteria	p__Actinobacteria	c__Actinobacteria	o__Actinomycetales	f__Microbacteriaceae	g__Agromyces	s__unclassified	number.1 gg_id:00000 some annotation	0	0	0	0	0	0	0	0	0	0	0	0	0	0	0	0	0	0	0	0	0	1	0	0	0	0	0	0	0	0	0	0	0	0	0	0	0	0	0	0	0
4551	k__Bacteria	p__Proteobacteria	c__Alphaproteobacteria	o__Rickettsiales	f__Odyssellaceae	g__Candidatus_Odyssella	s__unclassified	number.1 gg_id:00000 some annotation	0	0	1	0	0	0	0	0	0	0	0	0	0	0	0	0	0	0	0	0	0	0	0	0	0	0	0	0	0	0	0	0	0	0	0	0	0	0	0	0	0
470805	k__Bacteria	p__Firmicutes	c__Clostridia	o__Clostridiales	f__Clostridiales_Family_XI._Incertae_Sedis	g__Parvimonas	s__Parvimonas_micra	number.1 gg_id:00000 some annotation	0	0	0	0	0	0	17	0	0	3	7	10	56	52	3	4	0	0	0	8	8	45	2	0	0	0	42	1	7	0	0	1	3	0	12	1	4	0	0	0	75
470807	k__Bacteria	p__Bacteroidetes	c__Bacteroidia	o__Bacteroidales	f__Porphyromonadaceae	g__Porphyromonas	s__Porphyromonas_endodontalis	number.1 gg_id:00000 some annotation	0	0	1	0	4	1	0	1	0	0	0	43	313	257	45	1	0	1	41	334	4893	151	18	0	1	0	0	0	1	1	2	1	13	1	62	57	2	0	0	6	0
578508	k__Bacteria	p__Verrucomicrobia	c__Spartobacteria	o__Spartobacteriales	f__Spartobacteriaceae	g__Candidatus_Xiphinematobacter	s__unclassified	number.1 gg_id:00000 some annotation	0	0	0	0	0	0	0	0	0	0	0	0	0	0	0	0	0	0	0	0	0	1	0	0	0	0	0	0	0	0	0	0	0	0	0	0	0	0	0	0	0
253926	k__Bacteria	p__Bacteroidetes	c__Bacteroidia	o__Bacteroidales	f__Porphyromonadaceae	g__Porphyromonas	s__unclassified	number.1 gg_id:00000 some annotation	0	0	0	1	0	0	0	0	0	1	0	0	0	0	0	0	0	2	0	0	0	0	0	0	0	0	0	0	0	0	0	1	0	0	0	0	0	0	0	0	1
428705	k__Bacteria	p__Firmicutes	c__Bacilli	o__Bacillales	f__Staphylococcaceae	g__Staphylococcus	s__unclassified	number.1 gg_id:00000 some annotation	0	0	0	0	0	0	0	0	0	0	0	0	0	0	0	0	0	0	0	0	0	0	0	0	0	0	0	0	0	0	0	0	0	0	0	0	0	0	0	0	0
105783	k__Bacteria	p__Actinobacteria	c__Actinobacteria	o__Actinomycetales	f__Microbacteriaceae	g__unclassified	s__unclassified	number.1 gg_id:00000 some annotation	0	0	0	0	0	0	0	0	0	0	0	0	0	0	0	0	0	0	0	0	0	0	0	0	0	0	0	0	0	0	0	0	0	0	0	0	0	0	0	0	0
514963	k__Bacteria	p__Verrucomicrobia	c__Verrucomicrobiae	o__Verrucomicrobiales	f__unclassified	g__unclassified	s__unclassified	number.1 gg_id:00000 some annotation	0	0	0	0	0	0	0	0	0	0	0	0	0	0	0	0	0	0	0	0	0	0	0	0	0	0	0	0	0	0	0	0	0	0	0	0	0	0	0	0	0
553964	k__Bacteria	p__Proteobacteria	c__Gammaproteobacteria	o__Pseudomonadales	f__Moraxellaceae	g__Acinetobacter	s__Acinetobacter_guillouiae	number.1 gg_id:00000 some annotation	0	0	0	0	0	0	0	0	0	0	0	0	0	0	0	0	0	0	0	0	0	4	0	0	0	0	0	0	0	0	0	0	0	0	0	0	0	0	0	0	1
557059	k__Bacteria	p__Firmicutes	c__Bacilli	o__Lactobacillales	f__Enterococcaceae	g__Enterococcus	s__unclassified	number.1 gg_id:00000 some annotation	0	0	0	0	0	0	0	0	0	0	0	0	0	0	0	0	0	0	0	0	0	0	0	0	0	0	0	0	0	0	0	0	0	0	0	0	0	0	0	0	0
9485	k__Bacteria	p__Proteobacteria	c__Gammaproteobacteria	o__Pasteurellales	f__Pasteurellaceae	g__unclassified	s__unclassified	number.1 gg_id:00000 some annotation	0	0	0	0	0	0	0	0	0	0	0	0	0	0	0	0	0	0	0	0	0	0	0	0	0	0	0	0	0	0	0	0	0	0	0	0	0	0	0	0	0
236261	k__Bacteria	p__Firmicutes	c__Clostridia	o__Clostridiales	f__Lachnospiraceae	g__unclassified	s__unclassified	number.1 gg_id:00000 some annotation	0	0	0	0	0	0	0	0	0	0	0	0	5	4	0	0	0	0	0	0	0	0	1	0	0	0	0	0	0	0	0	0	0	0	1	0	9	0	0	0	0
301364	k__Bacteria	p__Firmicutes	c__Bacilli	o__Turicibacterales	f__Turicibacteraceae	g__Turicibacter	s__unclassified	number.1 gg_id:00000 some annotation	0	0	0	0	0	0	0	0	0	0	0	0	0	0	0	0	0	1	0	0	0	0	0	0	0	0	0	0	0	0	0	0	0	0	0	0	0	5	0	0	0
514694	k__Bacteria	p__Firmicutes	c__Bacilli	o__Lactobacillales	f__Lactobacillaceae	g__Lactobacillus	s__Lactobacillus_delbrueckii	number.1 gg_id:00000 some annotation	0	0	0	0	0	0	0	0	0	0	0	0	0	0	0	0	0	0	0	0	0	0	0	0	0	9	0	0	0	0	0	0	0	0	0	0	0	0	0	0	0
271906	k__Bacteria	p__Proteobacteria	c__Gammaproteobacteria	o__Pseudomonadales	f__Pseudomonadaceae	g__Pseudomonas	s__unclassified	number.1 gg_id:00000 some annotation	0	0	1	0	0	0	0	1	0	0	0	0	0	0	0	0	1	0	0	0	0	154	0	0	0	1	0	0	2	240	0	0	0	0	0	0	0	0	0	0	0
244707	k__Bacteria	p__Firmicutes	c__Bacilli	o__Lactobacillales	f__Streptococcaceae	g__Streptococcus	s__unclassified	number.1 gg_id:00000 some annotation	4	22	97	51	3	13	35	4	3	7	1	155	134	310	235	35	277	1	0	1	3	178	113	0	10	39	1	40	590	0	6	0	4	0	18	596	304	0	19	1	44
340449	k__Bacteria	p__Firmicutes	c__Clostridia	o__Clostridiales	f__Lachnospiraceae	g__unclassified	s__unclassified	number.1 gg_id:00000 some annotation	0	0	0	0	0	0	0	0	5	0	0	0	0	0	0	0	0	0	0	0	0	0	0	0	0	0	0	0	0	0	0	0	0	0	0	0	0	0	0	0	0
582179	k__Bacteria	p__Proteobacteria	c__Gammaproteobacteria	o__Pseudomonadales	f__Pseudomonadaceae	g__Pseudomonas	s__unclassified	number.1 gg_id:00000 some annotation	0	0	0	0	0	0	0	0	0	0	0	0	0	0	0	0	0	0	0	0	0	0	0	0	0	0	0	0	0	1	0	0	0	1	0	0	0	0	0	0	0
513402	k__Bacteria	p__Proteobacteria	c__Gammaproteobacteria	o__Pseudomonadales	f__Moraxellaceae	g__Acinetobacter	s__Acinetobacter_guillouiae	number.1 gg_id:00000 some annotation	0	1	13	0	22	5	1	3	24	11	4	6	5	3	0	5	11	0	0	0	0	855	1	1	0	11	0	0	28	0	0	0	0	0	0	0	0	28	0	0	64
104784	k__Bacteria	p__Verrucomicrobia	c__Spartobacteria	o__Spartobacteriales	f__Spartobacteriaceae	g__Chthoniobacter	s__unclassified	number.1 gg_id:00000 some annotation	0	0	0	0	0	0	1	0	0	0	0	0	0	0	0	0	0	0	0	0	0	0	0	0	0	0	0	0	0	0	0	0	0	0	0	0	0	0	0	0	0
9555	k__Bacteria	p__Proteobacteria	c__Gammaproteobacteria	o__Pasteurellales	f__Pasteurellaceae	g__unclassified	s__unclassified	number.1 gg_id:00000 some annotation	1	0	0	0	1	0	4	3	10	1	0	0	1	2	3	21	0	0	0	0	0	0	0	0	0	0	0	1	3	0	1	5	3	0	0	0	3	0	1	0	0
13034	k__Bacteria	p__Actinobacteria	c__Actinobacteria	o__Actinomycetales	f__Mycobacteriaceae	g__Mycobacterium	s__unclassified	number.1 gg_id:00000 some annotation	0	0	0	0	0	0	0	0	0	0	0	0	0	0	0	0	0	0	0	0	0	0	0	0	0	0	0	0	0	0	0	0	0	0	0	0	0	0	0	0	0
104780	k__Bacteria	p__Bacteroidetes	c__Bacteroidia	o__Bacteroidales	f__Rikenellaceae	g__Alistipes	s__unclassified	number.1 gg_id:00000 some annotation	0	0	0	0	0	0	0	0	0	0	0	0	0	0	0	0	0	0	0	0	0	0	0	0	0	0	0	0	0	1	0	0	0	0	0	0	0	0	0	0	0
14033	k__Bacteria	p__Firmicutes	c__Clostridia	o__Clostridiales	f__Lachnospiraceae	g__Clostridium	s__Clostridium_scindens	number.1 gg_id:00000 some annotation	0	0	0	0	0	0	0	0	9	0	0	0	0	0	0	0	0	0	0	0	0	0	0	0	0	0	0	0	0	0	0	0	0	0	0	0	0	0	0	0	0
261114	k__Bacteria	p__Firmicutes	c__Clostridia	o__Clostridiales	f__Lachnospiraceae	g__unclassified	s__unclassified	number.1 gg_id:00000 some annotation	0	0	0	0	0	0	0	0	50	0	0	0	0	0	0	0	0	0	0	0	0	0	0	0	0	0	0	0	0	0	0	0	0	0	0	0	0	0	0	0	0
217410	k__Bacteria	p__Proteobacteria	c__Gammaproteobacteria	o__Pseudomonadales	f__Pseudomonadaceae	g__Pseudomonas	s__unclassified	number.1 gg_id:00000 some annotation	0	0	0	0	0	0	0	0	0	0	0	0	0	0	0	0	0	0	0	0	0	0	0	0	0	0	0	0	0	0	0	0	0	102	0	0	0	0	0	0	0
190727	k__Bacteria	p__Proteobacteria	c__Gammaproteobacteria	o__Xanthomonadales	f__Xanthomonadaceae	g__Xanthomonas	s__unclassified	number.1 gg_id:00000 some annotation	0	0	0	0	0	0	0	0	1	0	0	0	0	0	0	0	0	0	0	0	0	0	0	0	0	0	0	0	1	0	0	0	0	0	0	0	0	0	0	0	0
204547	k__Bacteria	p__Bacteroidetes	c__Bacteroidia	o__Bacteroidales	f__RikenellaceaeII	g__unclassified	s__unclassified	number.1 gg_id:00000 some annotation	0	0	0	0	0	0	0	0	0	0	0	0	0	0	0	0	0	0	0	0	0	0	0	0	0	0	0	0	0	0	0	0	0	0	0	0	0	0	0	0	0
582252	k__Bacteria	p__Proteobacteria	c__Gammaproteobacteria	o__Pseudomonadales	f__Moraxellaceae	g__Acinetobacter	s__unclassified	number.1 gg_id:00000 some annotation	0	0	0	0	0	0	0	0	0	0	0	0	0	0	0	0	0	0	0	0	0	0	0	0	0	0	0	0	0	0	0	0	0	0	0	0	0	0	0	0	0
254175	k__Bacteria	p__Bacteroidetes	c__Bacteroidia	o__Bacteroidales	f__Porphyromonadaceae	g__unclassified	s__unclassified	number.1 gg_id:00000 some annotation	0	0	0	0	0	0	0	1	0	58	42	5	18	29	1	40	0	1	0	3	92	0	41	0	0	0	1	0	0	0	0	0	1	0	1	19	0	0	0	0	34
245117	k__Bacteria	p__Proteobacteria	c__Betaproteobacteria	o__Burkholderiales	f__Comamonadaceae	g__unclassified	s__unclassified	number.1 gg_id:00000 some annotation	0	0	0	0	0	0	0	0	0	0	0	0	0	0	0	0	0	0	0	0	0	0	0	0	0	0	0	0	0	0	0	0	0	0	0	0	0	0	0	0	0
362539	k__Bacteria	p__Firmicutes	c__Clostridia	o__Clostridiales	f__Lachnospiraceae	g__Clostridium	s__unclassified	number.1 gg_id:00000 some annotation	0	0	0	0	0	0	0	0	0	0	0	0	0	0	0	0	0	0	0	0	0	0	0	0	0	0	0	0	0	0	0	0	0	0	0	0	0	0	0	0	0
198513	k__Bacteria	p__Firmicutes	c__Clostridia	o__Clostridiales	f__Lachnospiraceae	g__unclassified	s__unclassified	number.1 gg_id:00000 some annotation	0	0	0	0	0	0	0	0	113	0	0	0	0	0	0	0	0	0	0	0	0	0	0	0	0	0	0	0	0	64	0	0	0	0	0	0	0	0	0	0	0
106146	k__Bacteria	p__Proteobacteria	c__Alphaproteobacteria	o__Caulobacterales	f__Caulobacteraceae	g__Caulobacter	s__unclassified	number.1 gg_id:00000 some annotation	0	0	0	0	1	0	0	0	0	0	0	0	0	0	0	0	0	0	0	0	0	0	0	0	0	0	0	0	0	0	0	0	0	0	0	0	0	0	0	0	0
149607	k__Bacteria	p__Proteobacteria	c__Gammaproteobacteria	o__Thiotrichales	f__unclassified	g__unclassified	s__unclassified	number.1 gg_id:00000 some annotation	0	0	0	0	1	0	0	0	0	0	0	0	0	0	0	0	0	0	0	0	0	0	0	0	0	0	0	0	0	0	0	0	0	0	0	0	0	0	0	0	0
304890	k__Bacteria	p__Firmicutes	c__Clostridia	o__Clostridiales	f__Lachnospiraceae	g__unclassified	s__unclassified	number.1 gg_id:00000 some annotation	0	0	0	0	0	0	0	0	0	0	0	0	0	0	0	0	0	0	0	0	0	0	0	0	0	0	0	0	0	0	0	0	0	0	0	0	0	0	0	0	0
71543	k__Bacteria	p__Proteobacteria	c__Gammaproteobacteria	o__Enterobacteriales	f__Enterobacteriaceae	g__unclassified	s__unclassified	number.1 gg_id:00000 some annotation	0	0	0	0	0	0	0	0	0	0	0	0	0	0	0	0	0	0	0	0	0	0	0	0	0	0	0	0	0	1	0	0	0	0	0	0	0	0	0	0	0
108434	k__Bacteria	p__Spirochaetes	c__Spirochaetes	o__Spirochaetales	f__Spirochaetaceae	g__Treponema	s__Treponema_denticola	number.1 gg_id:00000 some annotation	0	0	0	0	0	0	0	0	0	0	0	13	85	22	1	3	0	1	0	314	2877	0	2	0	0	0	0	1	2	0	0	1	9	0	18	112	0	0	1	1	0
109929	k__Bacteria	p__Actinobacteria	c__Actinobacteria	o__Actinomycetales	f__Actinomycetaceae	g__Actinomyces	s__unclassified	number.1 gg_id:00000 some annotation	0	0	0	0	1	0	0	0	0	3	3	0	0	9	0	0	1	0	0	0	4	26	2916	0	0	0	0	0	1	0	0	0	0	0	0	1	41	0	0	0	1
558170	k__Bacteria	p__Proteobacteria	c__Betaproteobacteria	o__Burkholderiales	f__Comamonadaceae	g__Comamonas	s__unclassified	number.1 gg_id:00000 some annotation	0	0	1	0	0	0	0	0	0	2	1	0	0	0	0	0	0	0	0	0	0	0	0	0	0	0	0	0	1	0	0	0	0	0	0	0	0	0	1	0	0
319666	k__Bacteria	p__Proteobacteria	c__Alphaproteobacteria	o__Sphingomonadales	f__Sphingomonadaceae	g__Sphingomonas	s__unclassified	number.1 gg_id:00000 some annotation	0	0	0	0	0	0	0	1	0	0	0	0	0	0	0	0	0	0	0	0	0	0	0	0	0	0	0	0	0	0	0	0	0	0	0	0	0	0	0	0	0
285655	k__Bacteria	p__Firmicutes	c__Clostridia	o__Clostridiales	f__Lachnospiraceae	g__Clostridium	s__unclassified	number.1 gg_id:00000 some annotation	0	0	0	0	0	0	0	0	1	0	0	0	0	0	0	0	0	0	0	0	0	0	0	0	0	0	0	0	0	0	0	0	0	0	0	0	0	0	0	0	0
407007	k__Bacteria	p__Firmicutes	c__Clostridia	o__Clostridiales	f__Ruminococcaceae	g__Ruminococcus	s__unclassified	number.1 gg_id:00000 some annotation	0	0	0	0	0	0	0	0	9	0	0	0	0	0	0	0	0	0	0	0	0	0	0	0	0	0	0	0	0	0	0	0	0	47	0	0	0	0	0	0	0
521607	k__Bacteria	p__Firmicutes	c__Bacilli	o__Lactobacillales	f__unclassified	g__unclassified	s__unclassified	number.1 gg_id:00000 some annotation	0	0	0	0	0	0	0	0	0	0	0	0	0	0	0	0	0	0	0	0	0	0	0	0	0	0	0	0	0	0	0	0	0	0	0	0	0	0	0	0	0
7173	k__Bacteria	p__Proteobacteria	c__Betaproteobacteria	o__Burkholderiales	f__Comamonadaceae	g__unclassified	s__unclassified	number.1 gg_id:00000 some annotation	0	0	0	0	0	0	0	0	1	0	0	0	0	0	0	0	0	0	0	0	0	0	0	0	0	0	0	0	0	0	0	0	0	0	0	0	0	0	0	0	0
87668	k__Bacteria	p__Actinobacteria	c__Actinobacteria	o__Coriobacteriales	f__Coriobacteriaceae	g__Atopobium	s__unclassified	number.1 gg_id:00000 some annotation	0	0	0	0	0	0	0	0	0	0	0	2	0	0	0	0	0	0	0	0	0	0	0	0	0	0	0	0	0	0	0	0	0	0	0	0	0	0	0	0	0
264585	k__Bacteria	p__Firmicutes	c__Clostridia	o__Clostridiales	f__Ruminococcaceae	g__unclassified	s__unclassified	number.1 gg_id:00000 some annotation	0	0	0	0	0	0	0	0	14	0	0	0	0	0	0	0	0	0	0	0	0	0	0	0	0	0	0	0	0	0	0	0	0	0	0	0	0	0	0	0	0
14594	k__Bacteria	p__Firmicutes	c__Bacilli	o__Bacillales	f__Bacillaceae	g__Bacillus	s__Bacillus_thermoamylovorans	number.1 gg_id:00000 some annotation	0	0	0	0	0	0	0	0	0	0	0	0	0	0	0	0	0	0	0	0	0	0	0	0	0	0	0	0	1	0	0	0	0	0	0	0	0	0	0	0	0
217942	k__Bacteria	p__Proteobacteria	c__Betaproteobacteria	o__Burkholderiales	f__Oxalobacteraceae	g__Janthinobacterium	s__Janthinobacterium_lividum	number.1 gg_id:00000 some annotation	0	0	0	0	0	1	0	0	5	0	0	0	0	0	0	0	0	0	0	0	0	0	0	0	0	1	0	0	0	0	0	0	0	0	0	0	0	0	0	0	0
83993	k__Bacteria	p__Bacteroidetes	c__Flavobacteria	o__Flavobacteriales	f__Flavobacteriaceae	g__Flavobacterium	s__Flavobacterium_succinicans	number.1 gg_id:00000 some annotation	0	0	0	0	0	1	5	0	17	0	1	0	0	0	0	0	0	0	0	0	0	0	0	0	0	0	0	0	0	0	0	0	0	0	0	0	0	0	0	0	0
370431	k__Bacteria	p__Actinobacteria	c__Actinobacteria	o__Actinomycetales	f__Actinomycetaceae	g__Actinomyces	s__Actinomyces_odontolyticus	number.1 gg_id:00000 some annotation	246	1257	38	180	214	9	105	536	219	124	87	275	196	75	293	161	132	5	3	2	12	1	118	151	92	563	6	0	61	0	45	3	8	85	1326	79	139	1458	61	243	549
370433	k__Bacteria	p__Firmicutes	c__Bacilli	o__Lactobacillales	f__Streptococcaceae	g__Streptococcus	s__Streptococcus_mutans	number.1 gg_id:00000 some annotation	0	0	0	0	0	1	2	0	0	0	0	23	0	19	18	0	21	0	0	0	0	0	0	0	0	0	0	0	0	0	0	0	0	0	0	0	0	0	0	0	0
360574	k__Bacteria	p__Firmicutes	c__Clostridia	o__Clostridiales	f__Veillonellaceae	g__Selenomonas	s__unclassified	number.1 gg_id:00000 some annotation	0	0	0	0	0	0	0	0	0	1	3	2	8	0	0	0	0	0	0	5	0	0	56	0	0	0	0	0	0	0	0	0	0	0	1	0	3	0	0	0	0
353985	k__Bacteria	p__Bacteroidetes	c__Bacteroidia	o__Bacteroidales	f__Porphyromonadaceae	g__Parabacteroides	s__Parabacteroides_distasonis	number.1 gg_id:00000 some annotation	0	0	0	0	0	0	0	0	5	0	0	0	0	0	0	0	0	0	0	0	0	0	0	1	0	0	0	0	0	321	0	0	0	0	0	0	0	0	0	0	1
342757	k__Bacteria	p__Proteobacteria	c__Betaproteobacteria	o__Burkholderiales	f__Methylibiaceae	g__Methylibium	s__unclassified	number.1 gg_id:00000 some annotation	0	0	0	0	2	0	0	0	0	0	0	0	0	0	0	0	0	0	0	0	0	0	0	0	0	0	0	0	0	0	0	0	0	0	0	0	0	0	0	0	0
319794	k__Bacteria	p__Bacteroidetes	c__Bacteroidia	o__Bacteroidales	f__RikenellaceaeII	g__unclassified	s__unclassified	number.1 gg_id:00000 some annotation	0	0	0	0	0	0	0	1	248	0	0	0	0	0	0	0	0	0	0	0	0	208	0	0	0	0	0	0	0	127	0	0	0	231	0	0	0	0	0	0	0
184106	k__Bacteria	p__Proteobacteria	c__Betaproteobacteria	o__Burkholderiales	f__unclassified	g__unclassified	s__unclassified	number.1 gg_id:00000 some annotation	0	0	0	0	0	0	0	0	0	0	0	0	1	3	0	0	0	0	0	0	0	67	0	0	0	0	0	0	1	0	0	0	0	0	0	1	0	0	0	0	1
73450	k__Bacteria	p__Firmicutes	c__Clostridia	o__Clostridiales	f__Lachnospiraceae	g__unclassified	s__unclassified	number.1 gg_id:00000 some annotation	0	0	0	0	6	0	3	0	1	0	0	0	9	4	0	2	0	6	0	2	0	296	25	116	1	0	40	1	0	0	0	4	1	0	4	0	139	44	0	0	12
218720	k__Bacteria	p__Proteobacteria	c__Gammaproteobacteria	o__Enterobacteriales	f__Enterobacteriaceae	g__unclassified	s__unclassified	number.1 gg_id:00000 some annotation	0	0	0	0	0	0	0	0	0	0	0	0	0	0	0	0	0	0	0	0	0	0	0	0	0	0	0	0	27	0	0	0	0	0	0	0	0	0	0	0	0
72820	k__Bacteria	p__Actinobacteria	c__Actinobacteria	o__Bifidobacteriales	f__Bifidobacteriaceae	g__Bifidobacterium	s__unclassified	number.1 gg_id:00000 some annotation	0	0	0	0	0	0	0	0	0	0	0	8	0	1	0	2	0	0	3	0	0	298	0	0	0	1054	0	0	0	0	0	0	0	0	0	0	0	0	0	0	0
114946	k__Bacteria	p__Bacteroidetes	c__Bacteroidia	o__Bacteroidales	f__Prevotellaceae	g__Prevotella	s__Prevotella_nanceiensis	number.1 gg_id:00000 some annotation	71	1	10	339	16	5	107	205	108	18	6	0	47	1	0	281	89	2823	0	2	36	0	0	1	0	0	1	0	169	1	123	814	26	0	1418	27	1	0	0	0	211
272879	k__Bacteria	p__Firmicutes	c__Clostridia	o__Clostridiales	f__Lachnospiraceae	g__unclassified	s__unclassified	number.1 gg_id:00000 some annotation	0	0	0	0	0	0	0	0	69	0	0	0	0	0	1	0	0	0	0	0	0	0	0	0	0	0	0	0	0	60	0	0	0	205	0	0	0	0	0	0	0
464073	k__Bacteria	p__Bacteroidetes	c__Flavobacteria	o__Flavobacteriales	f__Flavobacteriaceae	g__Chryseobacterium	s__unclassified	number.1 gg_id:00000 some annotation	0	1	0	0	0	1	0	0	1	0	0	0	0	0	0	0	0	0	0	0	0	0	0	0	0	0	0	0	0	0	0	0	0	0	0	0	0	0	0	0	0
572109	k__Bacteria	p__Firmicutes	c__Clostridia	o__Clostridiales	f__Lachnospiraceae	g__Blautia	s__unclassified	number.1 gg_id:00000 some annotation	0	0	0	0	0	0	0	0	0	0	0	0	0	0	0	0	0	0	0	0	0	0	0	0	0	0	0	0	0	0	0	0	0	0	0	0	0	0	0	0	0
185187	k__Bacteria	p__Bacteroidetes	c__Bacteroidia	o__Bacteroidales	f__RikenellaceaeII	g__unclassified	s__unclassified	number.1 gg_id:00000 some annotation	0	0	0	0	0	0	0	0	0	0	0	0	0	0	0	0	1	0	0	0	0	0	0	0	0	0	0	0	0	0	0	0	0	0	0	0	0	0	0	0	0
232941	k__Bacteria	p__Bacteroidetes	c__Bacteroidia	o__Bacteroidales	f__Rikenellaceae	g__Alistipes	s__unclassified	number.1 gg_id:00000 some annotation	0	0	0	0	0	0	2	1	357	0	1	0	0	0	0	0	0	0	0	0	0	134	0	0	0	0	0	0	0	63	0	0	0	85	1	0	0	1	0	0	0
221384	k__Bacteria	p__Proteobacteria	c__Betaproteobacteria	o__Neisseriales	f__Neisseriaceae	g__Neisseria	s__unclassified	number.1 gg_id:00000 some annotation	0	30	0	0	0	0	1	0	0	0	0	0	30	0	0	2	0	1	0	0	2	86	27	0	0	0	0	0	5	0	0	0	1	3	0	3	23	0	1	0	6
181878	k__Bacteria	p__Proteobacteria	c__Betaproteobacteria	o__Burkholderiales	f__Comamonadaceae	g__unclassified	s__unclassified	number.1 gg_id:00000 some annotation	0	0	2	0	2	0	1	0	12	0	0	0	0	0	0	0	0	0	0	0	0	0	0	0	0	0	0	0	1	0	0	0	0	0	0	0	0	0	0	0	0
15368	k__Bacteria	p__Firmicutes	c__Bacilli	o__Lactobacillales	f__Streptococcaceae	g__Streptococcus	s__unclassified	number.1 gg_id:00000 some annotation	0	0	0	0	0	0	0	0	0	0	0	0	0	0	1	0	0	0	0	0	0	0	0	0	0	0	0	0	0	0	0	0	0	0	0	0	0	0	0	0	0
335057	k__Bacteria	p__Firmicutes	c__Clostridia	o__Clostridiales	f__Lachnospiraceae	g__unclassified	s__unclassified	number.1 gg_id:00000 some annotation	0	0	0	0	0	0	0	0	0	0	0	0	0	0	0	0	0	0	0	0	0	0	0	0	0	0	0	0	0	1	0	0	0	0	0	0	0	0	0	0	0
177425	k__Bacteria	p__Bacteroidetes	c__Bacteroidia	o__Bacteroidales	f__RikenellaceaeII	g__unclassified	s__unclassified	number.1 gg_id:00000 some annotation	0	0	0	0	0	0	0	0	0	0	0	0	0	0	0	0	0	0	0	0	0	0	0	0	0	0	0	0	0	0	0	0	0	0	0	0	0	0	0	0	0
6473	k__Bacteria	p__Proteobacteria	c__Betaproteobacteria	o__Neisseriales	f__Neisseriaceae	g__unclassified	s__unclassified	number.1 gg_id:00000 some annotation	0	7	1	33	33	1	16	6	35	64	27	1	0	0	1	0	1	2	0	0	1353	190	21	1	929	0	44	1	501	0	2	1	3	310	6	53	462	1	0	33	98
525035	k__Bacteria	p__WPS-2	c__unclassified	o__unclassified	f__unclassified	g__unclassified	s__unclassified	number.1 gg_id:00000 some annotation	0	0	0	0	0	0	0	0	0	0	0	0	0	0	0	0	0	0	0	0	0	0	0	0	0	0	0	0	0	0	0	0	0	0	0	0	0	0	0	0	0
79234	k__Bacteria	p__Actinobacteria	c__Actinobacteria	o__Actinomycetales	f__Actinomycetaceae	g__Actinomyces	s__unclassified	number.1 gg_id:00000 some annotation	27	3	1	1	10	0	5	1	1	18	10	0	28	38	1	17	0	0	1	0	3	0	2	26	105	3344	0	0	0	0	0	0	0	0	113	2	0	412	0	14	49
526211	k__Bacteria	p__Firmicutes	c__Bacilli	o__Lactobacillales	f__Carnobacteriaceae	g__unclassified	s__unclassified	number.1 gg_id:00000 some annotation	0	0	0	0	0	0	0	0	0	0	0	0	0	0	0	0	0	0	0	0	0	0	0	0	0	0	0	0	0	0	0	0	0	0	0	0	0	0	0	0	0
248516	k__Bacteria	p__Spirochaetes	c__Spirochaetes	o__Spirochaetales	f__Spirochaetaceae	g__Treponema	s__unclassified	number.1 gg_id:00000 some annotation	0	0	0	0	0	1	1	0	0	0	0	2	0	11	0	0	0	0	0	1220	773	228	5	0	1	0	0	0	0	0	0	0	0	1	25	11	0	0	0	0	0
358127	k__Bacteria	p__Actinobacteria	c__Actinobacteria	o__Actinomycetales	f__Corynebacteriaceae	g__Corynebacterium	s__unclassified	number.1 gg_id:00000 some annotation	0	0	0	0	0	0	0	0	0	0	0	0	0	1	0	0	0	0	0	0	0	0	0	0	0	0	0	0	0	0	0	0	0	0	0	0	0	0	0	0	0
3931	k__Bacteria	p__Spirochaetes	c__Spirochaetes	o__Spirochaetales	f__Spirochaetaceae	g__Treponema	s__Treponema_medium	number.1 gg_id:00000 some annotation	0	0	0	0	0	0	0	0	0	0	0	0	0	0	0	0	0	0	0	7	0	0	5	0	0	0	0	0	0	0	0	0	0	0	8	0	0	0	0	0	0
87984	k__Bacteria	p__Proteobacteria	c__Alphaproteobacteria	o__Rhizobiales	f__Bradyrhizobiaceae	g__unclassified	s__unclassified	number.1 gg_id:00000 some annotation	0	0	0	0	0	0	0	0	0	0	0	0	0	0	0	0	0	0	0	0	0	0	0	0	0	0	0	0	0	0	0	0	0	0	0	0	0	0	0	0	0
263856	k__Bacteria	p__Proteobacteria	c__Gammaproteobacteria	o__Pseudomonadales	f__Pseudomonadaceae	g__Pseudomonas	s__unclassified	number.1 gg_id:00000 some annotation	0	0	0	0	0	0	0	0	0	0	0	0	0	0	0	0	0	0	0	0	0	0	0	0	0	0	0	0	0	0	0	0	0	2	0	0	0	0	0	0	0
410855	k__Bacteria	p__Proteobacteria	c__Alphaproteobacteria	o__Rhizobiales	f__unclassified	g__unclassified	s__unclassified	number.1 gg_id:00000 some annotation	0	0	1	0	0	0	0	0	0	0	0	0	0	0	0	0	0	0	0	0	0	0	0	0	0	0	0	0	0	0	0	0	0	0	0	0	0	0	0	0	0
312665	k__Bacteria	p__Firmicutes	c__Clostridia	o__Clostridiales	f__Ruminococcaceae	g__Ruminococcus	s__unclassified	number.1 gg_id:00000 some annotation	0	0	0	0	0	0	0	0	34	0	0	0	0	0	0	0	0	0	0	0	0	0	0	1	0	0	0	0	0	0	0	0	0	0	0	0	0	0	0	0	0
12533	k__Bacteria	p__Actinobacteria	c__Actinobacteria	o__Actinomycetales	f__Dermabacteraceae	g__Dermabacter	s__Dermabacter_hominis	number.1 gg_id:00000 some annotation	0	0	0	0	0	0	0	0	0	0	0	0	0	1	0	0	1	0	0	0	0	0	0	0	0	0	0	0	0	0	0	0	0	0	0	0	0	0	0	0	0
422952	k__Bacteria	p__Firmicutes	c__Bacilli	o__unclassified	f__unclassified	g__unclassified	s__unclassified	number.1 gg_id:00000 some annotation	0	0	0	0	0	0	0	0	0	0	0	0	0	0	0	0	0	0	0	0	0	0	0	0	0	0	0	0	0	0	0	0	0	0	0	0	0	0	0	0	0
173398	k__Bacteria	p__Proteobacteria	c__Gammaproteobacteria	o__Legionellales	f__Legionellaceae	g__Legionella	s__unclassified	number.1 gg_id:00000 some annotation	0	0	0	0	2	0	0	0	0	0	0	0	0	0	0	0	0	0	0	0	0	0	0	0	0	0	0	0	0	0	0	0	0	0	0	0	0	0	0	0	0
529857	k__Bacteria	p__Fusobacteria	c__Fusobacteria	o__Fusobacteriales	f__Fusobacteriaceae	g__Leptotrichia	s__unclassified	number.1 gg_id:00000 some annotation	0	0	0	4	31	0	0	0	0	0	0	0	0	13	4	334	1	1	1	2	0	282	972	0	0	0	0	13	0	0	0	1071	42	0	0	0	765	0	0	0	5
428237	k__Bacteria	p__Bacteroidetes	c__Flavobacteria	o__Flavobacteriales	f__Flavobacteriaceae	g__Capnocytophaga	s__unclassified	number.1 gg_id:00000 some annotation	0	0	5	0	2	0	20	11	0	3	2	1	24	15	11	42	0	3	5	1	1	10	45	1	72	1	81	5	0	0	35	2	5	0	2	0	843	52	0	0	532
312461	k__Bacteria	p__Firmicutes	c__Clostridia	o__Clostridiales	f__unclassified	g__unclassified	s__unclassified	number.1 gg_id:00000 some annotation	0	0	0	0	0	0	0	0	0	0	0	0	0	0	0	0	0	0	0	0	0	0	0	0	0	0	0	0	2	0	0	0	0	0	0	0	0	0	0	0	0
224539	k__Bacteria	p__Bacteroidetes	c__Bacteroidia	o__Bacteroidales	f__Prevotellaceae	g__Prevotella	s__unclassified	number.1 gg_id:00000 some annotation	0	0	0	0	0	0	1	0	1	0	0	4	6	49	1	14	0	0	31	4	82	0	100	0	0	0	1	0	0	0	0	0	2	0	2	6	14	0	0	0	5
130977	k__Bacteria	p__Bacteroidetes	c__Sphingobacteria	o__Sphingobacteriales	f__Flexibacteraceae	g__Flectobacillus	s__unclassified	number.1 gg_id:00000 some annotation	0	0	0	0	0	0	1	0	0	0	0	0	0	0	0	0	0	0	0	0	0	0	0	0	0	0	0	0	0	0	0	0	0	0	0	0	0	0	0	0	0
240315	k__Bacteria	p__Firmicutes	c__Bacilli	o__Bacillales	f__Bacillaceae	g__Bacillus	s__unclassified	number.1 gg_id:00000 some annotation	0	0	0	0	0	0	1	0	0	0	0	0	0	0	0	0	0	0	0	0	0	0	0	0	0	0	0	0	0	0	0	0	0	0	0	0	0	0	0	0	0
214126	k__Bacteria	p__Proteobacteria	c__Alphaproteobacteria	o__Rhizobiales	f__Rhizobiaceae	g__Agrobacterium	s__Rhizobium_sp._IRBG_74	number.1 gg_id:00000 some annotation	0	0	0	0	0	0	0	1	0	0	0	0	0	0	0	0	0	0	0	0	0	0	0	0	0	0	0	0	0	0	0	0	0	0	0	0	0	0	0	0	0
313823	k__Bacteria	p__Firmicutes	c__Clostridia	o__Clostridiales	f__Lachnospiraceae	g__Coprococcus	s__unclassified	number.1 gg_id:00000 some annotation	0	0	0	0	0	0	0	0	0	0	0	0	0	0	0	0	0	0	0	0	0	0	0	0	0	0	0	0	0	1	0	0	0	1	0	0	0	0	0	0	0
255954	k__Bacteria	p__Proteobacteria	c__Betaproteobacteria	o__Burkholderiales	f__Comamonadaceae	g__unclassified	s__unclassified	number.1 gg_id:00000 some annotation	0	0	0	0	0	0	0	0	0	0	0	0	0	0	0	0	0	0	0	0	0	0	0	0	0	0	0	0	0	0	0	0	0	0	0	0	0	0	0	0	0
100099	k__Bacteria	p__Proteobacteria	c__Betaproteobacteria	o__Burkholderiales	f__Comamonadaceae	g__unclassified	s__unclassified	number.1 gg_id:00000 some annotation	0	0	1	0	0	0	0	0	0	0	0	0	0	0	0	0	0	0	0	0	0	0	0	0	0	0	0	0	0	0	0	0	0	0	0	0	0	0	0	0	0
177772	k__Bacteria	p__Firmicutes	c__Clostridia	o__Clostridiales	f__Lachnospiraceae	g__Roseburia	s__unclassified	number.1 gg_id:00000 some annotation	0	0	0	0	0	0	0	0	0	0	0	0	0	0	0	0	0	0	0	0	0	137	0	0	0	0	0	0	0	0	0	0	0	0	0	0	0	0	0	0	0
260346	k__Bacteria	p__Firmicutes	c__Clostridia	o__Clostridiales	f__Lachnospiraceae	g__unclassified	s__unclassified	number.1 gg_id:00000 some annotation	0	0	0	0	0	0	0	0	11	0	0	0	0	0	0	0	0	0	0	0	0	0	0	0	0	0	0	0	0	0	0	0	0	0	0	0	0	0	0	0	0
104555	k__Bacteria	p__Proteobacteria	c__Betaproteobacteria	o__Methylophilales	f__Methylophilaceae	g__Methylotenera	s__unclassified	number.1 gg_id:00000 some annotation	0	0	0	0	0	0	0	0	0	0	0	0	0	0	0	0	0	0	0	0	0	0	0	0	0	0	0	0	0	0	0	0	0	0	0	0	0	0	0	0	0
195445	k__Bacteria	p__Firmicutes	c__Clostridia	o__Clostridiales	f__Lachnospiraceae	g__unclassified	s__unclassified	number.1 gg_id:00000 some annotation	0	0	0	0	0	0	0	0	0	0	0	0	0	0	0	0	0	0	0	0	0	0	0	0	0	0	0	0	0	0	0	0	0	0	0	0	0	0	0	0	0
167598	k__Bacteria	p__Bacteroidetes	c__Sphingobacteria	o__Sphingobacteriales	f__Flexibacteraceae	g__unclassified	s__unclassified	number.1 gg_id:00000 some annotation	0	0	0	0	0	0	0	0	0	0	0	0	0	0	0	0	0	0	0	0	0	0	0	0	0	0	0	0	0	0	0	0	0	0	0	0	0	0	0	0	0
13430	k__Bacteria	p__Actinobacteria	c__Actinobacteria	o__Actinomycetales	f__Corynebacteriaceae	g__Corynebacterium	s__unclassified	number.1 gg_id:00000 some annotation	0	0	0	0	0	0	0	0	0	1	0	0	0	5	0	0	0	0	0	0	0	33	0	0	0	0	0	0	0	0	0	0	0	0	0	0	0	0	0	0	0
261294	k__Bacteria	p__Proteobacteria	c__Alphaproteobacteria	o__Sphingomonadales	f__Sphingomonadaceae	g__unclassified	s__unclassified	number.1 gg_id:00000 some annotation	0	0	0	0	1	0	0	0	0	0	0	0	0	0	0	0	0	0	0	0	0	0	0	0	0	1	0	0	0	0	0	0	0	0	0	0	0	0	0	0	0
348863	k__Bacteria	p__Firmicutes	c__Clostridia	o__Clostridiales	f__Lachnospiraceae	g__unclassified	s__unclassified	number.1 gg_id:00000 some annotation	0	0	0	0	0	0	0	0	0	0	0	0	0	0	0	0	0	0	0	0	0	0	0	0	0	0	0	0	0	1	0	0	0	0	0	0	0	0	0	0	0
328486	k__Bacteria	p__Firmicutes	c__Clostridia	o__Clostridiales	f__Lachnospiraceae	g__unclassified	s__unclassified	number.1 gg_id:00000 some annotation	0	0	0	0	0	0	0	0	1	0	0	0	0	0	1	0	0	0	0	0	0	0	0	0	0	0	0	0	0	69	0	0	0	0	0	0	0	0	0	0	0
383246	k__Bacteria	p__Firmicutes	c__Clostridia	o__Clostridiales	f__Clostridiales_Family_XIII._Incertae_Sedis	g__Eubacterium	s__unclassified	number.1 gg_id:00000 some annotation	0	0	0	0	0	0	0	0	0	0	0	0	0	0	0	0	0	0	0	0	0	0	0	0	0	0	0	0	0	0	0	0	0	0	0	0	0	0	0	0	0
114612	k__Bacteria	p__Proteobacteria	c__Betaproteobacteria	o__Methylophilales	f__Methylophilaceae	g__Methylotenera	s__unclassified	number.1 gg_id:00000 some annotation	0	0	0	0	0	1	0	0	6	0	0	0	0	0	0	0	0	0	0	0	0	0	0	0	0	0	0	0	0	0	0	0	0	0	0	0	0	0	0	0	0
172603	k__Bacteria	p__Firmicutes	c__Clostridia	o__Clostridiales	f__Lachnospiraceae	g__Coprococcus	s__unclassified	number.1 gg_id:00000 some annotation	0	0	1	0	0	0	0	0	0	0	0	0	0	0	0	0	0	0	0	0	0	0	0	0	0	0	0	0	0	0	0	0	0	0	0	0	0	0	0	0	0
46393	k__Bacteria	p__Proteobacteria	c__Gammaproteobacteria	o__Oceanospirillales	f__Alteromonadaceae	g__Cellvibrio	s__unclassified	number.1 gg_id:00000 some annotation	0	0	0	0	0	0	0	0	0	0	0	0	0	0	0	0	0	0	0	0	0	0	0	0	0	0	0	0	0	0	0	0	0	0	0	0	0	0	0	0	0
46159	k__Bacteria	p__Firmicutes	c__Clostridia	o__Clostridiales	f__Clostridiales_Family_XIII._Incertae_Sedis	g__Mogibacterium	s__unclassified	number.1 gg_id:00000 some annotation	3	0	0	0	0	0	3	0	0	13	2	1	0	8	0	32	0	0	0	1	0	0	0	31	10	20	1	0	0	0	0	0	3	0	14	0	1	122	1	0	44
69669	k__Bacteria	p__Actinobacteria	c__Actinobacteria	o__Actinomycetales	f__Corynebacteriaceae	g__Corynebacterium	s__Corynebacterium_kroppenstedtii	number.1 gg_id:00000 some annotation	0	0	0	0	0	0	0	0	0	0	0	0	0	0	0	0	0	0	0	0	0	0	0	0	0	0	0	0	0	0	0	0	0	9	0	0	0	0	0	0	1
69664	k__Bacteria	p__unclassified	c__unclassified	o__unclassified	f__unclassified	g__unclassified	s__unclassified	number.1 gg_id:00000 some annotation	0	0	0	0	0	0	0	0	0	0	0	0	0	0	0	0	0	0	0	0	0	0	0	0	0	0	0	0	0	0	0	0	0	0	0	0	0	0	0	0	7
2375	k__Bacteria	p__Bacteroidetes	c__Flavobacteria	o__Flavobacteriales	f__Flavobacteriaceae	g__Capnocytophaga	s__unclassified	number.1 gg_id:00000 some annotation	0	0	0	0	0	0	0	0	0	0	0	0	0	2	0	0	0	0	0	0	0	0	0	0	0	0	0	0	0	0	0	0	0	0	1	0	1	0	0	0	0
2370	k__Bacteria	p__Bacteroidetes	c__Flavobacteria	o__Flavobacteriales	f__Flavobacteriaceae	g__Capnocytophaga	s__unclassified	number.1 gg_id:00000 some annotation	0	0	0	0	0	0	0	0	0	0	0	0	0	8	0	0	0	0	0	0	0	0	1	0	0	0	0	0	0	0	0	0	0	0	0	0	5	0	0	0	0
205559	k__Bacteria	p__Actinobacteria	c__Actinobacteria	o__Actinomycetales	f__Microbacteriaceae	g__unclassified	s__unclassified	number.1 gg_id:00000 some annotation	0	0	0	0	0	0	0	0	0	0	0	0	0	0	0	0	0	0	0	0	0	0	0	0	0	0	0	0	0	0	0	0	0	0	0	0	0	0	0	0	0
426108	k__Bacteria	p__Bacteroidetes	c__Flavobacteria	o__Flavobacteriales	f__Flavobacteriaceae	g__Flavobacterium	s__unclassified	number.1 gg_id:00000 some annotation	0	0	0	0	0	0	0	0	0	0	0	0	0	0	0	0	0	0	0	0	0	0	0	0	0	0	0	0	0	0	0	0	0	0	0	0	0	0	0	0	0
501319	k__Bacteria	p__Bacteroidetes	c__Flavobacteria	o__Flavobacteriales	f__Flavobacteriaceae	g__Capnocytophaga	s__unclassified	number.1 gg_id:00000 some annotation	0	0	0	0	0	0	0	0	0	2	2	0	0	0	0	0	0	0	0	0	0	0	1	0	0	0	119	0	0	0	0	0	0	0	0	0	2	0	0	0	274
144759	k__Bacteria	p__Proteobacteria	c__Betaproteobacteria	o__Burkholderiales	f__unclassified	g__unclassified	s__unclassified	number.1 gg_id:00000 some annotation	0	0	0	0	0	0	0	0	0	0	0	0	0	0	0	0	0	0	0	0	0	1	0	0	0	0	0	0	0	0	0	0	0	0	0	0	0	0	0	0	0
269418	k__Bacteria	p__Firmicutes	c__Clostridia	o__Clostridiales	f__Ruminococcaceae	g__unclassified	s__unclassified	number.1 gg_id:00000 some annotation	0	0	0	0	0	0	0	0	19	0	0	0	0	0	0	0	0	0	0	0	0	0	0	0	0	0	0	0	0	150	0	0	0	0	0	0	0	0	0	0	0
73875	k__Bacteria	p__Spirochaetes	c__Spirochaetes	o__Spirochaetales	f__Spirochaetaceae	g__Treponema	s__unclassified	number.1 gg_id:00000 some annotation	0	0	0	0	0	0	0	0	0	0	0	0	0	0	0	0	0	0	0	0	0	0	0	0	0	0	0	0	0	0	3	0	0	0	0	0	0	0	0	0	0
300187	k__Bacteria	p__Actinobacteria	c__Actinobacteria	o__Actinomycetales	f__Mycobacteriaceae	g__Mycobacterium	s__unclassified	number.1 gg_id:00000 some annotation	0	0	0	0	0	0	0	0	0	0	0	0	0	0	0	0	0	0	0	0	0	0	0	0	0	0	0	0	0	42	0	0	0	0	0	0	0	0	0	0	0
109807	k__Bacteria	p__Tenericutes	c__Erysipelotrichi	o__Erysipelotrichales	f__Erysipelotrichaceae	g__MLG480	s__MLG480	number.1 gg_id:00000 some annotation	0	0	0	0	0	0	0	0	0	0	0	0	0	0	0	0	0	0	0	0	0	0	0	0	0	0	0	0	0	0	0	0	0	0	0	0	0	0	0	0	0
128216	k__Bacteria	p__Actinobacteria	c__Actinobacteria	o__Acidimicrobiales	f__Iamiaceae	g__unclassified	s__unclassified	number.1 gg_id:00000 some annotation	0	0	0	0	0	0	0	0	0	0	0	0	0	0	0	0	0	0	0	0	0	6	0	0	0	0	0	0	0	0	0	0	0	0	0	0	0	0	0	0	0
184685	k__Bacteria	p__Bacteroidetes	c__Sphingobacteria	o__Sphingobacteriales	f__Saprospiraceae	g__Haliscomenobacter	s__unclassified	number.1 gg_id:00000 some annotation	0	0	0	0	0	0	0	0	0	0	0	0	0	0	0	0	0	0	0	0	0	0	0	0	0	0	0	0	0	0	0	0	0	0	0	0	0	0	0	0	0
42721	k__Bacteria	p__Firmicutes	c__Clostridia	o__Clostridiales	f__Veillonellaceae	g__unclassified	s__unclassified	number.1 gg_id:00000 some annotation	0	0	0	0	0	0	0	0	0	0	0	7	0	0	0	0	0	0	0	2	0	0	0	0	0	0	0	0	0	0	0	0	0	0	27	0	0	0	0	0	12
104793	k__Bacteria	p__Proteobacteria	c__Betaproteobacteria	o__Burkholderiales	f__Alcaligenaceae	g__Sutterella	s__unclassified	number.1 gg_id:00000 some annotation	0	0	0	0	0	0	0	0	0	0	0	0	0	0	0	0	0	0	0	0	0	329	3	0	0	0	0	0	0	80	0	0	0	87	0	0	0	0	0	0	1
152423	k__Bacteria	p__Proteobacteria	c__Gammaproteobacteria	o__Pseudomonadales	f__Pseudomonadaceae	g__Pseudomonas	s__unclassified	number.1 gg_id:00000 some annotation	0	0	0	0	0	0	0	0	0	0	0	0	0	0	0	0	0	0	0	0	0	0	0	0	0	0	0	0	0	0	0	0	0	1	0	0	0	0	0	0	0
329045	k__Bacteria	p__Actinobacteria	c__Actinobacteria	o__Actinomycetales	f__Intrasporangiaceae	g__unclassified	s__unclassified	number.1 gg_id:00000 some annotation	0	0	0	0	0	0	0	0	0	0	0	0	0	0	0	0	0	0	0	0	0	0	0	0	0	0	0	0	0	0	0	0	0	1	0	0	0	0	0	0	0
203788	k__Bacteria	p__Firmicutes	c__Clostridia	o__Clostridiales	f__Ruminococcaceae	g__Clostridium	s__unclassified	number.1 gg_id:00000 some annotation	0	0	0	0	0	0	0	0	0	0	0	0	0	0	0	0	0	0	0	0	0	0	0	0	0	0	0	0	0	0	0	0	0	0	0	0	0	0	0	0	0
294639	k__Bacteria	p__Bacteroidetes	c__Bacteroidia	o__Bacteroidales	f__Bacteroidaceae	g__Bacteroides	s__unclassified	number.1 gg_id:00000 some annotation	0	0	0	0	0	0	0	0	139	0	0	1	0	0	2	0	0	0	0	0	0	3	0	0	0	0	0	0	0	259	0	0	0	408	0	0	0	0	0	0	0
158660	k__Bacteria	p__Bacteroidetes	c__Bacteroidia	o__Bacteroidales	f__Bacteroidaceae	g__Bacteroides	s__Bacteroides_ovatus	number.1 gg_id:00000 some annotation	0	0	0	0	0	0	0	0	37	0	0	0	0	0	0	0	1	2	1	0	0	416	3	0	1	0	0	0	0	458	0	0	0	2	0	0	0	0	0	0	1
436019	k__Bacteria	p__Firmicutes	c__Clostridia	o__Clostridiales	f__Lachnospiraceae	g__unclassified	s__unclassified	number.1 gg_id:00000 some annotation	0	0	0	0	0	0	0	0	43	0	0	0	0	0	0	0	0	0	0	0	0	0	0	0	0	0	0	0	1	0	0	0	0	0	0	0	0	0	0	0	0
566658	k__Bacteria	p__Fusobacteria	c__Fusobacteria	o__Fusobacteriales	f__Fusobacteriaceae	g__Leptotrichia	s__unclassified	number.1 gg_id:00000 some annotation	0	0	0	0	0	0	0	0	0	28	0	0	9	0	0	0	0	0	0	0	0	0	0	0	0	0	13	0	0	0	0	1	0	0	0	0	0	0	36	0	2
192536	k__Bacteria	p__Firmicutes	c__Clostridia	o__Clostridiales	f__Lachnospiraceae	g__Eubacterium	s__unclassified	number.1 gg_id:00000 some annotation	0	0	0	0	0	0	0	0	0	0	0	0	0	0	0	0	0	0	0	0	0	0	0	0	0	0	0	0	0	0	0	0	0	0	0	0	1	0	0	0	0
235856	k__Bacteria	p__Proteobacteria	c__Alphaproteobacteria	o__Sphingomonadales	f__Sphingomonadaceae	g__Sphingomonas	s__unclassified	number.1 gg_id:00000 some annotation	0	0	0	0	0	0	0	1	0	0	0	0	0	0	0	0	0	0	0	0	0	109	0	0	0	0	0	0	0	0	0	0	0	0	0	0	0	0	0	0	1
236633	k__Bacteria	p__Proteobacteria	c__Betaproteobacteria	o__Burkholderiales	f__unclassified	g__unclassified	s__unclassified	number.1 gg_id:00000 some annotation	0	0	0	0	1	0	0	0	0	1	0	0	0	0	0	0	0	0	0	0	0	1	0	0	0	0	0	0	0	0	0	0	0	0	0	0	0	0	0	0	0
134476	k__Bacteria	p__Proteobacteria	c__Betaproteobacteria	o__Rhodocyclales	f__Rhodocyclaceae	g__Rhodocyclus	s__Rhodocyclus_tenuis	number.1 gg_id:00000 some annotation	0	0	0	0	0	0	0	0	0	0	0	0	0	0	0	0	0	0	0	0	0	0	0	0	0	0	0	1	0	0	0	0	0	0	0	0	0	0	0	0	0
470139	k__Bacteria	p__Tenericutes	c__Erysipelotrichi	o__Erysipelotrichales	f__Erysipelotrichaceae	g__Clostridium	s__unclassified	number.1 gg_id:00000 some annotation	0	0	0	0	0	0	0	0	0	0	0	0	2	0	0	0	0	0	0	0	0	0	0	0	0	0	0	0	0	0	0	0	0	0	0	0	0	0	0	0	0
516119	k__Bacteria	p__Firmicutes	c__Clostridia	o__Clostridiales	f__Veillonellaceae	g__Veillonella	s__unclassified	number.1 gg_id:00000 some annotation	4	217	0	2	7	3	0	0	1	19	19	37	1	67	590	2	186	2	0	0	0	0	71	0	1	0	0	339	65	0	0	0	0	0	0	0	21	0	58	0	0
285937	k__Bacteria	p__Proteobacteria	c__Gammaproteobacteria	o__Pseudomonadales	f__Moraxellaceae	g__Acinetobacter	s__unclassified	number.1 gg_id:00000 some annotation	0	0	0	0	0	0	0	0	0	0	2	0	0	0	0	0	0	0	0	0	0	0	0	0	0	0	0	0	0	0	0	0	0	0	0	0	0	0	0	0	0
552928	k__Bacteria	p__Firmicutes	c__Clostridia	o__Clostridiales	f__Catabacteriaceae	g__unclassified	s__unclassified	number.1 gg_id:00000 some annotation	0	0	0	0	0	0	0	0	0	0	0	1	0	8	0	0	0	0	0	159	68	0	0	0	0	0	0	0	0	0	0	0	0	0	3	2	0	0	0	0	0
14156	k__Bacteria	p__Firmicutes	c__Clostridia	o__Clostridiales	f__Clostridiales_Family_XIII._Incertae_Sedis	g__Eubacterium	s__unclassified	number.1 gg_id:00000 some annotation	0	0	0	0	0	0	0	0	0	0	0	0	0	6	0	0	0	0	0	1	0	0	0	0	0	0	1	0	1	0	0	0	0	0	3	0	0	0	0	0	8
14157	k__Bacteria	p__Firmicutes	c__Clostridia	o__Clostridiales	f__unclassified	g__unclassified	s__unclassified	number.1 gg_id:00000 some annotation	0	0	0	0	0	0	5	0	0	0	3	0	17	12	0	0	0	0	0	0	0	0	0	0	3	0	0	0	0	0	0	0	0	0	1	0	0	0	0	0	0
38733	k__Bacteria	p__Cyanobacteria	c__Chloroplast	o__Stramenopiles	f__unclassified	g__unclassified	s__unclassified	number.1 gg_id:00000 some annotation	0	0	0	0	1	0	0	0	0	0	0	0	0	0	0	0	0	0	0	0	0	0	0	0	0	0	0	0	0	0	0	0	0	0	0	0	0	0	0	0	0
564431	k__Bacteria	p__Proteobacteria	c__Gammaproteobacteria	o__Enterobacteriales	f__Enterobacteriaceae	g__unclassified	s__unclassified	number.1 gg_id:00000 some annotation	0	0	0	0	0	0	0	0	0	0	0	0	0	0	0	0	0	0	0	0	0	0	0	0	0	0	0	0	0	0	0	0	0	0	0	0	0	0	0	0	0
583523	k__Bacteria	p__Actinobacteria	c__Actinobacteria	o__Actinomycetales	f__Actinomycetaceae	g__Actinomyces	s__unclassified	number.1 gg_id:00000 some annotation	0	0	0	0	0	0	1	1	0	0	5	1	1	0	1	1	1	0	0	0	0	0	20	0	0	0	0	0	1	0	1	0	0	0	0	1	1	0	3	0	0
570301	k__Bacteria	p__Proteobacteria	c__Betaproteobacteria	o__Burkholderiales	f__Burkholderiaceae	g__Polynucleobacter	s__Polynucleobacter_cosmopolitanus	number.1 gg_id:00000 some annotation	0	0	0	0	2	0	0	0	0	0	0	0	0	0	0	0	0	0	0	0	0	0	0	0	0	0	0	0	0	0	0	0	0	0	0	0	0	0	0	0	0
547660	k__Bacteria	p__Bacteroidetes	c__Bacteroidia	o__Bacteroidales	f__unclassified	g__unclassified	s__unclassified	number.1 gg_id:00000 some annotation	0	0	0	0	0	0	0	0	0	0	0	0	0	0	0	0	0	0	0	0	0	0	0	0	0	0	0	0	2	0	0	0	0	0	0	0	0	0	0	0	0
469903	k__Bacteria	p__Proteobacteria	c__Gammaproteobacteria	o__Cardiobacteriales	f__Cardiobacteriaceae	g__Cardiobacterium	s__Cardiobacterium_hominis	number.1 gg_id:00000 some annotation	0	0	0	0	1	2	15	0	0	0	2	0	90	4	1	16	0	0	0	0	1	0	11	0	1	0	0	0	64	0	0	0	0	0	0	0	907	0	0	0	2
260018	k__Bacteria	p__Firmicutes	c__Clostridia	o__Clostridiales	f__Lachnospiraceae	g__unclassified	s__unclassified	number.1 gg_id:00000 some annotation	0	0	0	0	0	0	0	0	1	0	0	0	0	0	0	0	0	0	0	0	0	0	0	0	0	0	0	0	0	0	0	0	0	0	0	0	0	0	0	0	0
363305	k__Bacteria	p__Firmicutes	c__Bacilli	o__Lactobacillales	f__Leuconostocaceae	g__Leuconostoc	s__unclassified	number.1 gg_id:00000 some annotation	0	0	0	0	0	0	0	0	0	0	0	0	0	0	0	0	0	0	0	0	0	0	0	0	0	0	0	0	0	0	0	0	0	0	0	0	0	0	0	0	0
58295	k__Bacteria	p__Actinobacteria	c__Actinobacteria	o__Actinomycetales	f__Corynebacteriaceae	g__Corynebacterium	s__Corynebacterium_durum	number.1 gg_id:00000 some annotation	0	220	1	0	266	5	2	7	3	1	0	0	6	0	0	0	0	0	0	0	0	0	4	0	0	0	0	0	2	0	2	0	0	80	0	18	6	0	2	0	0
321671	k__Bacteria	p__Bacteroidetes	c__Bacteroidia	o__Bacteroidales	f__RikenellaceaeII	g__unclassified	s__unclassified	number.1 gg_id:00000 some annotation	0	0	0	0	0	0	0	0	51	0	0	0	0	0	0	0	0	0	0	0	0	0	0	0	0	0	0	0	0	65	0	0	0	0	0	0	0	0	0	0	0
71202	k__Bacteria	p__Firmicutes	c__Clostridia	o__Clostridiales	f__Veillonellaceae	g__Dialister	s__unclassified	number.1 gg_id:00000 some annotation	0	0	0	0	0	0	0	0	0	0	0	1	0	0	0	0	0	0	0	0	0	0	0	0	0	0	0	0	0	0	0	0	0	0	16	0	0	0	0	0	0
157547	k__Bacteria	p__Proteobacteria	c__Gammaproteobacteria	o__Enterobacteriales	f__Enterobacteriaceae	g__unclassified	s__unclassified	number.1 gg_id:00000 some annotation	0	0	0	0	0	2	0	0	0	0	0	0	0	0	0	0	0	0	0	0	0	0	0	0	0	0	0	0	0	0	0	0	0	0	0	0	0	0	1	0	0
280706	k__Bacteria	p__Proteobacteria	c__Gammaproteobacteria	o__Enterobacteriales	f__Enterobacteriaceae	g__unclassified	s__unclassified	number.1 gg_id:00000 some annotation	0	0	0	0	0	0	0	0	0	0	0	0	0	0	0	0	0	0	0	0	0	0	0	0	0	0	0	0	0	1	0	0	0	1	0	0	0	0	0	0	0
59529	k__Bacteria	p__Firmicutes	c__Clostridia	o__Clostridiales	f__Veillonellaceae	g__Selenomonas	s__unclassified	number.1 gg_id:00000 some annotation	0	0	0	0	0	0	0	0	0	0	0	0	0	0	0	0	0	0	0	6	0	0	0	0	0	0	0	0	0	0	0	0	0	0	0	0	0	0	0	0	0
345936	k__Bacteria	p__Firmicutes	c__Clostridia	o__Clostridiales	f__Lachnospiraceae	g__unclassified	s__unclassified	number.1 gg_id:00000 some annotation	0	0	0	0	0	0	0	0	6	0	0	0	0	0	0	0	0	0	0	0	0	0	0	0	0	0	0	0	0	0	0	0	0	0	0	0	0	0	0	0	0
325608	k__Bacteria	p__Firmicutes	c__Clostridia	o__Clostridiales	f__Clostridiaceae	g__Clostridium	s__unclassified	number.1 gg_id:00000 some annotation	0	0	0	0	0	0	0	0	0	0	0	0	0	0	0	0	0	0	0	0	0	0	0	0	0	0	0	0	0	0	0	0	0	0	0	0	0	0	0	0	0
6864	k__Bacteria	p__Proteobacteria	c__Betaproteobacteria	o__Burkholderiales	f__Alcaligenaceae	g__Alcaligenes	s__Alcaligenes_faecalis	number.1 gg_id:00000 some annotation	0	0	0	0	0	0	0	0	0	0	0	0	0	0	0	0	0	0	0	0	0	0	0	0	0	0	0	0	0	0	0	0	0	0	0	0	0	0	0	0	0
564650	k__Bacteria	p__Bacteroidetes	c__Sphingobacteria	o__Sphingobacteriales	f__Saprospiraceae	g__unclassified	s__unclassified	number.1 gg_id:00000 some annotation	0	0	0	0	0	0	0	0	0	0	0	0	0	0	0	0	0	0	0	0	0	0	0	0	0	0	0	0	0	0	0	0	0	0	0	0	0	0	0	0	0
335267	k__Bacteria	p__Firmicutes	c__Clostridia	o__Clostridiales	f__Lachnospiraceae	g__unclassified	s__unclassified	number.1 gg_id:00000 some annotation	0	0	0	0	0	0	0	0	1	0	0	0	0	0	0	0	0	0	0	0	0	0	0	0	0	0	0	0	0	0	0	0	0	0	0	0	0	0	0	0	0
263661	k__Bacteria	p__Firmicutes	c__Clostridia	o__Clostridiales	f__Ruminococcaceae	g__unclassified	s__unclassified	number.1 gg_id:00000 some annotation	0	0	0	0	0	0	0	0	0	0	0	0	0	0	0	0	0	0	0	0	0	0	0	0	0	0	0	0	0	0	0	0	0	0	0	0	0	0	0	0	0
219733	k__Bacteria	p__Firmicutes	c__Clostridia	o__Clostridiales	f__unclassified	g__unclassified	s__unclassified	number.1 gg_id:00000 some annotation	0	0	0	0	0	0	0	0	0	0	0	0	0	0	0	0	0	0	0	0	0	0	0	0	0	0	0	0	0	0	0	0	0	0	0	0	0	0	0	0	0
264461	k__Bacteria	p__Firmicutes	c__Clostridia	o__Clostridiales	f__Lachnospiraceae	g__Clostridium	s__unclassified	number.1 gg_id:00000 some annotation	0	0	0	0	0	0	0	0	12	0	0	0	0	0	0	0	0	0	0	0	0	0	0	0	0	0	0	0	0	0	0	0	0	0	0	0	0	0	0	0	0
233664	k__Bacteria	p__Bacteroidetes	c__Bacteroidia	o__Bacteroidales	f__Rikenellaceae	g__Alistipes	s__unclassified	number.1 gg_id:00000 some annotation	0	0	0	0	0	0	0	0	171	0	0	0	0	0	0	0	0	0	0	0	0	0	0	0	0	0	0	0	0	0	0	0	0	95	0	0	0	0	0	0	0
8250	k__Bacteria	p__Proteobacteria	c__Gammaproteobacteria	o__Pseudomonadales	f__Moraxellaceae	g__unclassified	s__unclassified	number.1 gg_id:00000 some annotation	0	0	0	0	0	0	0	0	0	0	0	0	0	3	0	0	0	0	0	0	0	0	0	0	0	0	0	0	0	0	0	0	0	0	0	0	0	0	0	0	0
143021	k__Bacteria	p__Bacteroidetes	c__Flavobacteria	o__Flavobacteriales	f__Flavobacteriaceae	g__Flavobacterium	s__unclassified	number.1 gg_id:00000 some annotation	0	0	1	0	0	0	0	0	0	0	0	0	0	0	0	0	0	0	0	0	0	0	0	0	0	0	0	0	0	0	0	0	0	0	0	0	0	0	0	0	0
584176	k__Bacteria	p__Proteobacteria	c__Gammaproteobacteria	o__Pseudomonadales	f__Moraxellaceae	g__Acinetobacter	s__Acinetobacter_rhizosphaerae	number.1 gg_id:00000 some annotation	0	0	0	0	27	0	0	0	0	0	0	0	0	0	0	0	0	0	0	0	0	0	0	0	0	0	0	0	0	0	0	0	0	0	0	0	0	0	0	0	0
331117	k__Bacteria	p__Firmicutes	c__Clostridia	o__Clostridiales	f__Lachnospiraceae	g__unclassified	s__unclassified	number.1 gg_id:00000 some annotation	0	0	0	0	0	0	0	0	33	0	0	0	0	0	0	0	0	0	0	0	0	0	0	0	0	0	0	0	0	1	0	0	0	0	0	0	0	0	0	0	0
197016	k__Bacteria	p__Bacteroidetes	c__Bacteroidia	o__Bacteroidales	f__Bacteroidaceae	g__Bacteroides	s__unclassified	number.1 gg_id:00000 some annotation	0	0	0	0	0	0	0	0	0	0	0	0	0	0	0	0	0	0	0	0	0	1	0	0	0	0	0	0	0	5	0	0	0	3	0	0	0	0	0	0	1
156433	k__Bacteria	p__Firmicutes	c__Bacilli	o__Lactobacillales	f__Carnobacteriaceae	g__Granulicatella	s__unclassified	number.1 gg_id:00000 some annotation	0	0	0	0	0	0	0	0	0	0	0	0	0	0	0	0	0	0	0	0	0	1	0	0	2	0	0	0	0	0	0	2	0	0	0	0	0	0	0	0	0
193067	k__Bacteria	p__Firmicutes	c__Clostridia	o__Clostridiales	f__Lachnospiraceae	g__Roseburia	s__Eubacterium_rectale	number.1 gg_id:00000 some annotation	0	0	0	0	0	0	0	0	14	0	0	0	0	0	0	0	0	0	0	0	0	0	0	0	0	0	0	0	0	0	0	0	0	0	0	0	0	0	0	0	0
590825	k__Bacteria	p__Proteobacteria	c__Gammaproteobacteria	o__Oceanospirillales	f__Oceanospirillaceae	g__Marinomonas	s__unclassified	number.1 gg_id:00000 some annotation	0	0	0	0	0	0	0	0	0	0	0	0	0	0	0	0	0	0	0	0	0	0	0	0	0	0	0	0	2	0	0	0	0	0	0	0	0	0	0	0	0
1468	k__Bacteria	p__Nitrospirae	c__Nitrospira	o__Nitrospirales	f__Nitrospiraceae	g__Nitrospira	s__unclassified	number.1 gg_id:00000 some annotation	0	0	0	0	0	0	0	0	0	0	0	0	0	0	0	0	0	0	0	0	0	0	0	0	0	0	0	0	0	0	0	0	0	0	0	0	0	0	0	0	0
234488	k__Bacteria	p__Bacteroidetes	c__Bacteroidia	o__Bacteroidales	f__Bacteroidaceae	g__Bacteroides	s__unclassified	number.1 gg_id:00000 some annotation	0	0	0	0	0	0	0	0	0	0	0	0	0	0	0	0	0	0	0	0	0	0	0	0	0	0	0	0	0	1	0	0	0	0	0	0	0	1	0	0	0
111121	k__Bacteria	p__Firmicutes	c__Bacilli	o__unclassified	f__unclassified	g__unclassified	s__unclassified	number.1 gg_id:00000 some annotation	0	0	0	0	0	0	0	0	0	0	0	0	0	0	0	0	0	0	0	0	0	0	0	0	0	0	0	0	0	0	0	0	0	0	0	0	0	0	0	0	0
584289	k__Bacteria	p__Proteobacteria	c__Betaproteobacteria	o__Burkholderiales	f__Comamonadaceae	g__unclassified	s__unclassified	number.1 gg_id:00000 some annotation	0	0	0	0	0	1	0	0	3	0	0	0	0	0	0	0	0	0	0	0	0	0	0	0	0	0	0	0	0	0	0	0	0	0	0	0	0	0	0	0	0
229820	k__Bacteria	p__Firmicutes	c__Clostridia	o__Clostridiales	f__Dehalobacteriaceae	g__Dehalobacterium	s__unclassified	number.1 gg_id:00000 some annotation	0	0	0	0	0	0	0	0	10	0	0	0	0	0	0	0	0	0	0	0	0	0	0	0	0	0	0	0	0	0	0	0	0	0	0	0	0	0	0	0	0
540230	k__Bacteria	p__Firmicutes	c__Bacilli	o__Lactobacillales	f__Enterococcaceae	g__Enterococcus	s__unclassified	number.1 gg_id:00000 some annotation	0	0	0	0	0	0	1	0	0	0	0	0	0	0	0	0	0	0	0	0	0	0	0	0	0	0	0	0	0	1	0	0	0	0	0	0	0	0	0	0	1
228512	k__Bacteria	p__Firmicutes	c__Clostridia	o__Clostridiales	f__Lachnospiraceae	g__unclassified	s__unclassified	number.1 gg_id:00000 some annotation	0	0	0	0	0	0	0	0	12	0	0	0	0	0	0	0	0	0	0	0	0	0	0	0	0	0	0	0	0	3	0	0	0	0	0	0	0	0	0	0	0
35735	k__Bacteria	p__Proteobacteria	c__Gammaproteobacteria	o__Pasteurellales	f__Pasteurellaceae	g__unclassified	s__unclassified	number.1 gg_id:00000 some annotation	0	0	0	0	0	0	0	0	0	0	0	0	1	0	0	0	0	0	0	0	0	0	0	0	0	0	0	0	0	0	0	0	0	0	0	0	0	0	0	0	0
239506	k__Bacteria	p__Bacteroidetes	c__Bacteroidia	o__Bacteroidales	f__Prevotellaceae	g__Prevotella	s__unclassified	number.1 gg_id:00000 some annotation	7	0	2	0	0	0	6	3	0	12	14	2	3	0	0	35	0	6	0	41	0	0	3	13	0	0	1	0	0	0	1	5	5	0	6	0	0	67	0	0	37
109771	k__Bacteria	p__Firmicutes	c__Clostridia	o__Clostridiales	f__Veillonellaceae	g__Dialister	s__unclassified	number.1 gg_id:00000 some annotation	0	0	0	0	0	0	0	0	0	0	0	0	0	0	0	0	0	0	20	1	0	0	0	0	0	0	0	0	0	0	0	0	0	0	5	0	0	0	0	0	0
9822	k__Bacteria	p__Proteobacteria	c__Gammaproteobacteria	o__Enterobacteriales	f__Enterobacteriaceae	g__unclassified	s__unclassified	number.1 gg_id:00000 some annotation	0	0	0	0	0	0	0	0	0	0	0	0	0	0	0	0	0	0	0	0	0	1	0	0	0	0	0	0	0	0	0	0	0	0	0	0	0	0	0	0	0
184209	k__Bacteria	p__Bacteroidetes	c__Bacteroidia	o__Bacteroidales	f__Bacteroidaceae	g__Bacteroides	s__unclassified	number.1 gg_id:00000 some annotation	0	0	0	0	0	0	0	0	1	0	0	0	0	0	0	0	0	0	0	0	0	0	0	0	0	0	0	0	0	0	0	0	0	0	0	0	0	0	0	0	0
131765	k__Bacteria	p__Bacteroidetes	c__Bacteroidia	o__Bacteroidales	f__Porphyromonadaceae	g__Porphyromonas	s__unclassified	number.1 gg_id:00000 some annotation	0	0	0	0	2	0	0	0	3	0	0	0	31	3	72	2	0	1	0	2	0	0	0	0	875	0	2	0	0	0	0	0	0	0	3	0	1	0	0	106	1138
129923	k__Bacteria	p__Proteobacteria	c__Gammaproteobacteria	o__Oceanospirillales	f__Halomonadaceae	g__Chromohalobacter	s__unclassified	number.1 gg_id:00000 some annotation	0	0	0	0	0	0	0	0	0	0	0	0	0	0	0	0	0	0	0	0	0	0	0	0	0	0	0	0	0	0	0	0	0	0	0	0	0	0	0	0	0
324918	k__Bacteria	p__Proteobacteria	c__Alphaproteobacteria	o__Rhizobiales	f__Methylobacteriaceae	g__Methylobacterium	s__unclassified	number.1 gg_id:00000 some annotation	0	0	0	0	0	0	0	0	0	0	0	0	0	0	0	0	0	0	0	0	0	0	0	0	0	0	0	0	0	0	0	0	0	0	0	0	0	0	0	0	0
180689	k__Bacteria	p__Proteobacteria	c__Betaproteobacteria	o__Burkholderiales	f__unclassified	g__unclassified	s__unclassified	number.1 gg_id:00000 some annotation	0	0	0	0	0	0	0	0	1	0	0	0	0	0	0	0	0	0	0	0	0	0	0	0	0	0	0	0	0	0	0	0	0	0	0	0	0	0	0	0	0
318920	k__Bacteria	p__Actinobacteria	c__Actinobacteria	o__Actinomycetales	f__Cellulomonadaceae	g__unclassified	s__unclassified	number.1 gg_id:00000 some annotation	0	0	0	0	0	0	0	0	0	0	0	0	0	0	0	0	0	0	0	0	0	0	0	0	0	0	0	0	0	0	0	0	0	0	0	0	0	0	0	0	0
318215	k__Bacteria	p__Bacteroidetes	c__Bacteroidia	o__Bacteroidales	f__Bacteroidaceae	g__Bacteroides	s__unclassified	number.1 gg_id:00000 some annotation	0	0	0	0	4	0	0	0	370	0	0	0	0	0	1	0	0	0	0	0	0	0	0	0	0	0	0	0	0	114	0	0	0	246	0	0	0	0	0	0	0
3947	k__Bacteria	p__Spirochaetes	c__Spirochaetes	o__Spirochaetales	f__Spirochaetaceae	g__Treponema	s__Treponema_medium	number.1 gg_id:00000 some annotation	0	0	0	0	0	0	0	0	0	0	0	0	0	1	0	0	0	0	0	64	0	3	0	0	0	0	0	0	0	0	0	0	0	0	1	0	0	0	0	0	0
263842	k__Bacteria	p__Proteobacteria	c__Betaproteobacteria	o__Rhodocyclales	f__Rhodocyclaceae	g__Thauera	s__unclassified	number.1 gg_id:00000 some annotation	0	0	1	0	0	0	0	0	0	0	0	0	0	0	0	0	0	0	0	0	0	0	0	0	0	0	0	0	0	0	0	0	0	0	0	0	0	0	0	0	0
256533	k__Bacteria	p__Firmicutes	c__Bacilli	o__Bacillales	f__Bacillaceae	g__Bacillus	s__Bacillus_weihenstephanensis	number.1 gg_id:00000 some annotation	0	0	0	0	0	0	0	0	0	0	0	0	0	0	0	0	0	0	0	0	0	0	0	0	0	0	0	0	2	0	0	0	0	0	0	0	0	0	0	0	0
170926	k__Bacteria	p__Firmicutes	c__Clostridia	o__Clostridiales	f__Ruminococcaceae	g__unclassified	s__unclassified	number.1 gg_id:00000 some annotation	0	0	0	0	0	0	0	0	11	0	0	0	0	0	0	0	0	0	0	0	0	0	0	0	0	0	0	0	0	0	0	0	0	0	0	0	0	0	0	0	0
457356	k__Bacteria	p__Bacteroidetes	c__Bacteroidia	o__Bacteroidales	f__RikenellaceaeII	g__unclassified	s__unclassified	number.1 gg_id:00000 some annotation	0	0	0	0	0	0	0	0	0	0	0	0	0	0	0	0	0	0	0	0	0	0	0	0	0	0	0	0	0	0	0	0	0	0	0	0	0	0	0	0	0
342948	k__Bacteria	p__Firmicutes	c__Clostridia	o__Clostridiales	f__Lachnospiraceae	g__unclassified	s__unclassified	number.1 gg_id:00000 some annotation	0	0	0	0	0	0	0	0	1	0	0	0	0	0	0	0	0	0	0	0	0	0	0	0	0	0	0	0	0	0	0	0	0	0	0	0	0	0	0	0	0
214715	k__Bacteria	p__Bacteroidetes	c__Bacteroidia	o__Bacteroidales	f__RikenellaceaeII	g__unclassified	s__unclassified	number.1 gg_id:00000 some annotation	0	0	0	0	0	0	0	0	0	0	0	0	0	0	0	0	0	0	0	0	0	0	0	0	0	0	0	0	0	0	0	0	0	0	0	0	0	0	0	0	0
243860	k__Bacteria	p__Proteobacteria	c__Betaproteobacteria	o__Burkholderiales	f__Burkholderiaceae	g__Ralstonia	s__unclassified	number.1 gg_id:00000 some annotation	0	0	0	0	0	0	0	0	0	0	0	0	0	0	0	0	0	0	0	0	0	0	0	0	0	0	0	0	1	0	0	0	0	0	0	0	0	0	0	0	1
60234	k__Bacteria	p__Actinobacteria	c__Actinobacteria	o__Actinomycetales	f__Corynebacteriaceae	g__Corynebacterium	s__unclassified	number.1 gg_id:00000 some annotation	0	0	0	0	0	0	0	0	0	0	0	0	0	0	0	0	0	0	0	0	0	144	0	0	0	0	0	0	0	0	0	0	0	0	0	0	0	0	0	0	0
311254	k__Bacteria	p__Actinobacteria	c__Actinobacteria	o__Actinomycetales	f__Microbacteriaceae	g__Microcella	s__unclassified	number.1 gg_id:00000 some annotation	0	0	0	0	0	0	1	0	6	0	0	0	0	0	0	0	0	0	0	0	0	0	0	0	0	0	0	0	0	0	0	0	0	0	0	0	0	0	0	0	0
259218	k__Bacteria	p__Firmicutes	c__Clostridia	o__Clostridiales	f__Lachnospiraceae	g__unclassified	s__unclassified	number.1 gg_id:00000 some annotation	0	0	0	0	0	0	0	0	0	0	0	0	0	0	0	0	0	0	0	1	0	0	0	0	0	0	0	0	0	0	0	0	0	0	0	0	0	0	0	0	0
6678	k__Bacteria	p__Proteobacteria	c__Betaproteobacteria	o__Hydrogenophilales	f__Hydrogenophilaceae	g__Hydrogenophilus	s__unclassified	number.1 gg_id:00000 some annotation	0	0	0	0	0	0	0	0	0	0	0	0	0	0	0	0	0	0	0	0	0	0	0	0	0	0	0	0	0	0	0	0	0	0	0	0	0	0	0	0	0
93513	k__Bacteria	p__Bacteroidetes	c__Bacteroidia	o__Bacteroidales	f__Porphyromonadaceae	g__Porphyromonas	s__Porphyromonas_gingivalis	number.1 gg_id:00000 some annotation	0	0	1	0	0	0	0	0	0	0	0	0	0	58	0	0	0	0	0	23	6	0	0	0	0	27	0	0	91	0	0	0	0	0	75	0	0	0	0	0	0
527641	k__Bacteria	p__Bacteroidetes	c__Flavobacteria	o__Flavobacteriales	f__Flavobacteriaceae	g__unclassified	s__unclassified	number.1 gg_id:00000 some annotation	0	0	0	0	0	0	0	0	0	0	0	0	0	0	0	0	0	0	0	0	0	0	0	0	0	0	0	0	1	0	0	0	0	0	0	0	0	0	0	0	0
26308	k__Bacteria	p__Bacteroidetes	c__Sphingobacteria	o__Sphingobacteriales	f__Sphingobacteriaceae	g__Sphingobacterium	s__Sphingobacterium_multivorum	number.1 gg_id:00000 some annotation	0	0	0	0	0	0	0	0	0	0	0	0	0	0	0	0	0	0	0	0	0	10	0	0	0	0	0	0	0	0	0	0	0	0	0	0	0	0	0	0	0
114591	k__Bacteria	p__Proteobacteria	c__Alphaproteobacteria	o__Sphingomonadales	f__Sphingomonadaceae	g__Sphingomonas	s__unclassified	number.1 gg_id:00000 some annotation	0	0	0	0	0	0	0	0	8	0	0	0	0	0	0	0	0	0	0	0	0	0	0	0	0	0	0	0	0	0	0	0	0	0	0	0	0	0	0	0	0
593598	k__Bacteria	p__Proteobacteria	c__Betaproteobacteria	o__Burkholderiales	f__Comamonadaceae	g__unclassified	s__unclassified	number.1 gg_id:00000 some annotation	0	0	0	0	0	0	0	0	0	0	0	0	0	0	0	0	0	0	0	0	0	1	0	0	0	0	0	0	0	0	0	0	0	0	0	0	0	0	0	0	0
593848	k__Bacteria	p__Proteobacteria	c__Gammaproteobacteria	o__Xanthomonadales	f__Xanthomonadaceae	g__Stenotrophomonas	s__unclassified	number.1 gg_id:00000 some annotation	0	0	0	0	0	0	0	0	8	0	0	0	0	0	0	0	0	0	0	0	0	26	0	0	0	0	0	0	0	0	0	0	0	0	0	0	0	0	0	0	0
190872	k__Bacteria	p__Tenericutes	c__Erysipelotrichi	o__Erysipelotrichales	f__Erysipelotrichaceae	g__Clostridium	s__unclassified	number.1 gg_id:00000 some annotation	0	0	0	0	0	0	0	0	0	0	0	0	0	0	0	0	0	0	0	0	0	0	0	0	0	0	0	0	0	1	0	0	0	0	0	0	0	0	0	0	0
332808	k__Bacteria	p__Cyanobacteria	c__Chloroplast	o__Stramenopiles	f__unclassified	g__unclassified	s__unclassified	number.1 gg_id:00000 some annotation	0	0	0	0	0	0	0	0	0	0	0	0	0	0	0	0	0	0	0	0	0	0	0	0	0	0	0	0	0	0	0	0	0	0	0	0	0	0	0	0	0
81251	k__Bacteria	p__Actinobacteria	c__Actinobacteria	o__Actinomycetales	f__Actinomycetaceae	g__Actinobaculum	s__Actinobaculum_schaalii	number.1 gg_id:00000 some annotation	0	0	0	0	0	0	0	0	0	0	0	0	0	0	0	0	0	0	0	0	0	0	0	0	27	0	0	0	0	0	0	0	0	0	0	0	0	0	0	0	0
215065	k__Bacteria	p__Tenericutes	c__Mollicutes	o__Anaeroplasmatales	f__Anaeroplasmataceae	g__Anaeroplasma	s__unclassified	number.1 gg_id:00000 some annotation	0	0	0	0	0	0	0	0	7	0	0	0	0	0	0	0	0	0	0	0	0	0	0	0	0	0	0	0	0	0	0	0	0	0	0	0	0	0	0	0	0
539313	k__Bacteria	p__Proteobacteria	c__Betaproteobacteria	o__Rhodocyclales	f__Rhodocyclaceae	g__unclassified	s__unclassified	number.1 gg_id:00000 some annotation	0	0	5	0	7	0	1	1	2	0	0	0	0	0	0	2	1	0	0	0	0	0	0	0	0	1	0	0	4	0	0	0	0	0	0	0	0	0	0	0	0
348142	k__Bacteria	p__Firmicutes	c__Clostridia	o__Clostridiales	f__Lachnospiraceae	g__unclassified	s__unclassified	number.1 gg_id:00000 some annotation	0	0	0	0	0	0	0	0	1	0	0	0	0	0	0	0	0	0	0	0	0	0	0	0	0	0	0	0	0	0	0	0	0	0	0	0	0	0	0	0	0
36255	k__Bacteria	p__Firmicutes	c__Bacilli	o__Gemellales	f__Gemellaceae	g__Gemella	s__unclassified	number.1 gg_id:00000 some annotation	0	0	0	0	0	2	1	0	0	0	1	2	0	0	0	0	0	0	0	0	0	0	0	0	0	0	0	0	0	0	0	0	0	0	0	0	0	0	0	0	0
293360	k__Bacteria	p__Firmicutes	c__Clostridia	o__Clostridiales	f__Ruminococcaceae	g__unclassified	s__unclassified	number.1 gg_id:00000 some annotation	0	0	0	0	0	0	0	0	0	0	0	0	0	0	0	0	0	0	0	0	0	0	0	0	0	0	0	0	0	0	0	0	0	0	0	0	0	0	0	0	0
376387	k__Bacteria	p__Bacteroidetes	c__Flavobacteria	o__Flavobacteriales	f__Cryomorphaceae	g__Fluviicola	s__unclassified	number.1 gg_id:00000 some annotation	0	0	0	0	2	0	0	0	0	0	0	0	0	0	0	0	0	0	0	0	0	0	0	0	0	0	0	0	0	0	0	0	0	0	0	0	0	0	0	0	0
274208	k__Bacteria	p__Firmicutes	c__Clostridia	o__Clostridiales	f__Veillonellaceae	g__Megasphaera	s__Megasphaera_elsdenii	number.1 gg_id:00000 some annotation	0	0	0	0	0	0	0	0	0	0	0	0	0	0	0	0	0	0	0	0	0	0	0	0	0	0	0	0	0	0	0	0	0	0	0	0	0	0	0	0	0
14010	k__Bacteria	p__Firmicutes	c__Clostridia	o__Clostridiales	f__Lachnospiraceae	g__Johnsonella	s__unclassified	number.1 gg_id:00000 some annotation	0	0	0	0	0	0	0	0	0	0	0	0	0	4	0	0	0	0	0	2	0	0	27	0	0	1	0	0	0	0	0	0	0	0	1	0	0	0	0	0	0
574943	k__Bacteria	p__Actinobacteria	c__Actinobacteria	o__Acidimicrobiales	f__unclassified	g__unclassified	s__unclassified	number.1 gg_id:00000 some annotation	0	0	0	0	0	0	0	0	0	0	0	0	0	0	0	0	0	0	0	0	0	0	0	0	0	0	0	0	0	0	0	0	0	0	0	0	0	0	0	0	0
237208	k__Bacteria	p__Proteobacteria	c__Alphaproteobacteria	o__Rhizobiales	f__Methylobacteriaceae	g__Methylobacterium	s__unclassified	number.1 gg_id:00000 some annotation	0	0	0	0	0	0	0	0	0	2	0	0	1	0	0	0	0	0	0	0	0	20	0	0	0	0	0	0	0	0	0	0	0	0	0	0	0	0	0	0	2
470724	k__Bacteria	p__Proteobacteria	c__Betaproteobacteria	o__Neisseriales	f__Neisseriaceae	g__Neisseria	s__unclassified	number.1 gg_id:00000 some annotation	0	13	0	3	3	0	19	1	0	18	5	0	66	0	0	10	0	0	0	0	2	1	1	0	0	0	1	0	5	0	0	0	3	2	1	1	1	0	0	0	15
237754	k__Bacteria	p__Verrucomicrobia	c__Verrucomicrobiae	o__Verrucomicrobiales	f__unclassified	g__unclassified	s__unclassified	number.1 gg_id:00000 some annotation	0	0	0	0	0	0	0	0	0	0	0	0	0	0	0	0	0	0	0	0	0	0	0	0	0	0	0	0	0	0	0	0	0	0	0	0	0	0	0	0	0
579562	k__Bacteria	p__Firmicutes	c__Clostridia	o__Clostridiales	f__Ruminococcaceae	g__unclassified	s__unclassified	number.1 gg_id:00000 some annotation	0	0	0	0	0	0	0	0	14	0	0	0	0	0	0	0	0	0	0	0	0	0	0	0	0	0	0	0	0	0	0	0	0	0	0	0	0	0	0	0	0
265057	k__Bacteria	p__Proteobacteria	c__Alphaproteobacteria	o__Caulobacterales	f__Caulobacteraceae	g__Brevundimonas	s__Brevundimonas_diminuta	number.1 gg_id:00000 some annotation	0	0	0	0	0	0	0	0	0	0	0	0	0	0	0	0	0	0	0	0	0	251	0	0	0	0	0	0	0	0	0	0	0	0	0	0	0	0	0	0	0
236623	k__Bacteria	p__Fusobacteria	c__Fusobacteria	o__Fusobacteriales	f__Fusobacteriaceae	g__Leptotrichia	s__unclassified	number.1 gg_id:00000 some annotation	42	11	1	2	2	0	8	2	0	13	8	0	105	0	6	34	66	68	0	0	0	116	28	1	0	0	22	1	446	0	5	3766	0	0	2	0	34	0	0	0	37
53470	k__Bacteria	p__Firmicutes	c__Bacilli	o__Lactobacillales	f__unclassified	g__unclassified	s__unclassified	number.1 gg_id:00000 some annotation	0	0	0	1	0	0	0	0	0	0	0	0	0	0	0	0	0	0	0	0	0	0	0	0	0	0	0	0	0	0	0	0	0	0	0	0	1	0	0	0	0
146190	k__Bacteria	p__Proteobacteria	c__Deltaproteobacteria	o__Desulfovibrionales	f__Desulfovibrionaceae	g__Desulfovibrio	s__D168	number.1 gg_id:00000 some annotation	0	0	0	0	0	0	0	0	0	0	0	0	0	0	2	0	0	0	0	11	0	0	0	0	0	0	0	0	0	0	0	0	0	0	0	0	0	0	0	0	0
274686	k__Bacteria	p__Firmicutes	c__Clostridia	o__Clostridiales	f__Ruminococcaceae	g__Oscillospira	s__unclassified	number.1 gg_id:00000 some annotation	0	0	0	0	0	0	0	0	32	0	0	0	0	0	0	0	0	0	0	0	0	0	0	0	0	0	0	0	1	0	0	0	0	0	0	0	0	0	0	0	0
180864	k__Bacteria	p__Firmicutes	c__Clostridia	o__Clostridiales	f__Lachnospiraceae	g__unclassified	s__unclassified	number.1 gg_id:00000 some annotation	0	0	0	0	0	0	0	1	0	0	0	0	0	0	0	0	0	0	0	0	0	0	0	0	0	0	0	0	0	0	0	0	0	0	0	0	0	0	0	0	0
14163	k__Bacteria	p__Firmicutes	c__Clostridia	o__Clostridiales	f__Clostridiales_Family_XIII._Incertae_Sedis	g__Mogibacterium	s__unclassified	number.1 gg_id:00000 some annotation	0	0	0	0	0	0	0	0	0	2	1	8	12	0	3	0	0	0	0	0	4	0	0	0	0	0	0	0	1	0	0	0	0	0	3	0	0	0	0	0	0
58604	k__Bacteria	p__Proteobacteria	c__Betaproteobacteria	o__Burkholderiales	f__Comamonadaceae	g__unclassified	s__unclassified	number.1 gg_id:00000 some annotation	0	0	0	0	0	0	0	0	0	0	0	0	0	0	0	0	0	0	0	0	0	0	0	0	0	0	0	0	0	0	0	0	0	0	0	0	0	0	0	0	0
94716	k__Bacteria	p__Proteobacteria	c__Betaproteobacteria	o__Neisseriales	f__Neisseriaceae	g__unclassified	s__unclassified	number.1 gg_id:00000 some annotation	0	0	0	0	0	0	0	0	0	0	1	0	0	0	0	0	0	0	0	0	0	0	0	0	0	0	0	0	0	0	0	0	0	0	0	0	0	0	0	0	0
106166	k__Bacteria	p__Actinobacteria	c__Actinobacteria	o__Actinomycetales	f__Actinomycetaceae	g__Actinomyces	s__Actinomyces_oris	number.1 gg_id:00000 some annotation	3	758	343	1	206	13	26	9	57	6	3	30	23	46	71	21	139	0	1	0	2	83	611	0	0	21	0	0	354	1	2	1	0	0	11	19	1915	0	158	0	3
3549	k__Bacteria	p__Cyanobacteria	c__Chloroplast	o__Streptophyta	f__unclassified	g__unclassified	s__unclassified	number.1 gg_id:00000 some annotation	0	0	0	0	0	0	0	0	0	0	0	0	0	0	0	0	0	0	0	0	0	0	0	0	0	0	0	0	0	0	0	0	0	0	0	0	0	0	0	0	0
419024	k__Bacteria	p__Actinobacteria	c__Actinobacteria	o__Coriobacteriales	f__Coriobacteriaceae	g__Adlercreutzia	s__unclassified	number.1 gg_id:00000 some annotation	0	0	0	0	0	0	0	0	19	0	0	0	0	0	0	0	0	0	0	0	0	0	0	0	0	0	0	0	0	0	0	0	0	0	0	0	0	0	0	0	0
341374	k__Bacteria	p__Actinobacteria	c__Actinobacteria	o__Coriobacteriales	f__Coriobacteriaceae	g__Olsenella	s__unclassified	number.1 gg_id:00000 some annotation	0	0	0	0	0	0	0	0	0	0	0	0	1	0	0	0	0	0	0	0	0	0	0	42	0	0	0	0	0	0	0	0	0	0	0	0	0	31	0	0	1
202754	k__Bacteria	p__Bacteroidetes	c__Bacteroidia	o__Bacteroidales	f__RikenellaceaeII	g__unclassified	s__unclassified	number.1 gg_id:00000 some annotation	0	0	0	0	0	0	0	0	2	0	0	0	0	0	0	0	0	0	0	0	0	0	0	0	0	0	0	0	0	1	0	0	0	2	0	0	0	0	0	0	0
470219	k__Bacteria	p__Actinobacteria	c__Actinobacteria	o__Actinomycetales	f__Corynebacteriaceae	g__Corynebacterium	s__unclassified	number.1 gg_id:00000 some annotation	0	0	0	0	0	0	0	0	4	0	0	0	0	4	0	0	0	0	0	0	0	43	0	0	0	0	0	0	5	0	0	0	0	0	0	0	0	0	0	0	1
469868	k__Bacteria	p__Actinobacteria	c__Actinobacteria	o__Bifidobacteriales	f__Bifidobacteriaceae	g__Bifidobacterium	s__unclassified	number.1 gg_id:00000 some annotation	0	0	0	0	0	0	2	0	0	0	0	2	1	138	1	0	1	0	0	0	0	0	0	0	0	0	0	0	0	0	0	0	0	0	8	13	0	0	0	0	6
113900	k__Bacteria	p__Firmicutes	c__Bacilli	o__Lactobacillales	f__Streptococcaceae	g__Streptococcus	s__unclassified	number.1 gg_id:00000 some annotation	0	0	0	0	0	0	0	0	0	0	0	0	0	0	0	0	0	0	0	0	0	0	0	0	0	0	0	1	0	0	0	0	0	0	0	0	0	0	0	0	0
274533	k__Bacteria	p__Firmicutes	c__Clostridia	o__Clostridiales	f__Ruminococcaceae	g__unclassified	s__unclassified	number.1 gg_id:00000 some annotation	0	0	0	0	0	0	0	0	4	0	0	0	0	0	0	0	0	0	0	0	0	0	0	0	0	0	0	0	0	0	0	0	0	0	0	0	0	0	0	0	0
179681	k__Bacteria	p__Bacteroidetes	c__Bacteroidia	o__Bacteroidales	f__RikenellaceaeII	g__unclassified	s__unclassified	number.1 gg_id:00000 some annotation	0	0	0	0	0	0	0	0	58	0	0	0	0	0	0	0	0	0	0	0	0	0	0	0	0	0	0	0	0	145	0	0	0	51	0	0	0	0	0	0	0
233691	k__Bacteria	p__Firmicutes	c__Clostridia	o__Clostridiales	f__Lachnospiraceae	g__unclassified	s__unclassified	number.1 gg_id:00000 some annotation	0	0	0	0	0	0	0	0	1	0	0	0	0	0	0	0	0	0	0	0	0	0	0	0	0	0	0	0	0	0	0	0	0	0	0	0	0	0	0	0	0
160115	k__Bacteria	p__Proteobacteria	c__Gammaproteobacteria	o__Xanthomonadales	f__Xanthomonadaceae	g__Stenotrophomonas	s__unclassified	number.1 gg_id:00000 some annotation	0	0	0	0	0	0	0	5	0	0	0	0	0	0	0	0	0	0	0	0	0	150	0	0	0	0	0	0	0	0	0	0	0	0	0	0	0	8	0	0	0
288565	k__Bacteria	p__Fusobacteria	c__Fusobacteria	o__Fusobacteriales	f__Fusobacteriaceae	g__Fusobacterium	s__unclassified	number.1 gg_id:00000 some annotation	0	0	0	0	0	0	0	0	0	0	0	0	0	0	0	0	0	0	0	0	0	0	0	0	0	2	0	0	0	0	0	0	0	0	0	0	0	0	0	0	0
568886	k__Bacteria	p__Actinobacteria	c__Actinobacteria	o__Actinomycetales	f__Micrococcaceae	g__unclassified	s__unclassified	number.1 gg_id:00000 some annotation	0	0	0	0	0	0	0	0	1	0	0	0	0	0	0	0	0	0	0	0	0	0	0	0	0	0	0	0	0	0	0	0	0	0	0	0	0	0	0	0	0
542975	k__Bacteria	p__Actinobacteria	c__Actinobacteria	o__Actinomycetales	f__Microbacteriaceae	g__unclassified	s__unclassified	number.1 gg_id:00000 some annotation	0	0	0	0	0	0	0	0	0	0	0	0	0	0	0	0	0	0	0	0	0	0	0	0	0	0	0	0	0	0	0	0	0	0	0	0	0	0	0	0	0
470451	k__Bacteria	p__Fusobacteria	c__Fusobacteria	o__Fusobacteriales	f__Fusobacteriaceae	g__Fusobacterium	s__unclassified	number.1 gg_id:00000 some annotation	0	0	0	0	0	0	0	0	0	0	0	0	0	0	0	0	0	0	0	0	0	0	0	0	0	0	0	0	0	0	0	0	0	0	0	0	0	0	0	0	0
67513	k__Bacteria	p__Actinobacteria	c__Actinobacteria	o__Actinomycetales	f__Actinomycetaceae	g__Actinomyces	s__unclassified	number.1 gg_id:00000 some annotation	0	0	0	0	1	0	0	0	0	0	0	6	0	0	3	0	0	0	0	0	0	0	0	1	1	12	0	0	0	0	1	0	0	0	2	0	0	5	0	5	0
182810	k__Bacteria	p__Bacteroidetes	c__Bacteroidia	o__Bacteroidales	f__Bacteroidaceae	g__Bacteroides	s__unclassified	number.1 gg_id:00000 some annotation	0	0	0	0	0	0	0	0	0	0	0	0	0	0	0	0	0	0	0	0	0	0	0	0	0	0	0	0	0	0	0	0	0	0	0	0	0	0	0	0	0
327583	k__Bacteria	p__Proteobacteria	c__Betaproteobacteria	o__Burkholderiales	f__Comamonadaceae	g__unclassified	s__unclassified	number.1 gg_id:00000 some annotation	0	0	0	0	1	0	0	0	1	0	0	0	0	0	0	0	0	0	0	0	0	38	1	0	0	0	0	0	0	3	0	0	0	0	0	0	0	0	0	0	1
242536	k__Bacteria	p__Firmicutes	c__Clostridia	o__Clostridiales	f__Lachnospiraceae	g__unclassified	s__unclassified	number.1 gg_id:00000 some annotation	0	0	0	0	0	0	0	0	0	0	0	0	0	0	0	0	0	0	0	0	0	0	0	0	0	0	0	0	0	64	0	0	0	0	0	0	0	0	0	0	0
307370	k__Bacteria	p__Firmicutes	c__Clostridia	o__Clostridiales	f__Clostridiales_Family_XI._Incertae_Sedis	g__Anaerococcus	s__unclassified	number.1 gg_id:00000 some annotation	0	0	0	0	0	0	0	0	0	0	0	0	0	3	0	0	0	0	0	0	0	0	0	0	1	0	0	0	0	0	0	0	0	0	0	0	0	0	0	0	0
233583	k__Bacteria	p__Firmicutes	c__Clostridia	o__Clostridiales	f__Lachnospiraceae	g__unclassified	s__unclassified	number.1 gg_id:00000 some annotation	0	0	0	0	0	0	0	0	8	0	0	0	0	0	0	0	0	0	0	0	0	0	0	0	0	0	0	0	0	0	0	0	0	0	0	0	0	0	0	0	0
17854	k__Bacteria	p__Spirochaetes	c__Spirochaetes	o__Spirochaetales	f__Spirochaetaceae	g__Treponema	s__Treponema_parvum	number.1 gg_id:00000 some annotation	0	0	0	0	0	0	0	0	0	0	0	0	0	1	0	0	0	0	0	7	2	0	0	0	0	0	0	0	0	0	0	0	0	0	1	0	0	0	0	0	0
1415	k__Bacteria	p__Thermi	c__Deinococci	o__Deinococcales	f__Deinococcaceae	g__Deinococcus	s__unclassified	number.1 gg_id:00000 some annotation	0	0	0	0	0	0	0	0	0	0	0	0	0	1	0	0	0	0	0	0	0	0	0	0	0	0	0	0	0	0	0	0	0	0	0	0	0	0	0	0	0
111135	k__Bacteria	p__Proteobacteria	c__Betaproteobacteria	o__Burkholderiales	f__Alcaligenaceae	g__Sutterella	s__unclassified	number.1 gg_id:00000 some annotation	0	0	0	0	0	0	0	0	0	0	0	0	0	0	0	0	0	0	0	0	0	0	0	0	0	0	0	0	0	0	0	0	0	0	0	0	0	0	0	0	0
111134	k__Bacteria	p__Actinobacteria	c__Actinobacteria	o__Actinomycetales	f__Corynebacteriaceae	g__unclassified	s__unclassified	number.1 gg_id:00000 some annotation	0	0	0	0	0	0	0	0	0	0	0	0	0	2	0	0	0	0	0	0	0	0	0	0	0	0	0	0	0	0	0	0	0	0	0	0	0	0	0	0	0
577339	k__Bacteria	p__Bacteroidetes	c__Flavobacteria	o__Flavobacteriales	f__Flavobacteriaceae	g__Elizabethkingia	s__Elizabethkingia_meningoseptica	number.1 gg_id:00000 some annotation	0	0	0	0	2	0	0	0	0	0	0	0	0	0	0	0	0	0	0	0	0	0	0	0	0	0	0	0	0	0	0	0	0	0	0	0	0	0	0	0	0
259916	k__Bacteria	p__Firmicutes	c__Clostridia	o__Clostridiales	f__Lachnospiraceae	g__unclassified	s__unclassified	number.1 gg_id:00000 some annotation	0	0	0	0	0	0	0	0	11	0	0	0	0	0	0	0	0	0	0	0	0	0	0	0	0	0	0	0	0	0	0	0	0	0	0	0	0	0	0	0	0
23777	k__Bacteria	p__Proteobacteria	c__Deltaproteobacteria	o__Desulfovibrionales	f__Desulfomicrobiaceae	g__Desulfomicrobium	s__Desulfomicrobium_orale	number.1 gg_id:00000 some annotation	0	0	0	0	0	0	0	0	0	0	0	0	0	0	0	0	0	0	0	1	0	0	0	0	0	0	0	0	0	0	0	0	0	0	3	0	0	0	0	0	0
124523	k__Bacteria	p__Spirochaetes	c__Spirochaetes	o__Spirochaetales	f__Spirochaetaceae	g__Treponema	s__unclassified	number.1 gg_id:00000 some annotation	0	0	0	0	0	0	0	0	0	0	0	0	0	0	0	0	0	0	0	0	0	0	1	0	0	0	0	0	0	0	0	0	0	0	0	0	0	0	0	0	0
593908	k__Bacteria	p__Proteobacteria	c__Gammaproteobacteria	o__Xanthomonadales	f__Xanthomonadaceae	g__unclassified	s__unclassified	number.1 gg_id:00000 some annotation	0	0	0	0	0	0	2	0	0	0	0	0	0	0	0	0	0	0	0	0	0	0	0	0	0	0	0	0	0	0	0	0	0	0	0	0	0	0	0	0	0
27669	k__Bacteria	p__Proteobacteria	c__Gammaproteobacteria	o__Chromatiales	f__Sinobacteraceae	g__unclassified	s__unclassified	number.1 gg_id:00000 some annotation	0	0	0	0	0	0	0	0	0	1	0	0	0	0	0	0	0	0	0	0	0	0	0	0	0	0	0	0	0	0	0	0	0	0	0	0	0	0	0	0	0
127309	k__Bacteria	p__Bacteroidetes	c__Bacteroidia	o__Bacteroidales	f__Bacteroidaceae	g__Bacteroides	s__unclassified	number.1 gg_id:00000 some annotation	0	0	0	0	0	0	0	0	0	1	0	0	0	0	1	0	0	0	0	0	0	0	0	0	0	0	0	0	0	0	0	0	0	0	1	0	0	0	0	0	0
180070	k__Bacteria	p__Firmicutes	c__Clostridia	o__Clostridiales	f__Lachnospiraceae	g__Eubacterium	s__unclassified	number.1 gg_id:00000 some annotation	0	0	0	0	0	0	0	0	0	0	0	0	0	0	0	0	0	0	0	0	0	0	0	0	0	0	0	0	0	1	0	0	0	1	0	0	0	0	0	0	0
147100	k__Bacteria	p__Firmicutes	c__Clostridia	o__Clostridiales	f__Ruminococcaceae	g__unclassified	s__unclassified	number.1 gg_id:00000 some annotation	0	0	0	0	0	0	0	0	0	0	0	0	0	0	0	0	0	0	0	0	0	0	0	0	0	0	0	0	0	95	0	0	0	0	0	0	0	0	0	0	0
142463	k__Bacteria	p__Bacteroidetes	c__Sphingobacteria	o__Sphingobacteriales	f__Sphingobacteriaceae	g__Pedobacter	s__unclassified	number.1 gg_id:00000 some annotation	0	0	0	0	0	0	0	0	0	0	0	0	0	0	0	0	0	0	0	0	0	0	0	0	0	0	0	0	0	0	0	0	0	0	0	0	0	0	0	0	0
19191	k__Bacteria	p__Tenericutes	c__Erysipelotrichi	o__Erysipelotrichales	f__Erysipelotrichaceae	g__Bulleidia	s__Solobacterium_moorei	number.1 gg_id:00000 some annotation	1	0	0	1	0	1	4	1	0	24	29	0	25	6	2	25	5	0	29	17	6	0	3	57	8	0	48	0	9	0	1	9	12	0	92	7	0	459	0	7	42
248535	k__Bacteria	p__Firmicutes	c__Bacilli	o__Bacillales	f__Staphylococcaceae	g__unclassified	s__unclassified	number.1 gg_id:00000 some annotation	0	0	0	0	0	0	0	0	0	0	0	0	0	0	0	0	0	0	0	0	0	0	0	0	0	0	0	0	0	0	0	0	0	0	0	0	0	0	0	0	0
3957	k__Bacteria	p__Spirochaetes	c__Spirochaetes	o__Spirochaetales	f__Spirochaetaceae	g__Treponema	s__Treponema_denticola	number.1 gg_id:00000 some annotation	0	0	0	0	0	0	0	0	0	0	0	0	0	1	0	0	0	0	0	27	2	0	0	0	0	0	0	0	0	0	0	0	0	0	0	0	0	0	0	0	0
593699	k__Bacteria	p__Actinobacteria	c__Actinobacteria	o__Actinomycetales	f__Intrasporangiaceae	g__unclassified	s__unclassified	number.1 gg_id:00000 some annotation	0	0	0	0	0	0	0	0	0	0	0	0	0	0	0	0	0	0	0	0	0	0	0	0	0	0	0	0	0	1	0	0	0	0	0	0	0	0	0	0	0
89232	k__Bacteria	p__Bacteroidetes	c__Bacteroidia	o__Bacteroidales	f__Prevotellaceae	g__Prevotella	s__unclassified	number.1 gg_id:00000 some annotation	0	0	0	0	0	0	0	0	0	0	0	0	8	13	1	8	0	0	0	0	9	32	32	0	0	1	14	0	0	0	0	0	1	0	0	1	0	0	7	0	3
161340	k__Bacteria	p__Proteobacteria	c__Betaproteobacteria	o__Burkholderiales	f__Comamonadaceae	g__unclassified	s__unclassified	number.1 gg_id:00000 some annotation	0	0	0	0	0	2	0	0	5	0	0	0	0	0	0	0	0	0	0	0	0	0	0	0	0	0	0	0	0	0	0	0	0	0	0	0	0	0	0	0	0
73998	k__Bacteria	p__Firmicutes	c__Clostridia	o__Clostridiales	f__Eubacteriaceae	g__Eubacterium	s__unclassified	number.1 gg_id:00000 some annotation	0	0	0	0	0	0	0	0	0	0	0	0	0	3	0	7	0	0	172	170	0	0	4	0	0	0	0	0	0	0	0	0	0	0	6	0	0	0	0	0	0
342959	k__Bacteria	p__Proteobacteria	c__Betaproteobacteria	o__Burkholderiales	f__Comamonadaceae	g__Limnohabitans	s__unclassified	number.1 gg_id:00000 some annotation	0	0	0	0	0	0	0	0	0	0	0	0	0	0	0	0	0	0	0	0	0	3	0	0	0	0	0	0	0	0	0	0	0	0	0	0	0	0	0	0	0
343424	k__Bacteria	p__Proteobacteria	c__Gammaproteobacteria	o__Pasteurellales	f__Pasteurellaceae	g__unclassified	s__unclassified	number.1 gg_id:00000 some annotation	0	0	0	0	1	0	0	0	0	1	0	0	0	0	0	0	0	0	0	0	0	0	0	0	0	0	0	0	0	0	0	0	0	0	0	0	0	0	0	0	0
15233	k__Bacteria	p__Firmicutes	c__Bacilli	o__Lactobacillales	f__Lactobacillaceae	g__Lactobacillus	s__unclassified	number.1 gg_id:00000 some annotation	0	0	0	0	0	0	0	0	0	0	0	0	0	1	0	0	0	0	0	0	0	0	0	0	0	2	0	0	0	0	0	0	0	0	0	0	0	0	0	0	0
12561	k__Bacteria	p__Actinobacteria	c__Actinobacteria	o__Actinomycetales	f__Actinomycetaceae	g__Actinomyces	s__unclassified	number.1 gg_id:00000 some annotation	0	0	0	0	0	0	0	0	0	0	0	0	0	0	0	0	0	0	0	0	0	0	1	0	0	0	0	0	0	0	0	0	0	0	0	0	0	0	0	0	0
228502	k__Bacteria	p__Firmicutes	c__Clostridia	o__Clostridiales	f__Ruminococcaceae	g__Clostridium	s__unclassified	number.1 gg_id:00000 some annotation	0	0	0	0	0	0	0	0	10	0	0	0	0	0	0	0	0	0	0	0	0	0	0	0	0	0	0	0	0	0	0	0	0	0	0	0	0	0	0	0	0
127545	k__Bacteria	p__Bacteroidetes	c__Bacteroidia	o__Bacteroidales	f__Prevotellaceae	g__Prevotella	s__unclassified	number.1 gg_id:00000 some annotation	0	0	0	0	0	0	0	0	0	0	0	0	0	0	0	0	0	0	0	3	1	0	0	0	0	0	0	0	0	0	0	0	0	0	1	0	0	0	0	0	0
73352	k__Bacteria	p__Proteobacteria	c__Gammaproteobacteria	o__Pseudomonadales	f__Pseudomonadaceae	g__Pseudomonas	s__unclassified	number.1 gg_id:00000 some annotation	0	0	0	0	0	0	0	0	0	0	0	0	0	0	0	0	0	0	0	0	0	0	0	0	0	0	0	0	0	0	0	0	0	0	0	0	0	0	0	0	0
177911	k__Bacteria	p__Firmicutes	c__Clostridia	o__Clostridiales	f__Lachnospiraceae	g__unclassified	s__unclassified	number.1 gg_id:00000 some annotation	0	0	0	0	0	0	0	0	0	0	0	0	0	0	0	0	0	0	0	0	0	0	0	0	0	0	0	0	0	0	0	0	0	0	0	0	0	0	1	0	0
276312	k__Bacteria	p__Firmicutes	c__Clostridia	o__Clostridiales	f__Lachnospiraceae	g__unclassified	s__unclassified	number.1 gg_id:00000 some annotation	0	0	0	0	0	0	0	0	67	0	0	0	0	0	0	0	0	0	0	0	0	0	0	0	0	0	0	0	0	0	0	0	0	0	0	0	0	0	0	0	0
230573	k__Bacteria	p__Firmicutes	c__Clostridia	o__Clostridiales	f__Lachnospiraceae	g__unclassified	s__unclassified	number.1 gg_id:00000 some annotation	0	0	0	0	0	0	0	0	11	0	0	0	0	0	0	0	0	0	0	0	0	0	0	0	0	0	0	0	0	0	0	0	0	0	0	0	0	0	0	0	0
114748	k__Bacteria	p__Proteobacteria	c__Gammaproteobacteria	o__Enterobacteriales	f__Enterobacteriaceae	g__unclassified	s__unclassified	number.1 gg_id:00000 some annotation	0	0	0	0	0	0	0	0	0	0	0	0	0	0	0	0	0	0	0	0	0	1	0	0	0	0	0	0	0	0	0	0	0	0	0	0	0	0	0	0	0
131391	k__Bacteria	p__Actinobacteria	c__Actinobacteria	o__Bifidobacteriales	f__Bifidobacteriaceae	g__Bifidobacterium	s__unclassified	number.1 gg_id:00000 some annotation	0	0	0	0	0	0	0	0	0	0	0	0	0	0	0	0	0	0	0	0	0	0	0	0	0	4	0	0	0	0	0	0	0	0	0	0	0	0	0	0	0
88758	k__Bacteria	p__Proteobacteria	c__Betaproteobacteria	o__Burkholderiales	f__unclassified	g__unclassified	s__unclassified	number.1 gg_id:00000 some annotation	0	0	0	0	0	0	0	0	0	0	0	0	0	0	0	0	0	0	0	0	0	0	0	0	0	0	0	0	0	0	0	0	0	0	0	0	0	0	0	0	0
341579	k__Bacteria	p__Proteobacteria	c__Betaproteobacteria	o__Burkholderiales	f__unclassified	g__unclassified	s__unclassified	number.1 gg_id:00000 some annotation	0	0	0	0	0	0	0	0	0	0	0	0	0	0	0	0	0	0	0	0	0	0	0	0	0	0	0	0	0	0	0	0	0	0	0	0	0	0	0	0	0
165734	k__Bacteria	p__Firmicutes	c__Clostridia	o__Clostridiales	f__Ruminococcaceae	g__Oscillospira	s__unclassified	number.1 gg_id:00000 some annotation	0	0	0	0	0	0	0	0	0	0	0	0	0	0	0	0	0	0	0	0	0	0	0	0	0	0	0	0	0	0	0	0	1	0	0	0	0	0	0	0	0
87223	k__Bacteria	p__Firmicutes	c__Clostridia	o__Clostridiales	f__Veillonellaceae	g__Selenomonas	s__unclassified	number.1 gg_id:00000 some annotation	0	0	0	0	0	0	0	0	0	5	7	0	1	36	0	3	0	0	0	4	1	0	5	0	0	0	0	1	0	0	0	0	0	0	2	0	0	0	0	0	0
60555	k__Bacteria	p__Thermi	c__Deinococci	o__Thermales	f__Thermaceae	g__Thermus	s__unclassified	number.1 gg_id:00000 some annotation	0	0	0	0	0	0	0	0	0	0	0	0	0	0	0	0	0	0	0	0	0	0	0	0	0	0	0	0	0	0	0	0	0	0	0	0	0	0	0	0	0
550364	k__Bacteria	p__Firmicutes	c__Clostridia	o__Clostridiales	f__Veillonellaceae	g__Selenomonas	s__unclassified	number.1 gg_id:00000 some annotation	0	1	0	0	0	0	2	0	0	10	17	0	2	33	1	0	0	1	12	22	35	0	1678	0	0	1	0	0	0	0	0	0	0	0	0	7	243	0	7	0	0
376024	k__Bacteria	p__Firmicutes	c__Bacilli	o__Lactobacillales	f__Lactobacillaceae	g__Lactobacillus	s__Lactobacillus_vaginalis	number.1 gg_id:00000 some annotation	0	0	0	0	0	0	0	0	0	0	0	1	0	0	0	0	0	0	0	0	0	0	0	0	0	0	0	0	0	0	0	0	0	1	0	0	0	0	0	0	0
514200	k__Bacteria	p__Firmicutes	c__Clostridia	o__Clostridiales	f__Lachnospiraceae	g__Moryella	s__Moryella_indoligenes	number.1 gg_id:00000 some annotation	0	0	0	0	0	0	0	0	0	0	0	0	0	0	0	0	0	0	0	0	37	1	0	0	0	0	0	0	0	0	0	0	0	0	0	0	0	0	0	0	0
172622	k__Bacteria	p__Firmicutes	c__Clostridia	o__Clostridiales	f__Lachnospiraceae	g__Coprococcus	s__unclassified	number.1 gg_id:00000 some annotation	0	0	0	0	0	0	0	0	12	0	0	0	0	0	0	0	0	0	0	0	0	0	0	0	0	0	0	0	0	0	0	0	0	0	0	0	0	0	0	0	0
260565	k__Bacteria	p__Proteobacteria	c__Betaproteobacteria	o__Burkholderiales	f__unclassified	g__unclassified	s__unclassified	number.1 gg_id:00000 some annotation	0	0	0	0	0	0	0	0	0	0	0	0	0	0	0	0	0	0	0	0	0	0	0	0	0	0	0	0	0	0	0	0	0	0	0	0	0	0	0	0	0
332814	k__Bacteria	p__Firmicutes	c__Clostridia	o__Clostridiales	f__Ruminococcaceae	g__unclassified	s__unclassified	number.1 gg_id:00000 some annotation	0	0	0	0	0	0	0	0	0	0	0	0	0	0	0	0	0	0	0	0	0	0	0	0	0	0	0	0	0	1	0	0	0	0	0	0	0	0	0	0	0
192739	k__Bacteria	p__Firmicutes	c__Bacilli	o__Lactobacillales	f__Streptococcaceae	g__Streptococcus	s__Streptococcus_sobrinus	number.1 gg_id:00000 some annotation	0	0	0	0	0	0	0	0	0	0	0	0	0	9	0	0	0	0	0	0	0	0	0	0	0	0	0	0	0	0	0	0	0	0	1	0	0	0	0	0	0
440684	k__Bacteria	p__Firmicutes	c__Clostridia	o__Clostridiales	f__Catabacteriaceae	g__unclassified	s__unclassified	number.1 gg_id:00000 some annotation	0	0	0	0	0	0	0	0	19	0	0	0	0	0	0	0	0	0	0	0	3	0	0	0	0	0	0	0	0	195	0	0	0	204	0	0	0	0	0	0	0
581021	k__Bacteria	p__Proteobacteria	c__Gammaproteobacteria	o__Enterobacteriales	f__Enterobacteriaceae	g__unclassified	s__unclassified	number.1 gg_id:00000 some annotation	0	0	0	0	0	0	0	0	0	0	0	0	0	0	0	0	0	0	0	0	0	2	0	0	0	0	0	0	0	3	0	0	0	1	0	0	0	0	1	0	0
184577	k__Bacteria	p__Firmicutes	c__Clostridia	o__Clostridiales	f__Lachnospiraceae	g__Eubacterium	s__unclassified	number.1 gg_id:00000 some annotation	0	0	0	0	0	0	0	0	0	0	0	0	0	0	0	0	0	0	0	0	0	0	0	0	0	0	0	0	0	0	0	0	0	0	0	0	0	0	0	0	0
200309	k__Bacteria	p__Proteobacteria	c__Epsilonproteobacteria	o__Campylobacterales	f__Campylobacteraceae	g__Campylobacter	s__unclassified	number.1 gg_id:00000 some annotation	0	0	0	0	0	0	0	0	0	0	0	0	0	2	0	0	0	15	1	0	0	0	6	0	0	0	0	0	0	0	0	0	0	0	0	1	19	0	0	0	0
82260	k__Bacteria	p__Bacteroidetes	c__Flavobacteria	o__Flavobacteriales	f__Flavobacteriaceae	g__unclassified	s__unclassified	number.1 gg_id:00000 some annotation	0	0	0	0	0	0	0	0	0	0	0	0	0	0	0	0	0	0	0	0	0	1	0	0	0	0	0	0	0	0	0	0	0	0	0	0	0	0	0	0	1
277228	k__Bacteria	p__Firmicutes	c__Clostridia	o__Clostridiales	f__Ruminococcaceae	g__unclassified	s__unclassified	number.1 gg_id:00000 some annotation	0	0	0	0	0	0	0	0	18	0	0	0	0	0	0	0	0	0	0	0	0	0	0	0	0	0	0	0	0	101	0	0	0	0	0	0	0	0	0	0	0
177195	k__Bacteria	p__Firmicutes	c__Clostridia	o__Clostridiales	f__Lachnospiraceae	g__unclassified	s__unclassified	number.1 gg_id:00000 some annotation	0	0	0	0	0	0	0	1	0	0	0	0	0	0	0	0	0	0	0	0	0	0	0	0	0	0	0	0	0	114	0	0	0	0	0	0	0	0	0	0	0
11431	k__Bacteria	p__Actinobacteria	c__Actinobacteria	o__Actinomycetales	f__Cellulomonadaceae	g__unclassified	s__unclassified	number.1 gg_id:00000 some annotation	0	0	0	0	0	0	0	0	0	0	0	0	0	0	0	0	0	0	0	0	0	0	0	0	0	0	0	0	0	0	0	0	0	0	0	0	0	0	0	0	0
293221	k__Bacteria	p__Firmicutes	c__Clostridia	o__Clostridiales	f__Lachnospiraceae	g__Roseburia	s__unclassified	number.1 gg_id:00000 some annotation	0	0	0	0	0	0	0	0	0	0	0	0	0	0	0	0	0	0	0	0	0	0	0	0	0	0	0	0	0	0	0	0	0	0	0	0	0	0	0	0	0
515620	k__Bacteria	p__Firmicutes	c__Clostridia	o__Clostridiales	f__Peptostreptococcaceae	g__Peptostreptococcus	s__unclassified	number.1 gg_id:00000 some annotation	0	0	3	1	1	0	0	4	0	24	7	11	14	10	1	45	0	147	1331	136	52	54	12	288	0	1	295	0	0	0	4	68	0	0	57	3	0	292	0	1	36
554111	k__Bacteria	p__Proteobacteria	c__Gammaproteobacteria	o__Pseudomonadales	f__Pseudomonadaceae	g__Pseudomonas	s__unclassified	number.1 gg_id:00000 some annotation	0	0	0	0	0	0	0	0	0	0	0	0	0	0	0	0	0	0	0	0	0	0	0	0	0	0	0	0	0	0	0	0	0	1	0	0	0	0	0	0	0
563047	k__Bacteria	p__Proteobacteria	c__Betaproteobacteria	o__Burkholderiales	f__Burkholderiaceae	g__Lautropia	s__unclassified	number.1 gg_id:00000 some annotation	4	1259	763	4	7	5	8	1	0	1	0	0	74	4	0	164	0	45	0	0	0	106	54	1	0	0	0	138	82	0	0	1	0	236	2	12	236	0	248	0	60
410048	k__Bacteria	p__Proteobacteria	c__Gammaproteobacteria	o__Pseudomonadales	f__Pseudomonadaceae	g__Pseudomonas	s__unclassified	number.1 gg_id:00000 some annotation	0	0	0	0	0	0	0	0	0	0	0	0	0	0	0	0	0	0	0	0	0	0	0	0	0	0	0	0	0	0	0	0	0	0	0	0	0	0	0	0	0
138778	k__Bacteria	p__Proteobacteria	c__Gammaproteobacteria	o__Oceanospirillales	f__OM60	g__unclassified	s__unclassified	number.1 gg_id:00000 some annotation	0	0	0	0	0	0	0	0	0	0	0	0	0	0	0	0	0	0	0	0	0	0	0	0	0	0	0	0	0	0	0	0	0	97	0	0	0	0	0	0	0
199654	k__Bacteria	p__Firmicutes	c__Clostridia	o__Clostridiales	f__Ruminococcaceae	g__Ruminococcus	s__unclassified	number.1 gg_id:00000 some annotation	0	0	0	0	0	0	0	0	0	0	0	0	0	0	0	1	0	0	0	0	0	0	0	0	0	0	0	0	0	0	0	0	0	0	0	0	0	0	0	0	0
560773	k__Bacteria	p__Proteobacteria	c__Alphaproteobacteria	o__Sphingomonadales	f__Sphingomonadaceae	g__Sphingomonas	s__Sphingomonas_asaccharolytica	number.1 gg_id:00000 some annotation	0	0	0	0	0	0	0	0	9	0	0	0	0	0	0	1	0	0	0	0	0	0	0	0	0	0	0	0	0	0	0	0	0	0	0	0	0	0	0	0	0
81664	k__Bacteria	p__Proteobacteria	c__Betaproteobacteria	o__Burkholderiales	f__unclassified	g__unclassified	s__unclassified	number.1 gg_id:00000 some annotation	0	0	1	0	0	0	0	0	0	0	0	0	0	0	0	0	0	0	0	0	0	0	0	0	0	0	0	0	0	0	0	0	0	0	0	0	0	0	0	0	0
197930	k__Bacteria	p__Firmicutes	c__Clostridia	o__Clostridiales	f__Lachnospiraceae	g__Roseburia	s__unclassified	number.1 gg_id:00000 some annotation	0	0	0	0	0	0	0	0	0	0	0	0	0	0	0	0	0	0	0	0	0	0	0	0	0	0	0	0	0	0	0	0	0	0	0	0	0	0	0	0	0
386765	k__Bacteria	p__Firmicutes	c__Clostridia	o__Clostridiales	f__Ruminococcaceae	g__unclassified	s__unclassified	number.1 gg_id:00000 some annotation	0	0	0	0	0	0	0	0	0	0	0	0	0	0	0	0	0	0	0	0	0	0	0	0	0	0	0	0	0	0	0	0	0	0	0	0	0	0	0	0	0
250642	k__Bacteria	p__Proteobacteria	c__Gammaproteobacteria	o__Enterobacteriales	f__Enterobacteriaceae	g__unclassified	s__unclassified	number.1 gg_id:00000 some annotation	0	0	0	0	0	0	0	0	0	0	0	0	0	0	0	0	0	0	0	0	0	0	0	0	0	0	0	0	0	1	0	0	0	0	0	0	0	0	0	0	0
204197	k__Bacteria	p__Proteobacteria	c__Gammaproteobacteria	o__Pasteurellales	f__Pasteurellaceae	g__Actinobacillus	s__unclassified	number.1 gg_id:00000 some annotation	44	47	173	266	125	6	621	491	755	13	7	0	1546	7	18	400	0	25	2	1	1	201	286	1	3305	1	1	1093	13181	0	1136	54	1	1	1	10	1	1	37	1175	1
236294	k__Bacteria	p__Actinobacteria	c__Actinobacteria	o__Actinomycetales	f__Micrococcaceae	g__Renibacterium	s__unclassified	number.1 gg_id:00000 some annotation	0	0	0	0	0	1	0	0	0	0	0	0	0	0	0	0	0	0	0	0	0	0	0	0	0	0	0	0	0	0	0	0	0	0	0	0	0	0	0	0	0
535160	k__Bacteria	p__Proteobacteria	c__Gammaproteobacteria	o__Pseudomonadales	f__Moraxellaceae	g__Acinetobacter	s__Acinetobacter_johnsonii	number.1 gg_id:00000 some annotation	0	0	0	0	0	0	3	0	0	0	0	0	0	0	0	0	0	0	0	0	0	136	0	0	0	1	0	0	0	0	0	0	0	0	0	0	0	0	0	0	0
426016	k__Bacteria	p__Bacteroidetes	c__Flavobacteria	o__Flavobacteriales	f__Flavobacteriaceae	g__Flavobacterium	s__unclassified	number.1 gg_id:00000 some annotation	0	0	0	0	2	0	0	0	1	1	0	0	0	0	0	0	0	0	0	0	0	0	0	0	0	0	0	0	0	0	0	0	0	0	0	0	0	0	0	0	0
200697	k__Bacteria	p__Proteobacteria	c__Gammaproteobacteria	o__Enterobacteriales	f__Enterobacteriaceae	g__unclassified	s__unclassified	number.1 gg_id:00000 some annotation	0	0	0	0	0	0	0	0	0	0	1	0	0	0	0	0	0	0	0	0	0	0	0	0	0	0	0	0	0	0	0	0	0	1	0	0	0	0	0	0	0
70625	k__Bacteria	p__Firmicutes	c__Bacilli	o__Lactobacillales	f__Aerococcaceae	g__unclassified	s__unclassified	number.1 gg_id:00000 some annotation	0	0	4	0	4	0	1	0	0	0	0	0	0	0	0	0	0	0	0	0	0	0	0	0	0	0	0	0	0	0	0	0	0	0	0	0	0	0	0	0	0
172053	k__Bacteria	p__Proteobacteria	c__Betaproteobacteria	o__Burkholderiales	f__unclassified	g__unclassified	s__unclassified	number.1 gg_id:00000 some annotation	0	0	0	0	2	0	0	0	0	0	0	0	0	0	0	0	0	0	0	0	0	0	0	0	0	0	0	0	0	0	0	0	0	0	0	0	0	0	0	0	0
278687	k__Bacteria	p__Proteobacteria	c__Alphaproteobacteria	o__Sphingomonadales	f__unclassified	g__unclassified	s__unclassified	number.1 gg_id:00000 some annotation	0	0	0	0	0	0	0	0	0	0	0	0	0	0	0	0	1	0	0	0	0	0	0	0	0	0	0	0	0	0	0	0	0	0	0	0	0	0	0	0	0
289177	k__Bacteria	p__Firmicutes	c__Clostridia	o__Clostridiales	f__Lachnospiraceae	g__unclassified	s__unclassified	number.1 gg_id:00000 some annotation	0	0	0	0	0	0	0	0	0	0	0	0	0	0	0	0	0	0	0	0	0	0	0	0	0	0	0	0	0	0	0	0	0	0	0	0	0	0	0	0	0
37441	k__Bacteria	p__Actinobacteria	c__Actinobacteria	o__Actinomycetales	f__Microbacteriaceae	g__unclassified	s__unclassified	number.1 gg_id:00000 some annotation	0	0	0	0	0	0	0	0	1	0	0	0	0	0	0	0	0	0	0	0	0	0	0	0	0	0	0	0	0	0	0	0	0	0	0	0	0	0	0	0	0
470738	k__Bacteria	p__Proteobacteria	c__Betaproteobacteria	o__Neisseriales	f__Neisseriaceae	g__Neisseria	s__unclassified	number.1 gg_id:00000 some annotation	142	4784	32	6641	610	390	535	2808	502	161	177	2	6666	27	10	2174	3	175	27	6	605	674	88	26	4	4	52	56	1534	60	8323	2	56	185	1820	600	219	2961	4733	5	1839
435928	k__Bacteria	p__Actinobacteria	c__Actinobacteria	o__Actinomycetales	f__Microbacteriaceae	g__unclassified	s__unclassified	number.1 gg_id:00000 some annotation	0	0	0	0	0	0	0	0	0	0	0	0	0	0	0	0	0	0	0	0	0	0	0	0	0	2	0	0	0	0	0	0	0	0	0	0	0	0	0	0	1
2000	k__Bacteria	p__Bacteroidetes	c__Bacteroidia	o__Bacteroidales	f__Bacteroidaceae	g__Bacteroides	s__Bacteroides_fragilis	number.1 gg_id:00000 some annotation	0	0	0	0	0	0	0	0	5	0	0	0	1	0	0	0	0	0	0	0	0	5	1	0	0	0	0	1	0	485	0	0	0	7	0	0	0	0	0	0	0
190464	k__Bacteria	p__Firmicutes	c__Clostridia	o__Clostridiales	f__Lachnospiraceae	g__Coprococcus	s__unclassified	number.1 gg_id:00000 some annotation	0	0	0	0	0	0	0	0	0	0	0	0	0	0	0	0	0	0	0	0	0	0	0	0	0	0	0	0	0	0	0	0	0	0	0	0	0	0	0	0	0
162077	k__Bacteria	p__Proteobacteria	c__Epsilonproteobacteria	o__Campylobacterales	f__Campylobacteraceae	g__Campylobacter	s__unclassified	number.1 gg_id:00000 some annotation	1	0	14	44	0	1	15	25	3	34	15	16	9	40	13	54	268	647	119	0	16	0	144	34	9	52	18	1	7	0	60	7	410	0	3	8	136	240	30	11	75
185951	k__Bacteria	p__Firmicutes	c__Clostridia	o__Clostridiales	f__Lachnospiraceae	g__Blautia	s__unclassified	number.1 gg_id:00000 some annotation	0	0	0	0	0	0	0	0	0	0	0	0	0	0	0	0	0	0	0	0	0	1	0	0	0	2	0	0	1	113	0	0	0	97	0	0	0	0	0	0	0
105593	k__Bacteria	p__Proteobacteria	c__Betaproteobacteria	o__Neisseriales	f__Neisseriaceae	g__unclassified	s__unclassified	number.1 gg_id:00000 some annotation	0	0	0	0	0	0	0	0	0	0	0	0	0	0	0	0	0	0	0	0	0	0	0	0	0	0	0	0	0	0	1	0	0	0	0	0	0	0	0	0	0
295103	k__Bacteria	p__Bacteroidetes	c__Bacteroidia	o__Bacteroidales	f__Prevotellaceae	g__Prevotella	s__unclassified	number.1 gg_id:00000 some annotation	0	0	0	0	0	0	0	0	0	0	0	0	0	0	0	0	0	0	0	0	0	0	0	0	0	0	0	0	0	0	0	0	0	0	0	3	0	0	0	0	0
14178	k__Bacteria	p__Firmicutes	c__Clostridia	o__Clostridiales	f__Peptostreptococcaceae	g__Filifactor	s__unclassified	number.1 gg_id:00000 some annotation	0	0	0	0	0	0	0	0	0	0	0	0	0	73	0	0	0	1	7	293	0	0	0	0	0	0	102	0	0	0	0	0	0	0	40	0	0	0	0	0	17
42877	k__Bacteria	p__Spirochaetes	c__Spirochaetes	o__Spirochaetales	f__Spirochaetaceae	g__Treponema	s__unclassified	number.1 gg_id:00000 some annotation	0	0	0	0	0	0	0	0	0	0	0	0	0	0	0	0	0	0	4	17	0	0	0	0	0	0	0	0	0	0	0	0	0	0	2	0	0	0	0	0	0
469920	k__Bacteria	p__Firmicutes	c__Bacilli	o__Lactobacillales	f__Aerococcaceae	g__Abiotrophia	s__Abiotrophia_defectiva	number.1 gg_id:00000 some annotation	0	45	0	0	1	1	4	0	0	0	0	0	0	10	0	8	0	1	0	0	0	3	25	0	0	0	0	2	0	0	0	0	0	0	3	0	26	0	0	0	113
526872	k__Bacteria	p__Proteobacteria	c__Gammaproteobacteria	o__Pasteurellales	f__Pasteurellaceae	g__Haemophilus	s__unclassified	number.1 gg_id:00000 some annotation	1	0	1	0	24	0	1	0	0	12	33	0	0	1	3	1	0	1	1	0	0	0	1	1	4	0	0	0	1	0	0	0	1	0	0	4	0	0	1	0	1
246195	k__Bacteria	p__Synergistetes	c__Synergistia	o__Synergistales	f__Dethiosulfovibrionaceae	g__TG5	s__unclassified	number.1 gg_id:00000 some annotation	0	0	0	0	0	0	4	0	0	0	4	3	44	23	0	0	0	0	0	55	9	0	3	0	0	0	0	1	0	0	0	0	1	0	4	1	1	0	0	0	0
470599	k__Bacteria	p__Firmicutes	c__Bacilli	o__Lactobacillales	f__Lactobacillaceae	g__Lactobacillus	s__Lactobacillus_iners	number.1 gg_id:00000 some annotation	0	0	0	0	0	0	0	0	0	3	0	0	0	0	0	1	0	0	0	0	0	35	0	0	0	0	0	0	0	0	0	0	0	0	0	0	0	0	0	0	0
198450	k__Bacteria	p__Firmicutes	c__Clostridia	o__Clostridiales	f__Lachnospiraceae	g__Blautia	s__unclassified	number.1 gg_id:00000 some annotation	0	0	0	0	0	0	0	0	0	0	0	0	0	0	0	0	0	0	0	0	0	0	0	0	0	0	0	0	0	1	0	0	0	0	0	0	0	0	0	0	0
175137	k__Bacteria	p__Firmicutes	c__Clostridia	o__Clostridiales	f__Lachnospiraceae	g__unclassified	s__unclassified	number.1 gg_id:00000 some annotation	0	0	0	0	0	0	0	0	0	0	0	0	0	0	0	0	0	0	0	0	0	3	0	0	0	0	0	0	0	0	0	0	0	0	0	0	0	0	1	0	0
147830	k__Bacteria	p__Firmicutes	c__Bacilli	o__Lactobacillales	f__unclassified	g__unclassified	s__unclassified	number.1 gg_id:00000 some annotation	0	0	0	0	0	0	0	0	0	0	0	0	0	0	0	0	0	0	0	0	0	0	0	0	0	1	0	0	0	0	0	0	0	0	0	0	0	0	0	0	0
181961	k__Bacteria	p__Firmicutes	c__Clostridia	o__Clostridiales	f__Ruminococcaceae	g__Ruminococcus	s__unclassified	number.1 gg_id:00000 some annotation	0	0	0	0	0	0	0	0	0	0	0	0	0	0	0	0	0	0	0	0	0	0	0	0	0	0	0	0	0	24	0	0	0	0	0	0	0	0	0	0	0
484442	k__Bacteria	p__Firmicutes	c__Clostridia	o__Clostridiales	f__Clostridiales_Family_XIII._Incertae_Sedis	g__unclassified	s__unclassified	number.1 gg_id:00000 some annotation	0	0	0	0	0	0	0	0	0	0	0	7	22	0	3	0	0	0	0	160	1	0	1	0	0	0	0	0	0	0	0	0	0	0	17	3	0	0	0	0	0
209103	k__Bacteria	p__Firmicutes	c__Clostridia	o__Clostridiales	f__Lachnospiraceae	g__unclassified	s__unclassified	number.1 gg_id:00000 some annotation	0	0	0	0	0	0	0	0	0	0	0	0	0	0	0	0	0	0	0	0	0	16	0	0	0	0	0	0	0	0	0	0	0	0	0	0	0	0	0	0	0
138006	k__Bacteria	p__Bacteroidetes	c__Bacteroidia	o__Bacteroidales	f__Rikenellaceae	g__Alistipes	s__unclassified	number.1 gg_id:00000 some annotation	0	0	0	0	0	0	0	0	0	0	0	0	0	0	0	0	0	0	0	0	0	0	0	0	0	0	0	0	0	2	0	0	0	0	0	0	0	0	0	0	0
346400	k__Bacteria	p__Firmicutes	c__Clostridia	o__Clostridiales	f__Lachnospiraceae	g__unclassified	s__unclassified	number.1 gg_id:00000 some annotation	0	0	0	0	0	0	0	0	8	0	0	0	0	0	0	0	0	0	0	0	0	0	0	0	0	0	0	0	0	0	0	0	0	36	0	0	0	0	0	0	0
307981	k__Bacteria	p__Proteobacteria	c__Gammaproteobacteria	o__Enterobacteriales	f__Enterobacteriaceae	g__unclassified	s__unclassified	number.1 gg_id:00000 some annotation	0	0	0	0	0	0	1	0	1	0	0	0	0	0	0	1	0	0	0	0	0	0	0	0	0	0	0	0	0	14	0	0	0	2	0	0	0	0	0	0	0
270077	k__Bacteria	p__Firmicutes	c__Clostridia	o__Clostridiales	f__Lachnospiraceae	g__Lachnobacterium	s__unclassified	number.1 gg_id:00000 some annotation	0	0	0	0	0	0	0	0	0	0	3	0	0	0	0	0	0	0	0	0	0	0	0	0	0	0	0	0	0	0	0	0	0	0	0	0	0	0	0	0	0
112175	k__Bacteria	p__Proteobacteria	c__Gammaproteobacteria	o__Pseudomonadales	f__Moraxellaceae	g__unclassified	s__unclassified	number.1 gg_id:00000 some annotation	0	0	0	0	4	0	0	0	0	0	0	0	0	0	0	0	0	0	0	0	0	0	0	0	0	0	0	0	0	0	0	0	0	0	0	0	0	0	0	0	0
365758	k__Bacteria	p__Bacteroidetes	c__Bacteroidia	o__Bacteroidales	f__Prevotellaceae	g__Prevotella	s__unclassified	number.1 gg_id:00000 some annotation	0	0	0	0	0	0	0	0	21	0	0	0	0	0	0	0	0	0	0	0	0	0	0	0	0	0	0	0	0	0	0	0	0	0	0	0	0	0	0	0	0
470200	k__Bacteria	p__Actinobacteria	c__Actinobacteria	o__Actinomycetales	f__Corynebacteriaceae	g__Corynebacterium	s__Corynebacterium_glucuronolyticum	number.1 gg_id:00000 some annotation	0	0	0	0	0	0	0	0	1	0	0	0	0	0	0	0	0	0	0	0	0	0	0	0	0	0	0	0	0	0	0	0	0	0	0	0	0	0	0	0	0
528198	k__Bacteria	p__Actinobacteria	c__Actinobacteria	o__Actinomycetales	f__Actinomycetaceae	g__unclassified	s__unclassified	number.1 gg_id:00000 some annotation	0	0	0	0	0	0	0	0	0	0	0	0	0	0	0	0	0	0	0	0	0	0	0	0	0	0	0	0	0	0	0	0	0	0	0	0	0	0	0	0	0
165313	k__Bacteria	p__Proteobacteria	c__Gammaproteobacteria	o__Pseudomonadales	f__Moraxellaceae	g__Acinetobacter	s__unclassified	number.1 gg_id:00000 some annotation	0	0	0	0	0	0	0	1	0	0	0	0	0	0	0	0	0	0	0	0	0	0	1	0	0	1	0	2	0	0	0	0	0	33	0	0	0	0	2	0	0
275123	k__Bacteria	p__Firmicutes	c__Clostridia	o__Clostridiales	f__Lachnospiraceae	g__unclassified	s__unclassified	number.1 gg_id:00000 some annotation	0	0	0	0	0	0	0	0	0	0	0	0	0	0	0	0	0	0	0	0	0	0	0	0	0	0	0	0	0	0	0	0	0	0	0	0	0	0	0	0	0
470114	k__Bacteria	p__Firmicutes	c__Clostridia	o__Clostridiales	f__Ruminococcaceae	g__Clostridium	s__unclassified	number.1 gg_id:00000 some annotation	0	0	1	0	0	0	0	0	0	0	0	0	0	0	0	0	0	0	0	0	0	0	0	0	0	0	0	0	0	0	0	0	0	0	0	0	0	0	0	0	0
83011	k__Bacteria	p__Actinobacteria	c__Actinobacteria	o__Actinomycetales	f__unclassified	g__unclassified	s__unclassified	number.1 gg_id:00000 some annotation	0	0	0	0	0	0	2	0	0	1	3	0	0	0	15	6	0	0	0	0	0	0	0	0	0	0	0	0	0	0	0	0	0	0	0	0	0	0	0	0	0
264734	k__Bacteria	p__Bacteroidetes	c__Bacteroidia	o__Bacteroidales	f__RikenellaceaeII	g__unclassified	s__unclassified	number.1 gg_id:00000 some annotation	0	0	1	0	0	0	0	6	718	0	2	0	0	0	4	0	0	0	0	0	0	0	0	0	0	0	0	0	6	420	0	0	0	1256	0	0	1	6	0	0	0
254949	k__Bacteria	p__Proteobacteria	c__Deltaproteobacteria	o__Myxococcales	f__unclassified	g__unclassified	s__unclassified	number.1 gg_id:00000 some annotation	0	0	0	0	0	0	0	0	0	0	0	0	0	0	0	0	0	0	0	0	0	0	0	0	0	0	0	0	0	0	0	0	0	0	0	0	0	0	0	0	0
178146	k__Bacteria	p__Firmicutes	c__Clostridia	o__Clostridiales	f__Lachnospiraceae	g__Coprococcus	s__unclassified	number.1 gg_id:00000 some annotation	0	0	0	0	0	0	0	0	0	0	0	0	0	0	0	0	0	0	0	0	0	0	0	0	0	0	0	0	0	40	0	0	0	0	0	0	0	0	0	0	1
156581	k__Bacteria	p__Firmicutes	c__Clostridia	o__Clostridiales	f__Eubacteriaceae	g__Acetobacterium	s__unclassified	number.1 gg_id:00000 some annotation	0	0	0	0	0	0	0	0	0	0	0	0	0	0	0	0	0	0	0	0	0	0	0	0	0	0	0	0	0	0	0	0	0	0	0	0	0	0	0	0	0
41720	k__Bacteria	p__Proteobacteria	c__Gammaproteobacteria	o__Xanthomonadales	f__Xanthomonadaceae	g__Pseudoxanthomonas	s__Pseudoxanthomonas_mexicana	number.1 gg_id:00000 some annotation	0	0	0	0	0	0	0	0	0	0	0	0	0	0	0	0	0	0	0	0	0	0	1	0	0	0	0	0	0	0	0	0	0	0	0	0	0	0	0	0	0
106565	k__Bacteria	p__Bacteroidetes	c__Bacteroidia	o__Bacteroidales	f__Prevotellaceae	g__Prevotella	s__Prevotella_intermedia	number.1 gg_id:00000 some annotation	0	0	0	0	0	1	1	0	0	1	0	0	0	754	0	0	0	0	0	3736	0	197	82	0	0	0	0	0	32	1	0	0	0	0	374	0	5	0	0	0	0
561594	k__Bacteria	p__Firmicutes	c__Bacilli	o__Lactobacillales	f__unclassified	g__unclassified	s__unclassified	number.1 gg_id:00000 some annotation	0	0	0	2	0	1	0	1	0	0	0	1	1	0	0	3	0	0	0	0	0	0	0	1	2	0	0	0	0	0	0	1	0	0	1	0	0	0	1	1	0
553336	k__Bacteria	p__Firmicutes	c__Clostridia	o__Clostridiales	f__Lachnospiraceae	g__Oribacterium	s__unclassified	number.1 gg_id:00000 some annotation	0	0	0	0	0	0	0	0	0	0	0	0	0	0	0	0	0	0	14	37	26	0	0	0	0	0	0	0	0	0	0	0	0	0	3	2	0	0	0	0	0
288134	k__Bacteria	p__Firmicutes	c__Clostridia	o__Clostridiales	f__Lachnospiraceae	g__Eubacterium	s__unclassified	number.1 gg_id:00000 some annotation	0	0	0	0	0	0	0	0	0	0	0	0	0	0	0	0	0	0	0	0	0	0	0	0	0	0	0	0	0	2	0	0	0	0	0	0	0	0	0	0	0
156101	k__Bacteria	p__Proteobacteria	c__Betaproteobacteria	o__Burkholderiales	f__unclassified	g__unclassified	s__unclassified	number.1 gg_id:00000 some annotation	0	0	0	0	0	0	0	0	0	1	0	0	0	0	0	0	0	0	0	0	0	0	0	0	0	0	0	0	0	0	0	0	0	0	0	0	0	0	0	0	0
322235	k__Bacteria	p__Bacteroidetes	c__Bacteroidia	o__Bacteroidales	f__Bacteroidaceae	g__Bacteroides	s__Bacteroides_uniformis	number.1 gg_id:00000 some annotation	0	0	0	0	0	0	0	0	0	0	0	0	0	0	0	0	1	0	0	0	0	0	0	0	0	0	0	0	0	0	1	0	0	2	1	0	0	0	0	0	0
352654	k__Bacteria	p__Planctomycetes	c__Planctomycea	o__Planctomycetales	f__Planctomycetaceae	g__Rhodopirellula	s__unclassified	number.1 gg_id:00000 some annotation	0	0	0	0	0	0	0	0	0	0	0	0	0	0	0	0	0	0	0	0	0	0	0	0	0	0	0	0	0	0	0	0	0	0	0	0	0	0	0	0	0
234912	k__Bacteria	p__Firmicutes	c__Clostridia	o__Clostridiales	f__unclassified	g__unclassified	s__unclassified	number.1 gg_id:00000 some annotation	0	0	0	0	0	0	0	0	0	0	0	0	0	0	0	0	0	0	0	0	0	0	0	0	0	0	0	0	0	0	0	0	0	0	0	0	0	0	0	0	0
83306	k__Bacteria	p__Actinobacteria	c__Actinobacteria	o__Actinomycetales	f__Microbacteriaceae	g__unclassified	s__unclassified	number.1 gg_id:00000 some annotation	0	0	0	0	0	0	0	0	0	0	0	0	0	0	0	0	0	0	0	0	0	0	0	0	0	0	0	0	0	0	0	0	0	0	0	0	0	0	0	0	0
179964	k__Bacteria	p__Firmicutes	c__Clostridia	o__Clostridiales	f__Lachnospiraceae	g__unclassified	s__unclassified	number.1 gg_id:00000 some annotation	0	0	0	0	0	0	0	0	1	0	0	0	0	0	0	0	0	0	0	0	0	0	0	0	0	0	0	0	0	0	0	0	0	0	0	0	0	0	0	0	0
287241	k__Bacteria	p__Proteobacteria	c__Betaproteobacteria	o__Burkholderiales	f__Oxalobacteraceae	g__unclassified	s__unclassified	number.1 gg_id:00000 some annotation	0	0	0	0	0	0	1	0	0	1	0	0	0	0	0	0	0	0	0	0	0	0	0	0	0	0	0	0	0	0	0	0	0	0	0	0	0	0	0	0	1
6932	k__Bacteria	p__Proteobacteria	c__Betaproteobacteria	o__Burkholderiales	f__Comamonadaceae	g__unclassified	s__unclassified	number.1 gg_id:00000 some annotation	0	0	0	0	0	0	0	0	0	0	0	0	0	0	0	0	0	0	0	0	0	1	0	0	0	0	0	0	0	0	0	0	0	0	0	0	0	0	0	0	0
170131	k__Bacteria	p__Firmicutes	c__Clostridia	o__Clostridiales	f__Lachnospiraceae	g__unclassified	s__unclassified	number.1 gg_id:00000 some annotation	0	0	0	0	0	0	0	0	0	0	0	0	0	0	0	0	0	0	0	0	0	0	0	0	0	0	0	0	0	0	0	0	0	0	0	0	0	0	0	0	0
133961	k__Bacteria	p__Proteobacteria	c__Gammaproteobacteria	o__Pseudomonadales	f__Pseudomonadaceae	g__Pseudomonas	s__unclassified	number.1 gg_id:00000 some annotation	0	0	1	0	0	0	0	0	0	0	0	0	0	0	0	0	0	0	0	0	0	1	0	0	0	2	0	0	0	3	0	0	0	0	0	0	0	2	0	0	0
67810	k__Bacteria	p__Firmicutes	c__Bacilli	o__Lactobacillales	f__Enterococcaceae	g__unclassified	s__unclassified	number.1 gg_id:00000 some annotation	0	0	0	0	0	0	0	0	0	0	0	0	0	0	0	1	0	0	0	0	0	0	0	0	0	0	0	0	0	0	0	0	0	0	0	0	0	0	0	0	0
177214	k__Bacteria	p__Firmicutes	c__Clostridia	o__Clostridiales	f__Lachnospiraceae	g__Blautia	s__unclassified	number.1 gg_id:00000 some annotation	0	0	0	0	0	0	0	0	0	0	0	0	0	0	0	0	0	0	0	0	0	0	0	0	0	0	0	0	0	1	0	0	0	0	0	0	0	0	0	0	0
173277	k__Bacteria	p__Firmicutes	c__Clostridia	o__Clostridiales	f__Lachnospiraceae	g__unclassified	s__unclassified	number.1 gg_id:00000 some annotation	0	0	0	0	0	0	0	0	13	0	0	0	0	0	0	0	0	0	0	0	0	0	0	0	0	0	0	0	0	0	0	0	0	0	0	0	0	0	0	0	0
92131	k__Bacteria	p__Fusobacteria	c__Fusobacteria	o__Fusobacteriales	f__Fusobacteriaceae	g__Leptotrichia	s__unclassified	number.1 gg_id:00000 some annotation	0	0	0	0	0	0	0	0	0	0	0	0	0	1	0	0	19	3	0	0	0	0	0	1	0	1	0	0	0	0	0	0	7	0	1	7	0	0	0	0	1
230114	k__Bacteria	p__Firmicutes	c__Bacilli	o__unclassified	f__unclassified	g__unclassified	s__unclassified	number.1 gg_id:00000 some annotation	0	0	0	0	0	0	0	0	0	0	0	1	0	0	0	0	0	0	0	0	0	0	0	0	1	0	0	0	0	0	0	0	0	0	0	0	0	0	0	0	0
229755	k__Bacteria	p__Firmicutes	c__Clostridia	o__Clostridiales	f__Lachnospiraceae	g__unclassified	s__unclassified	number.1 gg_id:00000 some annotation	0	0	0	0	0	0	0	0	0	0	0	0	0	0	0	0	0	0	0	0	0	0	0	0	0	0	0	0	0	0	0	0	0	0	0	0	0	0	0	0	0
23149	k__Bacteria	p__Actinobacteria	c__Actinobacteria	o__Actinomycetales	f__Actinomycetaceae	g__Actinomyces	s__unclassified	number.1 gg_id:00000 some annotation	0	0	0	0	0	0	0	0	0	0	0	0	0	0	0	0	0	0	0	0	0	0	1	0	0	0	0	0	0	0	0	0	0	0	0	0	0	0	0	0	0
114821	k__Bacteria	p__Firmicutes	c__Clostridia	o__Clostridiales	f__Veillonellaceae	g__Veillonella	s__Veillonella_parvula	number.1 gg_id:00000 some annotation	4009	254	133	1835	129	82	378	2559	1128	530	291	185	297	362	477	942	1549	26	12	1	106	1	498	56	455	53	10	22	60	0	483	3	45	2	798	240	407	367	97	32	251
72586	k__Bacteria	p__Bacteroidetes	c__Bacteroidia	o__Bacteroidales	f__Porphyromonadaceae	g__Porphyromonas	s__unclassified	number.1 gg_id:00000 some annotation	0	0	0	0	0	0	0	0	0	0	0	0	0	0	0	0	0	0	0	0	0	0	0	0	0	0	0	0	0	0	0	1	0	0	0	0	0	0	0	0	0
296041	k__Bacteria	p__Firmicutes	c__Clostridia	o__Clostridiales	f__Lachnospiraceae	g__Clostridium	s__unclassified	number.1 gg_id:00000 some annotation	0	0	0	0	0	0	0	0	0	0	0	0	0	0	0	0	0	0	0	0	0	0	0	0	0	0	0	0	0	0	0	0	0	0	0	0	0	0	0	0	0
228975	k__Bacteria	p__Firmicutes	c__Clostridia	o__Clostridiales	f__Ruminococcaceae	g__unclassified	s__unclassified	number.1 gg_id:00000 some annotation	0	0	0	0	0	0	0	0	13	0	0	0	0	0	0	0	0	0	0	0	0	0	0	0	0	0	0	0	0	0	0	0	0	0	0	0	0	0	0	0	0
320879	k__Bacteria	p__Actinobacteria	c__Actinobacteria	o__Actinomycetales	f__Corynebacteriaceae	g__unclassified	s__unclassified	number.1 gg_id:00000 some annotation	0	1	1	0	0	0	0	0	13	0	0	0	0	1	0	2	0	0	1	0	0	0	0	0	0	2	0	1	0	0	0	0	0	151	0	0	0	0	0	0	0
192890	k__Bacteria	p__Proteobacteria	c__Gammaproteobacteria	o__Xanthomonadales	f__Xanthomonadaceae	g__Luteibacter	s__unclassified	number.1 gg_id:00000 some annotation	0	0	0	0	0	0	0	0	0	0	1	0	0	0	0	0	0	0	0	0	0	0	0	0	0	0	0	0	0	0	0	0	0	0	0	0	0	0	0	0	0
103229	k__Bacteria	p__Bacteroidetes	c__Flavobacteria	o__Flavobacteriales	f__Cryomorphaceae	g__unclassified	s__unclassified	number.1 gg_id:00000 some annotation	0	0	0	0	0	0	1	0	0	0	0	0	0	0	0	0	0	0	0	0	0	0	0	0	0	1	0	0	0	0	0	0	0	0	0	0	0	0	0	0	0
12567	k__Bacteria	p__Actinobacteria	c__Actinobacteria	o__Actinomycetales	f__Actinomycetaceae	g__Actinomyces	s__unclassified	number.1 gg_id:00000 some annotation	0	0	0	0	0	0	0	0	0	0	0	0	0	0	0	0	0	0	0	0	0	1	0	0	0	0	0	0	0	0	0	0	0	0	0	0	0	0	0	0	0
234041	k__Bacteria	p__Gemmatimonadetes	c__Gemmatimonadetes	o__Gemmatimonadales	f__Gemmatimonadaceae	g__Gemmatimonas	s__unclassified	number.1 gg_id:00000 some annotation	0	1	0	0	0	0	0	0	3	0	0	0	0	0	0	0	0	0	0	0	0	0	0	0	0	0	0	0	0	0	0	0	0	0	0	0	0	0	0	0	0
241713	k__Bacteria	p__Proteobacteria	c__Gammaproteobacteria	o__Xanthomonadales	f__Xanthomonadaceae	g__unclassified	s__unclassified	number.1 gg_id:00000 some annotation	0	0	0	0	0	1	0	0	0	0	0	0	0	0	0	0	0	0	0	0	0	0	0	0	0	0	0	0	0	0	0	0	0	0	0	0	0	0	0	0	0
261774	k__Bacteria	p__Actinobacteria	c__Actinobacteria	o__Actinomycetales	f__Corynebacteriaceae	g__Corynebacterium	s__unclassified	number.1 gg_id:00000 some annotation	0	0	0	0	0	0	0	0	0	0	0	0	0	1	0	0	0	0	0	0	0	0	0	0	0	0	0	1	0	0	0	0	0	0	0	0	0	0	0	0	0
145094	k__Bacteria	p__Bacteroidetes	c__Flavobacteria	o__Flavobacteriales	f__Flavobacteriaceae	g__Chryseobacterium	s__unclassified	number.1 gg_id:00000 some annotation	0	0	0	0	0	0	0	1	0	0	0	0	0	0	0	0	0	0	0	0	0	0	0	0	0	0	0	0	0	0	0	0	0	0	0	0	0	0	0	0	0
266413	k__Bacteria	p__Firmicutes	c__Clostridia	o__Clostridiales	f__Lachnospiraceae	g__unclassified	s__unclassified	number.1 gg_id:00000 some annotation	0	0	0	0	0	0	0	0	15	0	0	0	0	0	0	0	0	0	0	0	0	0	0	0	0	0	0	0	0	0	0	0	0	0	0	0	0	0	0	0	0
12620	k__Bacteria	p__Actinobacteria	c__Actinobacteria	o__Bifidobacteriales	f__Bifidobacteriaceae	g__unclassified	s__unclassified	number.1 gg_id:00000 some annotation	0	0	0	0	0	0	0	0	0	0	0	1	0	0	0	0	0	0	0	0	0	0	0	0	0	0	0	0	0	0	0	0	0	0	0	0	0	0	0	0	0
267439	k__Bacteria	p__Proteobacteria	c__Alphaproteobacteria	o__Sphingomonadales	f__Sphingomonadaceae	g__unclassified	s__unclassified	number.1 gg_id:00000 some annotation	0	0	1	0	0	0	0	0	0	0	0	0	0	0	0	0	0	0	0	0	0	0	0	0	0	0	0	0	1	0	0	0	0	0	0	0	0	0	0	0	0
354737	k__Bacteria	p__Firmicutes	c__Clostridia	o__Clostridiales	f__Ruminococcaceae	g__Subdoligranulum	s__unclassified	number.1 gg_id:00000 some annotation	0	0	0	0	0	0	0	0	0	0	0	0	0	0	0	0	0	0	0	0	0	0	0	0	0	0	0	0	0	0	0	0	0	1	0	0	0	0	0	0	0
43739	k__Bacteria	p__Firmicutes	c__Clostridia	o__Clostridiales	f__Veillonellaceae	g__Anaeroglobus	s__unclassified	number.1 gg_id:00000 some annotation	0	0	0	0	0	0	0	0	0	0	0	1	3	2	2	88	0	2	2	9	0	0	0	0	0	0	0	0	0	0	0	0	0	0	53	0	0	0	1	0	10
207570	k__Bacteria	p__Firmicutes	c__Clostridia	o__Clostridiales	f__unclassified	g__unclassified	s__unclassified	number.1 gg_id:00000 some annotation	0	0	0	0	0	0	0	0	0	0	0	0	0	0	0	0	0	0	0	0	0	0	0	0	0	0	0	0	0	0	0	0	0	0	0	0	0	0	0	0	0
34466	k__Bacteria	p__Firmicutes	c__Clostridia	o__Clostridiales	f__Lachnospiraceae	g__Johnsonella	s__unclassified	number.1 gg_id:00000 some annotation	0	0	0	0	0	0	0	0	0	0	0	0	0	0	0	0	0	0	0	55	0	0	0	0	0	0	0	0	0	0	0	0	0	0	1	0	0	0	0	0	0
181331	k__Bacteria	p__Firmicutes	c__Clostridia	o__Clostridiales	f__Lachnospiraceae	g__unclassified	s__unclassified	number.1 gg_id:00000 some annotation	0	0	0	0	0	0	0	0	1	0	0	0	0	0	0	0	0	0	0	0	0	0	0	0	0	0	0	0	0	0	0	0	0	0	0	0	0	0	0	0	0
307080	k__Bacteria	p__Proteobacteria	c__Gammaproteobacteria	o__Enterobacteriales	f__Enterobacteriaceae	g__unclassified	s__unclassified	number.1 gg_id:00000 some annotation	0	0	0	0	0	0	0	0	0	0	0	0	0	0	0	0	0	0	0	0	0	0	0	0	0	0	0	0	0	2	0	0	0	0	0	0	0	0	0	0	0
379762	k__Bacteria	p__Firmicutes	c__Clostridia	o__Clostridiales	f__Ruminococcaceae	g__unclassified	s__unclassified	number.1 gg_id:00000 some annotation	0	0	0	0	0	0	0	0	14	0	0	0	0	0	0	0	0	0	0	0	0	0	0	0	0	0	0	0	0	0	0	0	0	0	0	0	0	0	0	0	0
158223	k__Bacteria	p__Proteobacteria	c__Gammaproteobacteria	o__Pseudomonadales	f__Moraxellaceae	g__Alkanindiges	s__unclassified	number.1 gg_id:00000 some annotation	0	0	0	0	0	0	0	0	0	0	0	0	0	0	0	0	0	0	0	0	0	0	0	0	0	0	0	0	0	0	0	0	0	0	0	0	0	0	0	0	0
247720	k__Bacteria	p__Actinobacteria	c__Actinobacteria	o__Actinomycetales	f__Brevibacteriaceae	g__Brevibacterium	s__Brevibacterium_paucivorans	number.1 gg_id:00000 some annotation	0	0	0	0	0	0	0	0	0	0	0	0	0	0	0	0	0	0	0	0	0	0	0	0	0	0	0	0	0	0	0	0	0	0	0	0	0	0	0	0	0
576765	k__Bacteria	p__Proteobacteria	c__Alphaproteobacteria	o__Caulobacterales	f__Caulobacteraceae	g__Brevundimonas	s__unclassified	number.1 gg_id:00000 some annotation	0	0	0	0	0	0	0	0	0	1	0	1	0	0	1	0	0	0	0	0	0	0	1	1	0	0	0	0	0	258	2	0	0	261	0	0	0	0	0	0	0
196191	k__Bacteria	p__Firmicutes	c__Clostridia	o__Clostridiales	f__Ruminococcaceae	g__unclassified	s__unclassified	number.1 gg_id:00000 some annotation	0	0	0	0	0	0	0	0	8	0	0	0	0	0	0	0	0	0	0	0	0	0	0	0	0	0	0	0	0	0	0	0	0	0	0	0	0	0	0	0	0
503327	k__Bacteria	p__Actinobacteria	c__Actinobacteria	o__Actinomycetales	f__Corynebacteriaceae	g__Corynebacterium	s__unclassified	number.1 gg_id:00000 some annotation	0	0	0	0	0	0	0	0	0	0	0	0	0	0	0	0	0	0	0	0	0	0	0	0	0	0	0	0	0	0	0	0	0	0	0	0	0	0	0	0	0
309068	k__Bacteria	p__Bacteroidetes	c__Bacteroidia	o__Bacteroidales	f__Prevotellaceae	g__Prevotella	s__unclassified	number.1 gg_id:00000 some annotation	0	0	0	0	0	0	0	0	0	0	0	0	0	0	0	0	0	0	0	0	1	0	0	0	0	0	0	0	0	0	0	0	0	0	0	0	0	0	0	0	0
579506	k__Bacteria	p__Bacteroidetes	c__Flavobacteria	o__Flavobacteriales	f__Flavobacteriaceae	g__unclassified	s__unclassified	number.1 gg_id:00000 some annotation	0	2	14	0	26	6	12	9	39	5	6	3	3	5	1	17	23	0	0	1	0	1680	5	0	0	17	0	0	115	0	3	0	0	0	0	0	0	1	0	0	9
215086	k__Bacteria	p__Firmicutes	c__Clostridia	o__Clostridiales	f__Catabacteriaceae	g__unclassified	s__unclassified	number.1 gg_id:00000 some annotation	0	0	0	0	0	0	0	0	0	0	0	0	0	0	0	0	0	0	0	0	0	0	0	0	0	0	0	0	0	0	0	0	0	0	0	0	0	0	0	0	0
246528	k__Bacteria	p__Proteobacteria	c__Gammaproteobacteria	o__Pseudomonadales	f__Moraxellaceae	g__Moraxella	s__unclassified	number.1 gg_id:00000 some annotation	0	0	0	0	0	0	0	0	0	0	0	0	0	0	0	0	0	0	0	0	0	0	0	0	0	0	0	0	0	0	0	0	0	0	2	0	0	0	0	0	0
64396	k__Bacteria	p__Fusobacteria	c__Fusobacteria	o__Fusobacteriales	f__Fusobacteriaceae	g__Fusobacterium	s__unclassified	number.1 gg_id:00000 some annotation	1363	57	373	1204	600	20	848	655	166	1086	3073	328	1223	590	405	2187	487	6775	9961	6696	2875	2101	2841	2274	503	462	14760	689	265	5	3474	8347	530	2	1526	88	2641	1184	195	14	3385
523561	k__Bacteria	p__Chloroflexi	c__Thermomicrobia	o__Sphaerobacterales	f__Sphaerobacterineae	g__HN1-15	s__unclassified	number.1 gg_id:00000 some annotation	0	0	0	0	0	0	0	0	0	0	0	0	0	0	0	0	0	0	0	0	0	0	0	0	0	0	0	0	0	0	0	0	0	0	0	0	0	0	0	0	0
236512	k__Bacteria	p__Spirochaetes	c__Spirochaetes	o__Spirochaetales	f__Spirochaetaceae	g__Treponema	s__Treponema_medium	number.1 gg_id:00000 some annotation	0	0	0	0	0	0	0	0	0	0	0	7	12	25	5	0	0	0	1	634	468	0	0	0	0	0	0	0	0	0	0	0	1	0	16	20	0	0	0	0	0
439457	k__Bacteria	p__Firmicutes	c__Bacilli	o__Thermicanales	f__Thermicanaceae	g__Thermicanus	s__unclassified	number.1 gg_id:00000 some annotation	0	0	0	0	0	0	0	0	0	0	0	1	0	0	0	0	0	0	0	0	0	0	0	0	0	0	0	0	0	0	0	0	0	0	0	0	0	0	0	0	0
215248	k__Bacteria	p__Actinobacteria	c__Actinobacteria	o__Actinomycetales	f__Actinomycetaceae	g__unclassified	s__unclassified	number.1 gg_id:00000 some annotation	0	0	1	0	2	1	0	0	0	0	0	0	0	0	0	0	0	0	0	0	0	0	0	0	0	0	0	0	0	0	0	0	0	0	0	0	0	0	0	0	0
314110	k__Bacteria	p__Firmicutes	c__Clostridia	o__Clostridiales	f__Lachnospiraceae	g__unclassified	s__unclassified	number.1 gg_id:00000 some annotation	0	0	0	0	0	0	0	0	3	0	0	0	0	0	0	0	0	0	0	0	0	0	0	0	0	0	0	0	0	0	0	0	0	0	0	0	0	0	0	0	0
101374	k__Bacteria	p__Proteobacteria	c__Gammaproteobacteria	o__Xanthomonadales	f__Xanthomonadaceae	g__unclassified	s__unclassified	number.1 gg_id:00000 some annotation	0	0	0	0	0	0	0	0	4	0	0	0	0	0	0	0	0	0	0	0	0	0	0	0	0	0	0	0	0	0	0	0	0	0	0	0	0	0	0	0	0
311724	k__Bacteria	p__Firmicutes	c__Clostridia	o__Clostridiales	f__Lachnospiraceae	g__Clostridium	s__unclassified	number.1 gg_id:00000 some annotation	0	0	0	0	0	0	0	0	0	0	0	0	0	0	0	0	0	0	0	0	1	0	0	0	0	0	0	0	0	0	0	0	0	0	0	0	0	0	0	0	0
337173	k__Bacteria	p__Proteobacteria	c__Betaproteobacteria	o__Burkholderiales	f__Comamonadaceae	g__unclassified	s__unclassified	number.1 gg_id:00000 some annotation	0	0	0	0	0	0	0	0	2	0	1	0	0	0	0	0	1	0	0	0	0	13	0	0	0	0	0	0	0	0	0	0	0	0	0	0	0	0	0	0	0
4663	k__Bacteria	p__Proteobacteria	c__Alphaproteobacteria	o__Rhizobiales	f__Xanthobacteraceae	g__Xanthobacter	s__Xanthobacter_flavus	number.1 gg_id:00000 some annotation	0	0	0	0	0	0	0	0	0	0	0	0	0	0	0	0	0	0	0	0	0	0	0	0	0	0	0	0	0	0	0	0	0	0	0	0	0	0	0	0	0
545997	k__Bacteria	p__Proteobacteria	c__Betaproteobacteria	o__Burkholderiales	f__Comamonadaceae	g__unclassified	s__unclassified	number.1 gg_id:00000 some annotation	0	0	0	0	0	0	0	0	0	0	0	0	0	0	0	0	0	0	0	0	0	0	0	0	0	0	0	0	0	0	0	0	0	0	0	0	0	0	0	0	0
206367	k__Bacteria	p__Bacteroidetes	c__Bacteroidia	o__Bacteroidales	f__RikenellaceaeII	g__unclassified	s__unclassified	number.1 gg_id:00000 some annotation	0	0	0	0	0	0	0	0	0	0	0	0	0	0	0	0	0	0	0	0	0	0	0	0	0	0	0	0	0	0	0	0	0	0	0	0	0	0	0	0	0
323791	k__Bacteria	p__Proteobacteria	c__Alphaproteobacteria	o__Rhizobiales	f__Rhizobiaceae	g__unclassified	s__unclassified	number.1 gg_id:00000 some annotation	0	0	0	0	0	0	0	0	0	0	0	0	0	0	0	0	0	0	0	0	0	0	0	0	0	0	0	0	0	0	0	0	0	0	0	0	0	0	0	0	0
544910	k__Bacteria	p__Actinobacteria	c__Actinobacteria	o__Actinomycetales	f__Corynebacteriaceae	g__Corynebacterium	s__unclassified	number.1 gg_id:00000 some annotation	0	0	0	0	2	0	0	0	0	0	0	0	0	0	0	0	0	0	0	0	0	58	0	0	0	0	0	0	0	0	0	0	0	0	0	0	0	0	0	0	0
367453	k__Bacteria	p__Firmicutes	c__Clostridia	o__Clostridiales	f__Lachnospiraceae	g__Coprococcus	s__unclassified	number.1 gg_id:00000 some annotation	0	0	0	0	0	0	0	0	0	0	0	0	0	0	0	0	0	0	0	0	0	0	0	0	0	0	0	0	0	1	0	0	0	0	0	0	0	0	0	0	0
344901	k__Bacteria	p__Bacteroidetes	c__Bacteroidia	o__Bacteroidales	f__RikenellaceaeII	g__unclassified	s__unclassified	number.1 gg_id:00000 some annotation	0	0	0	0	0	0	0	0	0	0	0	0	0	0	0	0	0	0	0	0	0	0	0	0	0	0	0	0	0	0	0	0	0	0	0	0	0	0	0	1	0
236285	k__Bacteria	p__Proteobacteria	c__Gammaproteobacteria	o__Enterobacteriales	f__Enterobacteriaceae	g__unclassified	s__unclassified	number.1 gg_id:00000 some annotation	0	0	0	0	0	0	0	0	0	0	0	0	0	0	0	1	0	0	0	0	0	0	0	0	0	0	0	0	0	0	0	0	0	0	0	0	0	0	0	0	0
363923	k__Bacteria	p__Firmicutes	c__Clostridia	o__Clostridiales	f__Ruminococcaceae	g__Ruminococcus	s__Ruminococcus_bromii	number.1 gg_id:00000 some annotation	0	0	0	0	0	0	0	0	0	0	0	0	0	0	0	0	0	0	0	0	0	1	0	0	0	0	0	0	0	0	0	0	0	0	0	0	0	0	0	0	0
90210	k__Bacteria	p__Proteobacteria	c__Alphaproteobacteria	o__Rickettsiales	f__Holosporaceae	g__unclassified	s__unclassified	number.1 gg_id:00000 some annotation	0	0	0	0	0	0	0	0	0	0	0	0	0	0	0	0	0	0	0	0	0	0	0	0	0	0	0	0	0	0	0	0	0	0	0	0	0	0	0	0	0
9062	k__Bacteria	p__Proteobacteria	c__Gammaproteobacteria	o__Alteromonadales	f__Shewanellaceae	g__Shewanella	s__unclassified	number.1 gg_id:00000 some annotation	0	0	0	0	0	0	0	0	0	0	0	0	0	0	0	0	0	0	0	0	0	0	0	0	0	0	0	0	0	0	0	0	0	0	0	0	0	0	0	0	0
582407	k__Bacteria	p__Proteobacteria	c__Betaproteobacteria	o__Burkholderiales	f__Comamonadaceae	g__unclassified	s__unclassified	number.1 gg_id:00000 some annotation	0	0	0	0	3	0	0	0	0	0	0	0	0	0	0	0	0	0	0	0	0	0	0	0	0	0	0	0	0	0	0	0	0	0	0	0	0	0	0	0	3
363731	k__Bacteria	p__Verrucomicrobia	c__Verrucomicrobiae	o__Verrucomicrobiales	f__Verrucomicrobiaceae	g__Akkermansia	s__Akkermansia_muciniphila	number.1 gg_id:00000 some annotation	0	0	0	0	0	0	0	0	0	0	0	0	0	0	0	0	0	0	0	0	0	0	0	0	0	0	0	0	0	0	0	0	0	0	0	0	0	0	0	0	0
509440	k__Bacteria	p__Proteobacteria	c__Deltaproteobacteria	o__MIZ46	f__unclassified	g__unclassified	s__unclassified	number.1 gg_id:00000 some annotation	0	0	0	0	0	0	0	0	1	0	0	0	0	0	0	0	0	0	0	0	0	0	0	0	0	0	0	0	0	0	0	0	0	0	0	0	0	0	0	0	0
411142	k__Bacteria	p__Proteobacteria	c__Gammaproteobacteria	o__Pseudomonadales	f__Pseudomonadaceae	g__Pseudomonas	s__Pseudomonas_mandelii	number.1 gg_id:00000 some annotation	0	0	0	0	0	0	0	0	12	7	3	8	0	0	1	0	1	0	0	0	1	0	8	0	1	6	0	1	5	1063	1	0	0	3414	1	1	0	26	0	0	0
186029	k__Bacteria	p__Actinobacteria	c__Actinobacteria	o__Coriobacteriales	f__Coriobacteriaceae	g__Collinsella	s__Collinsella_aerofaciens	number.1 gg_id:00000 some annotation	0	0	0	0	0	0	0	0	0	0	0	0	0	0	0	0	0	0	0	0	0	0	0	0	0	0	0	0	0	62	0	0	0	97	0	0	0	0	0	0	0
10113	k__Bacteria	p__Proteobacteria	c__Gammaproteobacteria	o__Enterobacteriales	f__Enterobacteriaceae	g__unclassified	s__unclassified	number.1 gg_id:00000 some annotation	0	0	0	0	0	0	0	0	0	0	0	0	0	0	0	0	0	0	0	0	0	0	0	0	0	0	0	0	1	0	0	0	0	0	0	0	0	0	0	0	0
225088	k__Bacteria	p__Proteobacteria	c__Gammaproteobacteria	o__Pseudomonadales	f__Pseudomonadaceae	g__Pseudomonas	s__unclassified	number.1 gg_id:00000 some annotation	0	0	0	0	0	0	0	0	0	0	0	0	0	0	0	0	0	0	0	0	0	0	0	0	0	0	0	0	0	0	0	0	0	0	0	0	0	0	0	0	0
176637	k__Bacteria	p__Bacteroidetes	c__Bacteroidia	o__Bacteroidales	f__RikenellaceaeII	g__unclassified	s__unclassified	number.1 gg_id:00000 some annotation	0	0	0	0	0	0	0	1	127	0	2	0	0	0	1	0	0	0	0	0	0	144	0	0	0	0	0	0	0	0	0	0	0	100	0	1	0	0	0	0	0
549871	k__Bacteria	p__Firmicutes	c__Clostridia	o__Clostridiales	f__Lachnospiraceae	g__unclassified	s__unclassified	number.1 gg_id:00000 some annotation	0	0	0	0	0	0	0	0	14	1	0	0	0	0	0	0	0	0	0	0	0	0	0	0	0	0	0	0	0	0	0	0	0	0	0	0	0	0	0	0	0
63123	k__Bacteria	p__Bacteroidetes	c__Bacteroidia	o__Bacteroidales	f__Prevotellaceae	g__Prevotella	s__Prevotella_pallens	number.1 gg_id:00000 some annotation	5	0	8	0	0	0	0	0	0	0	0	0	0	0	0	5	0	20	0	2	0	0	0	0	0	0	0	0	1	0	0	0	0	0	11	0	0	0	0	0	0
253214	k__Bacteria	p__Proteobacteria	c__Alphaproteobacteria	o__Rhizobiales	f__Brucellaceae	g__unclassified	s__unclassified	number.1 gg_id:00000 some annotation	0	0	0	0	0	0	0	0	0	0	0	0	0	0	0	0	0	0	0	0	0	118	0	0	0	0	0	0	0	0	0	0	0	0	0	0	0	0	0	0	0
209111	k__Bacteria	p__Firmicutes	c__Clostridia	o__Clostridiales	f__Lachnospiraceae	g__unclassified	s__unclassified	number.1 gg_id:00000 some annotation	0	0	0	0	0	0	0	0	139	0	0	0	0	0	0	0	0	0	0	0	0	0	0	0	0	0	0	0	0	0	0	0	0	0	0	0	0	0	0	0	0
13393	k__Bacteria	p__Actinobacteria	c__Actinobacteria	o__Actinomycetales	f__Corynebacteriaceae	g__Corynebacterium	s__unclassified	number.1 gg_id:00000 some annotation	0	0	0	0	0	0	0	0	0	0	0	0	0	0	0	0	0	0	0	0	0	0	0	0	0	0	0	0	0	0	0	0	0	0	0	0	0	0	0	0	0
470693	k__Bacteria	p__Actinobacteria	c__Actinobacteria	o__Actinomycetales	f__Actinomycetaceae	g__Mobiluncus	s__Mobiluncus_mulieris	number.1 gg_id:00000 some annotation	0	0	0	0	0	0	0	0	0	0	0	0	0	0	0	0	0	0	0	1	0	0	0	0	0	0	0	0	0	0	0	0	0	0	1	0	0	0	0	0	0
321316	k__Bacteria	p__Actinobacteria	c__Actinobacteria	o__Actinomycetales	f__Intrasporangiaceae	g__unclassified	s__unclassified	number.1 gg_id:00000 some annotation	0	0	0	0	0	0	0	0	0	0	0	0	0	0	0	0	0	0	0	0	0	0	0	0	0	0	0	0	0	0	0	0	0	1	0	0	0	0	0	0	0
142054	k__Bacteria	p__Proteobacteria	c__Gammaproteobacteria	o__Enterobacteriales	f__Enterobacteriaceae	g__unclassified	s__unclassified	number.1 gg_id:00000 some annotation	0	0	0	0	0	0	0	0	0	0	0	0	0	0	0	0	0	0	0	0	0	2	0	0	0	0	0	0	0	1	0	0	0	1	0	0	0	0	0	0	0
470273	k__Bacteria	p__Actinobacteria	c__Actinobacteria	o__Actinomycetales	f__Actinomycetaceae	g__Actinomyces	s__Actinomyces_sp._oral_taxon_848	number.1 gg_id:00000 some annotation	0	0	0	0	0	0	0	1	5	0	0	0	9	0	0	0	1	0	0	0	2	0	0	0	0	0	0	1	0	0	0	0	0	0	4	0	0	0	0	0	4
255669	k__Bacteria	p__Firmicutes	c__Clostridia	o__Clostridiales	f__Lachnospiraceae	g__unclassified	s__unclassified	number.1 gg_id:00000 some annotation	1	0	0	3	0	0	9	0	0	5	0	0	7	8	0	0	3	2	0	2	0	0	0	0	0	0	16	0	0	0	0	0	22	0	9	0	0	0	0	0	44
217901	k__Bacteria	p__Tenericutes	c__Mollicutes	o__Mycoplasmatales	f__Mycoplasmataceae	g__Mycoplasma	s__unclassified	number.1 gg_id:00000 some annotation	0	0	0	0	0	0	0	0	0	0	21	1	4	2	4	8	0	0	12	0	0	0	0	0	0	0	0	0	1	0	0	0	0	0	0	0	0	0	0	0	12
591496	k__Bacteria	p__Firmicutes	c__Clostridia	o__Clostridiales	f__Clostridiaceae	g__Clostridium	s__Clostridium_butyricum	number.1 gg_id:00000 some annotation	0	0	0	0	0	0	0	0	0	0	0	0	0	0	0	0	0	0	0	0	0	0	0	0	0	0	0	0	0	0	0	0	0	0	0	0	0	0	0	0	0
553047	k__Bacteria	p__Proteobacteria	c__Betaproteobacteria	o__Burkholderiales	f__Comamonadaceae	g__unclassified	s__unclassified	number.1 gg_id:00000 some annotation	0	0	0	0	0	0	0	0	0	0	0	0	0	0	0	0	0	0	0	0	0	2	0	0	0	0	0	0	0	0	0	0	0	0	0	0	0	0	0	0	0
329096	k__Bacteria	p__Proteobacteria	c__Gammaproteobacteria	o__Enterobacteriales	f__Enterobacteriaceae	g__Escherichia	s__unclassified	number.1 gg_id:00000 some annotation	0	0	0	0	0	0	0	0	0	0	0	0	0	0	0	0	0	0	0	0	0	0	0	0	0	0	0	0	0	0	0	0	0	0	0	0	0	0	0	0	0
263630	k__Bacteria	p__Proteobacteria	c__Betaproteobacteria	o__Burkholderiales	f__Burkholderiaceae	g__Polynucleobacter	s__unclassified	number.1 gg_id:00000 some annotation	0	0	0	0	0	0	0	0	0	0	0	0	0	0	0	0	0	0	0	0	0	0	0	0	0	0	0	0	0	0	0	0	0	0	0	0	0	0	0	0	0
237550	k__Bacteria	p__Bacteroidetes	c__Sphingobacteria	o__Sphingobacteriales	f__Sphingobacteriaceae	g__Pedobacter	s__unclassified	number.1 gg_id:00000 some annotation	0	0	0	0	0	0	0	0	0	0	0	0	0	0	0	0	0	0	0	0	0	0	0	0	0	0	0	0	0	0	0	0	0	0	0	0	0	0	0	0	0
14290	k__Bacteria	p__Firmicutes	c__Clostridia	o__Clostridiales	f__Clostridiales_Family_XI._Incertae_Sedis	g__Anaerococcus	s__unclassified	number.1 gg_id:00000 some annotation	0	0	0	0	1	0	0	0	0	0	0	0	0	4	0	0	0	0	0	0	0	0	0	0	0	0	0	0	2	0	0	0	0	0	0	0	0	0	0	0	0
470477	k__Bacteria	p__Firmicutes	c__Bacilli	o__Lactobacillales	f__unclassified	g__unclassified	s__unclassified	number.1 gg_id:00000 some annotation	5	0	48	528	94	36	52	279	134	22	19	154	405	43	414	193	252	9	0	1	1	1	5	634	233	35	13	23	221	0	49	18	4	0	38	22	15	239	349	159	76
169479	k__Bacteria	p__Firmicutes	c__Clostridia	o__Clostridiales	f__Ruminococcaceae	g__Clostridium	s__Flavonifractor_plautii	number.1 gg_id:00000 some annotation	0	0	0	0	0	0	0	0	22	0	0	0	0	0	0	0	0	0	0	0	0	0	0	0	0	0	0	0	0	0	0	0	0	0	0	0	0	0	0	0	0
179407	k__Bacteria	p__Bacteroidetes	c__Sphingobacteria	o__Sphingobacteriales	f__Chitinophagaceae	g__unclassified	s__unclassified	number.1 gg_id:00000 some annotation	0	0	0	0	0	0	0	0	3	0	0	0	0	0	0	0	0	0	0	0	0	0	0	0	0	0	0	0	0	0	0	0	0	0	0	0	0	0	0	0	0
258995	k__Bacteria	p__Firmicutes	c__Clostridia	o__Clostridiales	f__Ruminococcaceae	g__Oscillospira	s__unclassified	number.1 gg_id:00000 some annotation	0	0	0	0	0	0	0	0	37	0	0	0	0	0	0	0	0	0	0	0	0	0	0	0	0	0	0	0	0	0	0	0	0	0	0	0	0	0	0	0	0
336844	k__Bacteria	p__Bacteroidetes	c__Bacteroidia	o__Bacteroidales	f__RikenellaceaeII	g__unclassified	s__unclassified	number.1 gg_id:00000 some annotation	0	0	0	0	0	0	0	0	0	0	0	0	0	0	0	0	0	0	0	0	0	0	0	0	0	0	0	0	0	1	0	0	0	0	0	0	0	0	0	0	0
334393	k__Bacteria	p__Bacteroidetes	c__Bacteroidia	o__Bacteroidales	f__Bacteroidaceae	g__Bacteroides	s__unclassified	number.1 gg_id:00000 some annotation	0	0	0	0	0	0	0	0	13	0	0	0	0	0	0	0	0	0	0	0	0	1	2	0	0	0	0	0	1	268	0	0	0	0	0	0	0	0	0	0	0
179795	k__Bacteria	p__Firmicutes	c__Clostridia	o__Clostridiales	f__Lachnospiraceae	g__unclassified	s__unclassified	number.1 gg_id:00000 some annotation	0	0	0	0	0	0	0	0	0	0	0	0	0	0	0	0	0	0	0	0	0	0	0	0	0	0	0	0	0	218	0	0	0	0	0	0	0	0	1	0	0
202171	k__Bacteria	p__Planctomycetes	c__Planctomycea	o__Gemmatales	f__Isosphaeraceae	g__unclassified	s__unclassified	number.1 gg_id:00000 some annotation	0	0	0	0	0	0	0	0	5	0	0	0	0	0	0	0	0	0	0	0	0	0	0	0	0	0	0	0	0	0	0	0	0	0	0	0	0	0	0	0	0
103055	k__Bacteria	p__Proteobacteria	c__Gammaproteobacteria	o__Oceanospirillales	f__OM60	g__unclassified	s__unclassified	number.1 gg_id:00000 some annotation	0	0	0	0	0	0	0	0	0	0	1	0	0	0	0	0	0	0	0	0	0	0	0	0	0	0	0	0	0	0	0	0	0	0	0	0	0	0	0	0	0
206324	k__Bacteria	p__Bacteroidetes	c__Bacteroidia	o__Bacteroidales	f__RikenellaceaeII	g__unclassified	s__unclassified	number.1 gg_id:00000 some annotation	0	0	0	0	0	0	0	0	0	0	0	0	0	0	0	0	0	0	0	0	0	0	0	0	0	0	0	0	0	0	0	0	0	0	0	0	0	0	0	0	0
303304	k__Bacteria	p__Bacteroidetes	c__Bacteroidia	o__Bacteroidales	f__Prevotellaceae	g__Prevotella	s__Prevotella_copri	number.1 gg_id:00000 some annotation	0	0	0	0	0	0	0	1	5	0	0	0	0	0	0	3	0	0	0	0	0	0	3	0	0	0	0	0	0	279	0	0	0	1	0	0	0	0	0	0	0
517495	k__Bacteria	p__Firmicutes	c__Clostridia	o__Clostridiales	f__Ruminococcaceae	g__Ruminococcus	s__unclassified	number.1 gg_id:00000 some annotation	0	0	0	0	0	0	0	0	0	0	0	0	0	0	0	0	0	0	0	0	0	0	0	0	0	0	0	0	0	0	0	0	0	0	0	0	0	0	0	0	0
138766	k__Bacteria	p__Nitrospirae	c__Nitrospira	o__Nitrospirales	f__Nitrospiraceae	g__Nitrospira	s__unclassified	number.1 gg_id:00000 some annotation	0	0	0	0	0	0	0	0	0	0	0	0	0	0	1	0	0	0	0	0	0	0	0	0	0	0	0	0	0	0	0	0	0	0	0	0	0	0	0	0	0
178558	k__Bacteria	p__Bacteroidetes	c__Bacteroidia	o__Bacteroidales	f__Prevotellaceae	g__Prevotella	s__unclassified	number.1 gg_id:00000 some annotation	0	0	0	0	0	0	0	0	0	0	0	0	0	0	0	0	0	0	0	0	0	0	0	0	0	0	0	0	0	0	0	0	0	1	0	0	0	0	0	0	0
72003	k__Bacteria	p__Firmicutes	c__Bacilli	o__Lactobacillales	f__Streptococcaceae	g__Streptococcus	s__Streptococcus_thermophilus	number.1 gg_id:00000 some annotation	1	0	1	4	1	1	0	1	0	0	0	7	0	9	12	2	2	0	0	0	0	0	0	0	2	11	0	0	0	0	0	0	0	0	0	0	0	0	0	0	0
212062	k__Bacteria	p__Proteobacteria	c__Betaproteobacteria	o__Burkholderiales	f__Comamonadaceae	g__unclassified	s__unclassified	number.1 gg_id:00000 some annotation	0	0	1	0	1	0	0	0	0	0	0	0	0	0	0	0	0	0	0	0	0	4	0	0	0	1	0	0	2	0	0	0	0	0	0	0	0	0	0	0	0
385545	k__Bacteria	p__Firmicutes	c__Clostridia	o__Clostridiales	f__Lachnospiraceae	g__unclassified	s__unclassified	number.1 gg_id:00000 some annotation	0	0	0	0	0	0	0	0	1	0	0	0	0	0	0	0	0	0	0	0	0	0	0	0	0	0	0	0	0	0	0	0	0	0	0	0	0	0	0	0	0
361809	k__Bacteria	p__Firmicutes	c__Clostridia	o__Clostridiales	f__Lachnospiraceae	g__Ruminococcus	s__unclassified	number.1 gg_id:00000 some annotation	0	0	0	0	0	0	0	0	0	0	0	0	0	0	0	0	0	0	0	0	0	0	0	0	0	0	0	0	0	0	0	0	0	0	0	0	0	0	0	0	0
252119	k__Bacteria	p__Actinobacteria	c__Actinobacteria	o__Actinomycetales	f__Micrococcaceae	g__Micrococcus	s__unclassified	number.1 gg_id:00000 some annotation	0	0	0	0	0	0	3	0	2	0	0	0	0	0	0	0	0	0	0	0	0	17	0	0	0	0	0	0	0	0	0	0	0	3	0	0	0	0	0	0	0
361804	k__Bacteria	p__Bacteroidetes	c__Flavobacteria	o__Flavobacteriales	f__Flavobacteriaceae	g__Capnocytophaga	s__Capnocytophaga_sputigena	number.1 gg_id:00000 some annotation	2	5	0	1	0	0	8	0	1	3	11	0	5	0	1	5	0	4	0	1	11	12	6	0	0	0	2636	0	0	0	0	0	2	0	5	2	0	0	0	0	636
137411	k__Bacteria	p__Proteobacteria	c__Betaproteobacteria	o__Burkholderiales	f__unclassified	g__unclassified	s__unclassified	number.1 gg_id:00000 some annotation	0	0	0	0	0	0	0	0	0	0	0	0	0	0	0	1	0	0	0	0	0	0	0	0	0	0	0	0	1	0	0	0	0	0	0	0	0	0	0	0	0
169076	k__Bacteria	p__Firmicutes	c__Clostridia	o__Clostridiales	f__Lachnospiraceae	g__unclassified	s__unclassified	number.1 gg_id:00000 some annotation	0	0	0	0	0	0	0	0	0	0	0	0	0	0	0	0	0	0	0	0	0	0	0	0	0	0	0	0	0	72	0	0	0	0	0	0	0	0	0	0	0
51535	k__Bacteria	p__Proteobacteria	c__Deltaproteobacteria	o__Desulfovibrionales	f__Desulfovibrionaceae	g__Desulfovibrio	s__unclassified	number.1 gg_id:00000 some annotation	0	0	0	0	0	0	0	0	0	0	0	0	0	0	0	0	2	0	0	0	0	0	0	0	0	0	0	0	0	0	0	0	0	0	0	0	0	0	0	0	0
315994	k__Bacteria	p__Proteobacteria	c__Gammaproteobacteria	o__Legionellales	f__Legionellaceae	g__Legionella	s__unclassified	number.1 gg_id:00000 some annotation	0	0	0	0	0	0	0	0	0	0	0	0	0	0	0	0	0	0	0	0	0	0	0	0	0	0	0	0	0	0	0	0	0	0	0	0	0	0	0	0	0
234635	k__Bacteria	p__Firmicutes	c__Clostridia	o__Clostridiales	f__Lachnospiraceae	g__unclassified	s__unclassified	number.1 gg_id:00000 some annotation	0	0	0	0	0	0	0	1	17	0	0	0	0	0	0	0	0	0	0	0	0	0	0	0	0	0	0	0	0	0	0	0	0	0	0	0	0	0	0	0	0
544356	k__Bacteria	p__Proteobacteria	c__Betaproteobacteria	o__Burkholderiales	f__Comamonadaceae	g__unclassified	s__unclassified	number.1 gg_id:00000 some annotation	0	0	0	0	0	0	0	0	1	0	0	0	0	0	0	0	0	0	0	0	0	0	0	0	0	0	0	0	0	0	0	0	0	0	0	0	0	0	0	0	0
170509	k__Bacteria	p__Proteobacteria	c__Betaproteobacteria	o__Burkholderiales	f__Oxalobacteraceae	g__unclassified	s__unclassified	number.1 gg_id:00000 some annotation	0	0	0	0	0	0	0	0	0	0	0	0	0	0	0	0	0	0	0	0	0	0	0	0	0	0	0	0	0	0	0	0	0	0	0	0	0	0	0	0	0
179555	k__Bacteria	p__Proteobacteria	c__Alphaproteobacteria	o__Rhodobacterales	f__Rhodobacteraceae	g__Paracoccus	s__unclassified	number.1 gg_id:00000 some annotation	0	1	0	0	0	0	0	0	0	0	0	0	0	0	0	0	0	0	0	0	0	0	0	0	0	0	0	0	0	0	0	0	0	0	0	0	0	0	0	0	0
453405	k__Bacteria	p__Firmicutes	c__Clostridia	o__Clostridiales	f__Lachnospiraceae	g__unclassified	s__unclassified	number.1 gg_id:00000 some annotation	0	0	0	0	0	0	0	0	0	0	0	0	0	0	0	0	0	0	0	0	0	0	0	0	0	0	0	0	0	0	0	0	0	80	0	0	0	0	0	0	0
325969	k__Bacteria	p__Firmicutes	c__Clostridia	o__Clostridiales	f__Lachnospiraceae	g__Coprococcus	s__Clostridium_sp._SS2/1	number.1 gg_id:00000 some annotation	0	0	0	0	0	0	0	0	0	0	0	0	0	0	0	0	0	0	0	0	0	0	0	0	0	0	0	0	0	0	0	0	0	0	0	0	0	0	0	0	1
91326	k__Bacteria	p__Proteobacteria	c__Alphaproteobacteria	o__Sphingomonadales	f__Sphingomonadaceae	g__Novosphingobium	s__unclassified	number.1 gg_id:00000 some annotation	0	0	0	0	2	0	0	0	0	0	1	0	2	1	0	1	1	0	0	0	0	46	4	0	0	0	0	0	15	143	0	0	0	0	0	0	0	1	0	0	0
593672	k__Bacteria	p__Firmicutes	c__Bacilli	o__Lactobacillales	f__unclassified	g__unclassified	s__unclassified	number.1 gg_id:00000 some annotation	0	0	0	0	0	0	0	0	0	0	0	1	0	0	1	0	0	0	0	0	0	0	0	0	0	0	0	0	0	0	0	0	0	0	0	0	0	0	0	0	0
109633	k__Bacteria	p__Firmicutes	c__Clostridia	o__Clostridiales	f__Eubacteriaceae	g__unclassified	s__unclassified	number.1 gg_id:00000 some annotation	0	0	0	0	0	0	0	0	0	0	0	0	0	0	0	2	0	0	0	0	0	0	0	0	0	0	0	0	0	0	0	0	0	0	0	0	0	0	0	0	0
244917	k__Bacteria	p__Proteobacteria	c__Alphaproteobacteria	o__Rhizobiales	f__unclassified	g__unclassified	s__unclassified	number.1 gg_id:00000 some annotation	0	0	0	0	0	0	0	0	0	0	0	0	0	0	0	0	0	0	0	0	0	0	0	0	0	0	0	0	0	0	0	0	0	0	0	0	0	0	0	0	0
12570	k__Bacteria	p__Actinobacteria	c__Actinobacteria	o__Actinomycetales	f__Actinomycetaceae	g__Actinomyces	s__unclassified	number.1 gg_id:00000 some annotation	0	2	1	0	1	0	0	0	0	5	7	0	0	7	1	1	0	0	0	0	0	0	29	0	0	1	0	0	0	0	0	0	0	0	2	0	35	1	0	1	2
256813	k__Bacteria	p__Bacteroidetes	c__Sphingobacteria	o__Sphingobacteriales	f__Chitinophagaceae	g__unclassified	s__unclassified	number.1 gg_id:00000 some annotation	0	0	0	0	0	0	0	0	0	0	0	0	0	0	0	0	0	1	0	0	0	0	0	0	0	0	0	0	0	0	0	0	0	0	0	0	0	0	0	0	0
28952	k__Bacteria	p__Bacteroidetes	c__Bacteroidia	o__Bacteroidales	f__unclassified	g__unclassified	s__unclassified	number.1 gg_id:00000 some annotation	8	39	4	4	1	8	12	93	49	52	92	3	43	3	2	231	282	593	40	261	26	0	0	238	3	82	11	3	8	0	239	220	321	0	923	149	1	68	752	2	934
568548	k__Bacteria	p__Proteobacteria	c__Epsilonproteobacteria	o__Campylobacterales	f__Helicobacteraceae	g__Sulfuricurvum	s__Sulfuricurvum_kujiense	number.1 gg_id:00000 some annotation	0	0	0	0	0	0	0	0	0	0	0	0	0	0	0	0	0	0	0	0	0	0	0	0	0	0	0	0	0	0	0	0	0	0	0	0	0	0	0	0	0
207983	k__Bacteria	p__Firmicutes	c__Clostridia	o__Clostridiales	f__Ruminococcaceae	g__Oscillospira	s__unclassified	number.1 gg_id:00000 some annotation	0	0	0	0	0	0	0	0	0	0	0	0	0	0	0	0	0	0	0	0	0	0	0	0	0	0	0	0	0	0	0	0	0	0	0	0	0	0	1	0	0
298862	k__Bacteria	p__Firmicutes	c__Bacilli	o__Lactobacillales	f__Streptococcaceae	g__Streptococcus	s__unclassified	number.1 gg_id:00000 some annotation	0	0	0	0	0	0	0	2	0	1	0	1	0	0	2	1	0	0	0	0	0	0	0	0	0	0	0	0	1	0	0	0	0	0	0	1	0	0	2	1	0
16054	k__Bacteria	p__Firmicutes	c__Clostridia	o__Clostridiales	f__Ruminococcaceae	g__Ruminococcus	s__Ruminococcus_callidus	number.1 gg_id:00000 some annotation	0	0	0	0	0	0	0	0	0	0	0	0	0	0	0	0	0	0	0	0	0	0	0	0	0	0	0	0	1	0	0	0	0	0	0	0	0	0	0	0	0
16057	k__Bacteria	p__Firmicutes	c__Clostridia	o__Clostridiales	f__Ruminococcaceae	g__unclassified	s__unclassified	number.1 gg_id:00000 some annotation	0	1	0	0	0	0	0	0	0	0	0	0	0	0	0	0	0	0	0	0	0	0	0	0	0	0	0	0	0	0	0	0	0	0	0	0	0	0	0	0	0
463843	k__Bacteria	p__Firmicutes	c__Clostridia	o__Clostridiales	f__Lachnospiraceae	g__Moryella	s__unclassified	number.1 gg_id:00000 some annotation	0	0	0	0	0	0	0	0	0	0	0	0	0	0	0	0	0	0	0	3	0	0	0	0	0	0	0	0	0	0	0	0	0	0	0	0	0	0	0	0	0
239066	k__Bacteria	p__Proteobacteria	c__Deltaproteobacteria	o__Bdellovibrionales	f__Bacteriovoracaceae	g__unclassified	s__unclassified	number.1 gg_id:00000 some annotation	0	0	0	0	0	0	0	0	0	0	0	0	0	0	0	0	0	0	0	0	0	0	0	0	0	0	0	0	0	0	0	0	0	0	0	0	0	0	0	0	0
239064	k__Bacteria	p__Proteobacteria	c__Betaproteobacteria	o__Burkholderiales	f__Comamonadaceae	g__Brachymonas	s__unclassified	number.1 gg_id:00000 some annotation	0	0	0	0	14	0	0	0	0	0	0	0	0	0	0	0	0	0	0	0	0	0	0	0	0	0	46	0	0	0	0	0	0	0	1	0	1	0	0	0	123
141815	k__Bacteria	p__Armatimonadetes	c__Armatimonadia	o__Armatimonadales	f__Armatimonadaceae	g__Armatimonas	s__unclassified	number.1 gg_id:00000 some annotation	0	0	0	0	0	0	0	0	1	0	0	0	0	0	0	0	0	0	0	0	0	0	0	0	0	0	0	0	0	0	0	0	0	0	0	0	0	0	0	0	0
577170	k__Bacteria	p__Bacteroidetes	c__Bacteroidia	o__Bacteroidales	f__Bacteroidaceae	g__Bacteroides	s__unclassified	number.1 gg_id:00000 some annotation	0	0	0	0	0	0	0	0	2	0	2	0	0	0	0	0	1	0	0	0	0	0	0	0	0	0	0	0	0	733	0	0	0	116	0	1	0	0	1	0	0
51718	k__Bacteria	p__Proteobacteria	c__Betaproteobacteria	o__Burkholderiales	f__unclassified	g__unclassified	s__unclassified	number.1 gg_id:00000 some annotation	0	0	0	0	0	0	0	0	0	0	1	0	0	0	0	0	0	0	0	0	0	0	0	0	0	0	0	0	0	0	0	0	0	0	0	0	0	0	0	0	0
580716	k__Bacteria	p__Proteobacteria	c__Betaproteobacteria	o__Burkholderiales	f__Aquabacteriaceae	g__Aquabacterium	s__unclassified	number.1 gg_id:00000 some annotation	0	0	2	0	0	1	0	0	1	0	0	1	1	0	0	0	0	0	0	0	0	2	0	0	0	2	0	0	3	0	0	0	0	0	0	0	0	0	0	0	0
469709	k__Bacteria	p__Bacteroidetes	c__Bacteroidia	o__Bacteroidales	f__Bacteroidaceae	g__Bacteroides	s__Bacteroides_uniformis	number.1 gg_id:00000 some annotation	0	0	0	0	0	0	0	0	32	1	0	0	0	0	0	0	0	0	0	0	0	0	4	0	1	0	0	0	0	170	0	0	0	83	0	0	0	0	0	0	1
82683	k__Bacteria	p__Actinobacteria	c__Actinobacteria	o__Actinomycetales	f__Microbacteriaceae	g__unclassified	s__unclassified	number.1 gg_id:00000 some annotation	0	0	0	0	1	0	0	0	0	0	0	0	0	0	0	0	0	0	0	0	0	0	0	0	0	0	0	0	0	0	0	0	0	0	0	0	0	0	0	0	0
183879	k__Bacteria	p__Firmicutes	c__Clostridia	o__Clostridiales	f__Lachnospiraceae	g__Blautia	s__unclassified	number.1 gg_id:00000 some annotation	0	0	0	0	0	1	0	0	0	0	0	0	0	0	0	0	0	0	0	0	0	0	2	0	0	2	0	0	0	93	0	0	0	0	0	0	0	0	0	0	0
158234	k__Bacteria	p__Actinobacteria	c__Actinobacteria	o__Actinomycetales	f__Micrococcaceae	g__Kocuria	s__unclassified	number.1 gg_id:00000 some annotation	0	0	0	0	0	0	0	0	0	0	0	0	0	0	0	0	0	0	0	0	0	0	0	0	0	0	0	0	0	0	0	0	0	0	0	0	0	0	0	0	0
130663	k__Bacteria	p__Bacteroidetes	c__Bacteroidia	o__Bacteroidales	f__Bacteroidaceae	g__Bacteroides	s__Bacteroides_fragilis	number.1 gg_id:00000 some annotation	0	3	1	0	0	1	0	0	33	0	0	0	0	0	0	0	0	0	0	0	0	171	0	0	0	0	0	1	0	2623	0	0	0	157	1	0	0	6	1	0	2
304523	k__Bacteria	p__Proteobacteria	c__Alphaproteobacteria	o__Rhizobiales	f__Methylobacteriaceae	g__Methylobacterium	s__Methylobacterium_radiotolerans	number.1 gg_id:00000 some annotation	0	0	1	0	0	0	0	0	41	3	2	3	5	0	0	0	0	0	0	1	0	223	0	0	0	2	0	0	1	0	0	0	0	334	0	0	0	0	0	0	0
571521	k__Bacteria	p__Proteobacteria	c__Betaproteobacteria	o__Burkholderiales	f__Oxalobacteraceae	g__Massilia	s__Massilia_timonae	number.1 gg_id:00000 some annotation	0	0	0	0	0	0	0	0	0	0	0	0	0	0	0	0	0	0	0	0	0	0	0	0	0	0	0	0	0	0	0	0	0	1	0	0	0	0	0	0	0
323257	k__Bacteria	p__Firmicutes	c__Bacilli	o__Lactobacillales	f__Lactobacillaceae	g__Lactobacillus	s__unclassified	number.1 gg_id:00000 some annotation	0	0	0	0	0	0	0	0	0	0	0	10	0	1	0	0	7	0	0	0	0	0	0	0	0	0	0	0	0	0	0	0	0	0	0	0	0	0	0	0	0
9477	k__Bacteria	p__Proteobacteria	c__Gammaproteobacteria	o__Pasteurellales	f__Pasteurellaceae	g__unclassified	s__unclassified	number.1 gg_id:00000 some annotation	0	0	1	0	0	0	0	0	0	1	0	0	0	51	5	0	0	0	0	0	0	0	59	0	0	0	0	0	46	0	0	0	9	0	0	2	379	0	0	0	0
43142	k__Bacteria	p__Firmicutes	c__Bacilli	o__Lactobacillales	f__Lactobacillaceae	g__Lactobacillus	s__unclassified	number.1 gg_id:00000 some annotation	0	0	0	0	0	0	0	0	0	0	0	0	0	0	0	0	0	0	0	0	0	0	0	0	0	0	0	0	0	0	0	0	0	0	0	0	0	0	0	0	0
142943	k__Bacteria	p__Bacteroidetes	c__unclassified	o__unclassified	f__unclassified	g__unclassified	s__unclassified	number.1 gg_id:00000 some annotation	0	0	0	0	0	0	0	0	0	0	0	0	0	0	0	0	0	0	0	0	0	0	0	0	0	0	0	0	0	0	0	0	0	0	0	0	0	0	0	0	0
223059	k__Bacteria	p__Firmicutes	c__Clostridia	o__Clostridiales	f__Ruminococcaceae	g__Ruminococcus	s__Ruminococcus_bromii	number.1 gg_id:00000 some annotation	0	0	0	0	0	0	0	0	0	0	0	0	0	0	0	0	0	0	0	0	0	0	0	0	0	0	0	0	0	3	0	0	0	0	0	0	0	0	0	0	0
348002	k__Bacteria	p__Actinobacteria	c__Actinobacteria	o__Actinomycetales	f__Microbacteriaceae	g__unclassified	s__unclassified	number.1 gg_id:00000 some annotation	0	0	0	0	0	0	0	0	1	0	0	0	0	0	0	0	0	0	0	0	0	0	0	0	0	0	0	0	0	0	0	0	0	0	0	0	0	0	0	0	0
104043	k__Bacteria	p__Bacteroidetes	c__Bacteroidia	o__Bacteroidales	f__Prevotellaceae	g__Prevotella	s__unclassified	number.1 gg_id:00000 some annotation	11	0	1	1	0	2	5	0	15	20	30	25	17	361	64	232	274	8	0	87	8	103	14	469	401	547	10	3	14	0	0	14	432	0	485	862	1	1566	67	144	984
578911	k__Bacteria	p__Firmicutes	c__Bacilli	o__Exiguobacterales	f__Exiguobacteraceae	g__Exiguobacterium	s__unclassified	number.1 gg_id:00000 some annotation	0	0	0	0	0	0	0	0	0	0	0	0	0	0	0	0	0	0	0	0	0	0	0	0	0	0	0	0	0	0	0	0	0	0	0	0	0	0	0	0	0
105640	k__Bacteria	p__Proteobacteria	c__Betaproteobacteria	o__Burkholderiales	f__Comamonadaceae	g__Malikia	s__unclassified	number.1 gg_id:00000 some annotation	0	0	0	0	1	0	0	0	8	0	0	0	0	0	0	0	0	0	0	0	0	0	0	0	0	0	0	0	0	0	0	0	0	0	0	0	0	0	0	0	0
3403	k__Bacteria	p__Cyanobacteria	c__Chloroplast	o__Stramenopiles	f__unclassified	g__unclassified	s__unclassified	number.1 gg_id:00000 some annotation	0	0	0	0	0	0	0	0	0	0	0	0	0	0	0	0	0	0	0	0	0	0	0	0	0	0	0	0	0	0	0	0	0	0	0	0	0	0	0	0	0
436723	k__Bacteria	p__Proteobacteria	c__Gammaproteobacteria	o__Enterobacteriales	f__Enterobacteriaceae	g__unclassified	s__unclassified	number.1 gg_id:00000 some annotation	0	0	0	0	0	0	0	0	4	0	0	0	0	0	0	0	0	0	0	0	0	4	0	0	0	0	0	0	0	8	0	0	0	5	0	0	0	0	0	0	0
423025	k__Bacteria	p__Proteobacteria	c__Gammaproteobacteria	o__Aeromonadales	f__Aeromonadaceae	g__Aeromonas	s__unclassified	number.1 gg_id:00000 some annotation	0	0	0	0	0	0	0	0	0	0	0	0	0	0	0	0	0	0	0	0	0	0	0	0	0	0	0	0	1	0	0	0	0	0	0	0	0	0	0	0	0
162320	k__Bacteria	p__Bacteroidetes	c__Flavobacteria	o__Flavobacteriales	f__Flavobacteriaceae	g__Capnocytophaga	s__Capnocytophaga_ochracea	number.1 gg_id:00000 some annotation	0	0	0	0	0	0	0	0	0	0	0	0	0	0	0	0	0	0	0	0	104	0	1	0	0	0	0	2	0	0	0	0	0	0	0	0	1	0	0	0	0
163014	k__Bacteria	p__Firmicutes	c__Clostridia	o__Clostridiales	f__Lachnospiraceae	g__unclassified	s__unclassified	number.1 gg_id:00000 some annotation	0	0	0	0	0	0	0	0	8	0	0	0	0	0	0	0	0	0	0	0	0	0	0	0	0	0	0	0	0	0	0	0	0	0	0	0	0	0	0	0	0
140940	k__Bacteria	p__Firmicutes	c__Bacilli	o__Lactobacillales	f__unclassified	g__unclassified	s__unclassified	number.1 gg_id:00000 some annotation	0	0	0	0	0	0	0	1	0	0	0	0	0	0	0	0	0	0	0	0	0	0	0	0	0	0	0	0	0	0	0	0	0	0	0	0	0	1	0	0	0
70512	k__Bacteria	p__Proteobacteria	c__Gammaproteobacteria	o__Pasteurellales	f__Pasteurellaceae	g__Actinobacillus	s__unclassified	number.1 gg_id:00000 some annotation	18	15	9	16	3	0	5	3	12	3	4	1	6860	2	5	7575	0	8	1	2	1	1	3	2	5259	1	0	1706	2627	2	3860	17	2	2	7	4	1	5	10	1516	2
368299	k__Bacteria	p__Fusobacteria	c__Fusobacteria	o__Fusobacteriales	f__Fusobacteriaceae	g__Fusobacterium	s__unclassified	number.1 gg_id:00000 some annotation	0	0	0	0	0	0	0	0	0	0	0	0	0	0	0	0	0	0	0	0	0	0	0	0	0	0	0	0	0	0	0	0	0	0	0	0	0	0	0	0	0
298460	k__Bacteria	p__Firmicutes	c__Clostridia	o__Clostridiales	f__Lachnospiraceae	g__unclassified	s__unclassified	number.1 gg_id:00000 some annotation	0	0	0	0	0	0	0	0	0	0	0	0	0	0	0	0	0	0	0	0	0	0	0	0	0	0	0	0	0	24	0	0	0	0	0	0	0	0	0	0	0
175682	k__Bacteria	p__Firmicutes	c__Clostridia	o__Clostridiales	f__Lachnospiraceae	g__Roseburia	s__Eubacterium_rectale	number.1 gg_id:00000 some annotation	0	0	0	0	0	0	0	0	0	0	0	0	0	0	0	0	0	0	0	0	0	3	1	0	0	0	0	0	0	0	0	0	0	0	0	0	0	0	0	0	0
299390	k__Bacteria	p__Firmicutes	c__Clostridia	o__Clostridiales	f__Lachnospiraceae	g__Blautia	s__Blautia_producta	number.1 gg_id:00000 some annotation	0	0	0	0	0	0	0	0	0	0	0	0	0	0	0	0	0	0	0	0	0	0	0	0	0	0	0	0	0	0	0	0	0	0	0	0	0	0	0	0	0
157055	k__Bacteria	p__Proteobacteria	c__Gammaproteobacteria	o__Enterobacteriales	f__Enterobacteriaceae	g__Escherichia	s__unclassified	number.1 gg_id:00000 some annotation	0	0	0	0	0	0	0	0	0	0	0	0	0	0	0	0	0	0	0	0	0	0	0	0	0	0	0	0	0	1	0	0	0	0	0	0	0	0	0	0	0
199455	k__Bacteria	p__Firmicutes	c__Clostridia	o__Clostridiales	f__Lachnospiraceae	g__Blautia	s__unclassified	number.1 gg_id:00000 some annotation	0	0	0	0	1	0	0	0	0	0	0	0	0	0	0	0	0	0	0	0	0	0	0	0	0	0	0	0	0	0	0	0	0	0	0	0	0	0	0	0	0
484462	k__Bacteria	p__Fusobacteria	c__Fusobacteria	o__Fusobacteriales	f__Fusobacteriaceae	g__Leptotrichia	s__unclassified	number.1 gg_id:00000 some annotation	0	0	0	2	5	0	78	0	0	3	0	0	9	15	8	34	0	15	0	0	3	0	78	0	0	0	0	0	0	0	2	6	2	0	2	2	841	0	0	0	0
265669	k__Bacteria	p__Firmicutes	c__Clostridia	o__Clostridiales	f__Ruminococcaceae	g__Oscillospira	s__unclassified	number.1 gg_id:00000 some annotation	0	0	0	0	0	0	0	0	179	0	0	0	0	0	0	0	0	0	0	0	0	0	0	0	0	0	0	0	0	0	0	0	0	0	0	0	0	0	0	0	0
419544	k__Bacteria	p__Proteobacteria	c__Gammaproteobacteria	o__Xanthomonadales	f__Xanthomonadaceae	g__Stenotrophomonas	s__unclassified	number.1 gg_id:00000 some annotation	0	0	0	0	0	0	0	0	0	0	0	0	0	0	0	0	0	0	0	0	0	0	0	0	0	0	0	0	0	0	0	0	0	0	0	0	0	0	0	0	0
470688	k__Bacteria	p__Firmicutes	c__Bacilli	o__unclassified	f__unclassified	g__unclassified	s__unclassified	number.1 gg_id:00000 some annotation	0	0	0	0	0	0	1	0	0	0	0	0	0	0	0	0	0	0	0	0	0	0	0	0	1	0	0	0	0	0	0	0	0	0	0	0	0	0	0	0	0
471308	k__Bacteria	p__Firmicutes	c__Bacilli	o__Lactobacillales	f__Lactobacillaceae	g__Lactobacillus	s__Lactobacillus_salivarius	number.1 gg_id:00000 some annotation	0	0	0	0	0	0	0	0	0	0	0	0	0	3	0	0	0	0	0	0	0	0	0	0	0	0	0	0	0	0	0	0	0	0	0	0	0	0	0	0	0
108777	k__Bacteria	p__Proteobacteria	c__Betaproteobacteria	o__Burkholderiales	f__Comamonadaceae	g__Hylemonella	s__unclassified	number.1 gg_id:00000 some annotation	0	0	0	0	1	0	0	0	0	0	0	0	0	0	0	2	0	0	0	0	0	0	0	0	0	0	0	0	3	0	0	0	0	0	0	0	0	0	0	0	0
445733	k__Bacteria	p__Proteobacteria	c__Alphaproteobacteria	o__Sphingomonadales	f__Erythrobacteraceae	g__unclassified	s__unclassified	number.1 gg_id:00000 some annotation	0	0	0	0	0	0	0	0	0	0	0	0	0	0	0	0	0	0	0	0	0	39	0	0	0	0	0	0	0	0	0	0	0	0	0	0	0	0	0	0	0
533937	k__Bacteria	p__Proteobacteria	c__Gammaproteobacteria	o__Pasteurellales	f__Pasteurellaceae	g__unclassified	s__unclassified	number.1 gg_id:00000 some annotation	320	5	295	1	5	1	2	1	3	0	2	0	221	0	1	51	0	1422	1	2	0	0	0	16	0	1	0	1	2	0	2340	25	2198	0	1	0	18	97	1	1	5
528842	k__Bacteria	p__Firmicutes	c__Bacilli	o__Lactobacillales	f__Streptococcaceae	g__Streptococcus	s__unclassified	number.1 gg_id:00000 some annotation	1229	30	22	1586	48	47	134	665	303	46	40	1159	70	1871	2970	586	526	45	2	1	11	363	9	22	782	967	2	113	143	0	679	2	140	2	14	212	11	247	352	2995	149
108771	k__Bacteria	p__Proteobacteria	c__Betaproteobacteria	o__Burkholderiales	f__Alcaligenaceae	g__unclassified	s__unclassified	number.1 gg_id:00000 some annotation	0	0	0	0	0	0	0	0	0	0	0	0	0	0	0	0	0	0	0	0	0	0	0	0	0	0	0	0	0	0	0	0	0	0	0	0	0	0	0	0	2
264539	k__Bacteria	p__Firmicutes	c__Clostridia	o__Clostridiales	f__Ruminococcaceae	g__Clostridium	s__Flavonifractor_plautii	number.1 gg_id:00000 some annotation	0	0	0	0	0	0	0	0	0	0	0	0	0	0	0	0	0	0	0	0	0	0	0	0	0	0	0	0	0	0	0	0	0	73	0	0	0	0	0	0	0
264534	k__Bacteria	p__Bacteroidetes	c__Bacteroidia	o__Bacteroidales	f__RikenellaceaeII	g__unclassified	s__unclassified	number.1 gg_id:00000 some annotation	0	0	0	0	0	0	0	0	43	0	0	0	0	0	1	0	0	0	0	0	0	0	0	0	0	0	0	0	0	0	0	0	0	0	0	0	0	0	0	0	0
86784	k__Bacteria	p__Actinobacteria	c__Actinobacteria	o__Bifidobacteriales	f__Bifidobacteriaceae	g__Scardovia	s__Scardovia_inopinata	number.1 gg_id:00000 some annotation	0	0	0	0	0	0	0	0	0	0	0	9	0	259	4	0	0	0	0	0	0	0	0	0	0	0	0	1	0	0	0	0	0	0	0	0	0	0	0	0	0
516022	k__Bacteria	p__Tenericutes	c__Erysipelotrichi	o__Erysipelotrichales	f__Erysipelotrichaceae	g__Clostridium	s__unclassified	number.1 gg_id:00000 some annotation	0	0	0	0	0	0	0	0	58	0	0	0	0	0	0	0	0	0	0	0	0	0	0	0	0	0	0	0	0	477	0	0	0	0	0	0	0	0	0	0	2
38061	k__Bacteria	p__Fusobacteria	c__Fusobacteria	o__Fusobacteriales	f__Fusobacteriaceae	g__Leptotrichia	s__unclassified	number.1 gg_id:00000 some annotation	0	0	0	0	0	0	0	0	0	0	0	0	0	6	0	4	0	0	0	1	0	0	0	0	0	0	0	0	0	0	0	0	1	0	3	1	0	0	0	0	0
246243	k__Bacteria	p__Bacteroidetes	c__Sphingobacteria	o__Sphingobacteriales	f__Chitinophagaceae	g__unclassified	s__unclassified	number.1 gg_id:00000 some annotation	0	0	0	0	0	0	0	0	0	0	0	0	0	0	0	0	0	0	0	0	0	0	0	0	0	1	0	0	0	0	0	0	0	0	0	0	0	0	0	0	0
314184	k__Bacteria	p__Planctomycetes	c__Planctomycea	o__Planctomycetales	f__Planctomycetaceae	g__Planctomyces	s__unclassified	number.1 gg_id:00000 some annotation	0	0	0	0	0	0	1	0	0	0	0	0	0	0	0	0	0	0	0	0	0	0	0	0	0	0	0	0	0	0	0	0	0	0	0	0	0	0	0	0	0
567336	k__Bacteria	p__Proteobacteria	c__Alphaproteobacteria	o__Rhizobiales	f__Bradyrhizobiaceae	g__Bosea	s__unclassified	number.1 gg_id:00000 some annotation	0	0	0	0	0	0	0	0	0	0	0	0	0	0	0	0	0	0	0	0	0	0	0	0	0	0	0	0	0	0	0	0	0	0	0	0	0	0	0	0	0
211156	k__Bacteria	p__Actinobacteria	c__Actinobacteria	o__Actinomycetales	f__Corynebacteriaceae	g__Corynebacterium	s__unclassified	number.1 gg_id:00000 some annotation	0	0	0	0	0	0	0	0	0	0	0	0	0	0	0	0	0	0	0	1	0	0	1	0	0	0	0	0	0	0	0	0	0	0	0	0	1	0	0	0	0
84214	k__Bacteria	p__Proteobacteria	c__Betaproteobacteria	o__Hydrogenophilales	f__Hydrogenophilaceae	g__unclassified	s__unclassified	number.1 gg_id:00000 some annotation	0	0	0	0	0	0	0	0	0	0	0	2	0	0	0	0	0	0	0	0	0	0	0	0	0	0	0	0	0	0	0	0	0	0	0	0	0	0	0	0	0
357085	k__Bacteria	p__Acidobacteria	c__Chloracidobacteria	o__unclassified	f__unclassified	g__unclassified	s__unclassified	number.1 gg_id:00000 some annotation	0	0	0	0	0	0	0	0	4	0	0	0	0	0	0	0	0	0	0	0	0	0	0	0	0	0	0	0	0	0	0	0	0	0	0	0	0	0	0	0	0
470462	k__Bacteria	p__Firmicutes	c__Bacilli	o__Gemellales	f__Gemellaceae	g__Gemella	s__unclassified	number.1 gg_id:00000 some annotation	45	18	2761	137	1969	11155	11477	487	202	495	339	16969	79	206	425	1779	1106	33	23	9	23	358	250	71	2433	433	923	221	326	84	1347	157	87	4	163	843	258	225	34	358	767
470460	k__Bacteria	p__Actinobacteria	c__Actinobacteria	o__Bifidobacteriales	f__Bifidobacteriaceae	g__Gardnerella	s__Gardnerella_vaginalis	number.1 gg_id:00000 some annotation	0	0	0	0	0	0	0	0	0	0	0	0	0	0	0	0	0	0	0	0	0	0	0	0	0	0	0	0	0	0	0	0	0	0	76	0	0	0	0	0	0
59902	k__Bacteria	p__Proteobacteria	c__Betaproteobacteria	o__Burkholderiales	f__unclassified	g__unclassified	s__unclassified	number.1 gg_id:00000 some annotation	0	0	0	0	0	0	0	0	0	0	0	0	0	0	0	0	0	0	0	0	0	2	0	0	0	0	0	0	1	0	0	0	0	0	0	0	0	0	0	0	0
178122	k__Bacteria	p__Firmicutes	c__Clostridia	o__Clostridiales	f__Lachnospiraceae	g__Blautia	s__Ruminococcus_obeum	number.1 gg_id:00000 some annotation	0	0	0	0	0	0	0	0	0	0	0	0	0	0	0	0	0	0	0	0	0	0	0	0	0	0	0	0	0	0	0	0	0	0	0	0	0	0	0	0	0
283100	k__Bacteria	p__Proteobacteria	c__Epsilonproteobacteria	o__Campylobacterales	f__Campylobacteraceae	g__Sulfurospirillum	s__unclassified	number.1 gg_id:00000 some annotation	0	0	1	0	0	0	0	0	0	0	0	0	0	0	0	0	0	0	0	0	0	0	0	0	0	0	0	0	0	0	0	0	0	0	0	0	0	0	0	0	0
471225	k__Bacteria	p__Cyanobacteria	c__Oscillatoriophycideae	o__Chroococcales	f__Microcystaceae	g__Microcystis	s__unclassified	number.1 gg_id:00000 some annotation	0	0	0	0	0	0	0	0	0	0	0	0	0	0	0	0	0	0	0	0	0	0	0	0	0	0	0	0	0	0	0	0	0	0	0	0	0	0	0	0	0
24210	k__Bacteria	p__Spirochaetes	c__Spirochaetes	o__Spirochaetales	f__Spirochaetaceae	g__Treponema	s__Treponema_socranskii	number.1 gg_id:00000 some annotation	0	0	0	0	0	0	0	0	0	0	0	0	3	5	0	1	0	0	0	3	11	0	0	0	0	0	0	0	0	0	0	0	1	0	0	0	0	0	0	0	6
317637	k__Bacteria	p__Firmicutes	c__Clostridia	o__Clostridiales	f__Lachnospiraceae	g__unclassified	s__unclassified	number.1 gg_id:00000 some annotation	0	0	0	0	0	0	0	0	0	0	0	0	0	0	0	0	0	0	0	0	0	0	0	0	0	0	0	0	0	0	0	0	0	0	0	0	0	0	0	0	0
555922	k__Bacteria	p__Proteobacteria	c__Betaproteobacteria	o__Rhodocyclales	f__Rhodocyclaceae	g__unclassified	s__unclassified	number.1 gg_id:00000 some annotation	0	0	0	0	1	0	0	0	0	0	0	0	0	0	0	0	0	0	0	0	0	0	0	0	0	0	0	0	2	0	0	0	0	0	0	0	0	0	0	0	0
18298	k__Bacteria	p__Bacteroidetes	c__Flavobacteria	o__Flavobacteriales	f__Flavobacteriaceae	g__Capnocytophaga	s__unclassified	number.1 gg_id:00000 some annotation	0	0	0	0	0	0	0	0	0	0	0	0	1	0	0	0	0	0	0	0	1	0	1	0	0	0	26	0	0	0	0	0	0	0	0	0	0	0	0	0	6
229171	k__Bacteria	p__Proteobacteria	c__Gammaproteobacteria	o__Pseudomonadales	f__Moraxellaceae	g__Psychrobacter	s__unclassified	number.1 gg_id:00000 some annotation	0	0	0	0	0	0	0	0	0	0	0	0	0	0	0	0	0	0	0	0	0	0	0	0	0	0	0	0	0	0	0	0	0	0	0	0	0	0	0	0	0
570119	k__Bacteria	p__Bacteroidetes	c__Bacteroidia	o__Bacteroidales	f__Prevotellaceae	g__Prevotella	s__unclassified	number.1 gg_id:00000 some annotation	0	1	0	0	0	0	1	0	0	4	7	7	3	68	1	23	3	0	0	6	36	0	26	0	2	31	0	0	0	0	0	0	1	0	193	512	0	144	3	0	7
171559	k__Bacteria	p__Bacteroidetes	c__Bacteroidia	o__Bacteroidales	f__Bacteroidaceae	g__Bacteroides	s__unclassified	number.1 gg_id:00000 some annotation	0	0	0	0	0	0	0	0	0	0	0	0	0	0	0	0	0	0	0	0	0	0	0	0	0	0	0	0	0	0	0	0	0	1	0	0	0	0	0	0	0
570110	k__Bacteria	p__Bacteroidetes	c__Bacteroidia	o__Bacteroidales	f__Bacteroidaceae	g__Bacteroides	s__unclassified	number.1 gg_id:00000 some annotation	0	0	0	0	0	0	0	0	11	0	0	0	0	0	0	0	0	0	0	0	0	0	0	0	0	0	0	0	0	0	0	0	0	5	0	0	0	0	0	0	0
28012	k__Bacteria	p__Firmicutes	c__Bacilli	o__Bacillales	f__Staphylococcaceae	g__Jeotgalicoccus	s__unclassified	number.1 gg_id:00000 some annotation	0	0	0	0	0	0	0	0	0	0	0	0	0	0	0	0	0	0	0	0	0	0	0	0	0	0	0	0	0	0	0	0	0	0	0	0	0	0	0	0	0
471122	k__Bacteria	p__Bacteroidetes	c__Bacteroidia	o__Bacteroidales	f__Prevotellaceae	g__Prevotella	s__Prevotella_melaninogenica	number.1 gg_id:00000 some annotation	380	10	78	137	35	26	196	156	103	1422	1324	807	1069	3870	45	2060	7050	194	10	252	595	564	38	22582	9475	4376	46	31	122	3	268	9	20336	5	8635	2207	6	9431	2249	14395	2052
34222	k__Bacteria	p__Actinobacteria	c__Actinobacteria	o__Actinomycetales	f__Mycobacteriaceae	g__Mycobacterium	s__unclassified	number.1 gg_id:00000 some annotation	0	0	0	0	0	0	0	0	0	0	0	0	0	0	0	0	0	0	0	0	0	0	0	0	0	0	0	0	0	0	0	0	0	0	0	0	0	0	0	0	0
149430	k__Bacteria	p__Proteobacteria	c__Gammaproteobacteria	o__Xanthomonadales	f__Xanthomonadaceae	g__unclassified	s__unclassified	number.1 gg_id:00000 some annotation	0	0	0	0	0	0	0	1	0	0	0	0	0	0	0	0	0	0	0	0	0	0	0	0	0	0	0	0	0	0	0	0	0	0	0	0	0	0	0	0	0
369685	k__Bacteria	p__Firmicutes	c__Clostridia	o__Clostridiales	f__Lachnospiraceae	g__Eubacterium	s__unclassified	number.1 gg_id:00000 some annotation	0	0	0	0	0	0	0	0	0	0	0	0	0	0	0	0	0	0	0	0	0	0	1	0	0	0	0	0	0	2	0	0	0	0	0	0	0	0	0	0	0
27633	k__Bacteria	p__Firmicutes	c__Bacilli	o__Lactobacillales	f__Lactobacillaceae	g__unclassified	s__unclassified	number.1 gg_id:00000 some annotation	0	0	0	0	0	0	0	0	0	0	0	1	0	0	0	0	10	0	0	0	0	0	0	0	0	0	0	0	0	0	0	0	0	0	0	0	0	0	0	0	0
242984	k__Bacteria	p__Firmicutes	c__Clostridia	o__Clostridiales	f__Clostridiales_Family_XIII._Incertae_Sedis	g__unclassified	s__unclassified	number.1 gg_id:00000 some annotation	0	0	0	0	0	0	0	0	0	0	0	0	0	0	0	0	0	0	0	1	0	0	0	0	0	0	0	0	0	0	0	0	0	0	0	0	0	0	0	0	0
530801	k__Bacteria	p__Bacteroidetes	c__Bacteroidia	o__Bacteroidales	f__Prevotellaceae	g__Prevotella	s__Prevotella_pallens	number.1 gg_id:00000 some annotation	12	0	1	0	0	0	19	7	2	59	89	0	18	1	0	286	0	111	0	3	5	0	4	0	0	0	4	0	0	0	7	4	167	0	119	233	0	0	189	0	185
561243	k__Bacteria	p__Proteobacteria	c__Gammaproteobacteria	o__Pseudomonadales	f__Pseudomonadaceae	g__Pseudomonas	s__unclassified	number.1 gg_id:00000 some annotation	0	0	0	0	0	0	0	0	3	0	0	0	0	0	0	0	0	0	0	0	0	0	0	0	0	0	0	0	1	58	0	0	0	414	0	0	0	1	0	0	0
221226	k__Bacteria	p__Firmicutes	c__Clostridia	o__Clostridiales	f__Clostridiales_Family_XI._Incertae_Sedis	g__Peptoniphilus	s__unclassified	number.1 gg_id:00000 some annotation	0	0	0	0	0	0	0	0	0	0	0	0	0	0	0	0	0	0	0	0	0	0	0	0	0	0	0	0	0	0	0	0	0	0	0	0	0	0	0	0	0
103428	k__Bacteria	p__Proteobacteria	c__Gammaproteobacteria	o__Pseudomonadales	f__Moraxellaceae	g__Acinetobacter	s__unclassified	number.1 gg_id:00000 some annotation	0	0	0	0	0	0	0	0	0	0	0	0	0	0	0	1	0	0	0	0	0	0	0	0	0	0	0	0	0	0	0	0	0	0	0	0	0	0	0	0	0
15571	k__Bacteria	p__Firmicutes	c__Bacilli	o__Lactobacillales	f__Streptococcaceae	g__Streptococcus	s__Streptococcus_sanguinis	number.1 gg_id:00000 some annotation	0	8	0	1	0	0	2	0	0	0	0	0	3	0	2	1	0	0	0	0	0	0	0	0	0	0	0	0	0	0	0	0	0	0	0	2	0	0	0	0	1
164160	k__Bacteria	p__Firmicutes	c__Clostridia	o__Clostridiales	f__Lachnospiraceae	g__unclassified	s__unclassified	number.1 gg_id:00000 some annotation	0	0	0	0	0	0	0	0	69	0	0	0	0	0	0	0	0	0	0	0	0	72	0	0	0	0	0	0	0	0	0	0	0	0	0	0	0	0	0	0	0
207627	k__Bacteria	p__Bacteroidetes	c__Flavobacteria	o__Flavobacteriales	f__Flavobacteriaceae	g__Flavobacterium	s__Flavobacterium_succinicans	number.1 gg_id:00000 some annotation	0	0	0	0	0	0	0	0	0	0	0	0	0	0	0	0	0	0	0	0	0	0	0	0	0	0	0	0	0	0	0	0	0	0	0	0	0	0	0	0	0
526081	k__Bacteria	p__Firmicutes	c__Clostridia	o__Clostridiales	f__Lachnospiraceae	g__Oribacterium	s__unclassified	number.1 gg_id:00000 some annotation	0	0	0	0	0	0	0	0	0	0	0	0	0	0	0	0	0	0	0	2	0	0	0	0	0	0	0	0	0	0	0	0	0	0	0	0	0	0	0	0	0
355132	k__Bacteria	p__Actinobacteria	c__Actinobacteria	o__Actinomycetales	f__ACK-M1	g__unclassified	s__unclassified	number.1 gg_id:00000 some annotation	0	0	0	0	2	0	0	1	1	1	0	0	0	0	0	0	0	0	0	0	0	0	0	0	0	0	0	0	0	0	0	0	0	0	0	0	0	0	0	0	0
259569	k__Bacteria	p__Bacteroidetes	c__Bacteroidia	o__Bacteroidales	f__Rikenellaceae	g__Alistipes	s__unclassified	number.1 gg_id:00000 some annotation	0	0	0	0	0	0	0	0	0	0	0	0	0	0	0	0	0	0	0	0	0	0	0	0	0	0	0	0	0	361	0	0	0	0	0	0	0	0	0	0	0
262378	k__Bacteria	p__Cyanobacteria	c__Chloroplast	o__Streptophyta	f__unclassified	g__unclassified	s__unclassified	number.1 gg_id:00000 some annotation	0	0	0	0	0	0	0	0	0	0	0	0	0	0	0	0	0	0	0	0	0	0	0	0	0	0	0	0	0	0	0	0	0	3	0	0	0	0	0	0	0
381694	k__Bacteria	p__Firmicutes	c__Clostridia	o__Clostridiales	f__Ruminococcaceae	g__unclassified	s__unclassified	number.1 gg_id:00000 some annotation	0	0	0	0	0	0	0	0	0	0	0	0	0	0	0	0	0	0	0	0	0	0	0	0	0	0	0	0	0	0	0	0	0	0	0	0	0	0	0	0	0
541655	k__Bacteria	p__Proteobacteria	c__Alphaproteobacteria	o__Sphingomonadales	f__Erythrobacteraceae	g__Erythromicrobium	s__Erythromicrobium_ramosum	number.1 gg_id:00000 some annotation	0	0	0	0	0	0	0	0	0	0	0	0	0	0	0	0	0	0	0	0	0	0	0	0	0	0	0	0	0	0	0	0	0	0	0	0	0	1	0	0	0
254988	k__Bacteria	p__Proteobacteria	c__Gammaproteobacteria	o__unclassified	f__unclassified	g__unclassified	s__unclassified	number.1 gg_id:00000 some annotation	0	0	0	0	0	0	0	0	0	0	0	0	0	0	0	0	0	0	0	0	0	0	1	0	0	0	0	0	0	0	0	0	0	0	0	0	0	0	0	0	0
156701	k__Bacteria	p__Proteobacteria	c__Betaproteobacteria	o__Burkholderiales	f__Comamonadaceae	g__unclassified	s__unclassified	number.1 gg_id:00000 some annotation	0	0	0	0	0	0	0	0	0	0	0	0	0	0	0	1	0	0	0	0	0	1	0	0	0	0	0	0	0	0	0	0	0	0	0	0	0	0	0	0	0
374052	k__Bacteria	p__Fusobacteria	c__Fusobacteria	o__Fusobacteriales	f__Fusobacteriaceae	g__Fusobacterium	s__unclassified	number.1 gg_id:00000 some annotation	0	0	0	0	0	2	0	0	0	0	0	0	0	0	0	0	0	0	0	4	0	0	0	0	0	0	0	0	0	0	0	0	0	0	6	0	0	0	0	0	13
35556	k__Bacteria	p__Planctomycetes	c__Planctomycea	o__Planctomycetales	f__Planctomycetaceae	g__A17	s__unclassified	number.1 gg_id:00000 some annotation	0	0	0	0	0	0	0	0	0	0	0	0	0	0	0	0	0	0	0	0	0	0	0	0	0	0	0	0	0	0	0	0	0	0	0	0	0	0	0	0	0
313857	k__Bacteria	p__Actinobacteria	c__Actinobacteria	o__Actinomycetales	f__ACK-M1	g__unclassified	s__unclassified	number.1 gg_id:00000 some annotation	0	0	0	0	1	0	0	0	0	0	0	0	0	0	0	0	0	0	0	0	0	0	0	0	0	0	0	0	0	0	0	0	0	0	0	0	0	0	0	0	0
276632	k__Bacteria	p__Firmicutes	c__Bacilli	o__Lactobacillales	f__Lactobacillaceae	g__Lactobacillus	s__unclassified	number.1 gg_id:00000 some annotation	0	0	0	0	0	0	0	0	0	0	0	0	0	0	0	0	0	0	0	0	0	0	0	0	0	0	0	0	0	0	0	0	0	0	0	0	0	0	0	0	0
561636	k__Bacteria	p__Firmicutes	c__Bacilli	o__Lactobacillales	f__Streptococcaceae	g__Streptococcus	s__unclassified	number.1 gg_id:00000 some annotation	708	289	62	628	190	46	193	2318	871	83	88	559	235	746	235	847	331	9	1	2	3	1	11	0	160	13	7	97	13	0	279	1	23	0	677	187	14	89	220	783	415
86757	k__Bacteria	p__Firmicutes	c__Clostridia	o__Clostridiales	f__Clostridiales_Family_XI._Incertae_Sedis	g__Finegoldia	s__Finegoldia_magna	number.1 gg_id:00000 some annotation	0	0	0	0	0	0	0	0	1	0	0	0	0	3	0	0	0	0	0	0	0	0	0	0	0	0	0	0	0	0	0	0	0	0	0	0	0	0	1	0	0
361496	k__Bacteria	p__Bacteroidetes	c__Bacteroidia	o__Bacteroidales	f__Bacteroidaceae	g__Bacteroides	s__unclassified	number.1 gg_id:00000 some annotation	0	0	0	0	0	0	1	1	640	0	3	1	0	0	0	0	1	0	0	0	1	539	1	0	0	7	0	0	3	2511	0	0	0	455	1	1	0	6	1	3	4
110825	k__Bacteria	p__Firmicutes	c__Clostridia	o__Clostridiales	f__Veillonellaceae	g__Dialister	s__unclassified	number.1 gg_id:00000 some annotation	0	0	0	0	0	0	0	0	0	0	0	0	0	1	0	2	0	0	0	0	0	0	0	0	0	0	0	0	0	0	0	0	0	0	1	0	0	0	0	0	3
173036	k__Bacteria	p__Firmicutes	c__Clostridia	o__Clostridiales	f__Clostridiales_Family_XI._Incertae_Sedis	g__Anaerococcus	s__unclassified	number.1 gg_id:00000 some annotation	0	0	0	0	0	0	0	0	0	0	0	0	0	0	0	0	0	0	0	0	0	0	0	0	0	0	0	0	0	0	0	0	0	0	0	0	0	0	0	0	0
48518	k__Bacteria	p__Proteobacteria	c__Gammaproteobacteria	o__Xanthomonadales	f__Xanthomonadaceae	g__Pseudoxanthomonas	s__unclassified	number.1 gg_id:00000 some annotation	0	0	0	0	0	0	0	0	0	0	0	0	0	0	0	0	0	0	0	0	0	0	0	0	0	0	0	0	1	0	0	0	0	0	0	0	0	0	0	0	0
245523	k__Bacteria	p__Bacteroidetes	c__Bacteroidia	o__Bacteroidales	f__RikenellaceaeII	g__unclassified	s__unclassified	number.1 gg_id:00000 some annotation	1	0	0	0	0	0	0	0	0	0	0	0	0	91	0	0	0	0	0	2465	0	0	2	0	0	0	2	0	0	0	0	0	0	0	21	0	0	0	0	0	0
279205	k__Bacteria	p__Proteobacteria	c__Gammaproteobacteria	o__Pseudomonadales	f__Pseudomonadaceae	g__unclassified	s__unclassified	number.1 gg_id:00000 some annotation	0	0	0	0	0	0	0	0	3	0	0	0	0	1	0	2	0	0	0	0	0	0	0	0	0	0	0	10	2	0	0	0	0	0	0	0	0	0	2	0	1
82696	k__Bacteria	p__Actinobacteria	c__Actinobacteria	o__Actinomycetales	f__Corynebacteriaceae	g__Corynebacterium	s__unclassified	number.1 gg_id:00000 some annotation	0	0	0	0	0	0	0	0	0	0	1	0	0	0	0	0	0	0	0	0	0	0	0	0	0	0	0	0	0	0	0	0	0	0	0	0	0	0	0	0	0
16600	k__Bacteria	p__Firmicutes	c__Bacilli	o__Lactobacillales	f__Aerococcaceae	g__unclassified	s__unclassified	number.1 gg_id:00000 some annotation	0	0	0	0	0	0	0	0	0	0	0	0	0	0	0	0	0	0	0	0	0	0	3	0	0	0	0	0	0	26	0	0	0	0	0	0	0	0	0	0	0
292386	k__Bacteria	p__Firmicutes	c__Clostridia	o__Clostridiales	f__Lachnospiraceae	g__Coprococcus	s__unclassified	number.1 gg_id:00000 some annotation	0	0	0	0	0	0	0	0	0	0	0	0	0	0	0	0	0	0	0	0	0	0	0	0	0	0	0	0	0	0	0	0	0	0	0	1	0	0	0	0	0
266274	k__Bacteria	p__Firmicutes	c__Clostridia	o__Clostridiales	f__Ruminococcaceae	g__Oscillospira	s__unclassified	number.1 gg_id:00000 some annotation	0	0	0	0	0	0	0	0	1	0	0	0	0	0	0	0	0	1	0	0	0	0	0	0	0	0	0	0	0	0	0	0	0	0	0	0	0	1	0	0	0
266075	k__Bacteria	p__Bacteroidetes	c__Bacteroidia	o__Bacteroidales	f__RikenellaceaeII	g__unclassified	s__unclassified	number.1 gg_id:00000 some annotation	0	0	0	0	0	0	0	0	0	0	0	0	0	0	0	0	0	0	0	0	0	0	0	0	0	0	0	0	0	0	0	0	0	0	0	0	0	0	0	0	0
69384	k__Bacteria	p__Actinobacteria	c__Actinobacteria	o__Actinomycetales	f__Corynebacteriaceae	g__Corynebacterium	s__unclassified	number.1 gg_id:00000 some annotation	0	0	0	0	0	0	0	0	0	0	0	0	0	0	0	0	0	0	0	0	0	0	0	0	0	0	0	0	0	0	0	0	0	0	0	0	0	0	0	0	0
565936	k__Bacteria	p__Proteobacteria	c__Betaproteobacteria	o__Burkholderiales	f__Burkholderiaceae	g__Burkholderia	s__unclassified	number.1 gg_id:00000 some annotation	0	0	0	0	0	0	0	0	0	0	0	0	0	0	0	0	0	0	0	0	0	0	0	0	0	0	0	0	0	0	0	0	0	0	0	0	0	0	0	0	0
115132	k__Bacteria	p__Proteobacteria	c__Betaproteobacteria	o__Burkholderiales	f__unclassified	g__unclassified	s__unclassified	number.1 gg_id:00000 some annotation	0	0	0	0	2	0	0	0	0	0	0	0	0	0	0	0	0	0	0	0	0	0	0	0	0	0	0	0	0	0	0	0	0	0	0	0	0	0	0	0	0
335952	k__Bacteria	p__Firmicutes	c__Clostridia	o__Clostridiales	f__Ruminococcaceae	g__unclassified	s__unclassified	number.1 gg_id:00000 some annotation	0	1	0	0	0	0	0	0	11	0	0	0	0	0	0	0	0	0	0	0	0	0	0	0	0	0	0	0	0	87	0	0	0	0	0	0	0	0	0	0	0
25583	k__Bacteria	p__Proteobacteria	c__Deltaproteobacteria	o__Desulfovibrionales	f__Desulfovibrionaceae	g__Desulfovibrio	s__unclassified	number.1 gg_id:00000 some annotation	0	0	0	0	0	0	0	0	0	0	0	0	0	0	0	0	0	0	0	9	38	0	0	0	0	0	0	0	0	0	0	0	1	0	0	1	0	0	0	0	0
566596	k__Bacteria	p__Actinobacteria	c__Actinobacteria	o__Actinomycetales	f__Micrococcaceae	g__Rothia	s__unclassified	number.1 gg_id:00000 some annotation	10	0	1	32	2	1	1	16	12	0	0	16	0	5	9	4	4	1	0	0	0	0	0	0	1	1	0	0	0	0	0	0	0	0	0	0	0	0	0	0	1
74391	k__Bacteria	p__Fusobacteria	c__Fusobacteria	o__Fusobacteriales	f__Fusobacteriaceae	g__Leptotrichia	s__unclassified	number.1 gg_id:00000 some annotation	231	23	8	98	31	2	53	33	19	132	74	0	199	0	8	107	103	1678	0	5	11	214	25	886	428	0	13	51	1548	1	1458	20	3	0	58	2	46	780	2	52	362
262625	k__Bacteria	p__Firmicutes	c__Clostridia	o__Clostridiales	f__Lachnospiraceae	g__unclassified	s__unclassified	number.1 gg_id:00000 some annotation	0	0	0	0	0	0	0	0	19	0	0	0	0	0	0	0	0	0	0	0	0	0	0	0	0	0	0	0	0	0	0	0	0	0	0	0	0	0	0	0	0
105070	k__Bacteria	p__Proteobacteria	c__Gammaproteobacteria	o__Oceanospirillales	f__Alcanivoracaceae	g__Alcanivorax	s__unclassified	number.1 gg_id:00000 some annotation	0	0	0	0	0	0	0	0	0	0	0	0	0	0	0	0	0	0	0	0	0	0	0	0	0	0	0	0	0	1	0	0	0	0	0	0	0	0	0	0	0
341750	k__Bacteria	p__Firmicutes	c__Clostridia	o__Clostridiales	f__Lachnospiraceae	g__Clostridium	s__unclassified	number.1 gg_id:00000 some annotation	0	0	0	0	0	0	0	0	8	0	0	0	0	0	0	0	0	0	0	0	0	0	0	0	0	0	0	0	0	0	0	0	0	0	0	0	0	0	0	0	0
101552	k__Bacteria	p__Proteobacteria	c__Betaproteobacteria	o__Burkholderiales	f__Aquabacteriaceae	g__Aquabacterium	s__unclassified	number.1 gg_id:00000 some annotation	0	4	57	0	55	10	27	4	160	18	11	6	8	14	5	45	18	0	1	0	0	2204	7	0	0	17	1	1	117	0	1	0	0	0	0	1	0	7	0	0	13
277104	k__Bacteria	p__Firmicutes	c__Clostridia	o__Clostridiales	f__Lachnospiraceae	g__unclassified	s__unclassified	number.1 gg_id:00000 some annotation	0	0	0	0	0	0	0	0	0	0	0	0	0	0	0	0	0	0	0	0	0	0	0	0	0	0	0	0	0	0	0	0	0	0	0	0	0	0	0	0	0
205617	k__Bacteria	p__Bacteroidetes	c__Bacteroidia	o__Bacteroidales	f__RikenellaceaeII	g__unclassified	s__unclassified	number.1 gg_id:00000 some annotation	0	0	0	0	0	0	0	0	114	0	3	0	0	0	0	0	0	0	0	0	0	0	0	0	0	0	0	0	0	169	0	0	0	80	0	0	0	0	0	0	0
97301	k__Bacteria	p__Firmicutes	c__Clostridia	o__Clostridiales	f__unclassified	g__unclassified	s__unclassified	number.1 gg_id:00000 some annotation	0	0	0	0	0	0	0	0	0	0	0	0	0	0	0	0	0	0	31	0	0	0	0	0	0	0	0	0	0	0	0	0	0	0	0	0	0	0	0	0	0
311942	k__Bacteria	p__Proteobacteria	c__Gammaproteobacteria	o__Legionellales	f__Legionellaceae	g__Legionella	s__unclassified	number.1 gg_id:00000 some annotation	0	0	0	0	0	0	0	1	0	0	0	0	0	0	0	0	0	0	0	0	0	0	0	0	0	0	0	0	0	0	0	0	0	0	0	0	0	0	0	0	1
470190	k__Bacteria	p__Actinobacteria	c__Actinobacteria	o__Actinomycetales	f__Corynebacteriaceae	g__Corynebacterium	s__unclassified	number.1 gg_id:00000 some annotation	0	0	0	0	0	0	0	0	0	0	0	0	0	0	0	0	0	0	0	0	0	0	0	0	0	0	0	0	0	0	0	0	0	0	0	0	0	0	0	0	0
349216	k__Bacteria	p__Bacteroidetes	c__Bacteroidia	o__Bacteroidales	f__Bacteroidaceae	g__Bacteroides	s__Bacteroides_uniformis	number.1 gg_id:00000 some annotation	0	0	0	0	1	0	0	0	15	0	0	0	0	0	0	0	0	0	0	0	0	187	1	0	0	0	0	0	0	1	0	0	0	195	1	0	0	0	0	0	0
293896	k__Bacteria	p__Firmicutes	c__Clostridia	o__Clostridiales	f__Lachnospiraceae	g__unclassified	s__unclassified	number.1 gg_id:00000 some annotation	0	0	0	0	0	0	0	0	0	0	0	0	0	0	0	0	0	0	0	0	0	0	0	0	0	5	0	0	0	0	0	0	0	0	0	0	0	0	0	0	0
185451	k__Bacteria	p__Bacteroidetes	c__Bacteroidia	o__Bacteroidales	f__Rikenellaceae	g__Alistipes	s__unclassified	number.1 gg_id:00000 some annotation	0	0	0	0	0	0	0	0	0	0	0	0	0	0	0	0	0	0	0	0	0	0	1	0	0	0	0	0	0	594	0	0	0	90	0	0	0	0	0	0	0
241543	k__Bacteria	p__Actinobacteria	c__Actinobacteria	o__Actinomycetales	f__Nocardiaceae	g__Rhodococcus	s__unclassified	number.1 gg_id:00000 some annotation	0	0	0	0	0	0	0	0	0	0	0	0	0	0	0	0	0	0	0	0	0	0	0	0	0	0	0	0	0	0	0	0	0	0	0	0	0	0	0	0	0
592118	k__Bacteria	p__Proteobacteria	c__Betaproteobacteria	o__Burkholderiales	f__Comamonadaceae	g__unclassified	s__unclassified	number.1 gg_id:00000 some annotation	0	1	1	0	2	0	0	0	0	0	0	0	0	0	0	1	0	0	0	0	0	1	0	0	0	0	0	0	0	0	0	0	0	0	0	0	0	0	0	0	0
274801	k__Bacteria	p__Actinobacteria	c__Actinobacteria	o__Actinomycetales	f__Micrococcaceae	g__Kocuria	s__unclassified	number.1 gg_id:00000 some annotation	0	0	0	0	0	0	0	0	0	0	0	0	0	1	0	0	0	0	0	0	0	0	0	0	0	0	0	0	0	0	0	0	0	0	0	0	0	0	0	0	0
184983	k__Bacteria	p__Firmicutes	c__Clostridia	o__Clostridiales	f__Lachnospiraceae	g__Blautia	s__unclassified	number.1 gg_id:00000 some annotation	0	0	0	0	0	0	0	0	0	0	0	0	0	0	0	0	0	0	0	0	0	0	0	0	0	0	0	0	0	0	0	0	0	2	0	0	0	0	0	0	0
484296	k__Bacteria	p__Actinobacteria	c__Actinobacteria	o__Coriobacteriales	f__Coriobacteriaceae	g__Atopobium	s__unclassified	number.1 gg_id:00000 some annotation	0	0	0	0	0	0	4	1	0	0	17	16	9	15	1	26	0	1	10	9	5	0	5	0	0	2	7	0	11	0	0	0	0	0	785	1	0	2	0	0	46
329653	k__Bacteria	p__Bacteroidetes	c__Flavobacteria	o__Flavobacteriales	f__Flavobacteriaceae	g__Flavobacterium	s__unclassified	number.1 gg_id:00000 some annotation	0	0	0	0	1	0	0	0	0	0	0	0	0	0	0	0	0	0	0	0	0	0	0	0	0	0	0	0	0	0	0	0	0	0	0	0	0	0	0	0	0
134601	k__Bacteria	p__Firmicutes	c__Bacilli	o__Turicibacterales	f__Turicibacteraceae	g__unclassified	s__unclassified	number.1 gg_id:00000 some annotation	0	0	0	0	0	0	0	0	7	0	0	0	0	0	0	0	0	0	0	0	0	0	0	0	0	0	0	0	0	0	0	0	0	0	0	0	0	0	0	0	0
152148	k__Bacteria	p__Cyanobacteria	c__Synechococcophycideae	o__unclassified	f__unclassified	g__unclassified	s__unclassified	number.1 gg_id:00000 some annotation	0	0	0	0	0	0	0	0	0	0	0	0	0	0	0	0	0	0	0	0	0	0	0	0	0	0	0	0	0	0	0	0	0	96	0	0	0	0	0	0	0
71387	k__Bacteria	p__Firmicutes	c__Clostridia	o__Clostridiales	f__Lachnospiraceae	g__unclassified	s__unclassified	number.1 gg_id:00000 some annotation	0	0	0	0	0	0	0	0	0	0	0	1	0	0	0	9	0	0	0	0	2	13	22	8	0	0	0	0	0	0	0	0	1	0	1	8	0	457	0	0	0
164959	k__Bacteria	p__Proteobacteria	c__Betaproteobacteria	o__Burkholderiales	f__Comamonadaceae	g__unclassified	s__unclassified	number.1 gg_id:00000 some annotation	0	0	0	0	0	0	0	0	0	0	0	0	0	0	0	0	0	0	0	0	0	0	0	0	0	0	0	0	1	0	0	0	0	0	0	0	0	0	0	0	0
182079	k__Bacteria	p__Firmicutes	c__Clostridia	o__Clostridiales	f__Lachnospiraceae	g__unclassified	s__unclassified	number.1 gg_id:00000 some annotation	0	0	0	0	0	0	0	1	0	0	0	0	0	0	0	0	0	0	0	0	0	0	0	0	0	0	0	0	0	0	0	0	0	1	0	0	0	0	0	0	0
133779	k__Bacteria	p__Firmicutes	c__Clostridia	o__Clostridiales	f__Lachnospiraceae	g__unclassified	s__unclassified	number.1 gg_id:00000 some annotation	0	0	0	0	0	0	0	0	1	0	0	0	0	0	0	0	0	0	0	0	0	0	0	0	0	0	0	0	0	0	0	0	0	0	0	0	0	0	0	0	0
278234	k__Bacteria	p__Verrucomicrobia	c__Verrucomicrobiae	o__Verrucomicrobiales	f__Verrucomicrobiaceae	g__Akkermansia	s__Akkermansia_muciniphila	number.1 gg_id:00000 some annotation	0	1	0	0	12	0	0	0	187	6	2	0	0	0	0	1	1	0	0	0	5	425	1	0	0	0	0	3	0	3287	0	0	0	0	1	0	0	7	3	0	5
528237	k__Bacteria	p__Firmicutes	c__Clostridia	o__Clostridiales	f__Lachnospiraceae	g__unclassified	s__unclassified	number.1 gg_id:00000 some annotation	0	0	0	0	0	0	0	0	8	0	0	0	0	0	0	0	0	0	0	0	0	0	0	0	0	0	0	0	0	0	0	0	0	0	0	0	0	0	0	0	0
68416	k__Bacteria	p__Bacteroidetes	c__Bacteroidia	o__Bacteroidales	f__Prevotellaceae	g__Prevotella	s__unclassified	number.1 gg_id:00000 some annotation	0	0	0	0	0	0	1	0	0	1	0	1	0	36	0	1	0	0	0	3	60	0	0	0	0	0	0	0	2	0	0	0	0	0	13	97	0	0	0	0	0
70671	k__Bacteria	p__Bacteroidetes	c__Bacteroidia	o__Bacteroidales	f__Prevotellaceae	g__Prevotella	s__unclassified	number.1 gg_id:00000 some annotation	0	0	0	0	0	0	0	0	0	0	0	1	0	0	0	2	9	0	0	0	0	0	0	0	0	0	0	0	0	0	0	0	13	0	11	78	0	0	3	0	19
199441	k__Bacteria	p__Proteobacteria	c__Betaproteobacteria	o__Burkholderiales	f__Comamonadaceae	g__Hydrogenophaga	s__unclassified	number.1 gg_id:00000 some annotation	0	0	1	0	0	0	0	0	0	0	0	0	0	0	0	0	0	0	0	0	0	0	0	0	0	0	0	0	0	0	0	0	0	0	0	0	0	0	0	0	0
558276	k__Bacteria	p__Proteobacteria	c__Gammaproteobacteria	o__Pasteurellales	f__Pasteurellaceae	g__unclassified	s__unclassified	number.1 gg_id:00000 some annotation	1	0	2	1	0	0	0	1	0	0	0	0	0	0	0	0	0	1	0	0	0	0	0	0	0	0	0	1	1	0	1	0	0	0	0	0	0	0	1	0	0
518033	k__Bacteria	p__Firmicutes	c__Bacilli	o__Lactobacillales	f__Lactobacillaceae	g__Lactobacillus	s__Lactobacillus_zeae	number.1 gg_id:00000 some annotation	0	0	0	0	0	0	0	0	0	0	0	5	0	0	0	0	0	0	0	0	0	0	0	0	0	308	0	0	0	0	0	0	0	0	0	0	0	0	0	0	0
363400	k__Bacteria	p__Firmicutes	c__Clostridia	o__Clostridiales	f__Lachnospiraceae	g__Eubacterium	s__unclassified	number.1 gg_id:00000 some annotation	0	0	0	0	0	0	0	0	0	0	0	0	0	0	0	0	0	0	0	0	0	0	0	0	0	0	0	0	1	99	0	0	0	84	0	0	0	0	0	0	0
320249	k__Bacteria	p__Firmicutes	c__Clostridia	o__Clostridiales	f__Ruminococcaceae	g__unclassified	s__unclassified	number.1 gg_id:00000 some annotation	0	0	0	0	0	0	0	0	0	0	0	0	0	0	0	0	0	0	0	0	0	0	0	0	0	0	0	0	0	1	0	0	0	0	0	0	0	0	0	0	0
41248	k__Bacteria	p__Firmicutes	c__Bacilli	o__Lactobacillales	f__Carnobacteriaceae	g__unclassified	s__unclassified	number.1 gg_id:00000 some annotation	0	0	0	0	0	0	0	0	0	0	0	0	0	0	0	0	0	0	0	0	0	0	0	0	0	0	0	0	0	0	0	0	0	0	0	0	0	0	0	0	0
15898	k__Bacteria	p__Tenericutes	c__Mollicutes	o__Mycoplasmatales	f__Mycoplasmataceae	g__Mycoplasma	s__Mycoplasma_arginini	number.1 gg_id:00000 some annotation	0	0	0	0	0	0	0	0	0	0	0	0	115	21	0	0	0	0	0	7	0	0	0	0	0	0	0	0	0	0	0	0	0	0	18	0	0	0	0	0	0
542828	k__Bacteria	p__Actinobacteria	c__Actinobacteria	o__Actinomycetales	f__Mycobacteriaceae	g__Mycobacterium	s__unclassified	number.1 gg_id:00000 some annotation	0	0	0	0	0	0	0	0	0	0	0	0	0	0	0	0	0	0	0	0	0	0	0	0	0	0	0	0	0	13	0	0	0	0	0	0	0	0	0	0	0
306159	k__Bacteria	p__Proteobacteria	c__Betaproteobacteria	o__Burkholderiales	f__unclassified	g__unclassified	s__unclassified	number.1 gg_id:00000 some annotation	0	0	0	0	0	0	0	0	0	0	0	0	0	0	0	0	0	0	0	0	0	0	0	0	0	0	0	0	0	0	0	0	0	0	0	0	0	0	0	0	0
125230	k__Bacteria	p__Bacteroidetes	c__Bacteroidia	o__Bacteroidales	f__unclassified	g__unclassified	s__unclassified	number.1 gg_id:00000 some annotation	0	0	0	0	0	0	0	0	0	0	0	0	0	0	0	0	0	0	0	0	0	0	0	0	0	0	0	0	0	0	0	0	0	0	3	0	0	0	0	0	0
537420	k__Bacteria	p__Tenericutes	c__Erysipelotrichi	o__Erysipelotrichales	f__Erysipelotrichaceae	g__Bulleidia	s__unclassified	number.1 gg_id:00000 some annotation	0	0	0	0	0	0	0	0	0	1	10	0	1	0	0	0	0	0	0	4	0	0	0	0	0	0	0	0	0	0	0	0	0	0	0	0	0	0	0	0	6
112562	k__Bacteria	p__Proteobacteria	c__Deltaproteobacteria	o__Myxococcales	f__Haliangiaceae	g__unclassified	s__unclassified	number.1 gg_id:00000 some annotation	0	0	0	0	0	0	0	0	0	0	0	0	0	0	0	0	0	0	0	0	0	0	0	0	0	0	0	0	0	0	0	0	0	0	0	0	0	0	0	0	0
275171	k__Bacteria	p__Proteobacteria	c__Gammaproteobacteria	o__Xanthomonadales	f__Xanthomonadaceae	g__Stenotrophomonas	s__unclassified	number.1 gg_id:00000 some annotation	0	0	0	0	0	0	0	0	0	0	0	0	0	0	0	0	0	0	0	0	0	0	0	0	0	0	0	0	2	0	0	0	0	0	0	0	0	2	0	0	0
109546	k__Bacteria	p__Firmicutes	c__Clostridia	o__Clostridiales	f__Ruminococcaceae	g__unclassified	s__unclassified	number.1 gg_id:00000 some annotation	0	0	0	0	0	0	0	0	0	0	0	0	0	0	0	0	0	0	0	0	0	0	0	0	0	0	0	0	0	0	0	0	0	0	0	0	0	0	0	0	0
109541	k__Bacteria	p__Bacteroidetes	c__Bacteroidia	o__Bacteroidales	f__Rikenellaceae	g__Alistipes	s__unclassified	number.1 gg_id:00000 some annotation	0	0	0	0	0	0	0	0	1	0	0	0	0	0	0	0	0	0	0	0	0	0	0	0	0	0	0	0	0	0	0	0	0	69	0	0	0	0	0	0	0
179428	k__Bacteria	p__Firmicutes	c__Clostridia	o__Clostridiales	f__Lachnospiraceae	g__Blautia	s__unclassified	number.1 gg_id:00000 some annotation	0	0	0	0	0	0	0	0	0	0	0	0	0	0	0	0	0	0	0	0	0	0	0	0	0	0	0	0	0	0	0	0	0	1	0	0	0	0	0	0	0
251817	k__Bacteria	p__Actinobacteria	c__Actinobacteria	o__Actinomycetales	f__Micrococcaceae	g__unclassified	s__unclassified	number.1 gg_id:00000 some annotation	0	0	0	0	0	0	0	0	0	0	0	0	0	1	0	0	0	0	0	0	0	0	0	0	0	0	0	0	0	0	0	0	0	0	0	0	0	0	0	0	0
183187	k__Bacteria	p__Firmicutes	c__Clostridia	o__Clostridiales	f__Ruminococcaceae	g__unclassified	s__unclassified	number.1 gg_id:00000 some annotation	0	0	0	0	0	0	0	0	0	0	0	0	0	0	0	0	0	0	0	0	0	0	0	0	0	0	0	0	0	0	0	0	0	0	0	0	0	0	0	0	0
437088	k__Bacteria	p__Bacteroidetes	c__Sphingobacteria	o__Sphingobacteriales	f__Rhodothermaceae	g__unclassified	s__unclassified	number.1 gg_id:00000 some annotation	0	0	0	0	0	0	0	0	4	0	0	0	0	0	0	0	0	0	0	0	0	0	0	0	0	0	0	0	0	0	0	0	0	0	0	0	0	0	0	0	0
194745	k__Bacteria	p__Firmicutes	c__Clostridia	o__Clostridiales	f__Lachnospiraceae	g__unclassified	s__unclassified	number.1 gg_id:00000 some annotation	0	0	0	0	0	0	0	0	0	0	0	0	0	0	0	0	0	0	0	0	0	0	0	0	0	0	0	0	0	0	0	0	0	1	0	0	0	0	0	0	0
174256	k__Bacteria	p__Firmicutes	c__Clostridia	o__Clostridiales	f__Lachnospiraceae	g__Coprococcus	s__unclassified	number.1 gg_id:00000 some annotation	0	0	0	0	0	0	0	0	0	0	0	0	0	0	0	0	0	0	0	0	0	0	0	0	0	0	0	0	0	260	0	0	0	93	0	0	0	0	1	0	0
469655	k__Bacteria	p__Firmicutes	c__Clostridia	o__Clostridiales	f__Clostridiales_Family_XI._Incertae_Sedis	g__Anaerococcus	s__Anaerococcus_prevotii	number.1 gg_id:00000 some annotation	0	0	0	0	0	0	0	0	0	0	0	0	0	0	0	0	0	0	0	0	0	0	0	0	0	0	0	0	0	0	0	0	0	0	0	0	0	0	0	0	0
470527	k__Bacteria	p__Firmicutes	c__Bacilli	o__Lactobacillales	f__Lactobacillaceae	g__Lactobacillus	s__Lactobacillus_vaginalis	number.1 gg_id:00000 some annotation	0	0	0	0	0	0	0	0	16	0	0	2	3	10	1	0	0	0	0	1	3	0	0	0	0	0	0	1	0	0	0	0	0	723	0	0	0	0	0	0	0
470523	k__Bacteria	p__Proteobacteria	c__Betaproteobacteria	o__Neisseriales	f__Neisseriaceae	g__Kingella	s__unclassified	number.1 gg_id:00000 some annotation	0	35	171	0	0	4	13	3	9	0	0	0	0	5	2	43	0	1	0	0	19	0	0	0	0	1	0	5	0	0	0	1	1	0	38	5	8	0	38	0	0
226483	k__Bacteria	p__Proteobacteria	c__Alphaproteobacteria	o__Sphingomonadales	f__Sphingomonadaceae	g__Sphingomonas	s__unclassified	number.1 gg_id:00000 some annotation	0	0	0	0	0	0	0	0	0	0	0	0	0	0	0	2	0	0	0	0	0	0	0	0	0	0	0	0	0	0	0	0	0	0	0	0	0	0	0	0	0
471124	k__Bacteria	p__Proteobacteria	c__Gammaproteobacteria	o__Pseudomonadales	f__Moraxellaceae	g__Acinetobacter	s__unclassified	number.1 gg_id:00000 some annotation	0	0	1	0	5	0	0	0	0	0	0	0	0	0	0	0	0	0	0	0	0	0	0	0	0	0	0	0	0	0	0	0	0	0	0	0	0	0	0	0	0
471120	k__Bacteria	p__Firmicutes	c__Clostridia	o__Clostridiales	f__Lachnospiraceae	g__Oribacterium	s__unclassified	number.1 gg_id:00000 some annotation	0	0	0	0	0	1	10	0	0	28	166	18	3	35	4	38	3	0	0	2	6	240	691	0	0	0	0	0	0	0	0	0	0	0	39	1	1	0	0	0	8
47990	k__Bacteria	p__Proteobacteria	c__Betaproteobacteria	o__Neisseriales	f__Neisseriaceae	g__unclassified	s__unclassified	number.1 gg_id:00000 some annotation	0	0	0	0	0	0	0	0	0	0	0	0	0	0	0	0	0	0	0	0	0	0	0	0	0	0	0	0	0	0	0	0	0	0	0	0	0	0	0	0	0
109729	k__Bacteria	p__Proteobacteria	c__Gammaproteobacteria	o__Pseudomonadales	f__Pseudomonadaceae	g__Pseudomonas	s__Pseudomonas_balearica	number.1 gg_id:00000 some annotation	0	0	0	0	0	0	0	0	0	0	0	0	0	0	0	0	0	0	0	0	0	0	0	0	0	0	0	0	0	0	0	0	0	0	0	0	0	0	0	0	0
206279	k__Bacteria	p__Bacteroidetes	c__Sphingobacteria	o__Sphingobacteriales	f__Chitinophagaceae	g__unclassified	s__unclassified	number.1 gg_id:00000 some annotation	0	0	0	0	0	0	0	0	6	0	0	0	0	0	0	0	0	0	0	0	0	0	0	0	0	0	0	0	0	0	0	0	0	0	0	0	0	0	0	0	0
6942	k__Bacteria	p__Proteobacteria	c__Betaproteobacteria	o__Burkholderiales	f__unclassified	g__unclassified	s__unclassified	number.1 gg_id:00000 some annotation	0	0	0	0	0	0	0	0	0	0	0	0	0	0	0	0	0	0	0	0	0	0	0	0	0	0	0	0	0	0	0	0	0	0	0	0	0	0	0	0	0
325947	k__Bacteria	p__Proteobacteria	c__Betaproteobacteria	o__Burkholderiales	f__Oxalobacteraceae	g__unclassified	s__unclassified	number.1 gg_id:00000 some annotation	0	0	0	0	0	0	0	0	5	0	0	0	0	0	0	0	0	0	0	0	0	0	0	0	0	0	0	0	0	0	0	0	0	0	0	0	0	0	0	0	0
326369	k__Bacteria	p__Tenericutes	c__Erysipelotrichi	o__Erysipelotrichales	f__Erysipelotrichaceae	g__Coprobacillus	s__unclassified	number.1 gg_id:00000 some annotation	0	0	0	0	0	0	0	0	0	0	0	0	0	0	0	0	0	0	0	0	0	0	0	0	0	0	0	0	0	0	0	0	0	0	0	0	0	0	0	0	0
114813	k__Bacteria	p__Bacteroidetes	c__Bacteroidia	o__Bacteroidales	f__Prevotellaceae	g__Prevotella	s__unclassified	number.1 gg_id:00000 some annotation	0	0	0	0	0	0	0	0	5	0	0	0	0	7	0	0	0	0	0	7	1	0	0	0	0	0	0	0	0	0	0	0	0	0	7	0	0	0	0	0	0
180983	k__Bacteria	p__Firmicutes	c__Clostridia	o__Clostridiales	f__Lachnospiraceae	g__Eubacterium	s__unclassified	number.1 gg_id:00000 some annotation	0	0	0	0	0	0	0	0	0	0	0	0	0	0	0	0	0	0	0	0	0	0	0	0	0	0	0	0	0	1	0	0	0	0	0	0	0	0	0	0	0
353461	k__Bacteria	p__Proteobacteria	c__Gammaproteobacteria	o__Pseudomonadales	f__Moraxellaceae	g__Acinetobacter	s__unclassified	number.1 gg_id:00000 some annotation	0	0	0	0	0	0	2	0	0	0	0	0	0	0	0	0	0	0	0	0	0	0	0	0	0	0	0	0	0	0	0	0	0	0	0	0	0	0	0	0	0
336869	k__Bacteria	p__Planctomycetes	c__Planctomycea	o__Gemmatales	f__Gemmataceae	g__Gemmata	s__unclassified	number.1 gg_id:00000 some annotation	0	0	0	0	0	0	0	0	0	0	0	0	0	0	0	0	0	0	0	0	0	0	0	0	0	0	0	0	0	0	0	0	0	0	0	0	0	0	0	0	0
216254	k__Bacteria	p__Cyanobacteria	c__Chloroplast	o__Streptophyta	f__unclassified	g__unclassified	s__unclassified	number.1 gg_id:00000 some annotation	0	0	0	0	0	0	0	0	0	0	0	0	0	0	0	0	0	0	0	0	0	0	0	0	0	0	0	0	0	0	0	0	0	8	0	0	0	0	0	0	0
393399	k__Bacteria	p__Bacteroidetes	c__Bacteroidia	o__Bacteroidales	f__RikenellaceaeII	g__unclassified	s__unclassified	number.1 gg_id:00000 some annotation	0	0	0	0	0	0	0	0	32	0	0	0	0	0	0	0	0	0	0	0	0	0	0	0	0	0	0	0	0	0	0	0	0	86	0	0	0	0	0	0	0
307143	k__Bacteria	p__Proteobacteria	c__Gammaproteobacteria	o__Pseudomonadales	f__Moraxellaceae	g__Alkanindiges	s__unclassified	number.1 gg_id:00000 some annotation	0	0	0	0	0	0	0	0	0	0	0	0	0	0	0	0	0	0	0	0	0	1	0	0	0	0	0	0	0	0	0	0	0	0	0	0	0	0	0	0	0
12558	k__Bacteria	p__Actinobacteria	c__Actinobacteria	o__Actinomycetales	f__Actinomycetaceae	g__Actinomyces	s__unclassified	number.1 gg_id:00000 some annotation	0	3	2	0	0	0	0	0	1	0	0	1	0	0	2	0	1	0	0	0	0	1	9	0	0	0	0	0	0	0	0	0	0	0	4	0	23	0	0	0	0
13825	k__Bacteria	p__Firmicutes	c__Clostridia	o__Clostridiales	f__Veillonellaceae	g__Dialister	s__unclassified	number.1 gg_id:00000 some annotation	0	0	0	0	0	1	0	0	0	1	3	10	34	7	6	6	0	0	27	308	168	56	4	0	0	0	5	0	2	0	0	4	0	0	56	3	3	0	1	0	2
562676	k__Bacteria	p__Proteobacteria	c__Gammaproteobacteria	o__Pasteurellales	f__Pasteurellaceae	g__Aggregatibacter	s__Aggregatibacter_actinomycetemcomitans	number.1 gg_id:00000 some annotation	0	0	0	0	0	0	0	0	0	0	0	0	0	4	0	0	0	0	0	0	0	0	0	0	0	0	0	0	0	0	0	0	0	0	0	0	0	0	0	0	0
510872	k__Bacteria	p__Firmicutes	c__Bacilli	o__Lactobacillales	f__Aerococcaceae	g__Facklamia	s__unclassified	number.1 gg_id:00000 some annotation	0	0	0	0	0	0	0	0	0	0	0	0	0	0	0	0	0	0	0	0	0	0	0	0	0	0	0	0	0	1	0	0	0	0	0	0	0	0	0	0	0
194924	k__Bacteria	p__Firmicutes	c__Clostridia	o__Clostridiales	f__Lachnospiraceae	g__unclassified	s__unclassified	number.1 gg_id:00000 some annotation	0	0	0	0	0	0	0	0	0	0	0	0	0	0	0	0	0	0	0	0	0	0	0	0	0	0	0	0	0	0	0	0	0	0	0	0	0	0	0	0	1
110621	k__Bacteria	p__Proteobacteria	c__Gammaproteobacteria	o__Pseudomonadales	f__Pseudomonadaceae	g__Pseudomonas	s__unclassified	number.1 gg_id:00000 some annotation	0	0	0	0	0	0	0	0	0	0	0	1	0	0	0	0	0	0	0	0	0	0	0	0	0	0	0	0	0	0	0	0	0	0	0	0	0	0	0	0	0
73887	k__Bacteria	p__Fusobacteria	c__Fusobacteria	o__Fusobacteriales	f__Fusobacteriaceae	g__Leptotrichia	s__unclassified	number.1 gg_id:00000 some annotation	0	0	0	0	0	0	0	0	0	0	0	0	19	0	0	116	0	0	0	0	0	0	0	0	0	0	97	0	0	0	0	0	0	0	2	0	22	0	0	0	35
136452	k__Bacteria	p__Firmicutes	c__Clostridia	o__Clostridiales	f__Lachnospiraceae	g__unclassified	s__unclassified	number.1 gg_id:00000 some annotation	0	0	0	0	0	0	0	0	25	0	0	0	0	0	0	0	0	0	0	0	0	0	0	0	0	0	0	0	0	0	0	0	0	1	0	0	0	0	0	0	0
180839	k__Bacteria	p__Proteobacteria	c__Alphaproteobacteria	o__Sphingomonadales	f__Sphingomonadaceae	g__Novosphingobium	s__unclassified	number.1 gg_id:00000 some annotation	0	0	0	0	0	0	0	0	0	0	0	0	0	0	0	0	0	0	0	0	0	1	0	0	0	0	0	0	0	0	0	0	0	0	0	0	0	0	0	0	0
242796	k__Bacteria	p__TM7	c__TM7-3	o__EW055	f__unclassified	g__unclassified	s__unclassified	number.1 gg_id:00000 some annotation	0	0	0	0	0	0	0	0	0	0	0	0	0	0	0	0	0	0	0	0	0	0	9	0	0	0	0	0	0	0	0	0	0	0	0	0	0	0	0	0	0
206906	k__Bacteria	p__Firmicutes	c__Clostridia	o__Clostridiales	f__Ruminococcaceae	g__unclassified	s__unclassified	number.1 gg_id:00000 some annotation	0	0	0	0	0	0	0	0	1	0	0	0	0	0	0	0	0	0	0	0	0	0	0	0	0	0	0	0	0	0	0	0	0	0	0	0	0	0	0	0	0
267628	k__Bacteria	p__Firmicutes	c__Clostridia	o__Clostridiales	f__Lachnospiraceae	g__unclassified	s__unclassified	number.1 gg_id:00000 some annotation	0	0	0	0	0	0	0	0	15	0	0	0	0	0	0	0	0	0	0	0	0	0	0	0	0	0	0	0	0	0	0	0	0	1	0	0	0	0	0	0	0
[truncated: 28 more columns]
